# Supplementary material
Source: PubMed Central journal article supplement (PMC5604885)

# Photocatalytic Aminodecarboxylation of Carboxylic Acids

Simon B. Lang, Kaitie C. Cartwright<sup>†</sup>, Richard S. Welter<sup>†</sup>, Theresa M. Locascio, Jon A. Tunge

## Supporting Information

### Table of Contents

|                                                                        |     |
|------------------------------------------------------------------------|-----|
| <b>1:</b> General considerations                                       | 2   |
| <b>2:</b> General experimental procedures                              | 3   |
| <b>3:</b> Characterization of products                                 | 4   |
| <b>4:</b> References                                                   | 12  |
| <b>5:</b> <sup>1</sup> H and <sup>13</sup> N NMR spectroscopy reprints | 13+ |

## 1. General Considerations

TLC analysis was performed (fluorescence quenching or phosphomolybdic acid stain) with silica gel HL TLC plates with UV254 purchased from Sorbent Technologies.

Silica gel used for column chromatography (60 Å porosity, 230 x 400 mesh, standard grade) was purchased from Sorbent Technologies (catalog # 30930M-25).

Aluminum oxide for column chromatography (58 Å porosity, activated, neutral, Brockman I was purchased from Sigma Aldrich (CAS: 1344-28-1).

The photocatalyst, Mes-Acr-Ph, and the diisopropyl azidocarboxylate (DIAD) were purchased from Sigma Aldrich.

Anhydrous MeCN was purchased from Sigma Aldrich.

All carboxylic acid starting materials, except for 2-(4-(dibenzylamino)phenyl)acetic acid which was previously made in our lab,<sup>1</sup> are commercially available.

GC/MS data was obtained on a Shimadzu GCMS-QP2010 SE. <sup>1</sup>H and <sup>13</sup>C NMR spectra were obtained on a Bruker ADVANCE 500 DRX equipped with a QNP cryoprobe. These spectra were referenced to residual protio solvent signals. HRMS data was obtained on an ESI LC-TOF Micromass LCT (Waters).

Final aminodecarboxylation reactions were run in a screw threaded tube from Chemglass (CLS-4208). Kessil H150 Blue LED grow lights provided 450 nm light. A 4.0 mL solution of MeCN had an internal temperature of 33°C after 1 hour under standard reaction conditions.

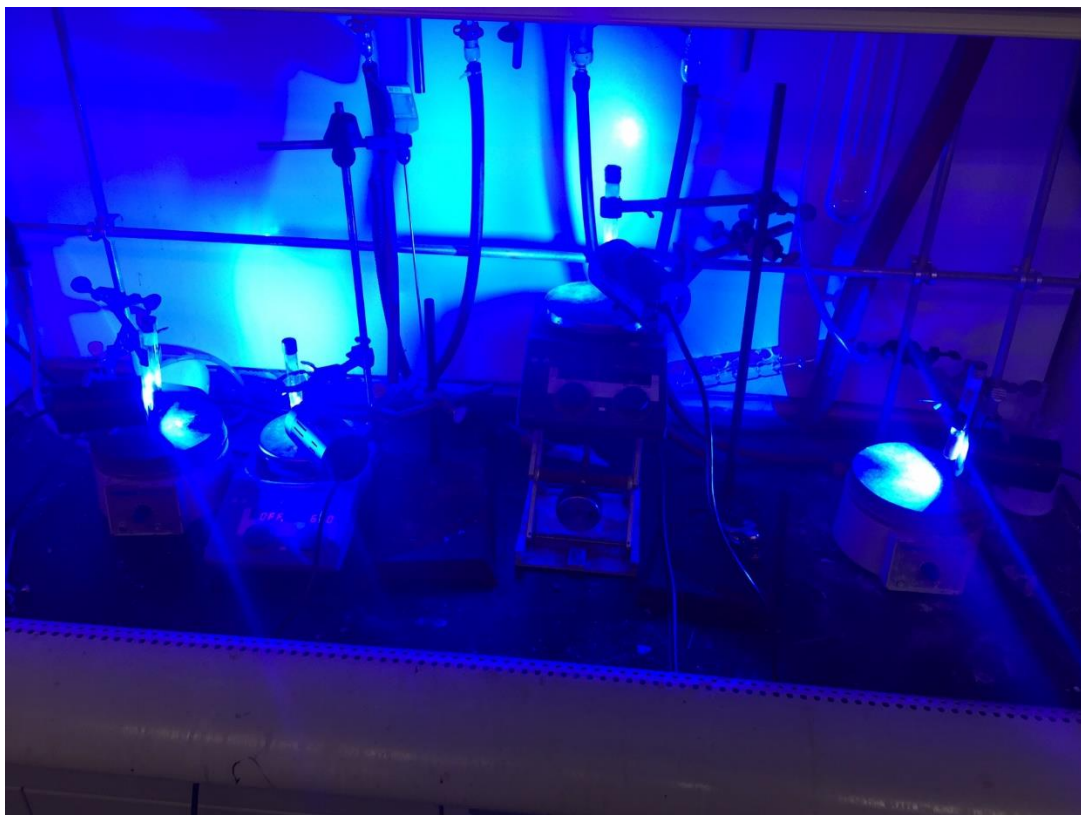

## 2. General Experimental Procedures

**Aminodecarboxylation:** A 16 x 125 mm threaded glass tube was charged with a stir bar, 0.4 mmol carboxylic acid starting material, and 0.002 g (1 mol%) of Mes-Acr-Ph photocatalyst. 4.0 mL of MeCN was added to the vial which was then capped and sparged with Ar for 5 minutes. After sparging, DBU (0.1 mmol) and DIAD (0.5 mmol) were added sequentially via syringe. The reaction was placed in front of 450 nm blue LEDs and analyzed by GC/MS. When the reaction was complete the solvent was removed *in vacuo* and the residue was purified by flash column chromatography on silica gel with 1% Et<sub>3</sub>N in the eluent. If decomposition of the product was observed by GC/MS post chromatography, then neutral aluminum oxide was used as the stationary phase.

**Product Manipulation<sup>2</sup>:** A 10 mL oven dried Schlenk flask was cooled under an atmosphere of argon. A stir bar, Cs<sub>2</sub>CO<sub>3</sub> (0.196g, 0.6 mmol) and 3 mL MeCN were added. Next, product **2c** (0.068g, 0.22 mmol) was added followed by methyl bromoacetate (0.069g, 0.4 mmol) and the reaction mixture was capped and heated at 50 °C overnight. Lastly, the reaction was quenched with 5 mL of aq NH<sub>4</sub>Cl and extracted with EtOAc (3x10 mL). The combined organics were washed with brine, dried with MgSO<sub>4</sub>, and concentrated *in vacuo*.

The crude material was dissolved in 1.0 mL MeCN and transferred to a 16 x 125 mm threaded glass tube that was charged with a stir bar and Cs<sub>2</sub>CO<sub>3</sub> (0.130g, 0.4 mmol). The tube was capped and heated overnight (bath temperature 115 °C). The crude reaction was loaded directly onto a silica gel column and purified (1:15 to 1:10 EtOAc to hexanes) to provide 0.0455g (93%) of the desired carbamate **3c**.

### 3. Characterization of Products

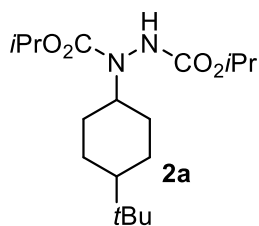

A mixture of rotamers and diastereomers (1:1 d.r.).

<sup>1</sup>H NMR (500 MHz, CDCl<sub>3</sub>) δ 6.22 (m, 1H), 4.94 (m, 2H), 4.05 (m, 1H), 2.03 (m, 1H), 1.81 (m, 2H), 1.54 (m, 2H), 1.37 (m, 1H), 1.24 (m, 12 H), 1.01 (m, 3H), 0.83 (s, 9H).

<sup>13</sup>C NMR (126 MHz, CDCl<sub>3</sub>) δ 156.8, 156.0, 69.9, 69.7, 52.4, 46.9, 32.6, 30.1, 27.7, 26.3, 22.9, 22.2.

IR (film) 3298, 2943, 2867, 1731, 1467, 1373, 1307, 1226, 1180, 1110, 1033, 914, 763 cm<sup>-1</sup>.

HRMS: Calc'd C<sub>18</sub>H<sub>34</sub>N<sub>2</sub>O<sub>4</sub>Na (M+Na)<sup>+</sup> = 365.2416, found = 365.2410.

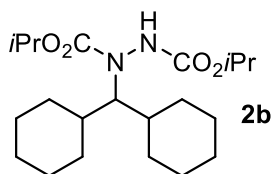

A mixture of rotamers.

<sup>1</sup>H NMR (500 MHz, CDCl<sub>3</sub>) δ 6.02 (m, 1H), 4.91 (m, 2H), 3.72 (m, 1H), 1.65 (m, 13H), 1.19 (m, 22H).

<sup>13</sup>C NMR (126 MHz, CDCl<sub>3</sub>) δ 157.3, 156.4, 70.2, 69.6, 66.4, 38.4, 36.6, 30.3, 29.9, 26.6, 22.8, 22.1.

IR (film) 3257, 2979, 2925, 2852, 1755, 1712, 1448, 1384, 1294, 1110, 1031, 912, 734 cm<sup>-1</sup>.

HRMS: Calc'd C<sub>21</sub>H<sub>39</sub>N<sub>2</sub>O<sub>4</sub>Na (M+Na)<sup>+</sup> = 383.2910, found = 383.2916.

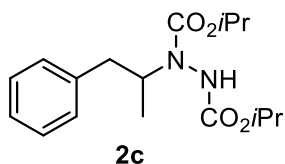

A mixture of rotamers.

<sup>1</sup>H NMR (500 MHz, CDCl<sub>3</sub>) δ 7.28 (m, 2H), 7.30 (m, 3H), 6.00 (m, 1H), 4.98 (p, *J* = 6.23 Hz, 1H), 4.86 (m, 1H), 4.61 (m, 1H), 2.83 (m, 2H), 1.21 (m, 15H).

<sup>13</sup>C NMR (126 MHz, CDCl<sub>3</sub>) δ 156.9, 155.5, 138.9, 129.1, 128.6, 126.5, 70.1, 69.8, 54.8, 40.7, 22.2, 22.1, 17.6.

IR (film) 3298, 2979, 2935, 1708, 1467, 1407, 1375, 1292, 1234, 1108, 1047, 746  $\text{cm}^{-1}$ .

HRMS: Calc'd  $\text{C}_{17}\text{H}_{26}\text{N}_2\text{O}_4\text{Na}$  ( $\text{M}+\text{Na}$ )<sup>+</sup> = 345.1790, found = 345.1777.

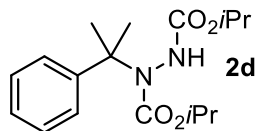

Purified on alumina instead of silica gel. A mixture of rotamers.

<sup>1</sup>H NMR (500 MHz,  $\text{CDCl}_3$ )  $\delta$  7.47 (m, 2H), 7.30 (t,  $J$  = 7.73 Hz, 2H), 7.20 (t,  $J$  = 7.25 Hz, 1H), 6.50 (m, 1H), 5.03 (m, 1H), 4.71 (m, 1H), 1.72 (br s, 3H), 1.60 (s, 3H), 1.33 (m, 6H), 0.95 (m, 6H).

<sup>13</sup>C NMR (126 MHz,  $\text{CDCl}_3$ )  $\delta$  157.3, 155.3, 148.6, 128.2, 126.3, 124.8, 70.3, 69.9, 64.1, 28.8, 27.9, 22.2, 21.7.

IR (film) 3299, 2981, 2937, 2358, 2331, 1712, 1521, 1496, 1467, 1384, 1321, 1261, 1180, 1108, 1029, 912, 763, 742, 700.

HRMS: Calc'd  $\text{C}_{17}\text{H}_{26}\text{N}_2\text{O}_4\text{Na}$  ( $\text{M}+\text{Na}$ )<sup>+</sup> = 345.1790, found = 345.1797.

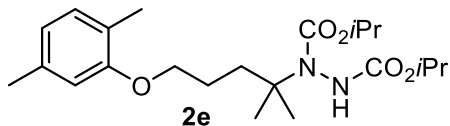

A mixture of rotamers.

<sup>1</sup>H NMR (500 MHz,  $\text{CDCl}_3$ )  $\delta$  7.01 (d,  $J$  = 7.42 Hz, 1H), 6.66 (d,  $J$  = 7.50 Hz, 1H), 6.63 (s, 1H), 6.30 (m, 1H), 4.94 (m, 2H), 3.94 (t,  $J$  = 6.27 Hz, 2H), 2.31 (s, 3H), 2.19 (s, 3H), 2.08 (m, 1H), 1.89 (m, 2H), 1.77 (m, 1H), 1.49 (m, 3H), 1.34 (m, 3H), 1.26 (m, 12H).

<sup>13</sup>C NMR (126 MHz,  $\text{CDCl}_3$ )  $\delta$  157.1, 156.9, 155.1, 136.6, 130.4, 123.6, 120.7, 112.1, 70.0, 69.6, 68.2, 62.4, 36.9, 27.0, 26.5, 24.9, 22.3, 21.6, 16.0.

IR (film) 3315, 2979, 2935, 1712, 1614, 1585, 1510, 1467, 1373, 1315, 1265, 1130, 1112, 1047, 912, 802  $\text{cm}^{-1}$ .

HRMS: Calc'd  $\text{C}_{22}\text{H}_{36}\text{N}_2\text{O}_5\text{Na}$  ( $\text{M}+\text{Na}$ )<sup>+</sup> = 431.2522, found = 431.2506.

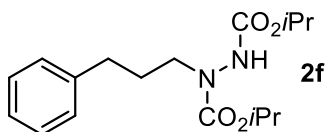

A mixture of rotamers.

$^1\text{H}$  NMR (500 MHz,  $\text{CDCl}_3$ )  $\delta$  7.28 (m, 2H), 7.20 (d,  $J = 7.35$  Hz, 3H), 6.30 (m, 1H), 4.96 (m, 2H), 3.55 (br s, 2H), 2.65 (t,  $J = 7.72$  Hz, 2H), 1.92 (p,  $J = 7.33$  Hz, 2H), 1.25 (m, 12H).

$^{13}\text{C}$  NMR (126 MHz,  $\text{CDCl}_3$ )  $\delta$  156.3, 156.0, 141.8, 128.5, 126.1, 70.2, 69.9, 49.8, 33.1, 29.9, 22.3, 22.2.

IR (film) 3299, 2981, 2933, 1712, 1467, 1413, 1375, 1274, 1180, 1108, 1029, 912, 742  $\text{cm}^{-1}$ .

HRMS: Calc'd  $\text{C}_{17}\text{H}_{26}\text{N}_2\text{O}_4\text{Na}$  ( $\text{M}+\text{Na}$ ) $^+$  = 345.1790, found = 345.1783.

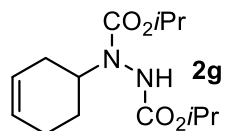

A mixture of rotamers.

$^1\text{H}$  NMR (500 MHz,  $\text{CDCl}_3$ )  $\delta$  6.18 (m, 1H), 5.61 (br s, 2H), 4.95 (br s, 2H), 4.30 (br s 1H), 2.18 (m, 4H), 1.77 (m, 2H), 1.25 (m, 12H).

$^{13}\text{C}$  NMR (126 MHz,  $\text{CDCl}_3$ )  $\delta$  157.0, 155.3, 126.5, 125.4, 70.1, 69.8, 53.4, 28.8, 26.5, 25.6, 22.3, 22.1.

IR (film) 3298, 2979, 2933, 1708, 1514, 1467, 1409, 1375, 1301, 1238, 1180, 1108, 1039, 914, 763  $\text{cm}^{-1}$ .

HRMS: Calc'd  $\text{C}_{14}\text{H}_{24}\text{N}_2\text{O}_4\text{Na}$  ( $\text{M}+\text{Na}$ ) $^+$  = 307.1634, found = 307.1639.

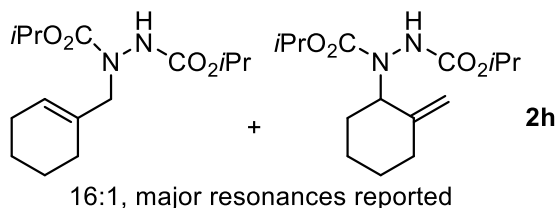

A mixture of rotamers.

$^1\text{H}$  NMR (500 MHz,  $\text{CDCl}_3$ )  $\delta$  6.32 (m, 1H), 5.54 (s, 1H), 4.93 (m, 2H), 3.97 (s, 2H), 2.00 (br s, 2H), 1.92 (br s, 2H), 1.59 (m, 4H), 1.25 (m, 12H).

$^{13}\text{C}$  NMR (126 MHz,  $\text{CDCl}_3$ )  $\delta$  156.3, 155.6, 133.0, 125.5, 70.2, 69.7, 56.3, 26.4, 25.2, 22.7, 22.4, 22.2, 22.1.

IR (film) 3301, 2979, 2931, 1708, 1411, 1373, 1263, 1217, 1178, 1108, 1035, 912, 742  $\text{cm}^{-1}$ .

HRMS: Calc'd  $\text{C}_{15}\text{H}_{26}\text{N}_2\text{O}_4\text{Na}$  ( $\text{M}+\text{Na}$ ) $^+$  = 321.1790, found = 321.1796.

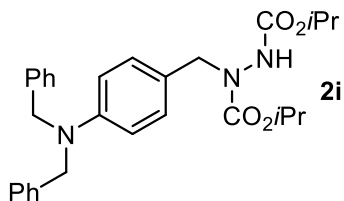

A mixture of rotamers.

$^1\text{H}$  NMR (500 MHz,  $\text{CDCl}_3$ )  $\delta$  7.33 (t,  $J = 7.44$  Hz, 4H), 7.25 (m, 6H), 7.08 (d,  $J = 8.11$  Hz, 2H), 6.68 (d,  $J = 8.27$  Hz, 2H), 6.26 (m, 1H), 4.96 (m, 2H), 4.60 (m, 6H), 1.25 (m, 12H).

$^{13}\text{C}$  NMR (126 MHz,  $\text{CDCl}_3$ )  $\delta$  156.0, 155.8, 148.8, 138.5, 128.8, 127.0, 126.7, 112.3, 70.1, 69.6, 54.4, 52.9, 22.2, 22.1.

IR (film) 3299, 2979, 2935, 2250, 1712, 1614, 1585, 1452, 1384, 1261, 1218, 1108, 1029, 956, 912, 804, 732  $\text{cm}^{-1}$ .

HRMS: Calc'd  $\text{C}_{29}\text{H}_{35}\text{N}_3\text{O}_4\text{Na}$  ( $\text{M}+\text{Na}$ ) $^+$  = 512.2525, found = 512.2527.

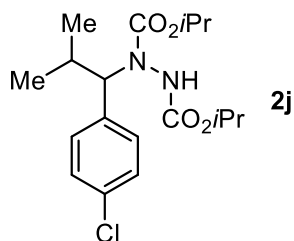

Purified on alumina. A mixture of rotamers.

$^1\text{H}$  NMR (500 MHz,  $\text{CDCl}_3$ )  $\delta$  7.28 (m, 4H), 5.83 (m, 1H), 4.73 (m, 3H), 2.33 (br s, 1H), 1.22 (m, 12H), 0.94 (m, 2H), 0.69 (m, 4H).

$^{13}\text{C}$  NMR (126 MHz,  $\text{CDCl}_3$ )  $\delta$  156.6, 155.9, 136.9, 133.7, 130.5, 130.4, 128.7, 128.6, 70.3, 69.8, 66.9, 28.6, 22.2, 22.1, 21.0, 20.5, 20.2, 20.0.

IR (film) 3286, 2979, 1712, 1492, 1469, 1404, 1384, 1317, 1282, 1226, 1180, 1145, 1108, 1033, 966, 912, 746  $\text{cm}^{-1}$ .

HRMS: Calc'd  $\text{C}_{18}\text{H}_{27}\text{ClN}_2\text{O}_4\text{Na}$  ( $\text{M}+\text{Na}$ ) $^+$  = 393.1557, found = 393.1561.

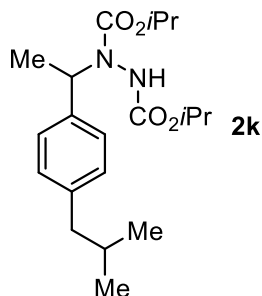

Purified on alumina. A mixture of rotamers.

$^1\text{H}$  NMR (500 MHz,  $\text{CDCl}_3$ )  $\delta$  7.23 (m, 2H), 7.10 (d,  $J = 7.82$  Hz, 2H), 5.86 (m, 1H), 5.48 (m, 1H), 4.96 (m, 2H), 2.45 (d,  $J = 7.16$  Hz, 2H), 1.85 (dh,  $J = 13.5, 6.79$  Hz, 1H), 1.54 (m, 3H), 1.25 (m, 12H), 0.90 (d,  $J = 6.62$  Hz, 6H).

$^{13}\text{C}$  NMR (126 MHz,  $\text{CDCl}_3$ )  $\delta$  156.5, 155.6, 141.2, 138.2, 129.3, 127.1, 70.2, 69.7, 55.1, 45.2, 30.4, 22.5, 22.3, 22.2, 22.1, 22.0, 16.7.

IR (film) 3294, 2979, 1714, 1514, 1469, 1384, 1303, 1230, 1108  $\text{cm}^{-1}$ .

HRMS: Calc'd  $\text{C}_{20}\text{H}_{32}\text{N}_2\text{O}_4\text{Na}$  ( $\text{M}+\text{Na}$ ) $^+$  = 387.2260, found = 387.2252.

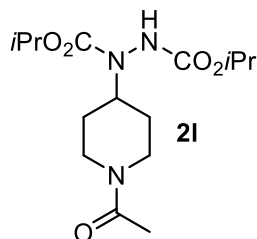

A mixture of rotamers.

$^1\text{H}$  NMR (500 MHz,  $\text{CDCl}_3$ )  $\delta$  6.34 (m, 1H), 4.93 (m, 2H), 4.70 (m, 1H), 4.19 (m, 1H), 3.84 (m, 1H), 3.10 (t,  $J = 12.6$  Hz, 1H), 2.55 (t,  $J = 13.1$  Hz, 1H), 2.08 (s, 3H), 1.70 (m, 4H), 1.25 (m, 12H).

$^{13}\text{C}$  NMR (126 MHz,  $\text{CDCl}_3$ )  $\delta$  169.0, 156.7, 155.1, 70.4, 70.0, 54.7, 45.7, 40.9, 30.0, 29.0, 22.2, 22.1, 21.6.

IR (film) 3284, 2935, 2869, 1731, 1631, 1454, 1411, 1373, 1303, 1249, 1108, 103, 912, 732  $\text{cm}^{-1}$ .

HRMS: Calc'd  $\text{C}_{15}\text{H}_{27}\text{N}_3\text{O}_5\text{Na}$  ( $\text{M}+\text{Na}$ ) $^+$  = 352.1848, found = 352.1849.

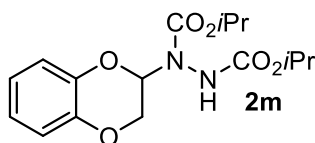

A mixture of rotamers.



$^1\text{H}$  NMR (500 MHz,  $\text{CDCl}_3$ )  $\delta$  6.88 (m, 4H), 6.49 (m, 1H), 6.06 (m, 1H), 5.00 (m, 2H), 4.42 (m, 1H), 4.03 (t,  $J$  = 9.64 Hz, 1H), 1.28 (m, 12H).

$^{13}\text{C}$  NMR (126 MHz,  $\text{CDCl}_3$ )  $\delta$  154.5, 142.9, 142.5, 122.1, 121.9, 117.4, 117.2, 79.2, 72.0, 70.4, 64.6, 22.1.

IR (film) 3307, 2981, 2937, 1731, 1595, 1494, 1409, 1377, 1303, 1267, 1244, 1182, 1108, 1076, 962, 912, 869, 748  $\text{cm}^{-1}$ .

HRMS: Calc'd  $\text{C}_{16}\text{H}_{22}\text{N}_2\text{O}_6\text{Na}$  ( $\text{M}+\text{Na}$ ) $^+$  = 361.1376, found = 361.1383.

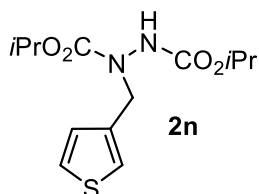

Purified on alumina. A mixture of rotamers.

$^1\text{H}$  NMR (500 MHz,  $\text{CDCl}_3$ )  $\delta$  7.28 (dd,  $J$  = 4.96, 2.92 Hz, 1H), 7.18 (br s, 1H), 7.04 (br s, 1H), 6.29 (m, 1H), 4.95 (m, 2H), 4.67 (br s, 2H), 1.25 (m, 12H).

$^{13}\text{C}$  NMR (126 MHz,  $\text{CDCl}_3$ )  $\delta$  155.9, 137.5, 128.1, 126.3, 123.7, 70.5, 69.9, 49.3, 48.4, 22.2, 22.1.

IR (film) 3298, 2979, 1712, 1502, 1407, 1384, 1269, 1238, 1207, 1180, 1107, 1039, 912, 742  $\text{cm}^{-1}$ .

HRMS: Calc'd  $\text{C}_{13}\text{H}_{20}\text{N}_2\text{O}_4\text{SNa}$  ( $\text{M}+\text{Na}$ ) $^+$  = 323.1042, found = 323.1038.

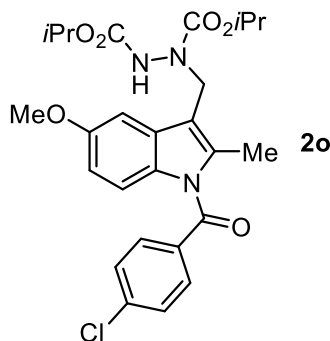

Purified on alumina. A mixture of rotamers.

$^1\text{H}$  NMR (500 MHz,  $\text{CDCl}_3$ )  $\delta$  7.63 (d,  $J$  = 8.46 Hz, 2H), 7.46 (d,  $J$  = 8.33 Hz, 2H), 7.06 (br m, 1H), 6.84 (m, 1H), 6.66 (dd,  $J$  = 9.09, 2.51 Hz, 1H), 6.25 (br m, 1H), 4.95 (m, 4H), 3.81 (s, 3H), 2.38 (s, 3H), 1.23 (m, 12H).

$^{13}\text{C}$  NMR (126 MHz,  $\text{CDCl}_3$ )  $\delta$  168.5, 156.2, 156.0, 155.8, 139.5, 137.7, 133.8, 131.3, 130.9, 130.6, 129.3, 115.0, 114.7, 114.4, 112.3, 111.8, 101.6, 101.4, 70.4, 69.9, 55.8, 43.1, 42.7, 42.3, 22.3, 22.1, 13.2.

IR (film) 3305, 2981, 2935, 2252, 1731, 1712, 1693, 1591, 1479, 1373, 1323, 1238, 1180, 1108, 1043, 912  $\text{cm}^{-1}$ .

HRMS: Calc'd  $\text{C}_{26}\text{H}_{30}\text{ClN}_3\text{O}_6\text{Na}$  ( $\text{M}+\text{Na}$ )<sup>+</sup> = 538.1721, found = 538.1725.

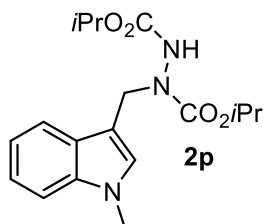

Purified on alumina instead of silica gel. A mixture of rotamers.

<sup>1</sup>H NMR (500 MHz,  $\text{CDCl}_3$ )  $\delta$  7.69 (br s, 1H), 7.32 (d,  $J$  = 8.21 Hz, 1H), 7.26 (m, 1H), 7.14 (m, 1H), 7.05 (br s, 1H), 6.23 (m, 1H), 4.94 (m, 4H), 3.78 (s, 3H), 1.26 (m, 12H).

<sup>13</sup>C NMR (126 MHz,  $\text{CDCl}_3$ )  $\delta$  156.0, 155.7, 137.2, 129.3, 127.6, 122.1, 119.6, 109.7, 109.4, 70.1, 69.7, 44.5, 32.9, 22.3, 22.1.

IR (film) 3299, 2981, 2935, 1731, 1714, 1693, 1469, 1328, 1269, 1220, 1108, 912, 742  $\text{cm}^{-1}$ .

HRMS: Calc'd  $\text{C}_{18}\text{H}_{25}\text{O}_4\text{N}_3\text{Na}$  ( $\text{M}+\text{Na}$ )<sup>+</sup> = 370.1743, found = 370.1730.

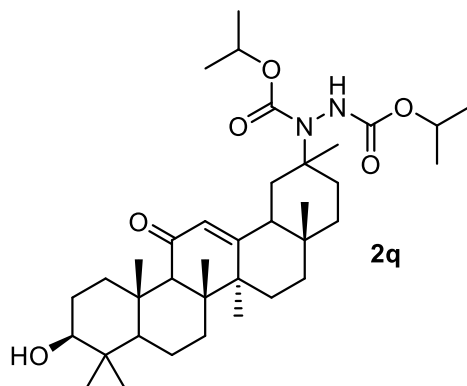

A mixture of rotamers and diastereomers.

<sup>1</sup>H NMR (500 MHz,  $\text{CDCl}_3$ )  $\delta$  6.37 (m, 1H), 5.57 (m, 1H), 4.90 (m, 2H), 3.20 (d,  $J$  = 6.46 Hz, 1H), 2.75 (d,  $J$  = 12.8 Hz, 1H), 2.32 (m, 2H), 2.11 (m, 3H), 1.67 (m, 7H), 1.37 (m, 9H), 1.23 (m, 14H), 1.11 (s, 6H), 0.98 (m, 5H), 0.84 (s, 3H), 0.78 (s, 3H), 0.67 (d,  $J$  = 11.6 Hz, 1H).

<sup>13</sup>C NMR (126 MHz,  $\text{CDCl}_3$ )  $\delta$  200.45, 200.34, 200.31, 200.25, 200.21, 169.53, 169.43, 169.24, 169.04, 168.77, 168.66, 157.18, 157.05, 157.03, 156.94, 155.64, 155.03, 154.70, 154.58, 128.61, 128.57, 128.53, 128.41, 78.83, 70.07, 69.99, 69.92, 69.82, 69.76, 69.69, 69.63, 69.46, 69.37, 63.14, 63.03, 62.30, 61.93, 61.90, 61.86, 55.02, 55.00, 48.56, 48.46, 48.37, 47.56, 46.41, 45.53, 45.46, 45.43, 43.45, 43.41, 43.35, 42.85, 42.08, 40.27, 40.02, 39.92, 39.25, 39.23, 37.41, 37.25, 37.19, 37.16, 37.13, 36.66, 36.03, 32.95,

32.91, 32.84, 32.55, 32.32, 32.29, 31.83, 31.80, 31.33, 30.35, 30.11, 29.83, 28.72, 28.53, 28.36, 28.24, 27.40, 26.80, 26.74, 26.62, 26.59, 26.54, 26.48, 26.45, 26.18, 23.53, 23.35, 23.29, 23.18, 22.34, 22.31, 22.29, 22.23, 22.19, 22.12, 22.11, 22.09, 22.06, 20.82, 20.75, 20.63, 20.51, 18.85, 18.83, 18.80, 18.79, 17.61, 16.50, 16.49, 16.47, 15.75.

IR (film) 3498, 3303, 2979, 2993, 2252, 1730, 1697, 1650, 1508, 1467, 1454, 1384, 1373, 1319, 1261, 1180, 1110, 1037, 995, 912, 732, 646.

HRMS: Calc'd  $C_{37}H_{60}N_2O_6Na$  ( $M+Na$ )<sup>+</sup> = 651.4349, found = 651.4343.

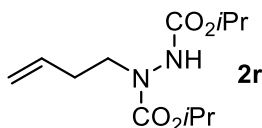

A mixture of rotamers.

<sup>1</sup>H NMR (500 MHz, CDCl<sub>3</sub>) δ 6.32 (m, 1H), 5.79 (dq, *J* = 16.9, 7.80 Hz, 1H), 5.07 (m, 2H), 4.96 (m, 2H), 3.59 (br s, 2H), 2.35 (q, *J* = 7.08 Hz, 2H), 1.27 (d, *J* = 6.34 Hz, 12H).

<sup>13</sup>C NMR (126 MHz, CDCl<sub>3</sub>) δ 156.5, 135.5, 117.0, 70.2, 69.9, 49.1, 32.0, 22.3, 22.2.

IR (film) 3301, 2981, 2935, 1714, 1415, 1386, 1265, 1211, 1108, 742 cm<sup>-1</sup>.

HRMS: Calc'd  $C_{12}H_{22}N_2O_4Na$  ( $M+Na$ )<sup>+</sup> = 281.1477, found = 281.1472.

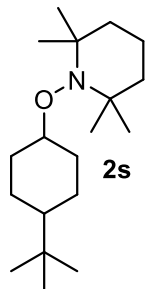

1.0:1.2 d.r.

$^1\text{H}$  NMR (500 MHz,  $\text{CDCl}_3$ )  $\delta$  3.85 (p,  $J$  = 2.99 Hz, 0.45 H), 3.53 (tt,  $J$  = 11.2, 4.11 Hz, 0.55 H), 2.17 (m, 2H), 1.78 (m, 1H), 1.49 (m, 6H), 1.32 (m, 3H), 1.13 (m, 13H), 0.98 (m, 2H), 0.87 (s, 4H), 0.83 (s, 5H).

$^{13}\text{C}$  NMR (126 MHz,  $\text{CDCl}_3$ )  $\delta$  82.6, 77.7, 59.9, 59.8, 48.0, 47.7, 40.5, 40.4, 34.7, 34.4, 33.2, 32.7, 32.4, 31.4, 27.9, 27.8, 26.4, 22.2, 20.5, 17.5, 17.3.

IR (film) 2939, 1458, 1365, 1242, 1132, 1049, 958, 914.

HRMS: Calc'd  $\text{C}_{19}\text{H}_{38}\text{NO}$  ( $\text{M}+\text{H}$ ) $^+$  = 296.2953, found = 296.2961.

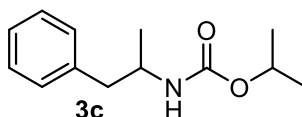

$^1\text{H}$  NMR (500 MHz,  $\text{CDCl}_3$ )  $\delta$  7.30 (m, 2H), 7.23 (m, 1H), 7.19 (m, 2H), 4.90 (hept,  $J$  = 6.28 Hz, 1H), 4.48 (br s, 1H), 3.97 (br s, 1H), 2.86 (dd,  $J$  = 14.0, 5.25 Hz, 1H), 2.68 (dd,  $J$  = 13.4, 7.31 Hz, 1H), 1.22 (d,  $J$  = 6.28 Hz, 6H), 1.11 (d,  $J$  = 6.63 Hz, 3H).

$^{13}\text{C}$  NMR (126 MHz,  $\text{CDCl}_3$ )  $\delta$  155.7, 138.2, 129.6, 128.5, 126.5, 67.9, 47.9, 43.1, 22.4, 20.3.

IR (film) 3328, 2977, 2931, 1693, 1531, 1454, 1373, 1251, 1180, 1114, 1045, 700  $\text{cm}^{-1}$ .

HRMS: Calc'd  $\text{C}_{13}\text{H}_{19}\text{NO}_2\text{Na}$  ( $\text{M}+\text{Na}$ ) $^+$  = 244.1313, found = 244.1312.

## 4. References

<sup>1</sup> Lang, S. B.; O'Nele, K. M.; Tunge, J. A. *J. Am. Chem. Soc.* **2014**, 13606.

<sup>2</sup> Chen, X.; Liu, X.; Mohr, J. T. *Org. Lett.* **2016**, 18, 716-719.

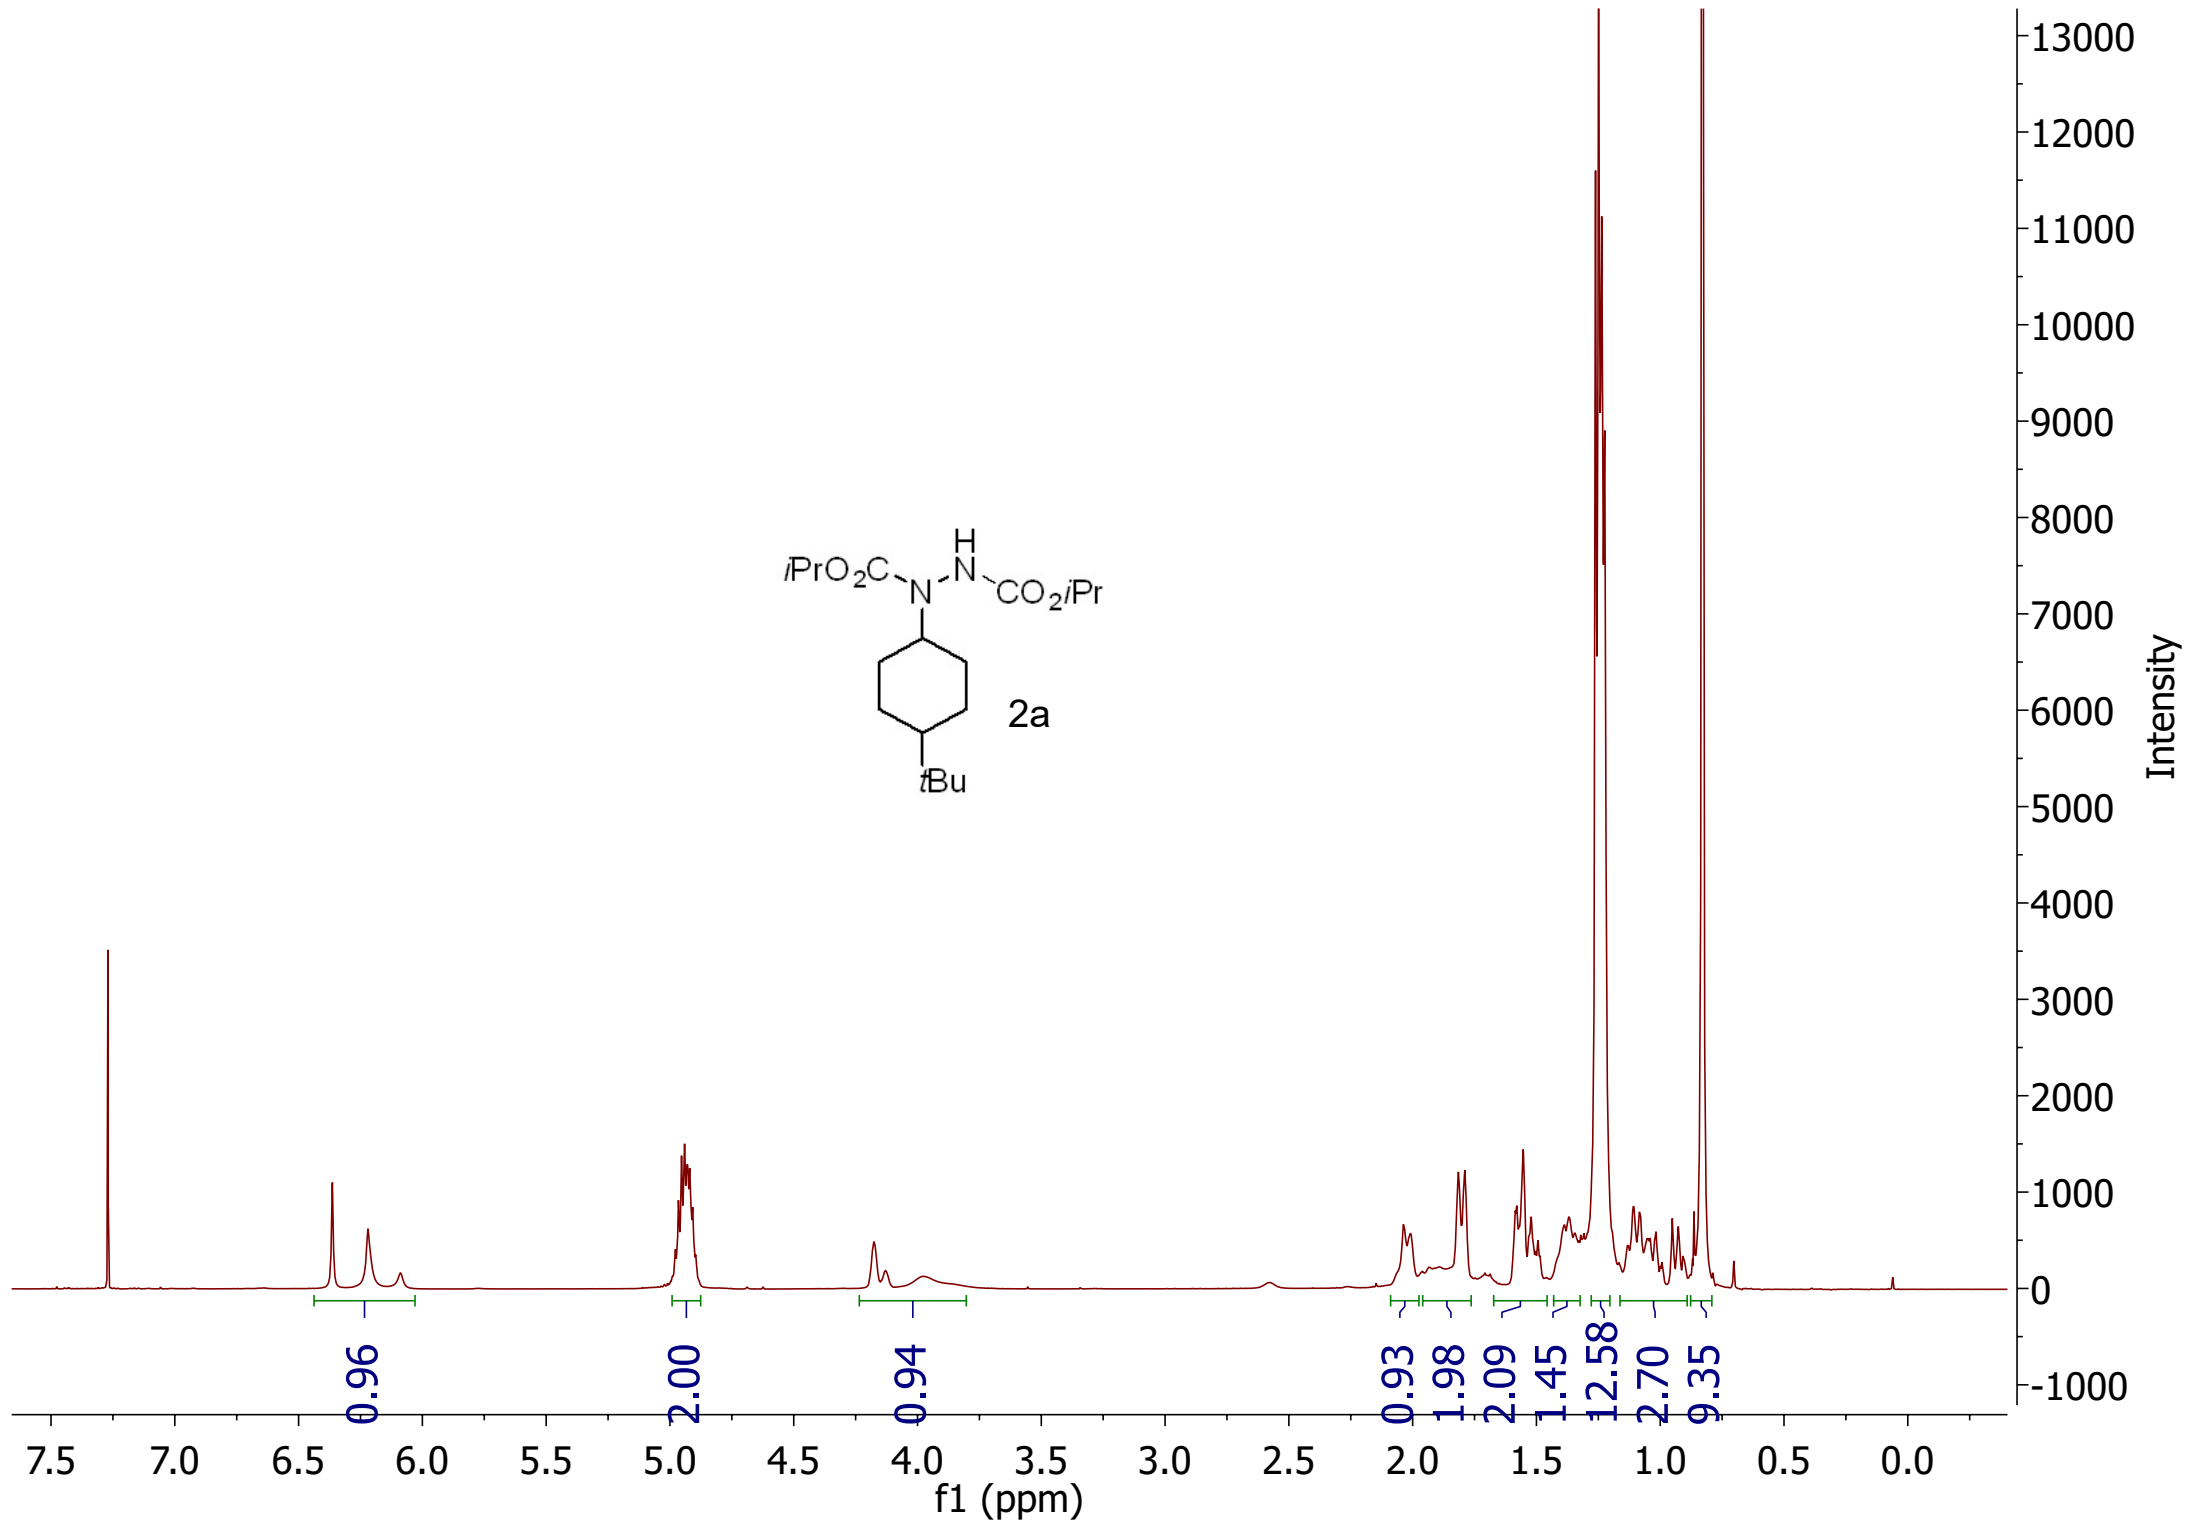

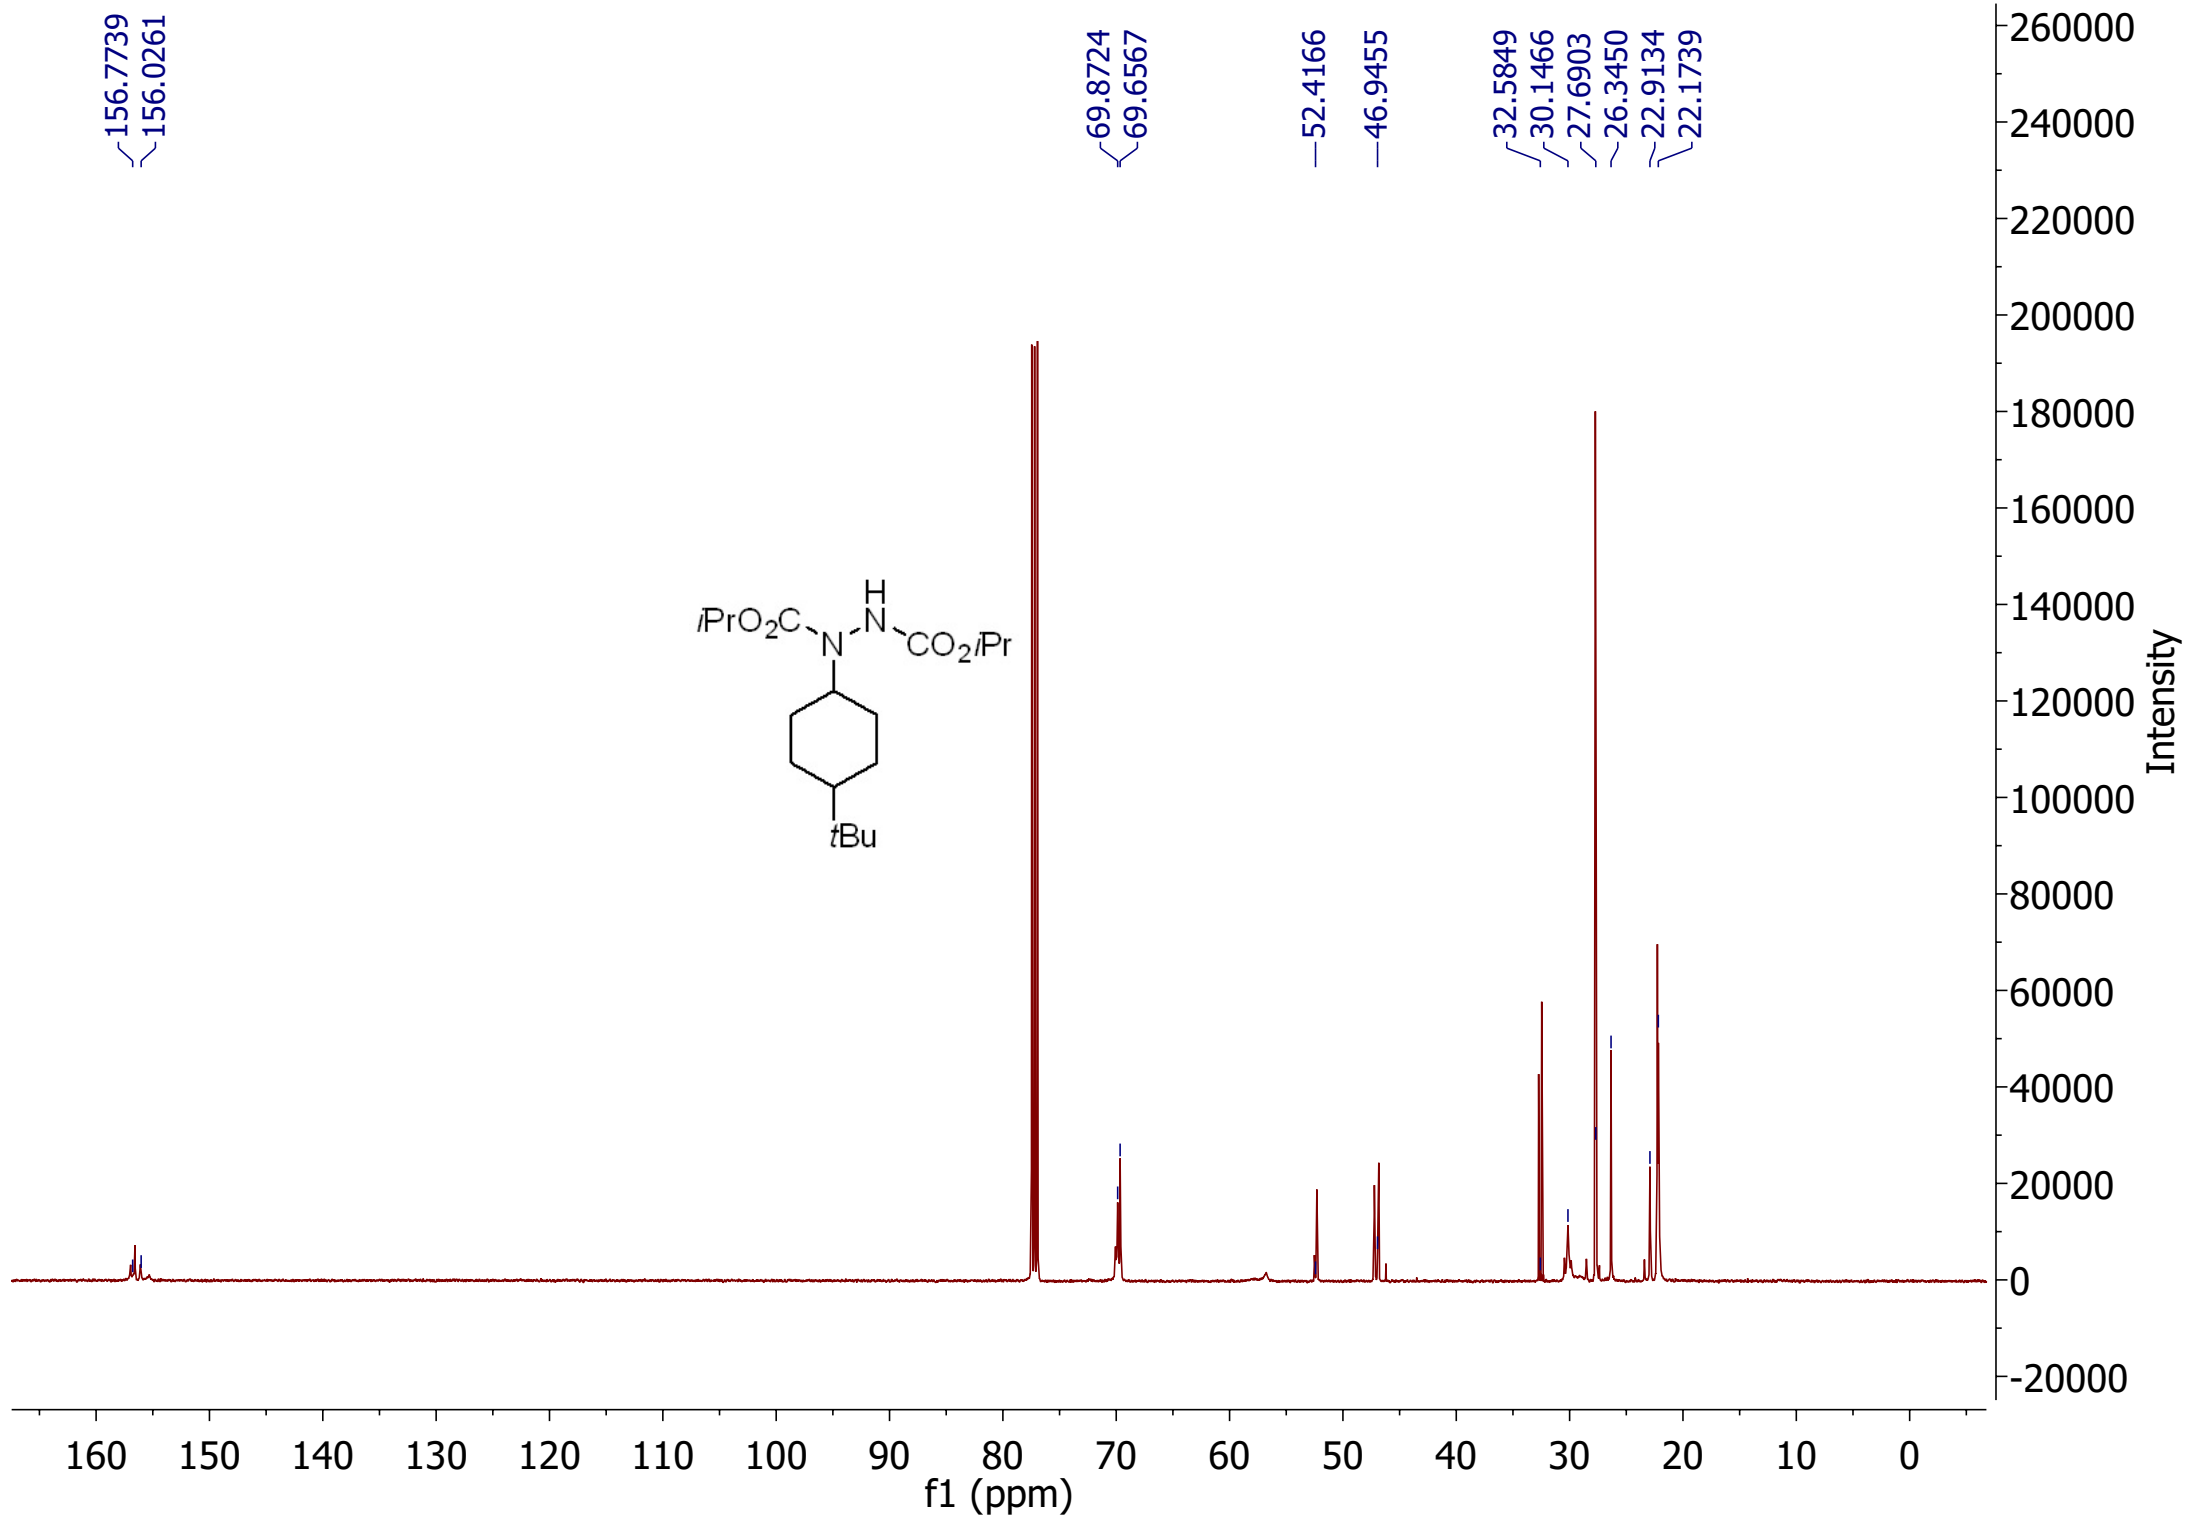

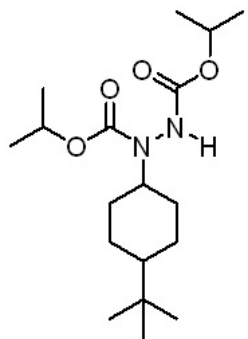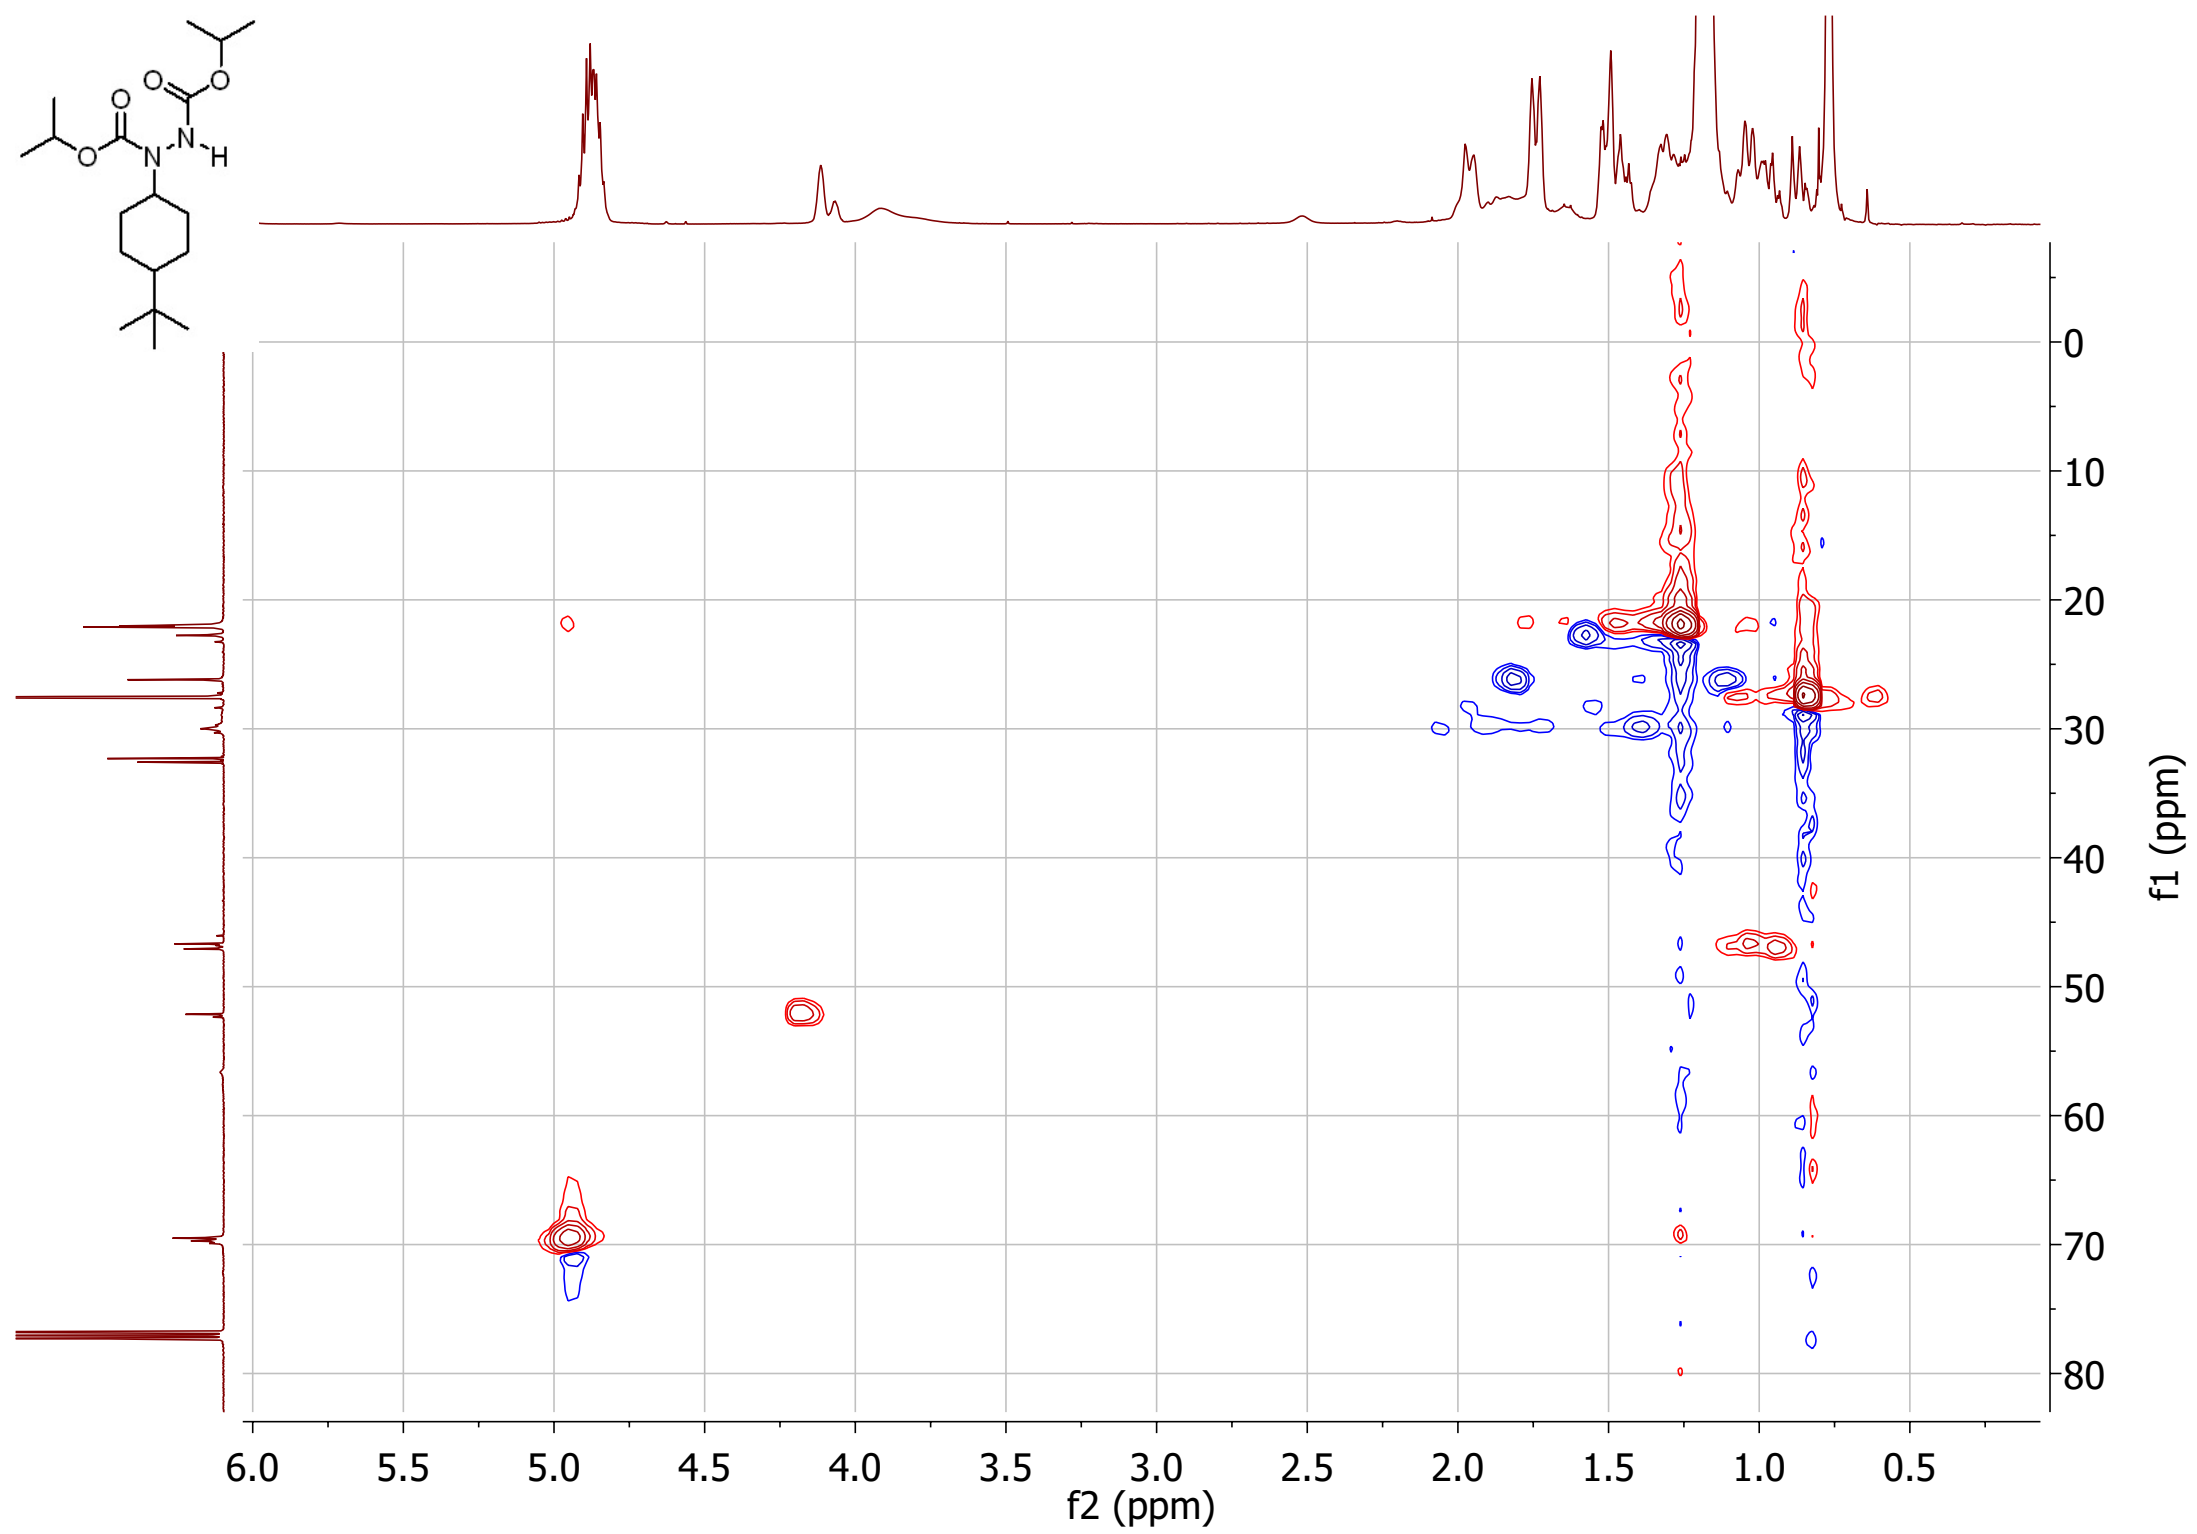

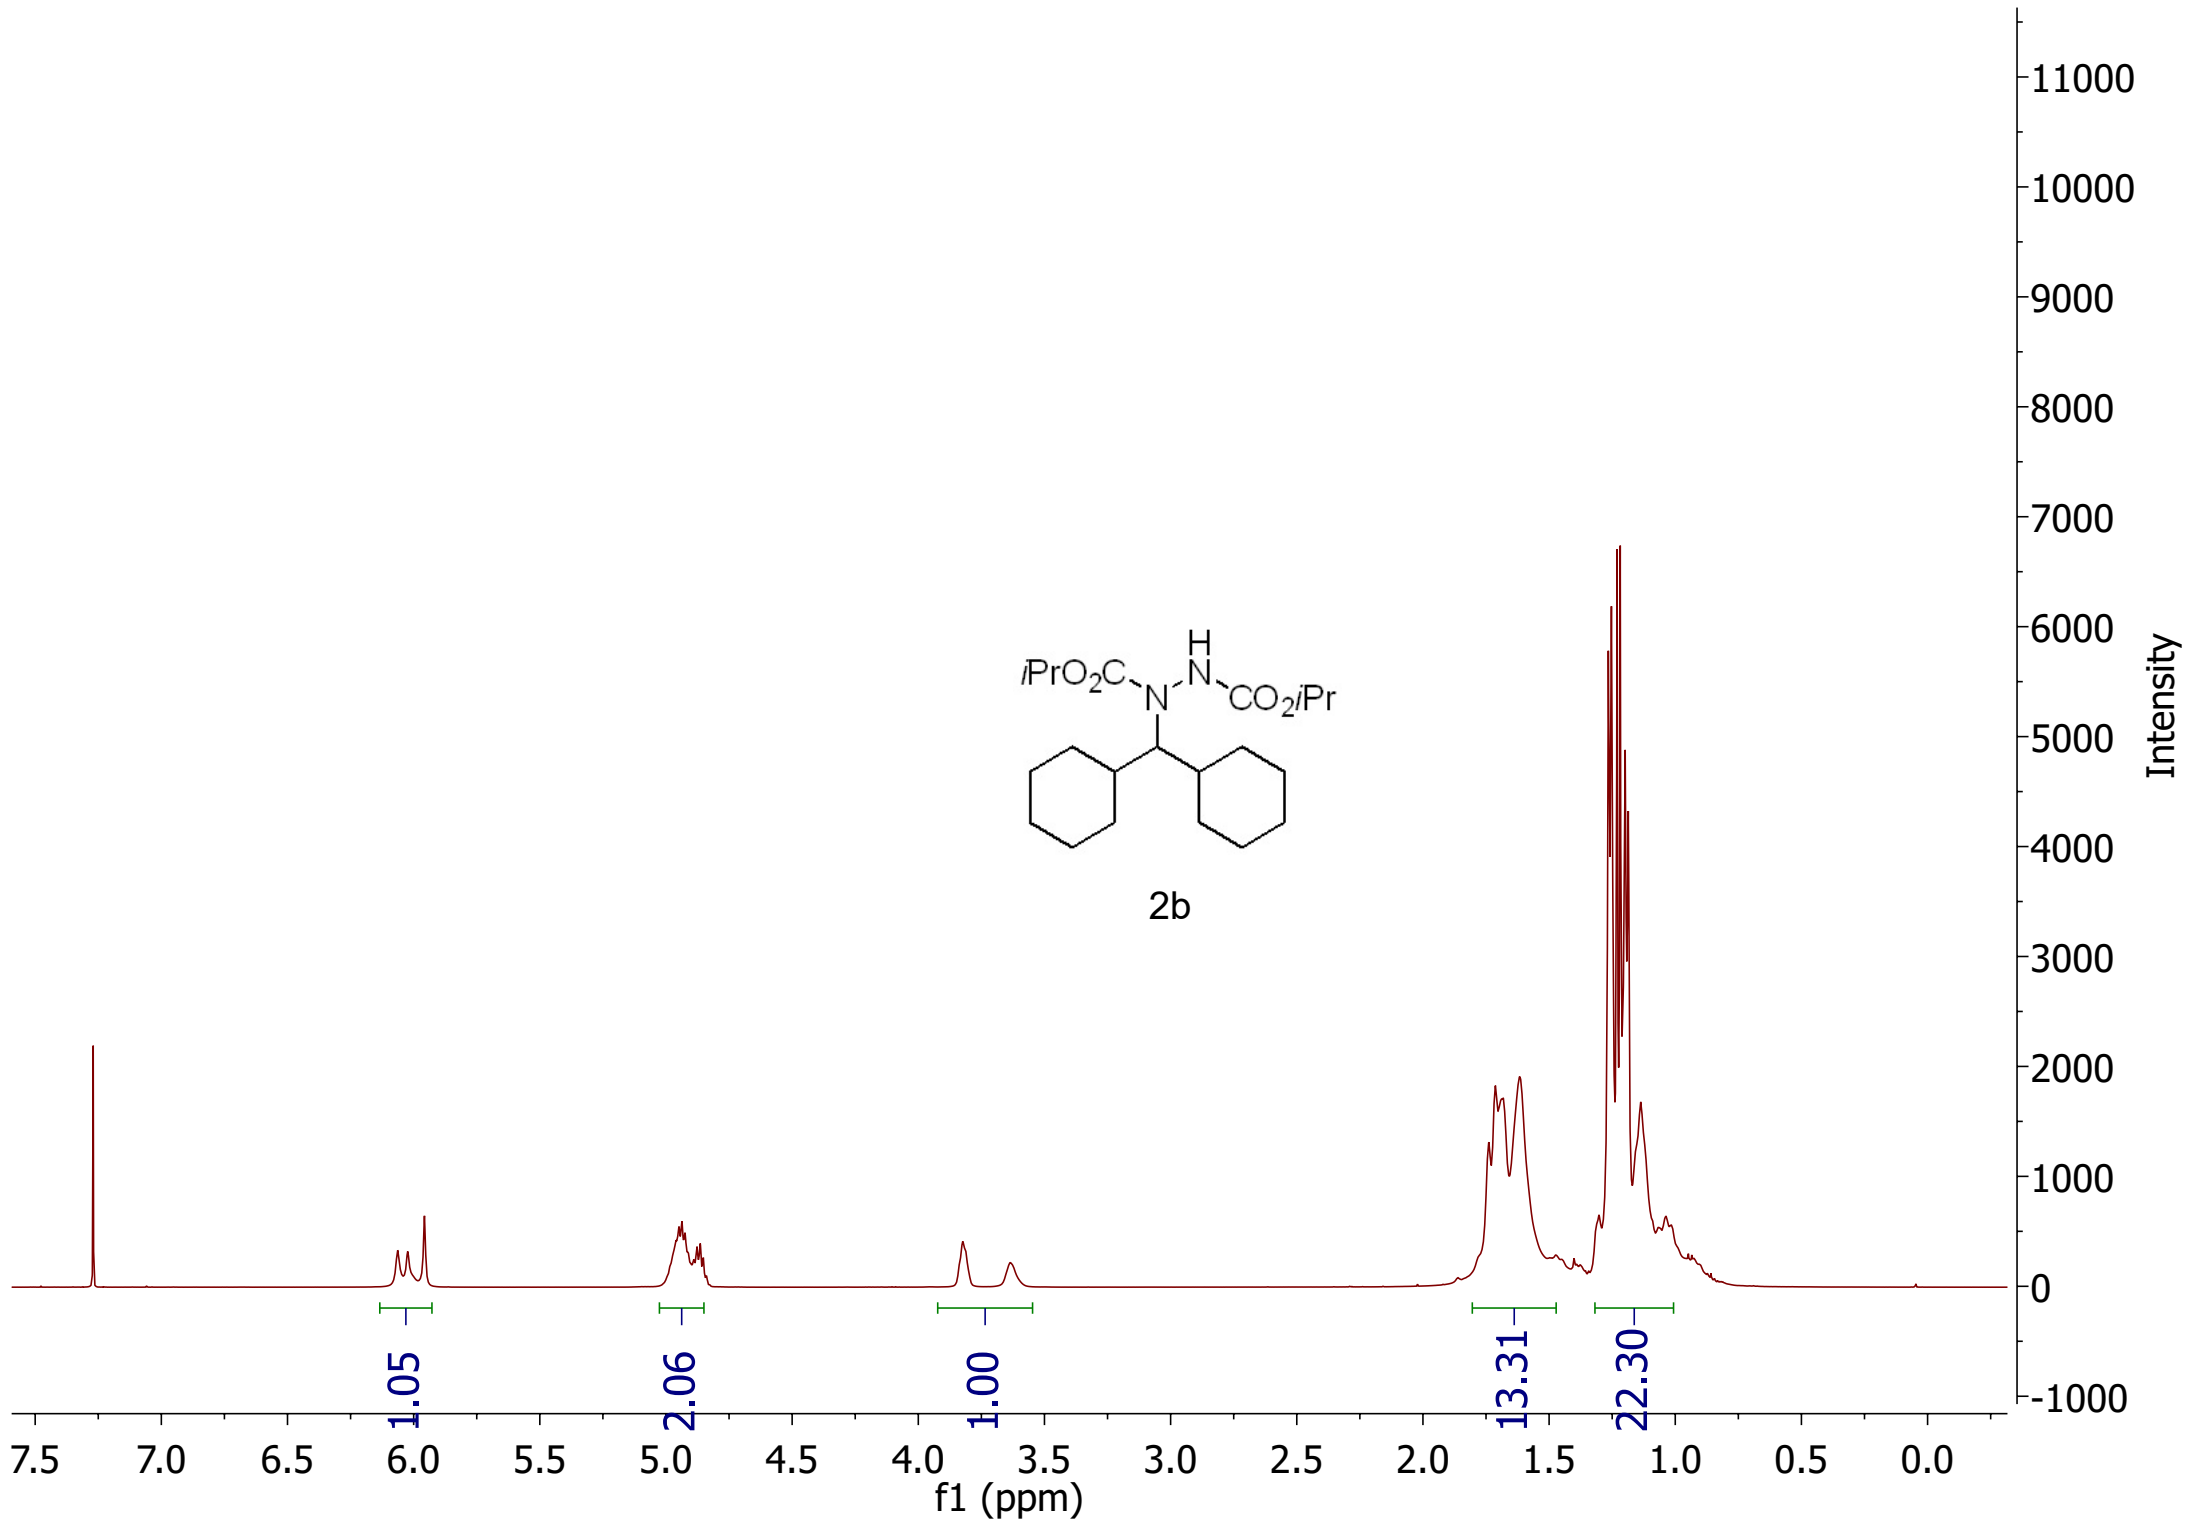



157.2546  
156.3826

70.2033  
69.5679  
66.3968

38.3822  
36.5745  
30.2931  
29.8728  
26.6090  
22.1813  
22.1115

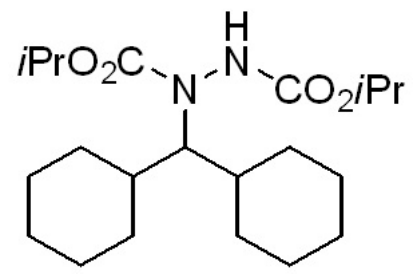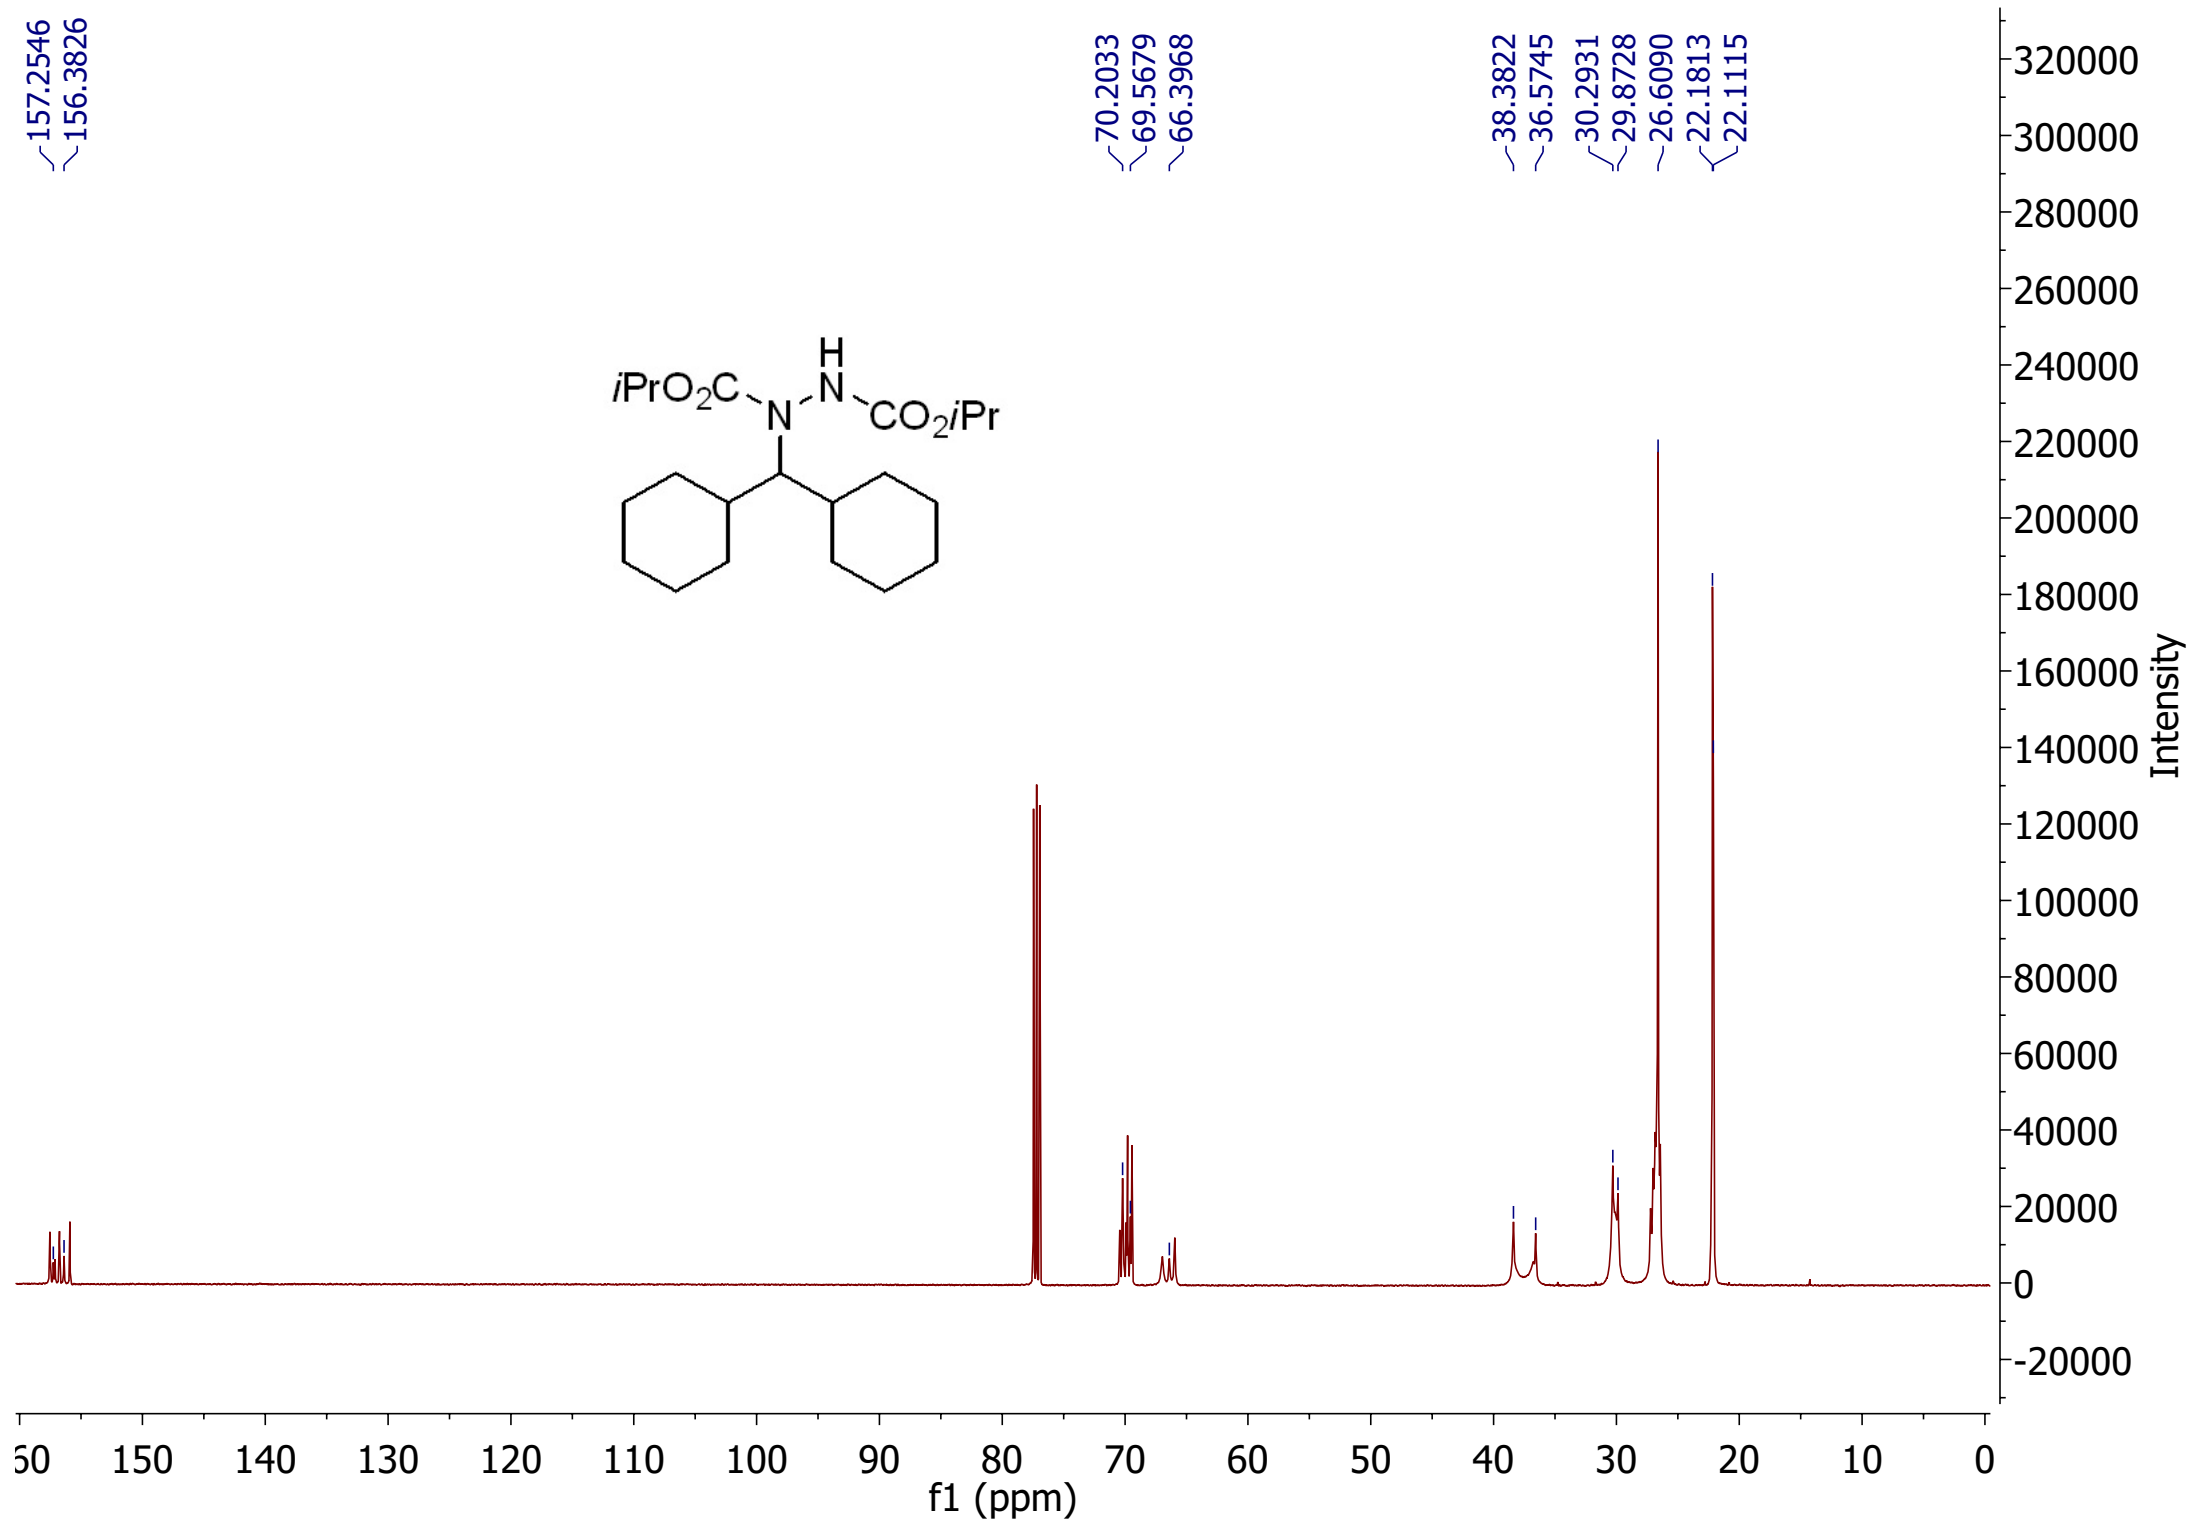

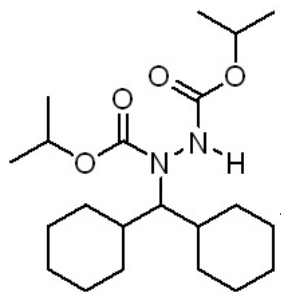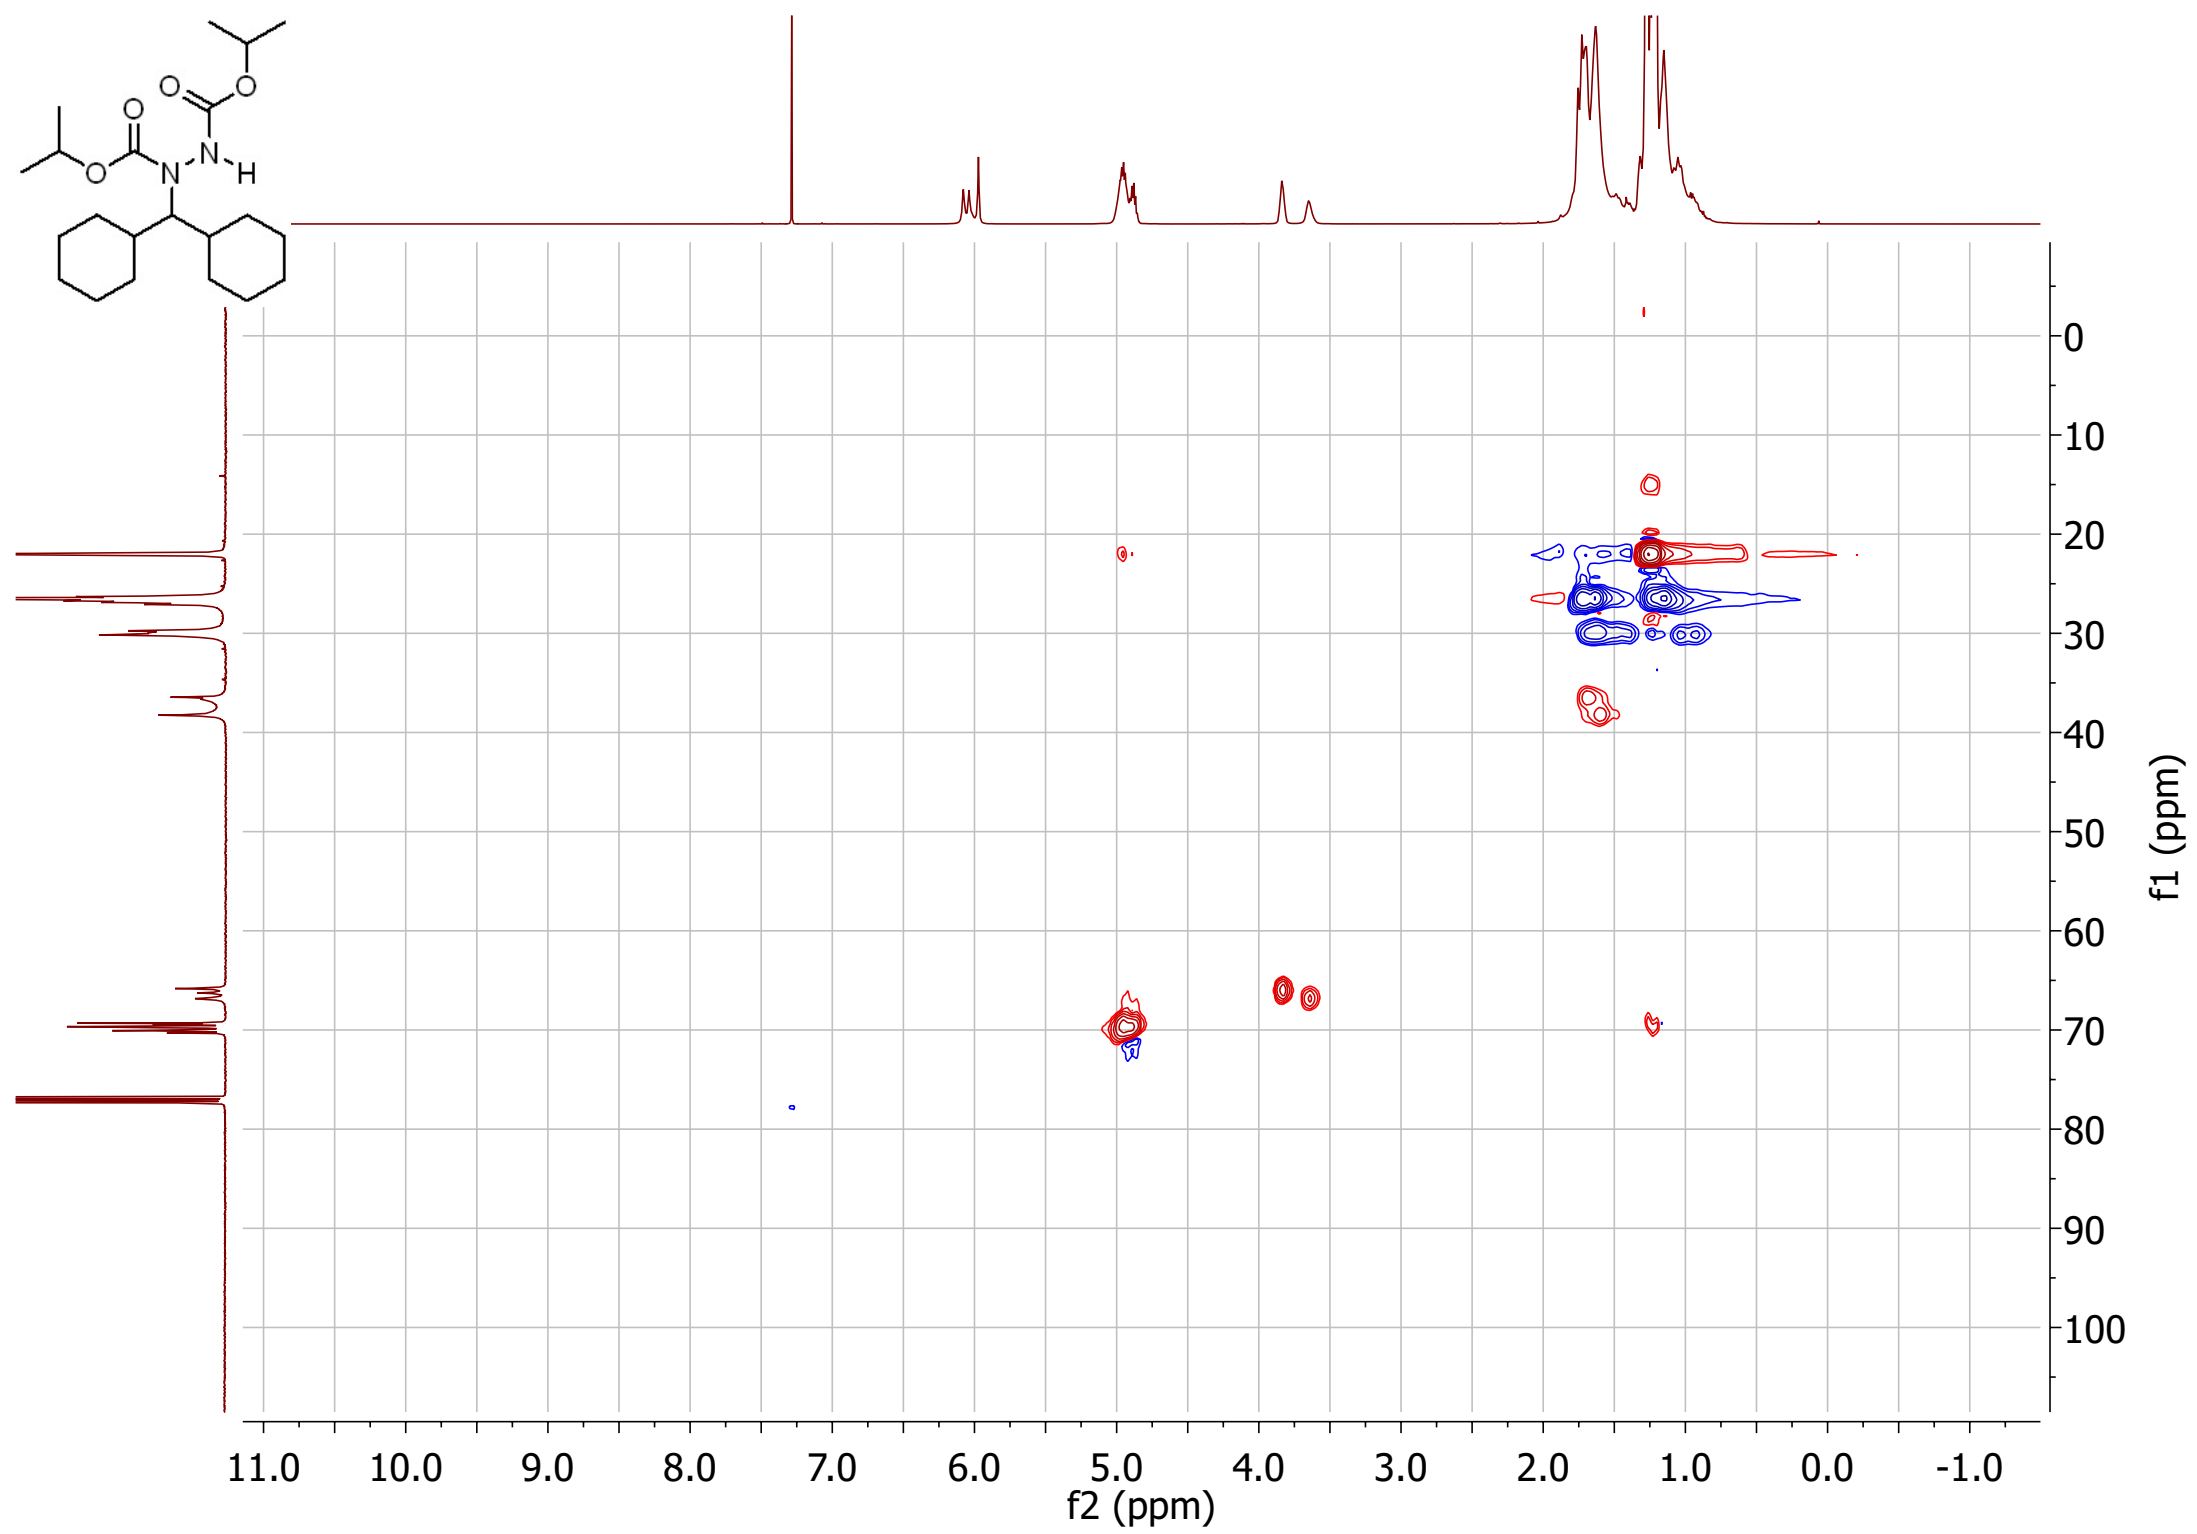

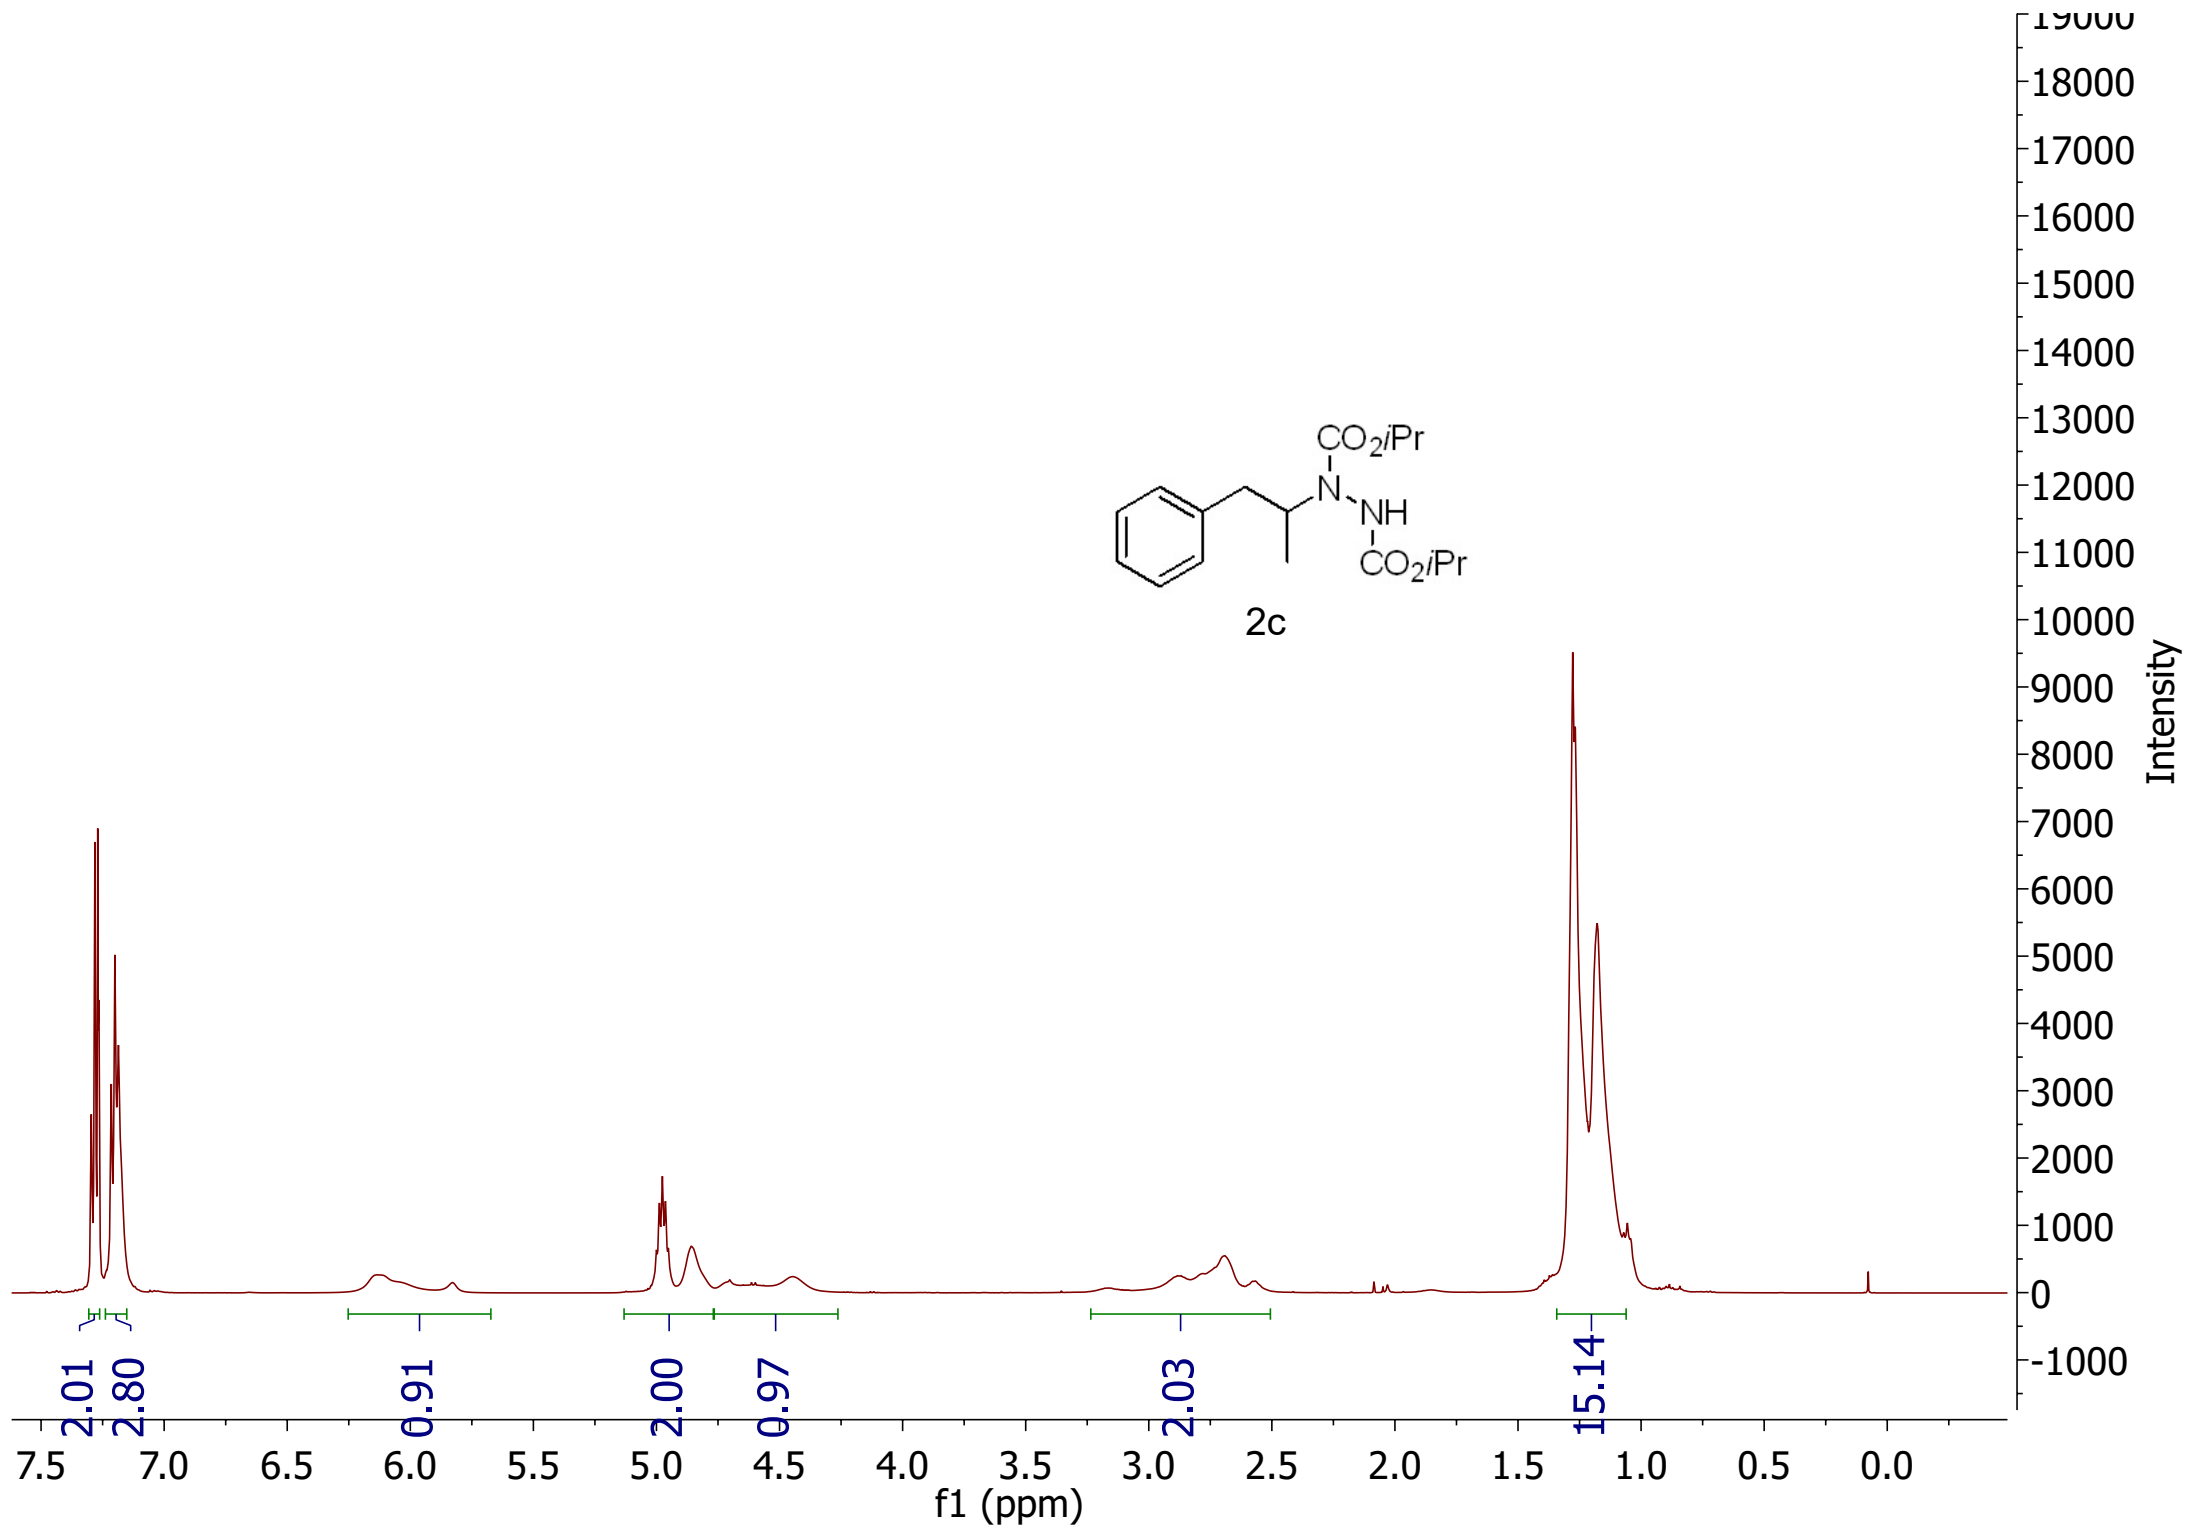

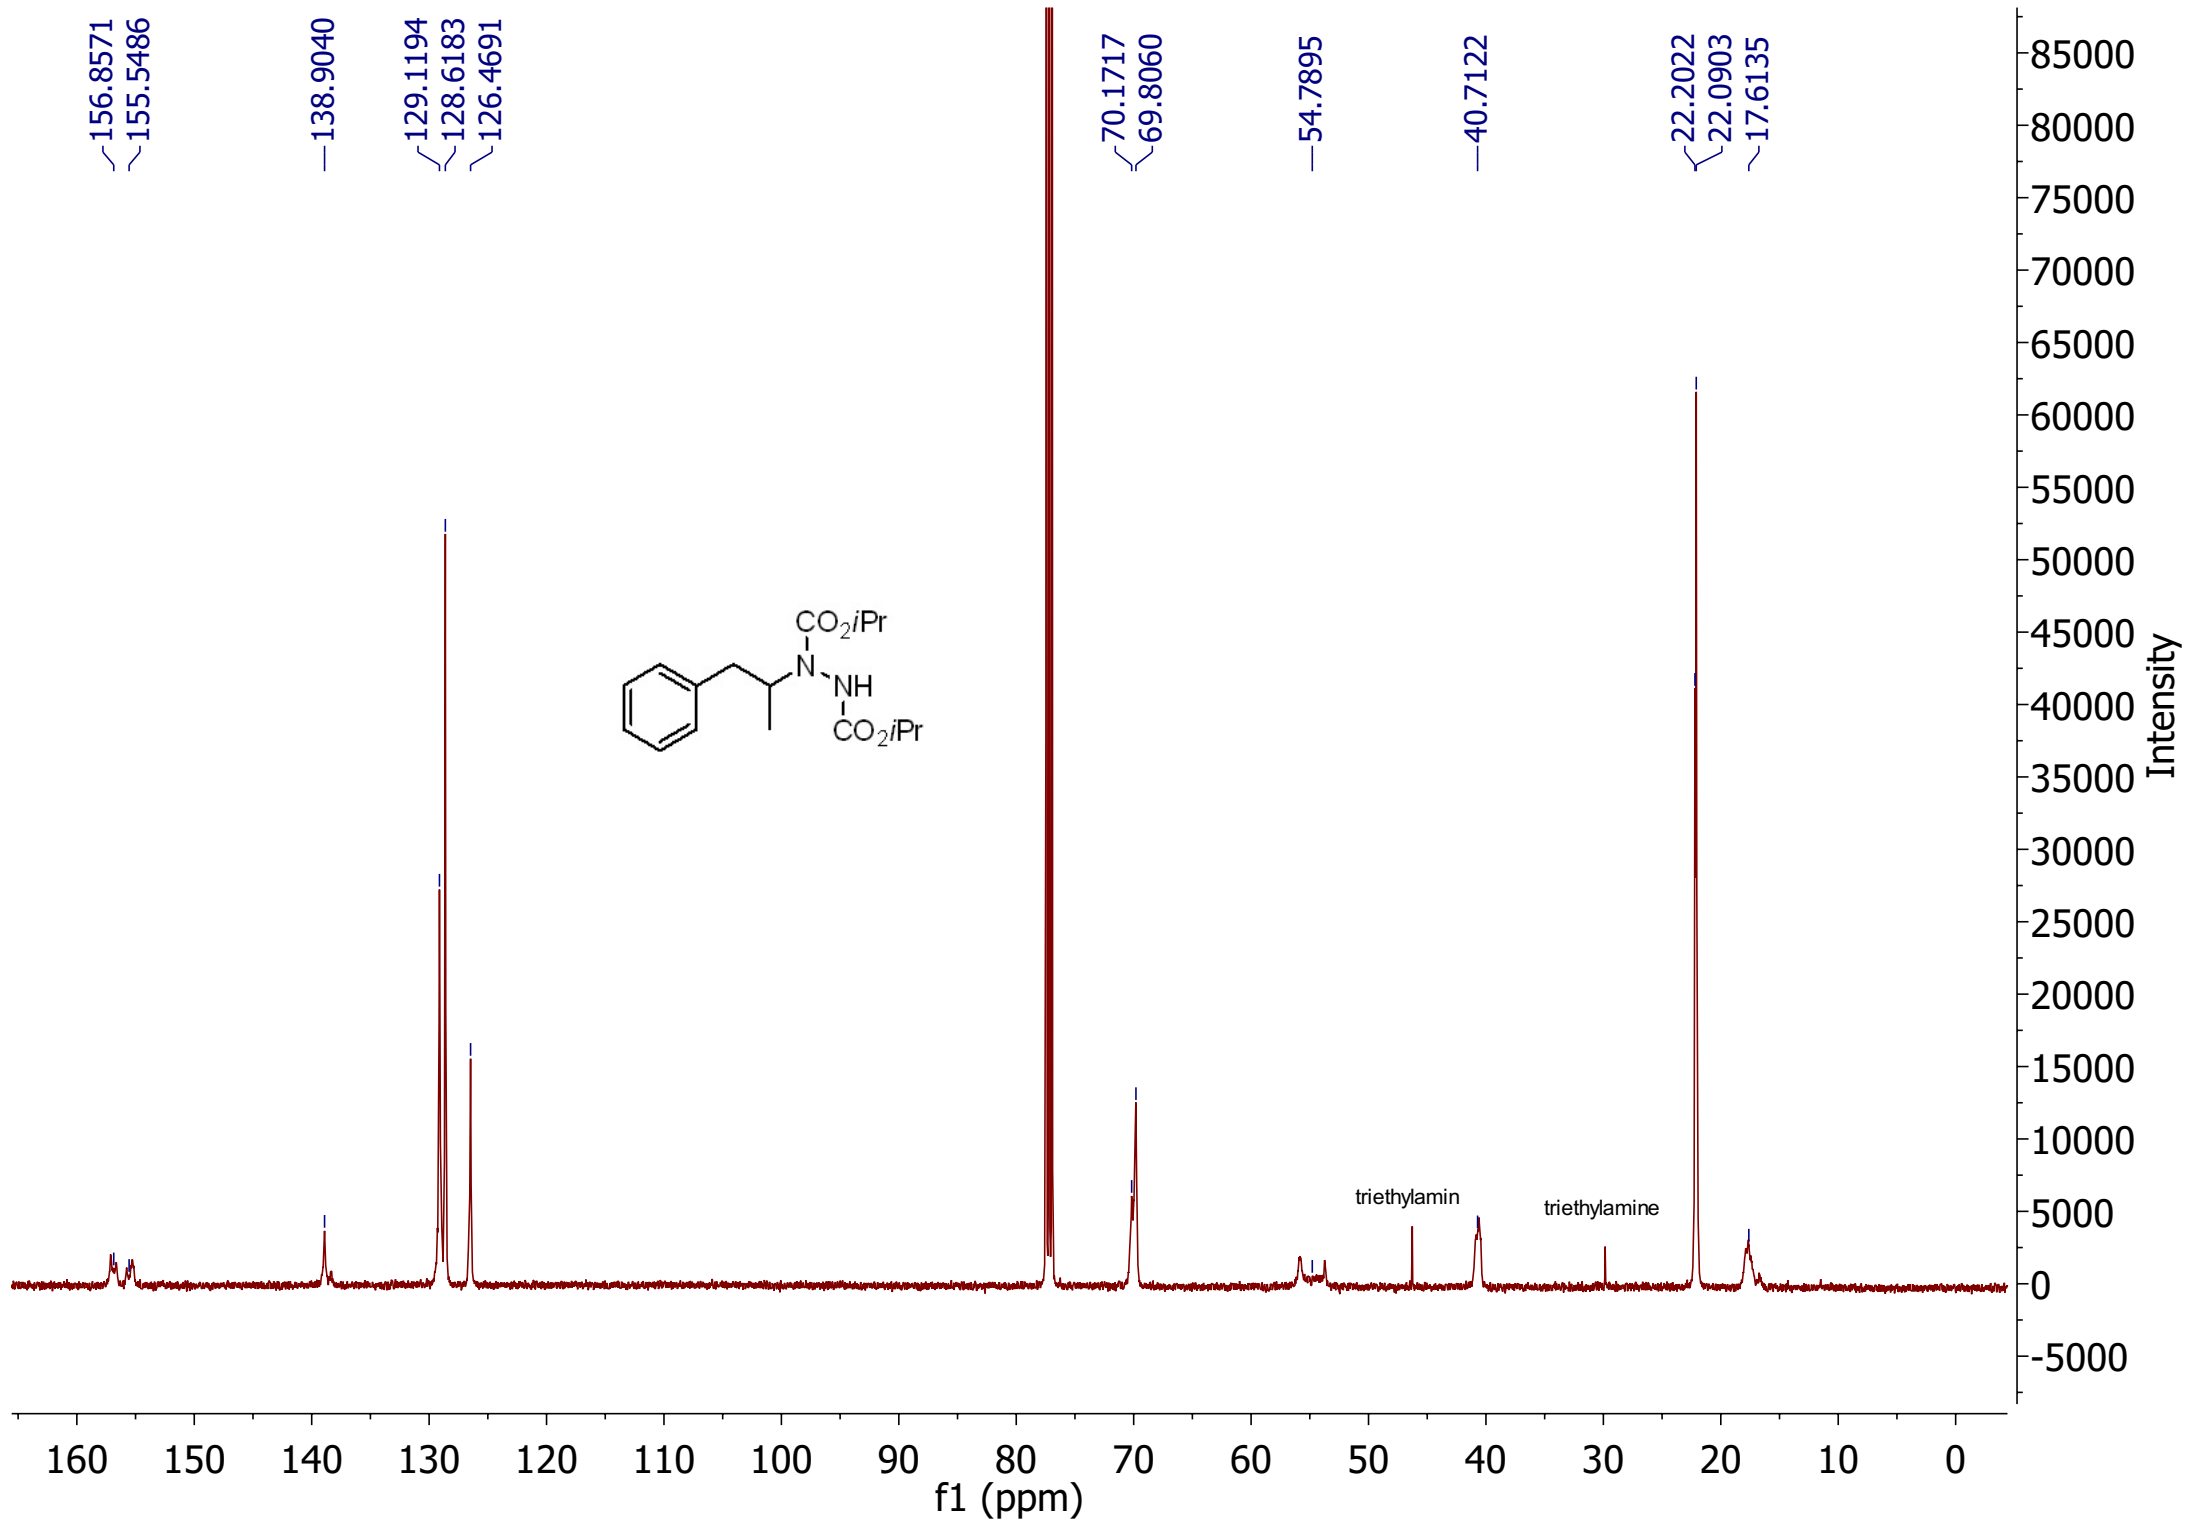

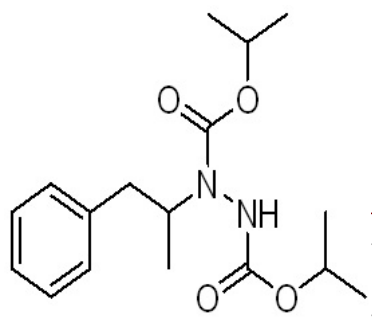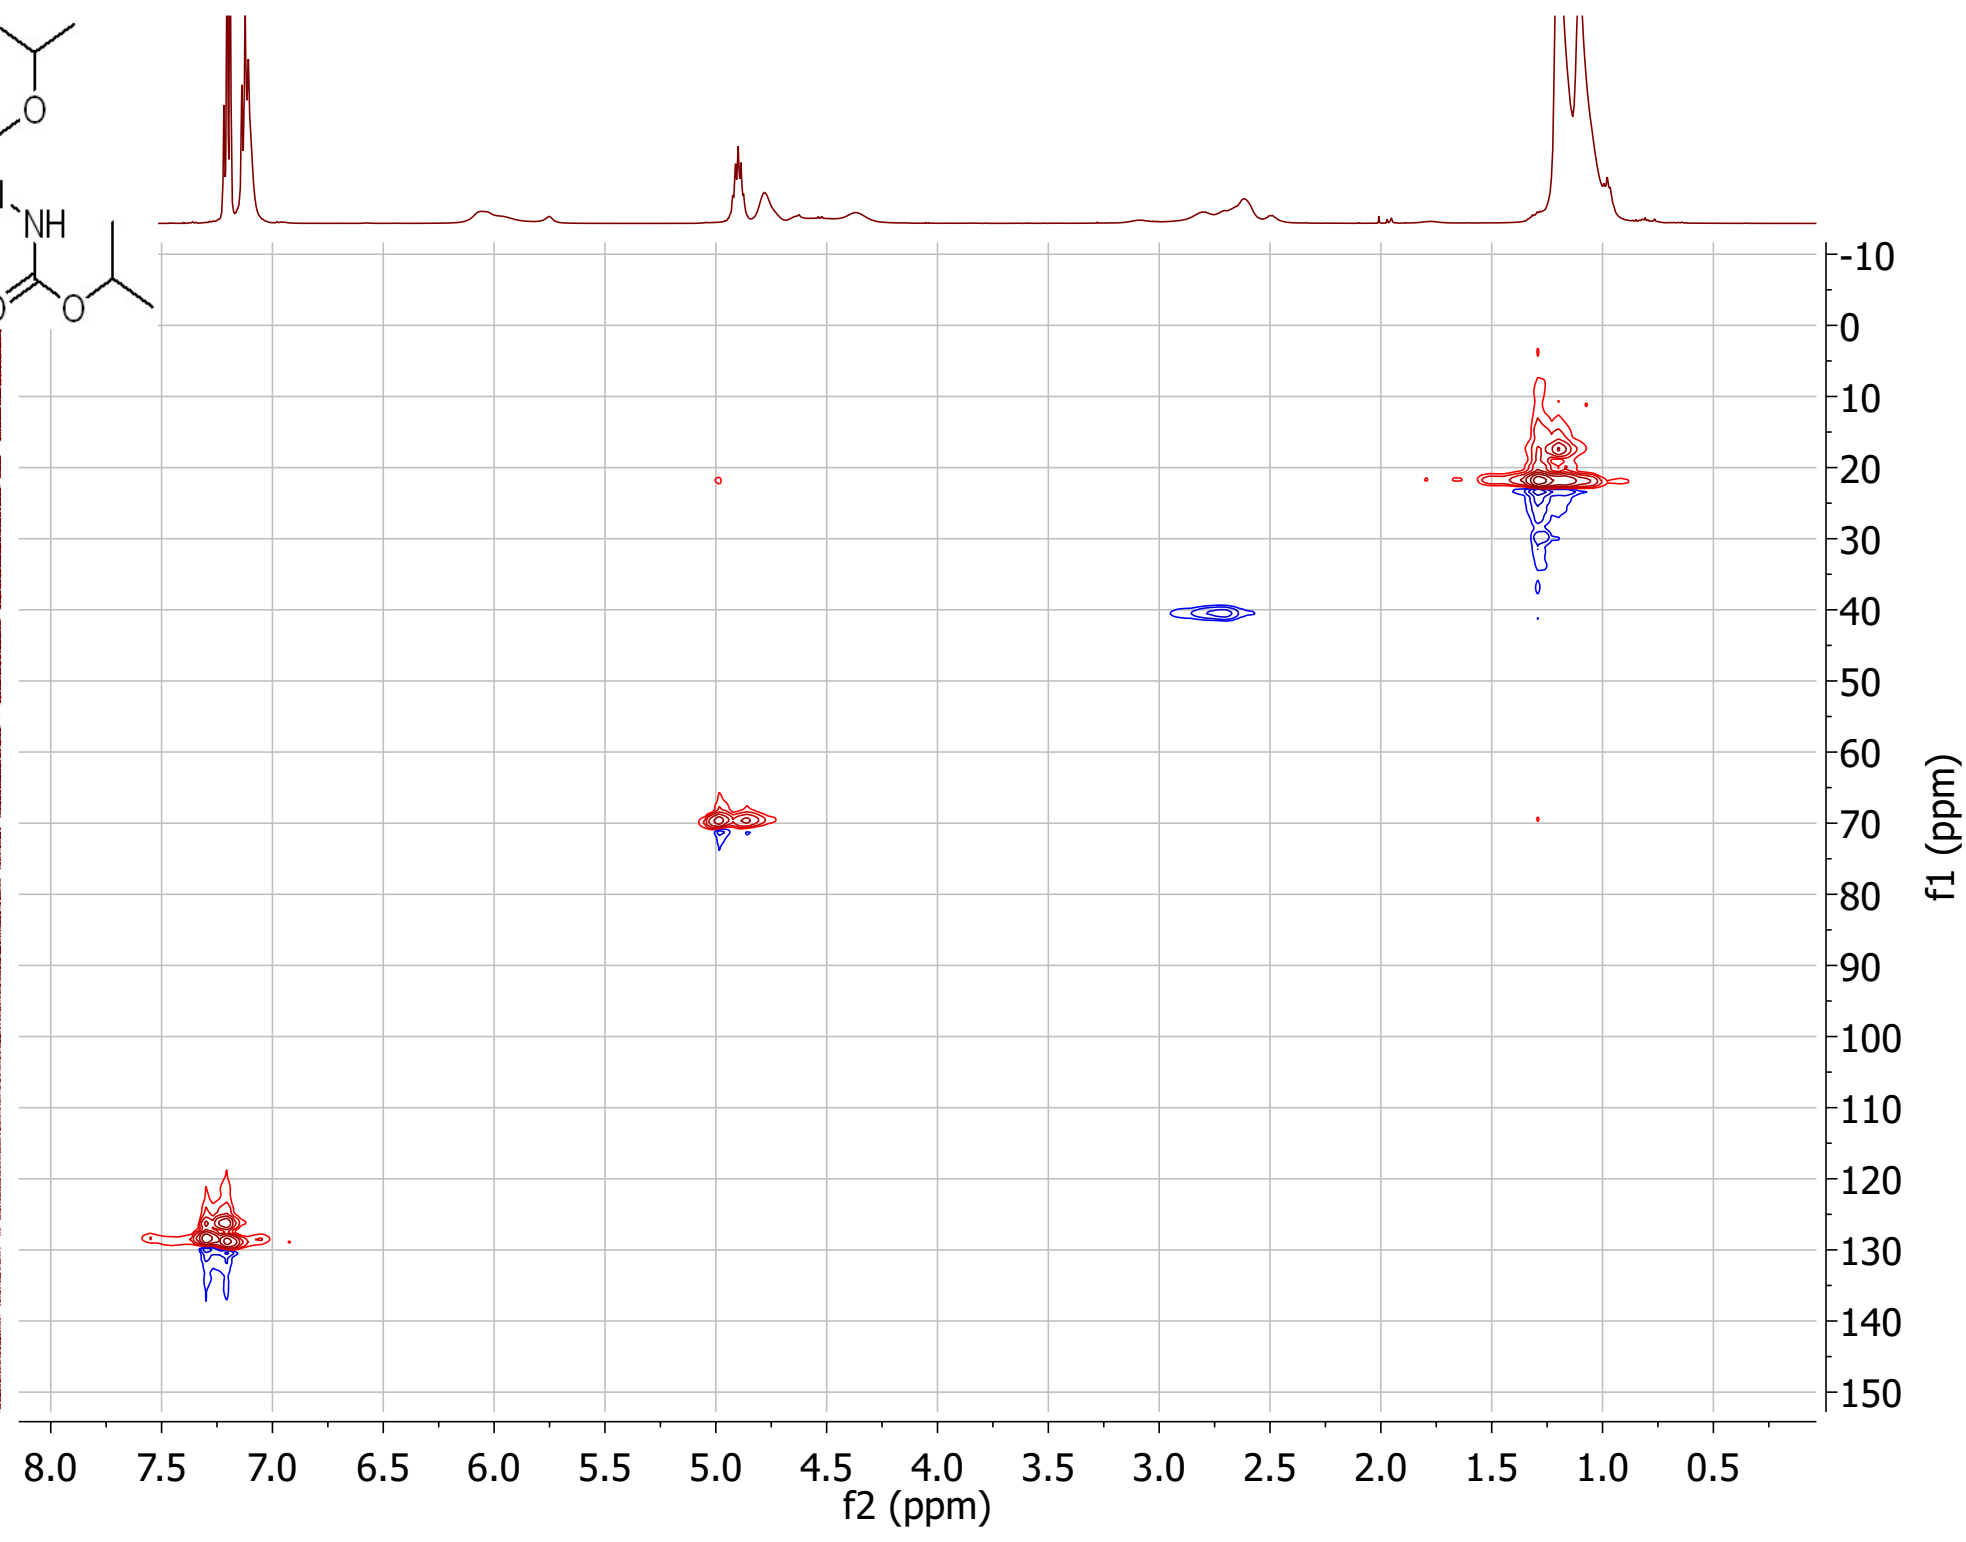

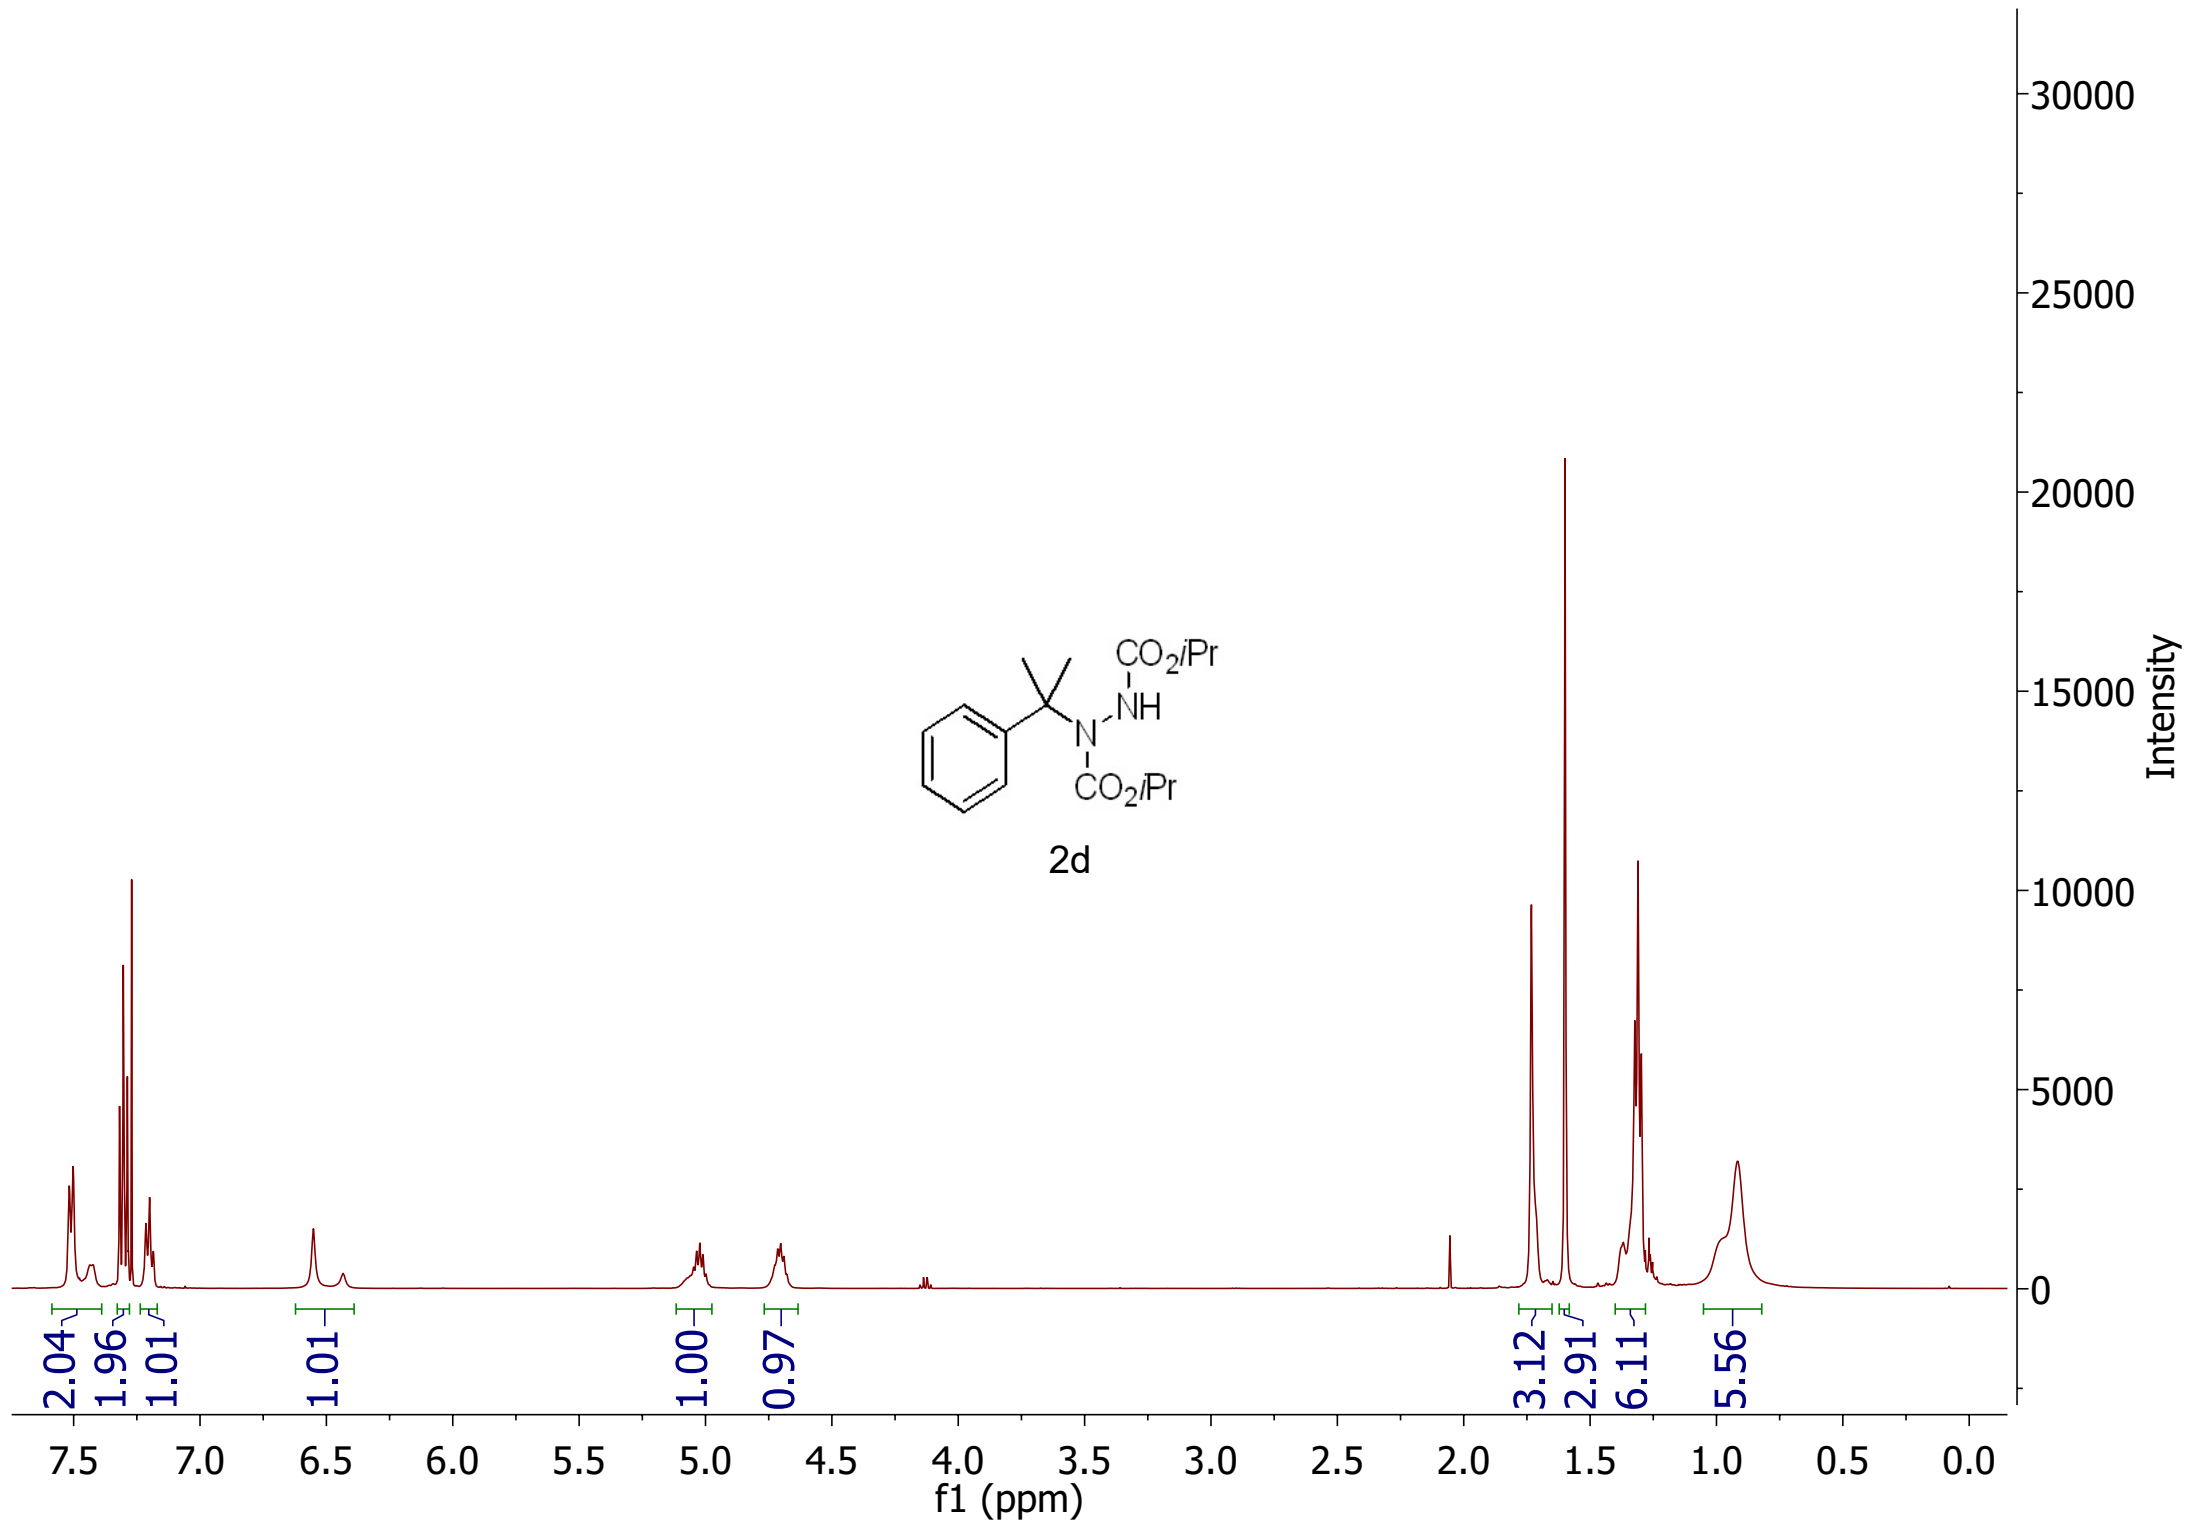

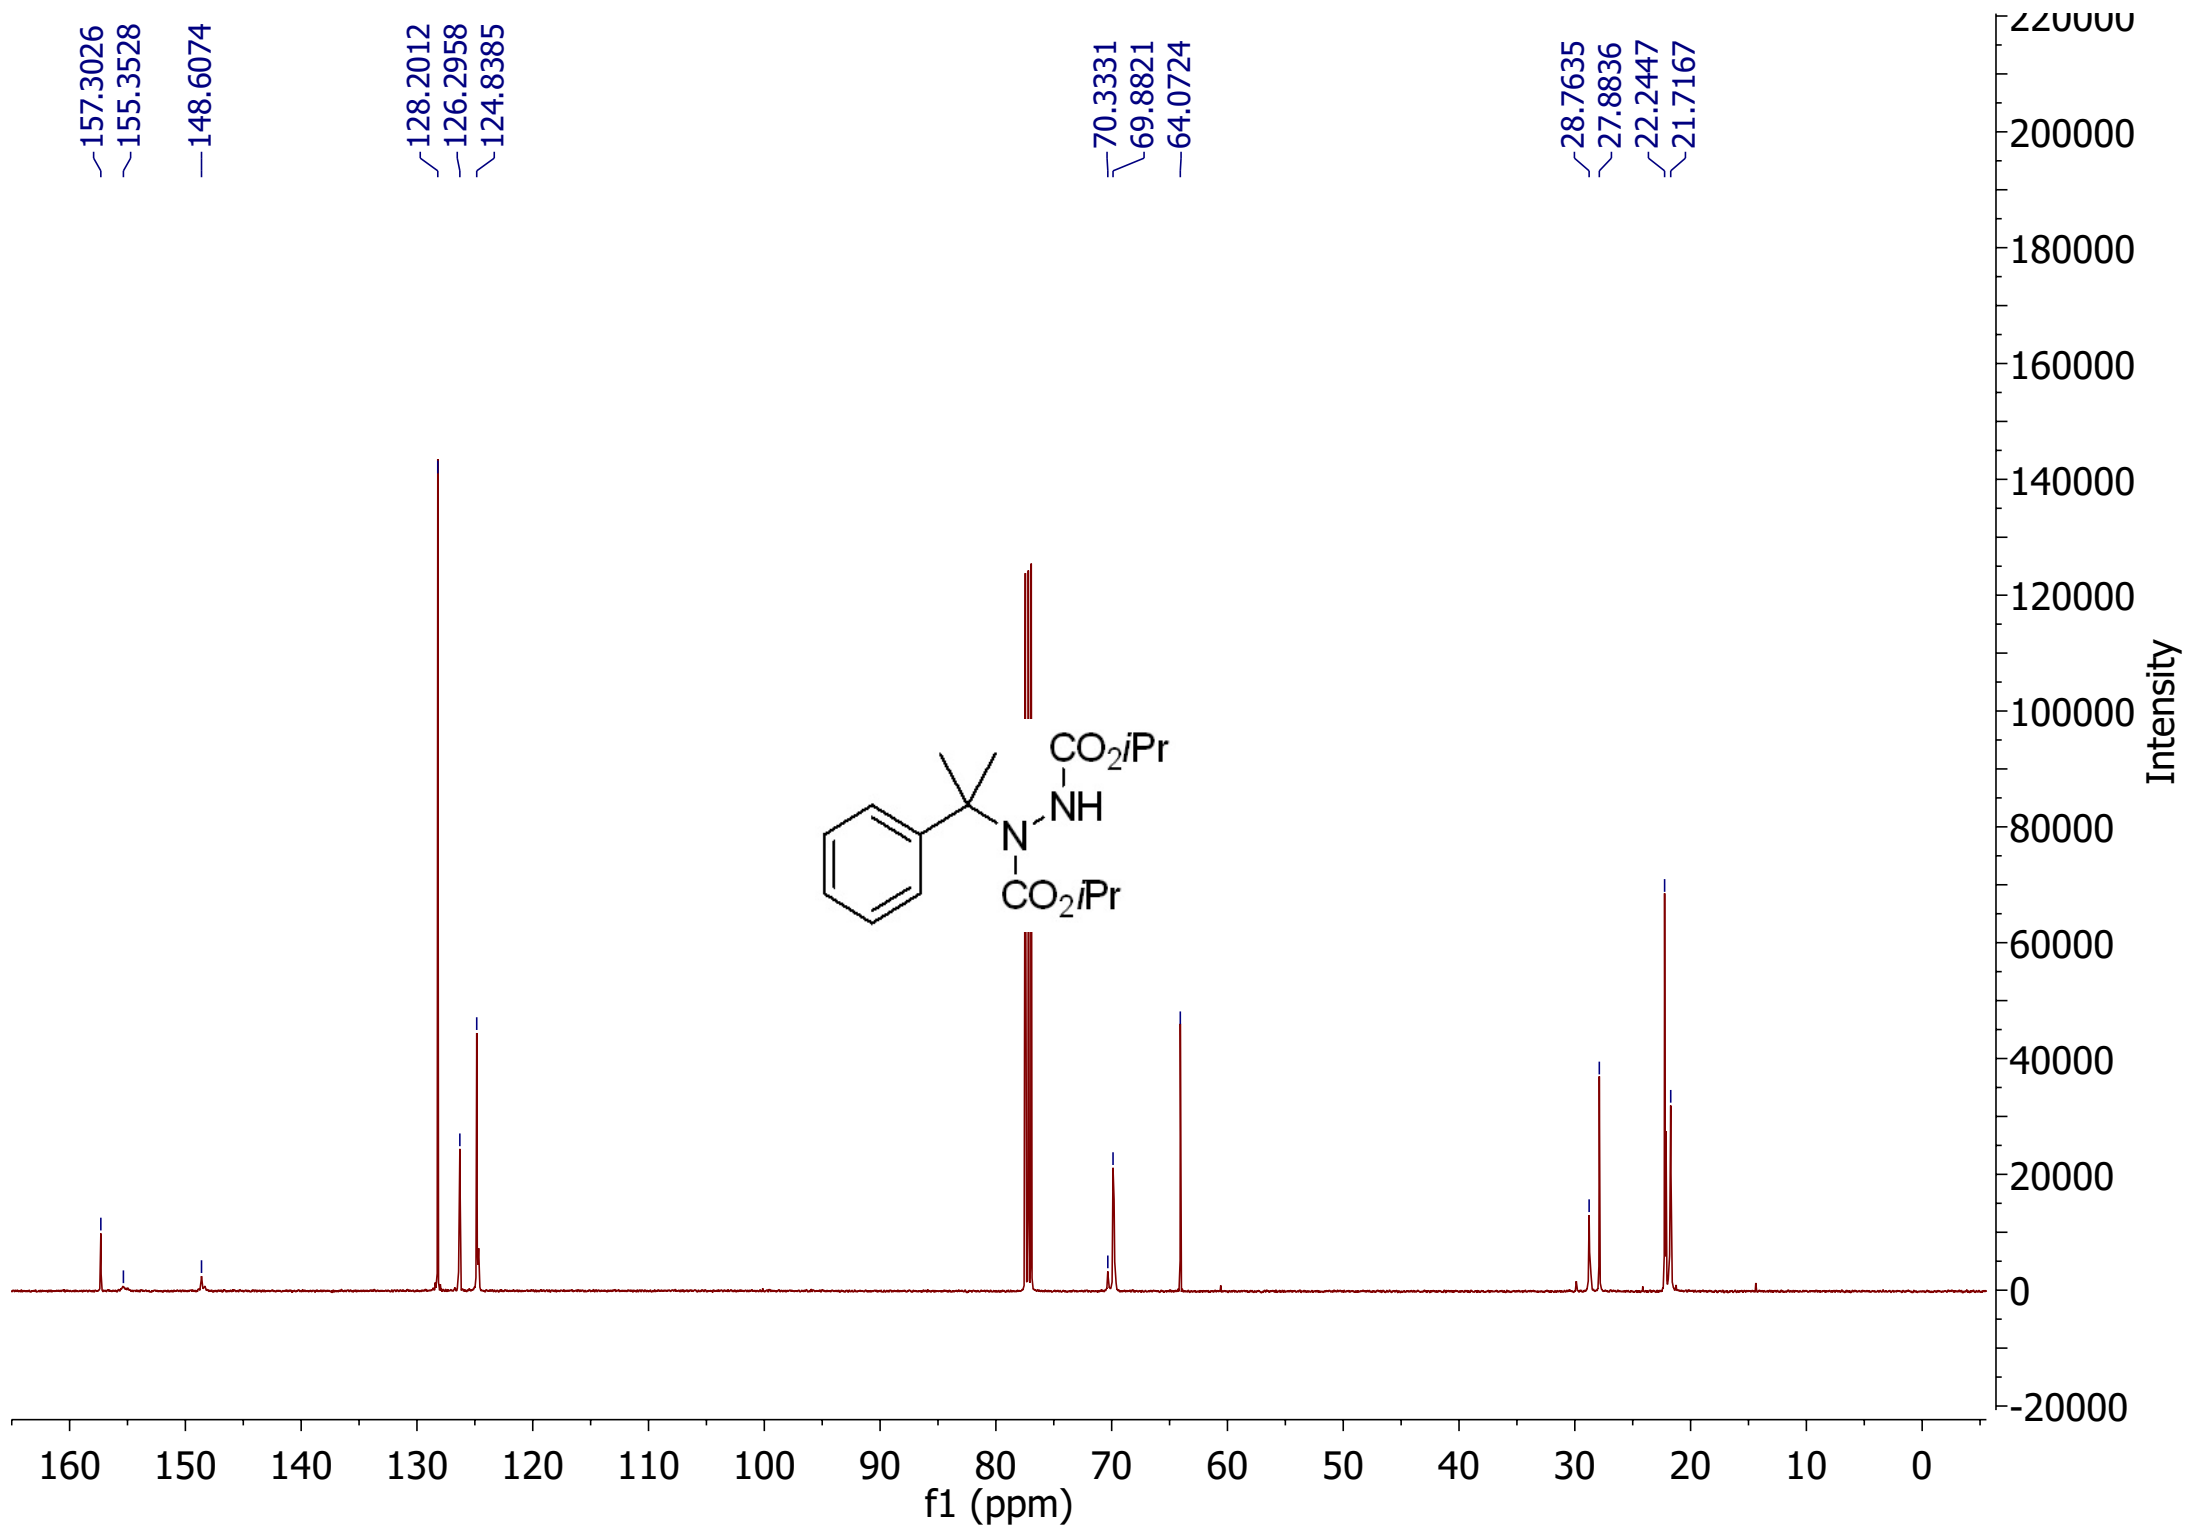

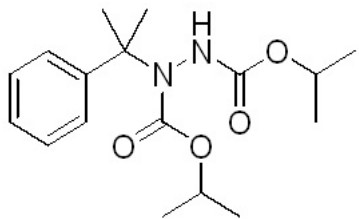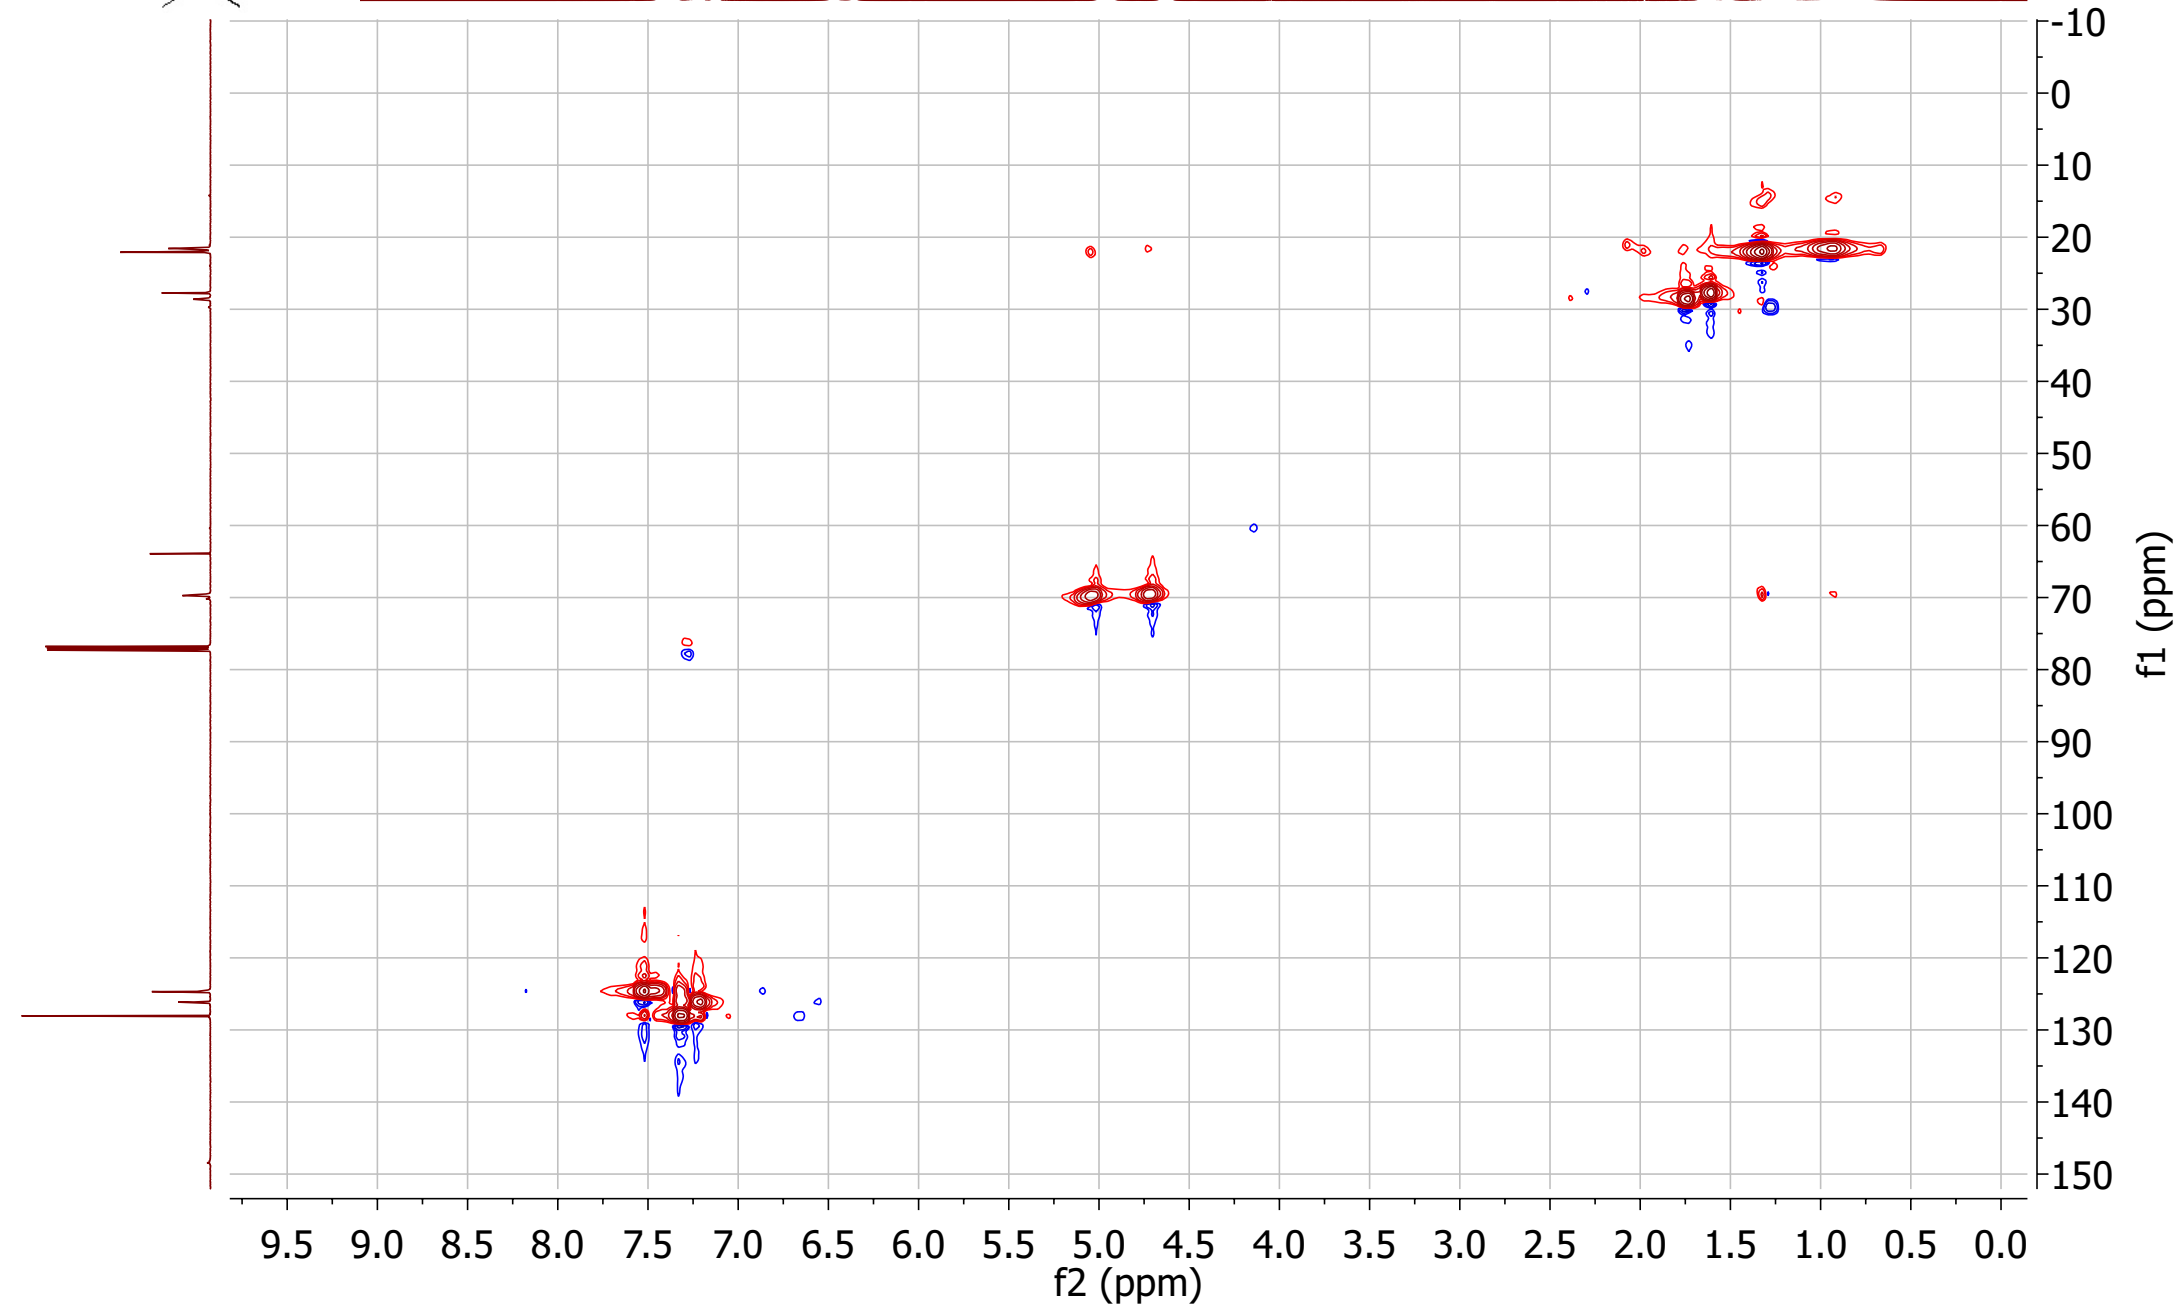



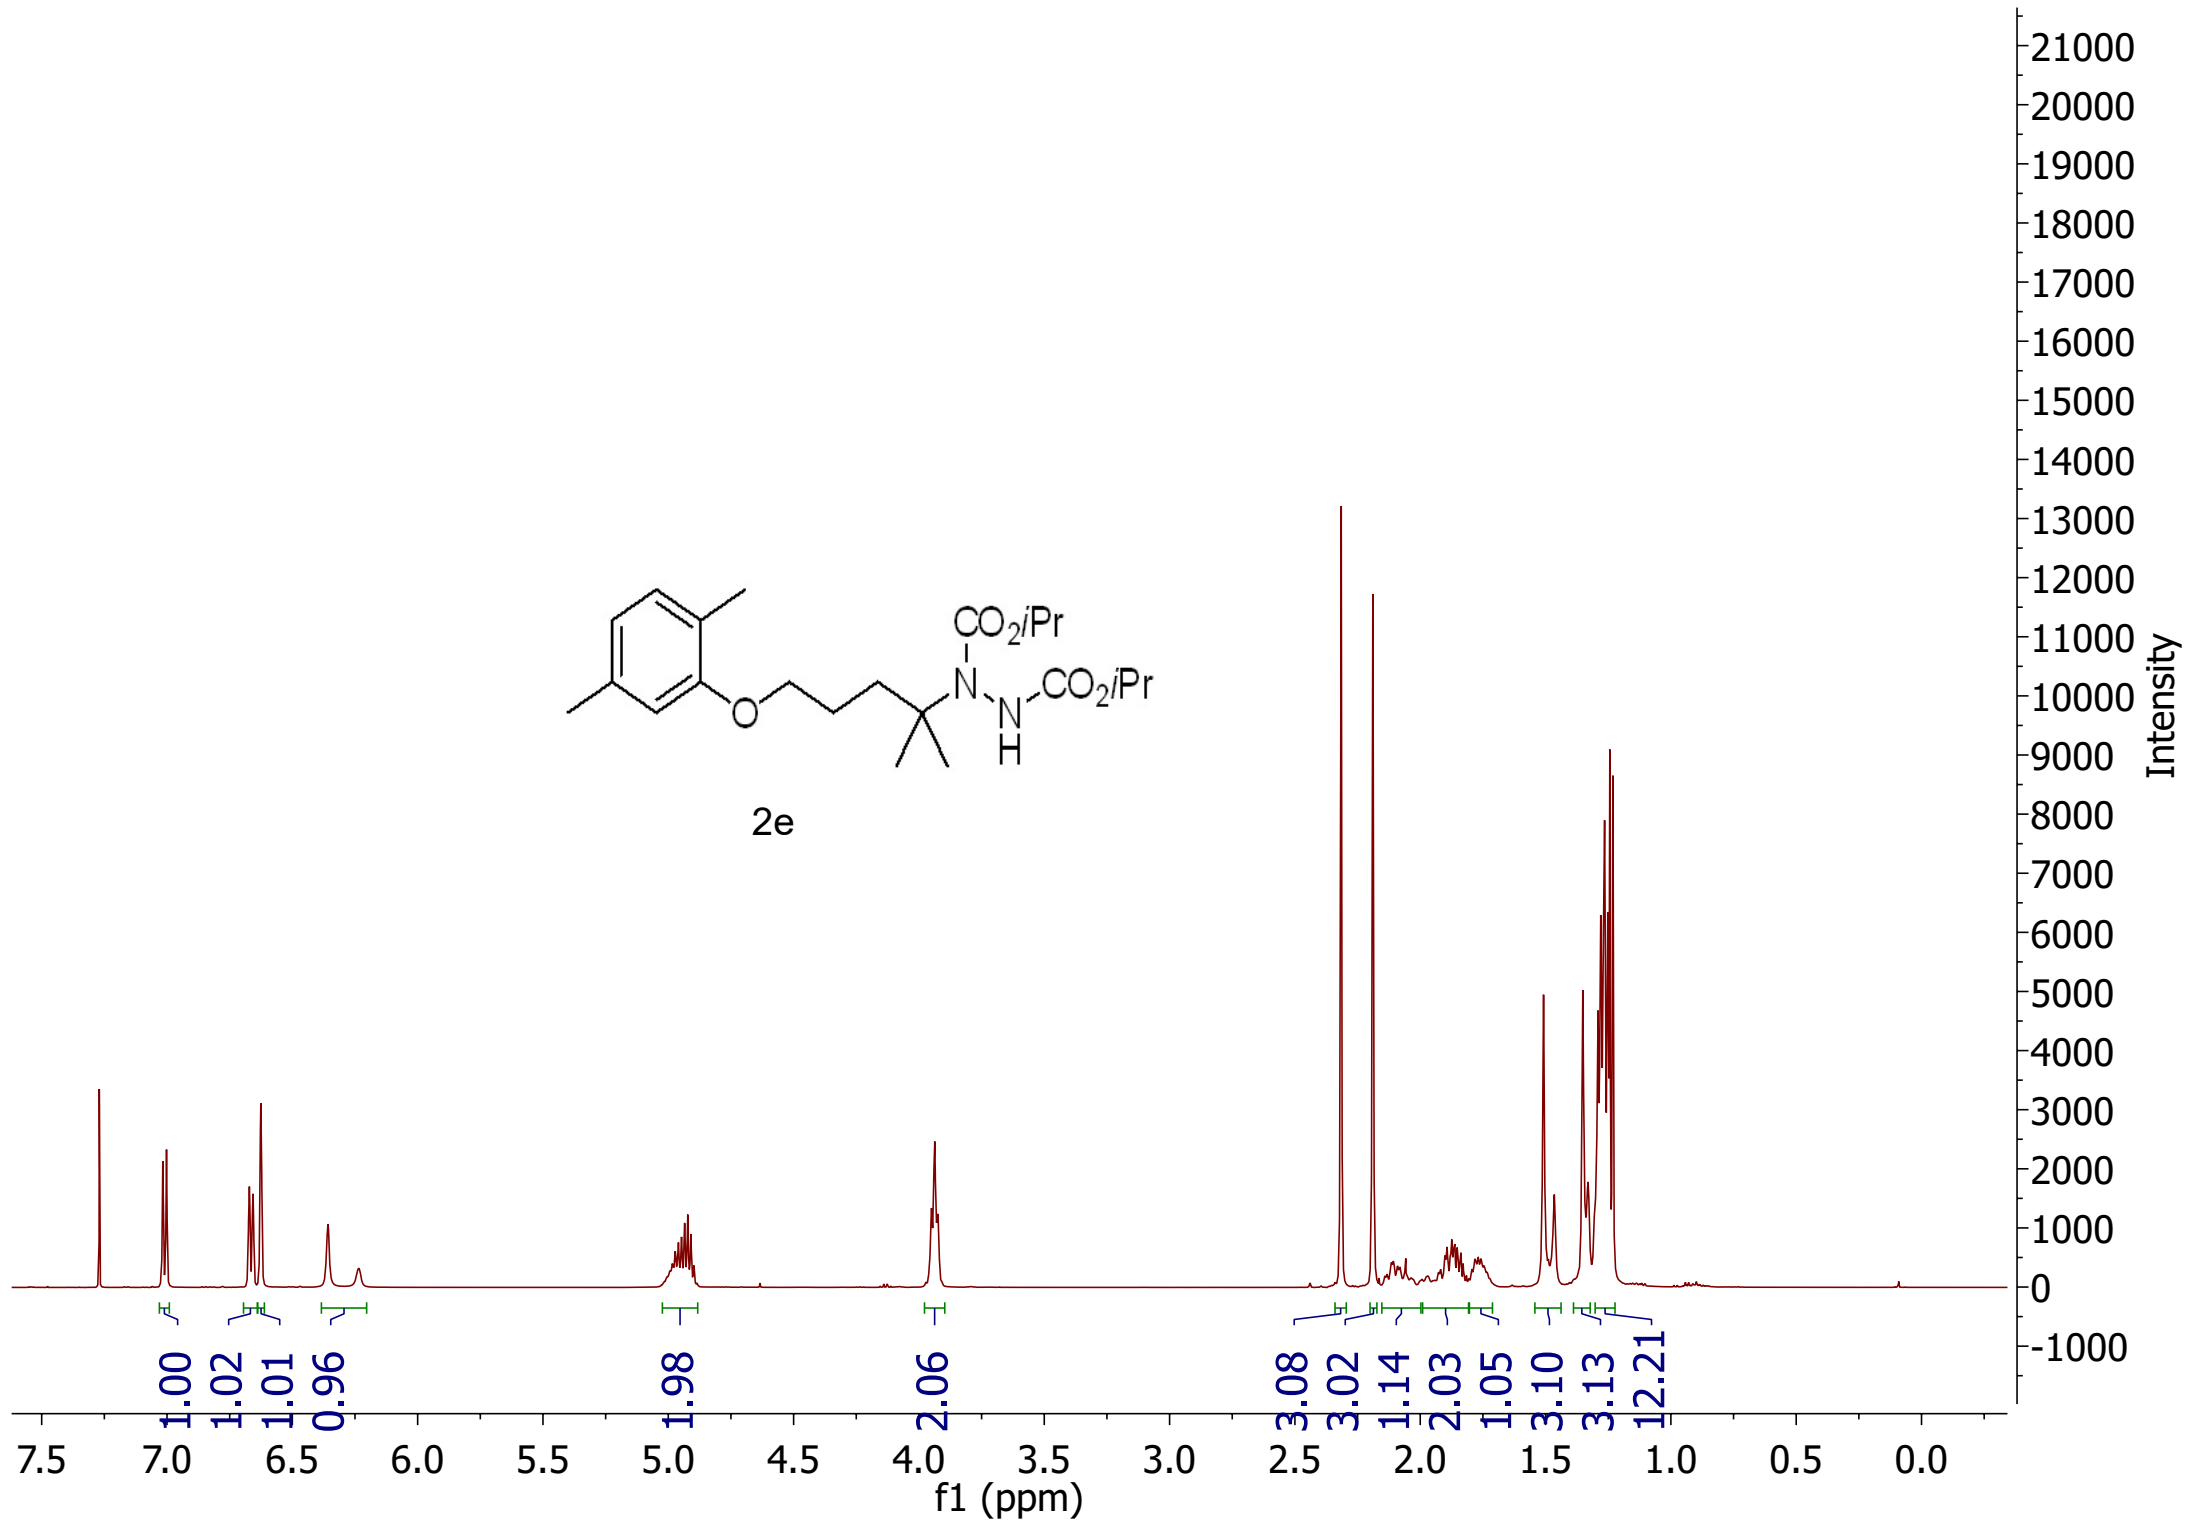

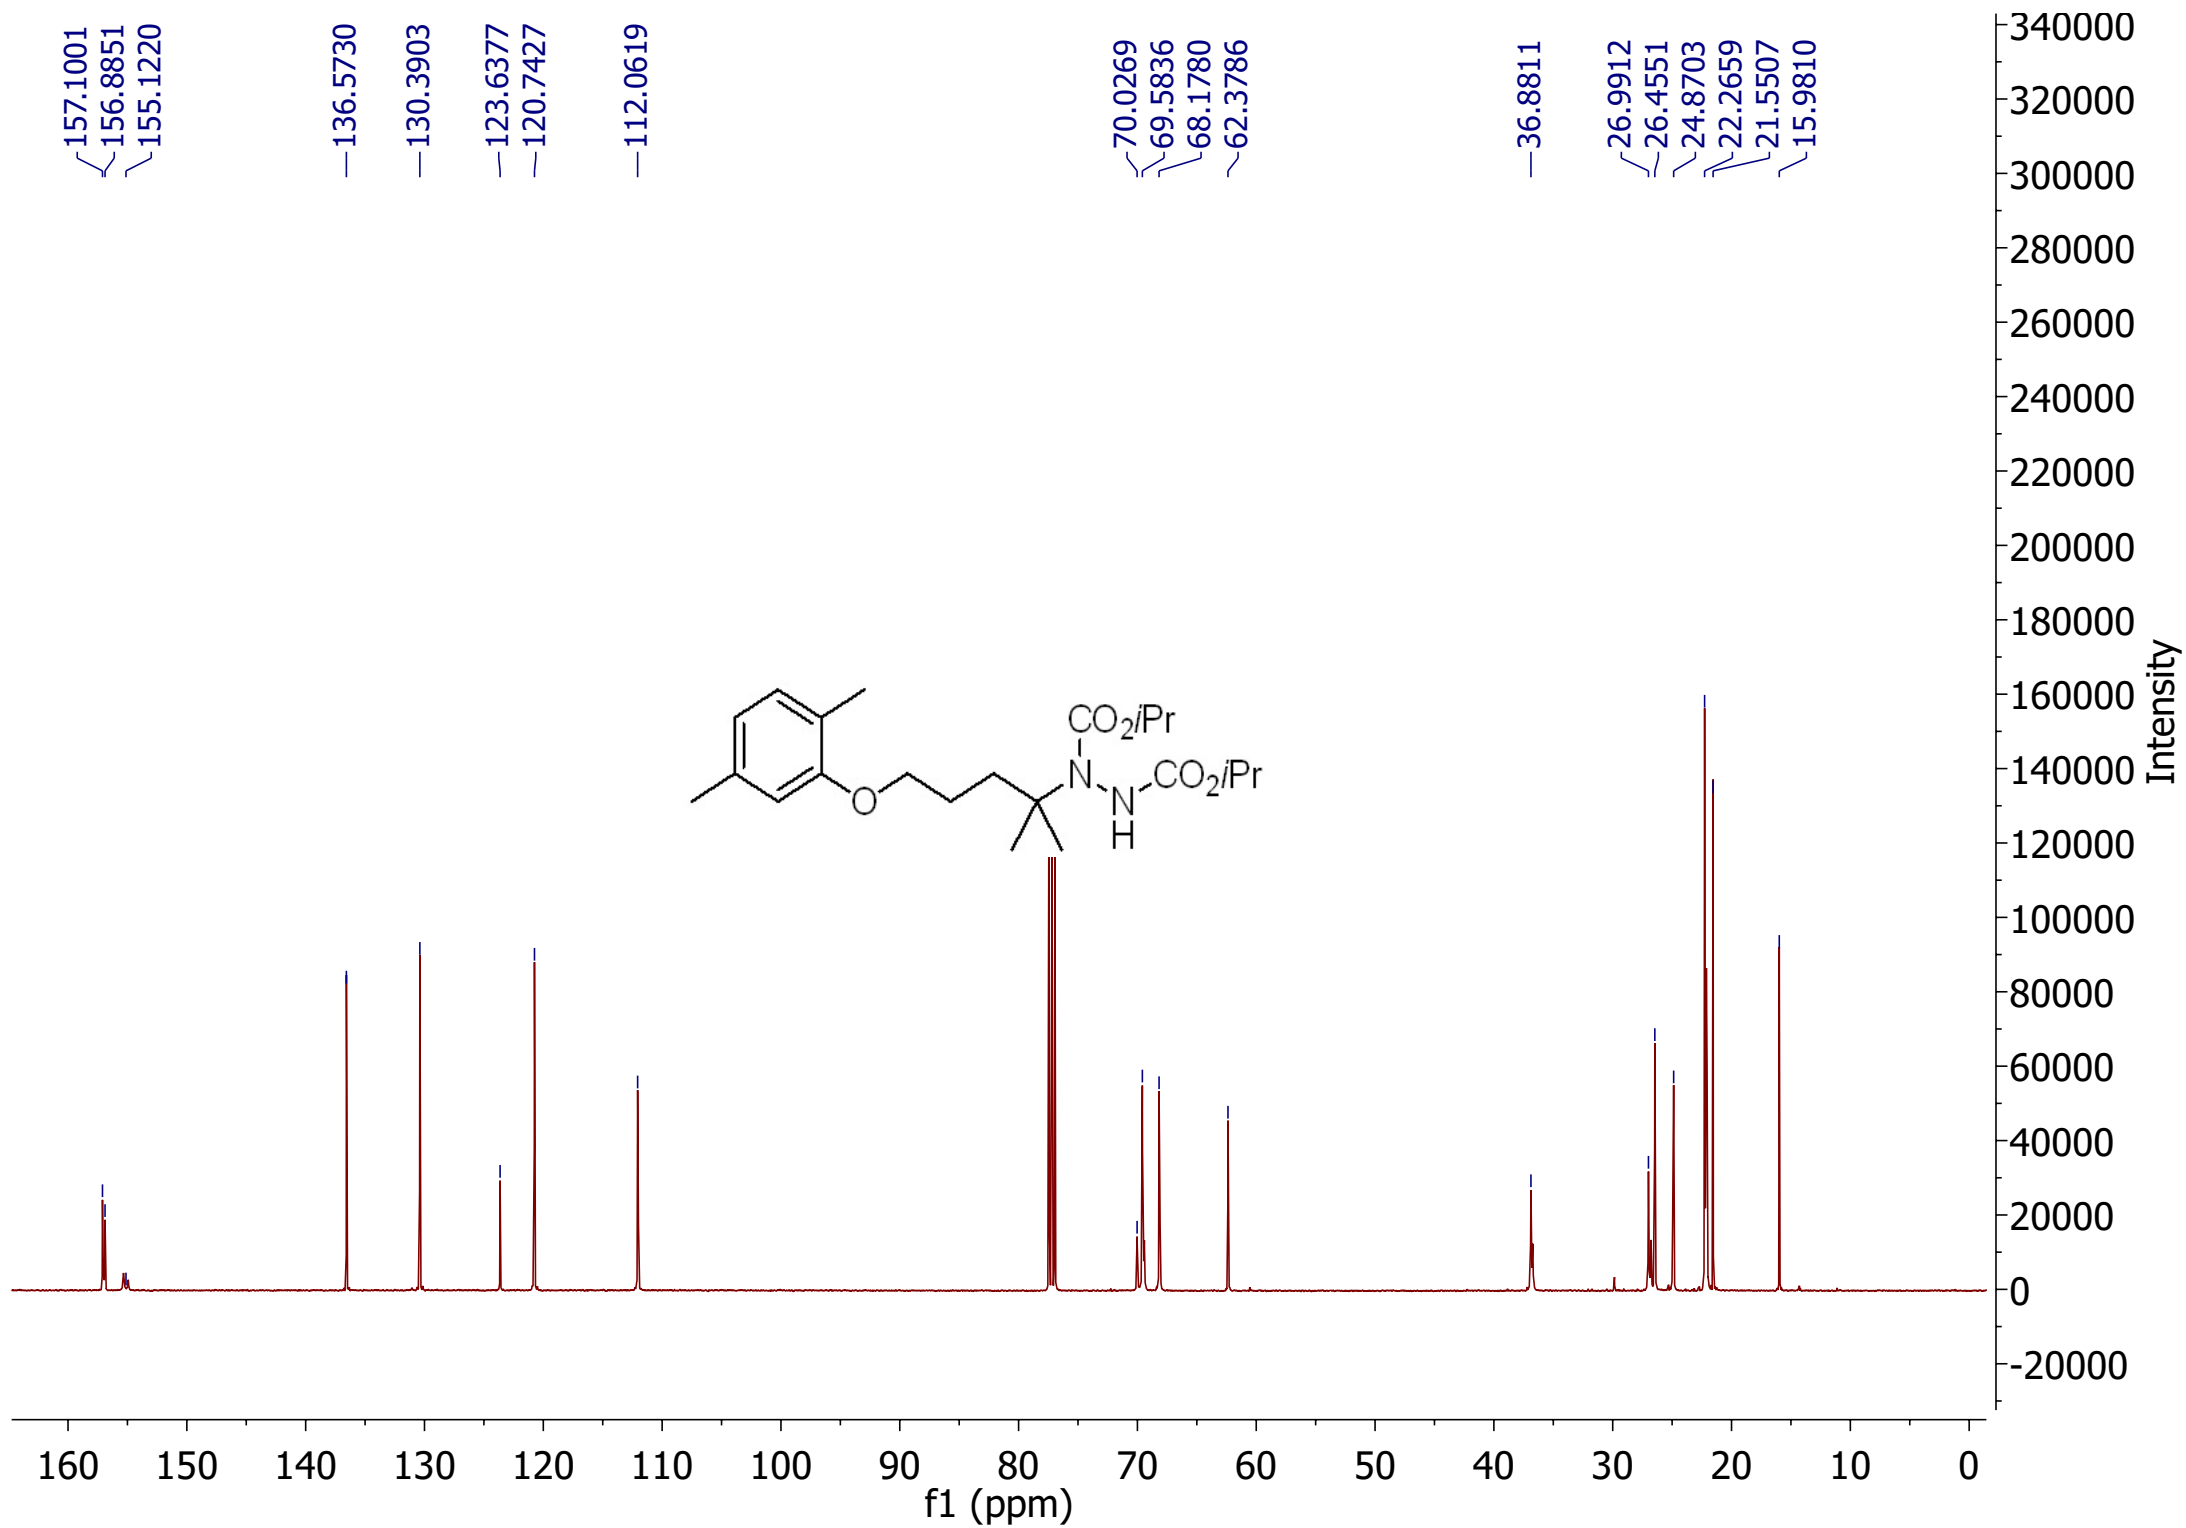

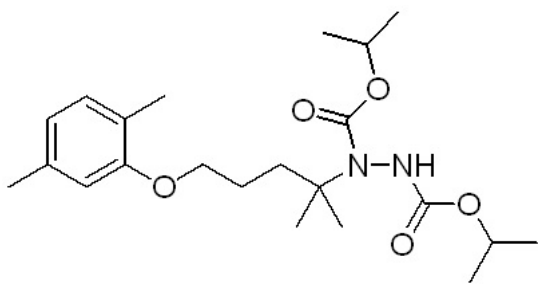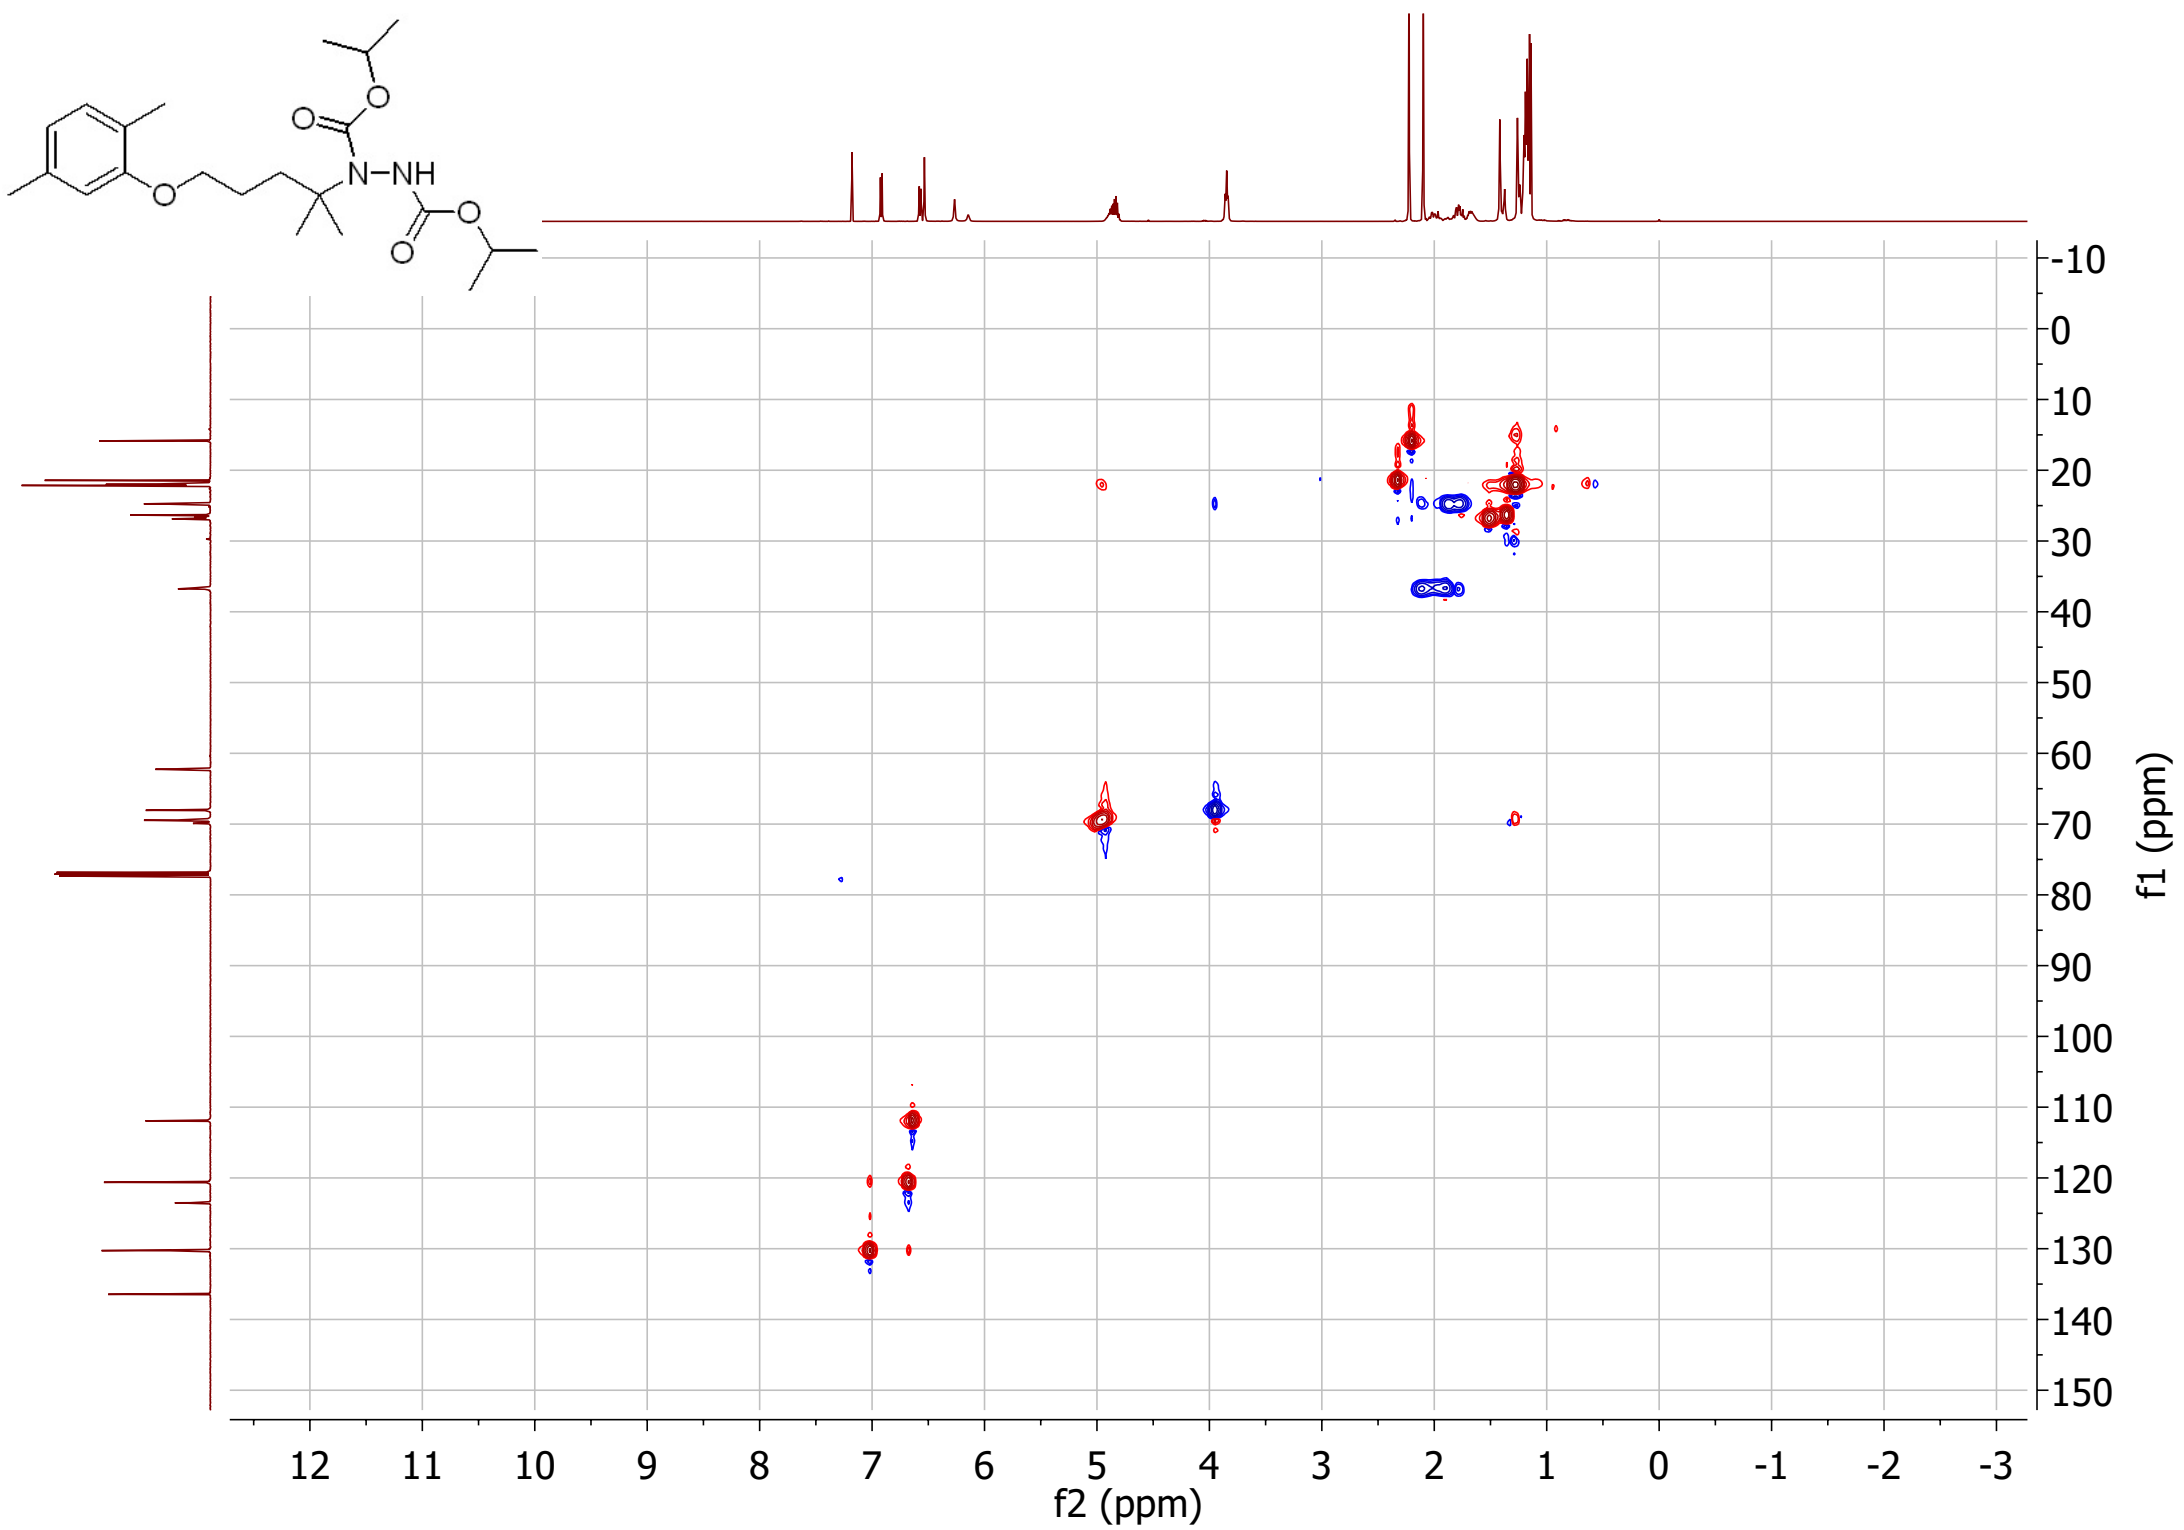

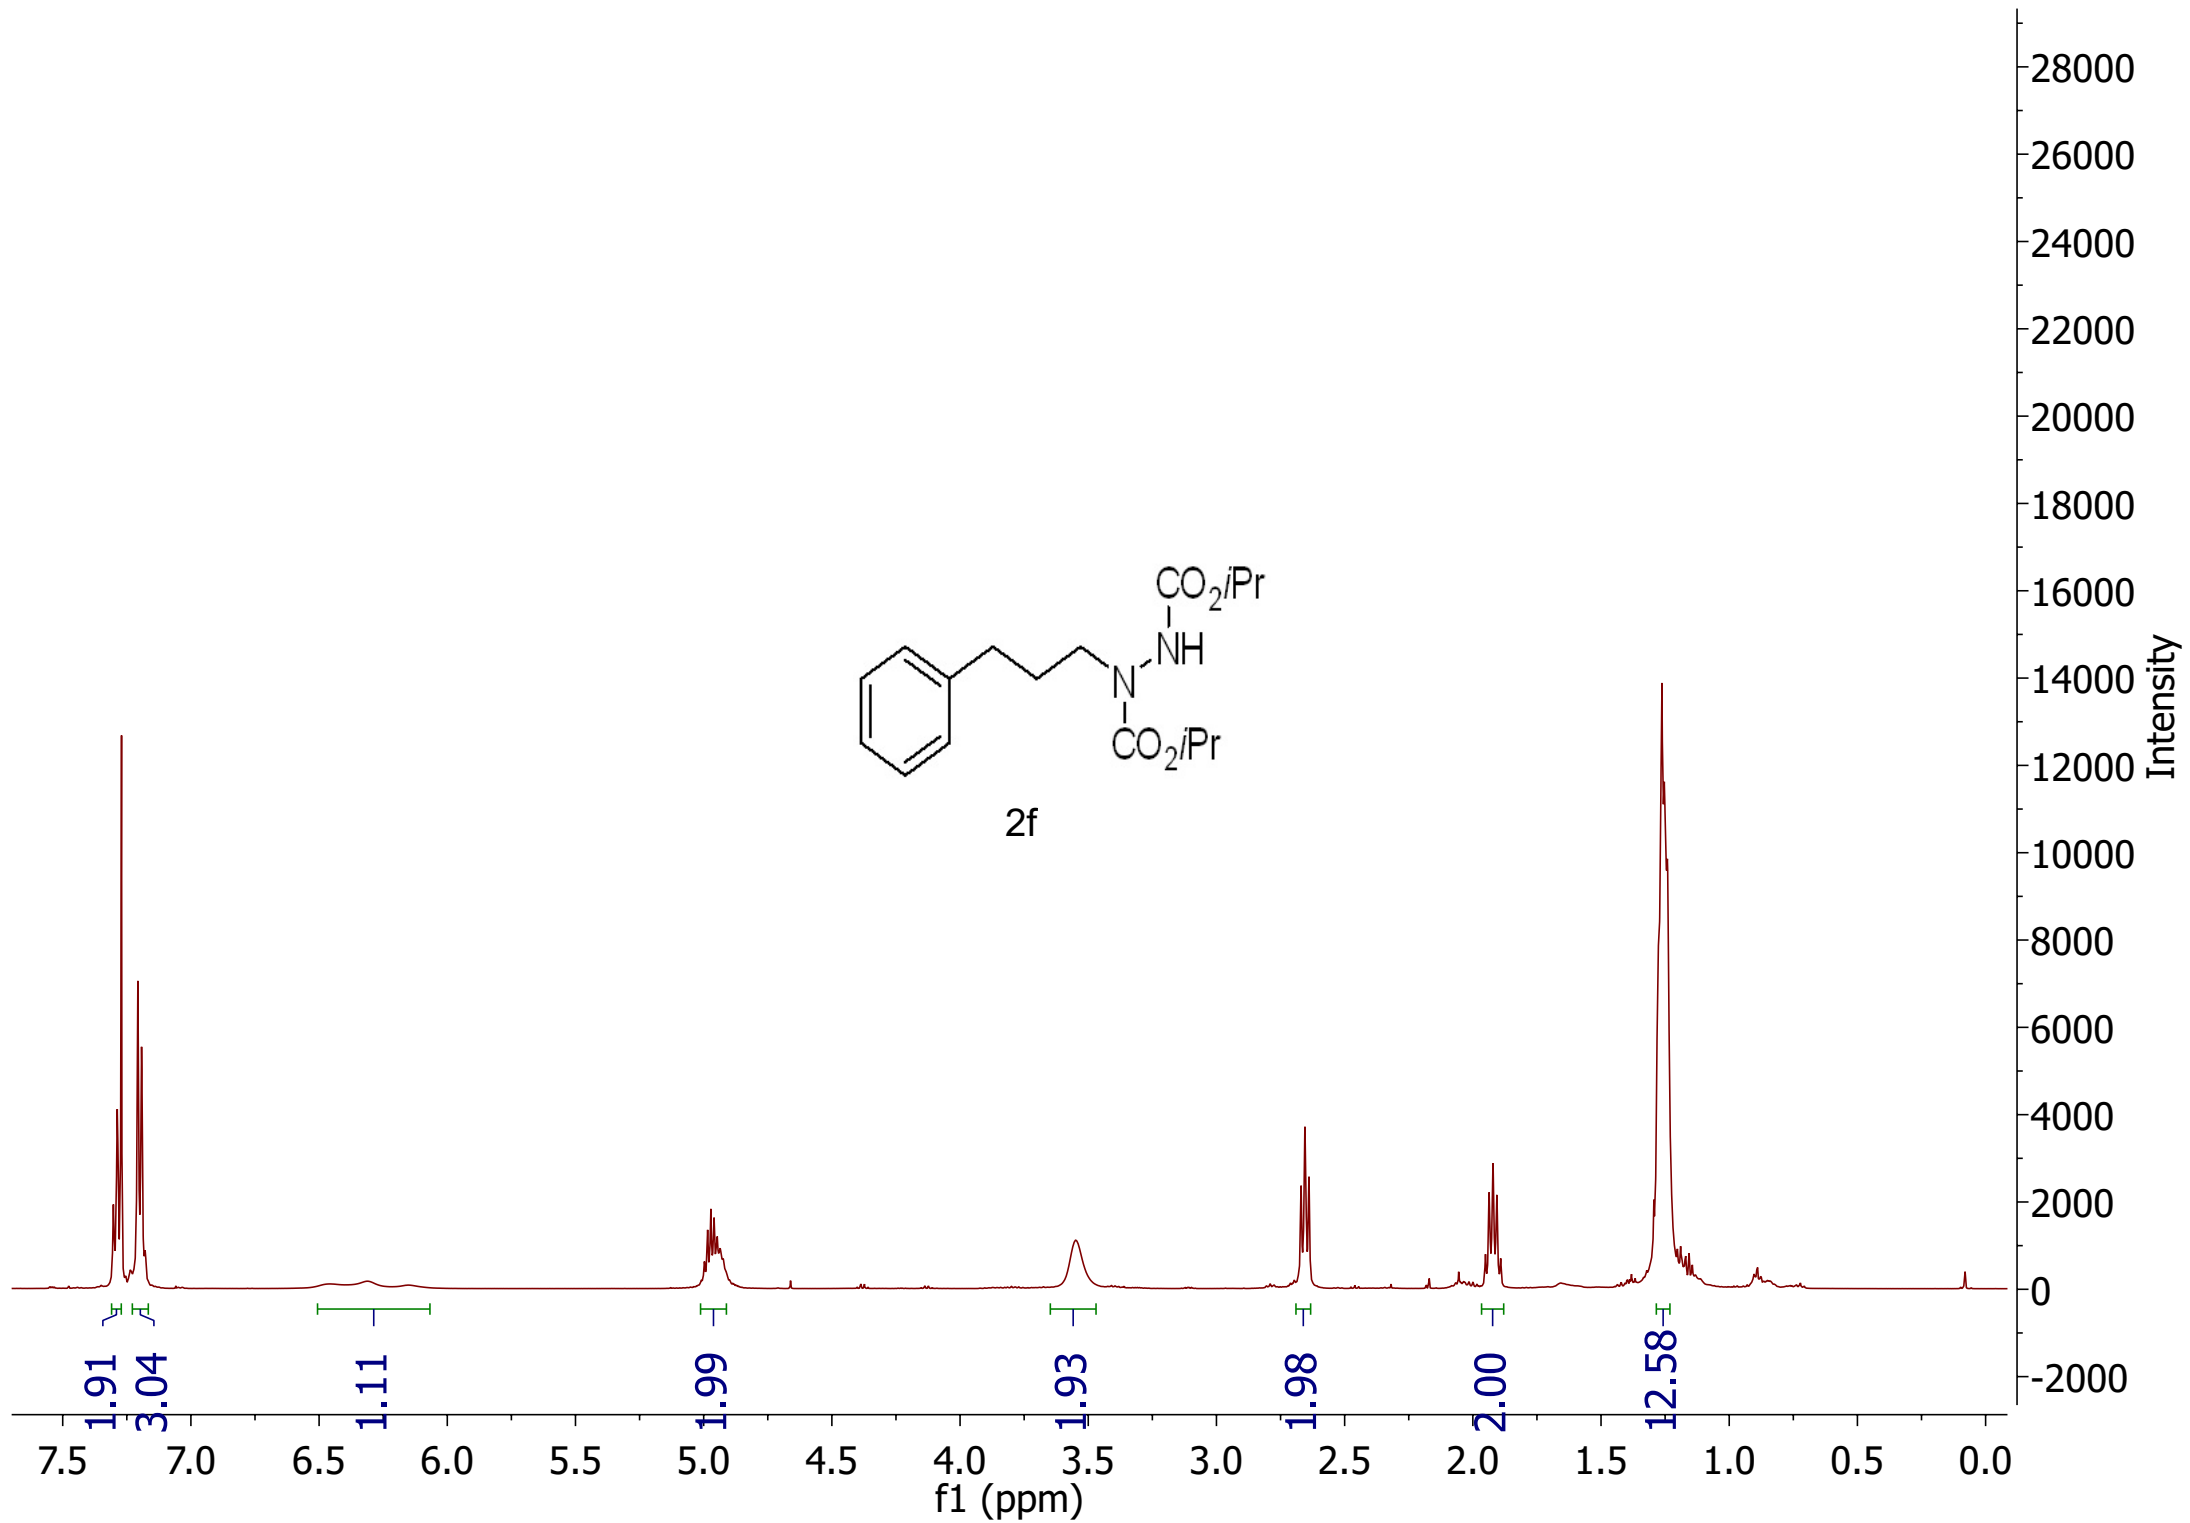

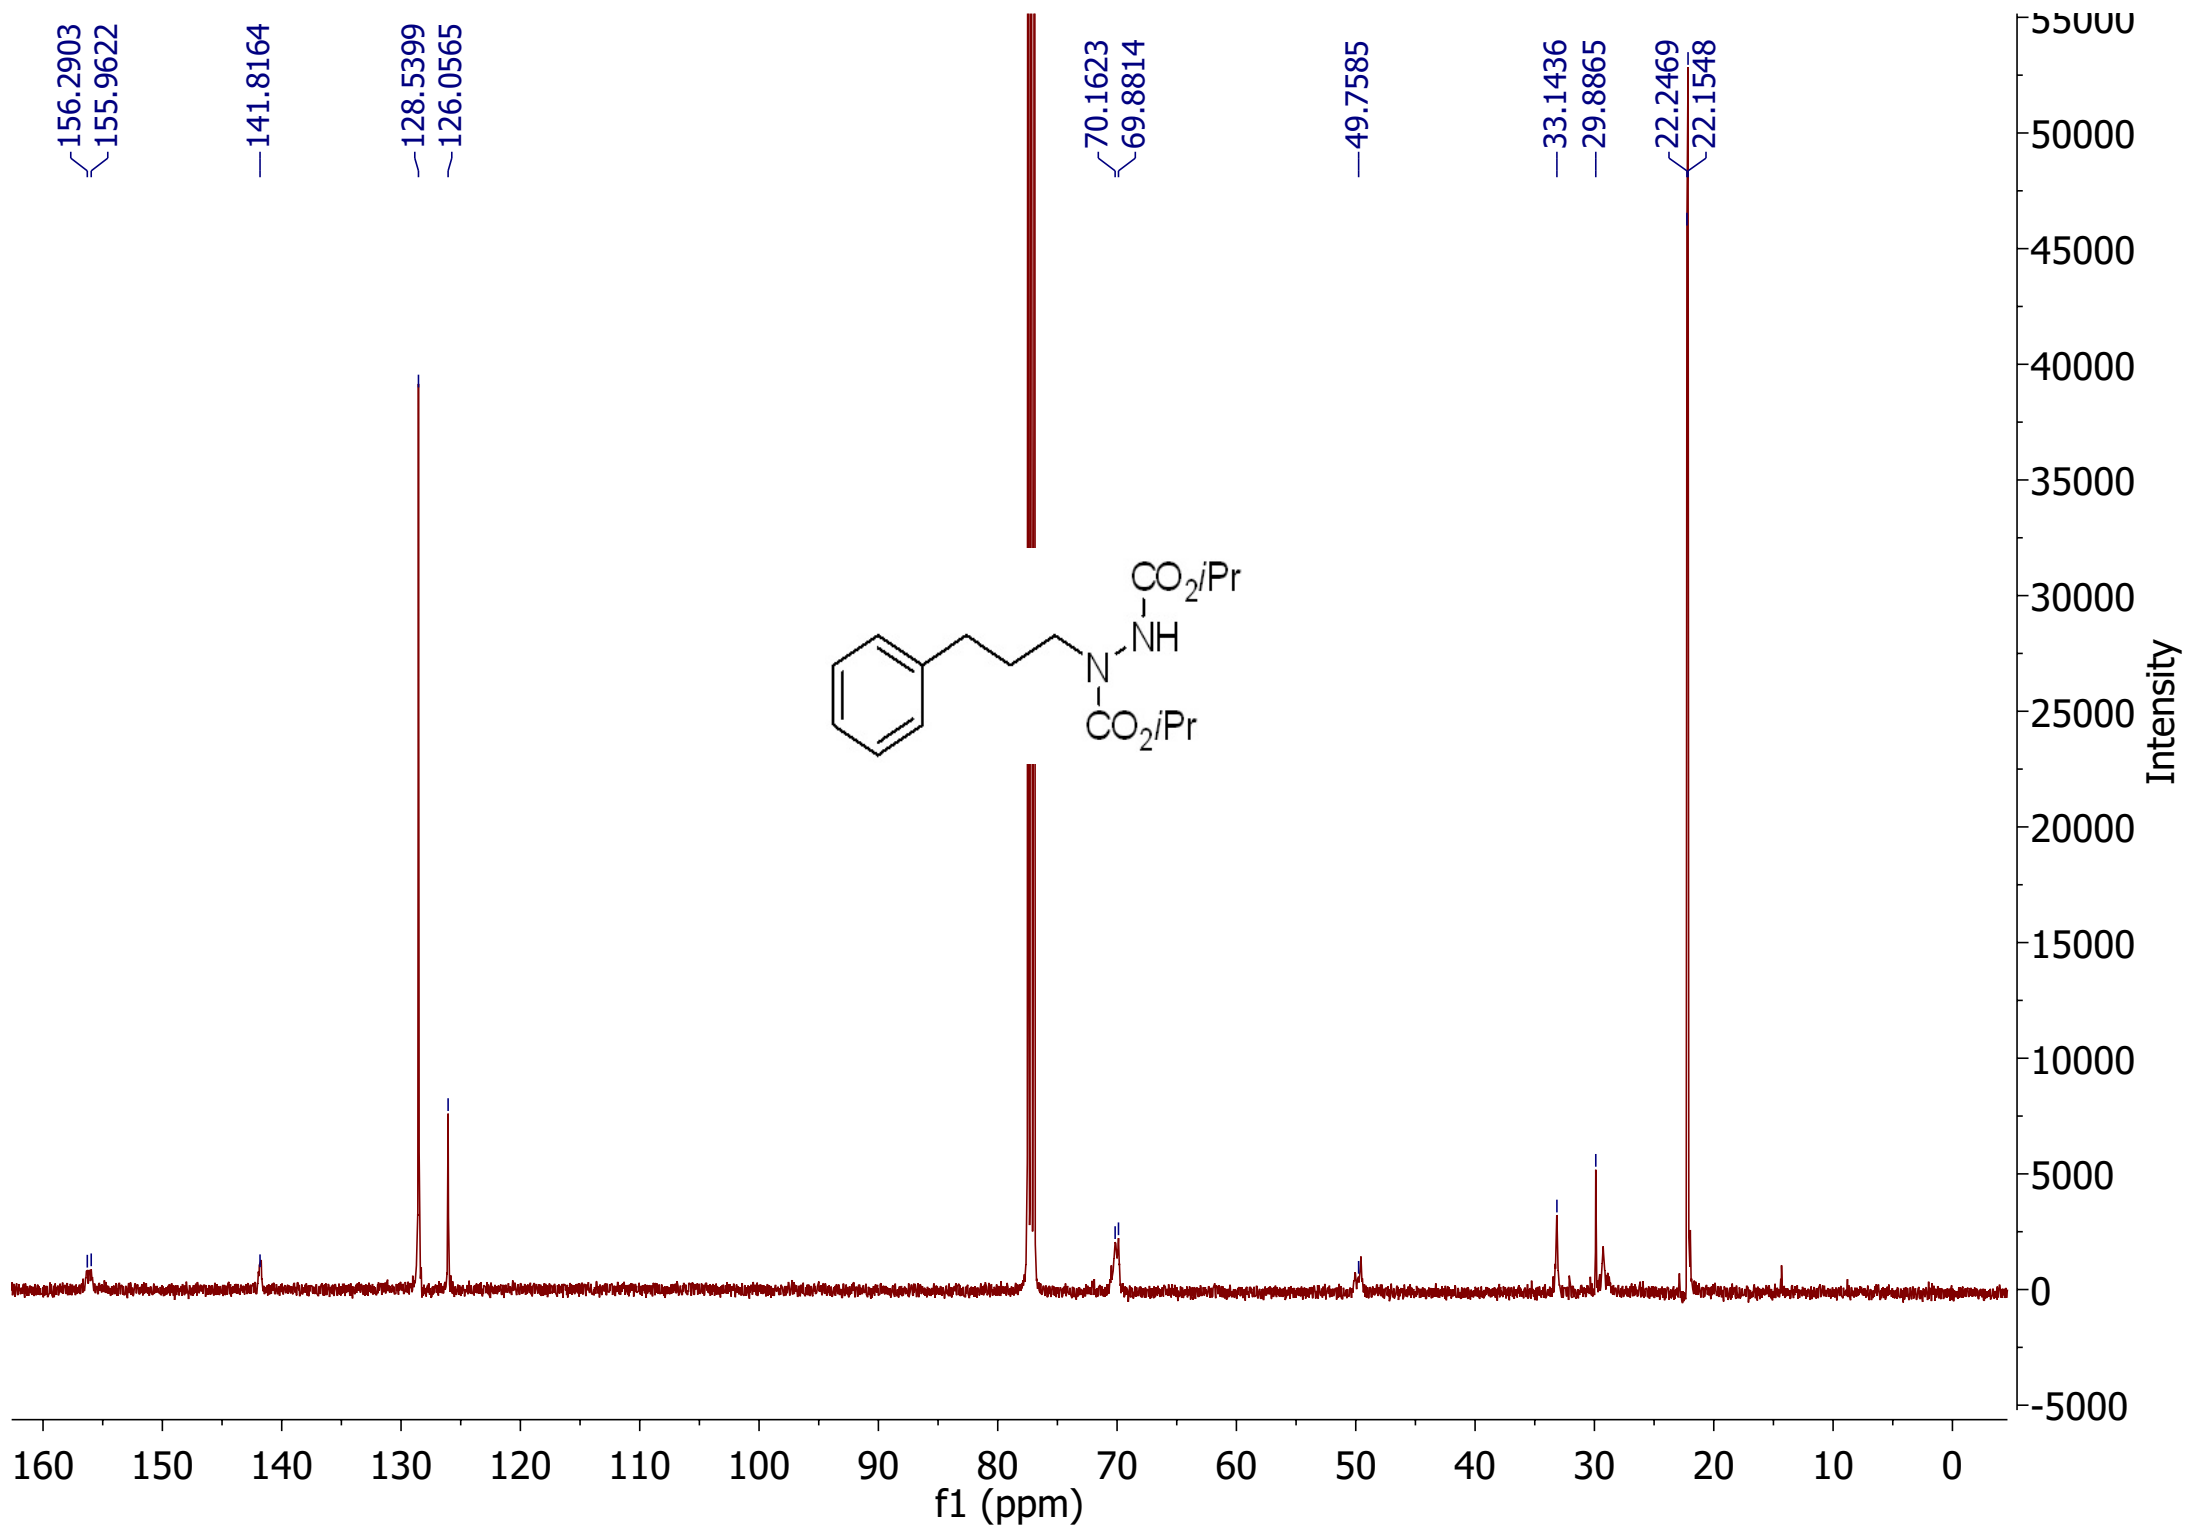

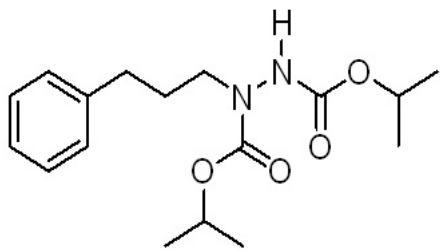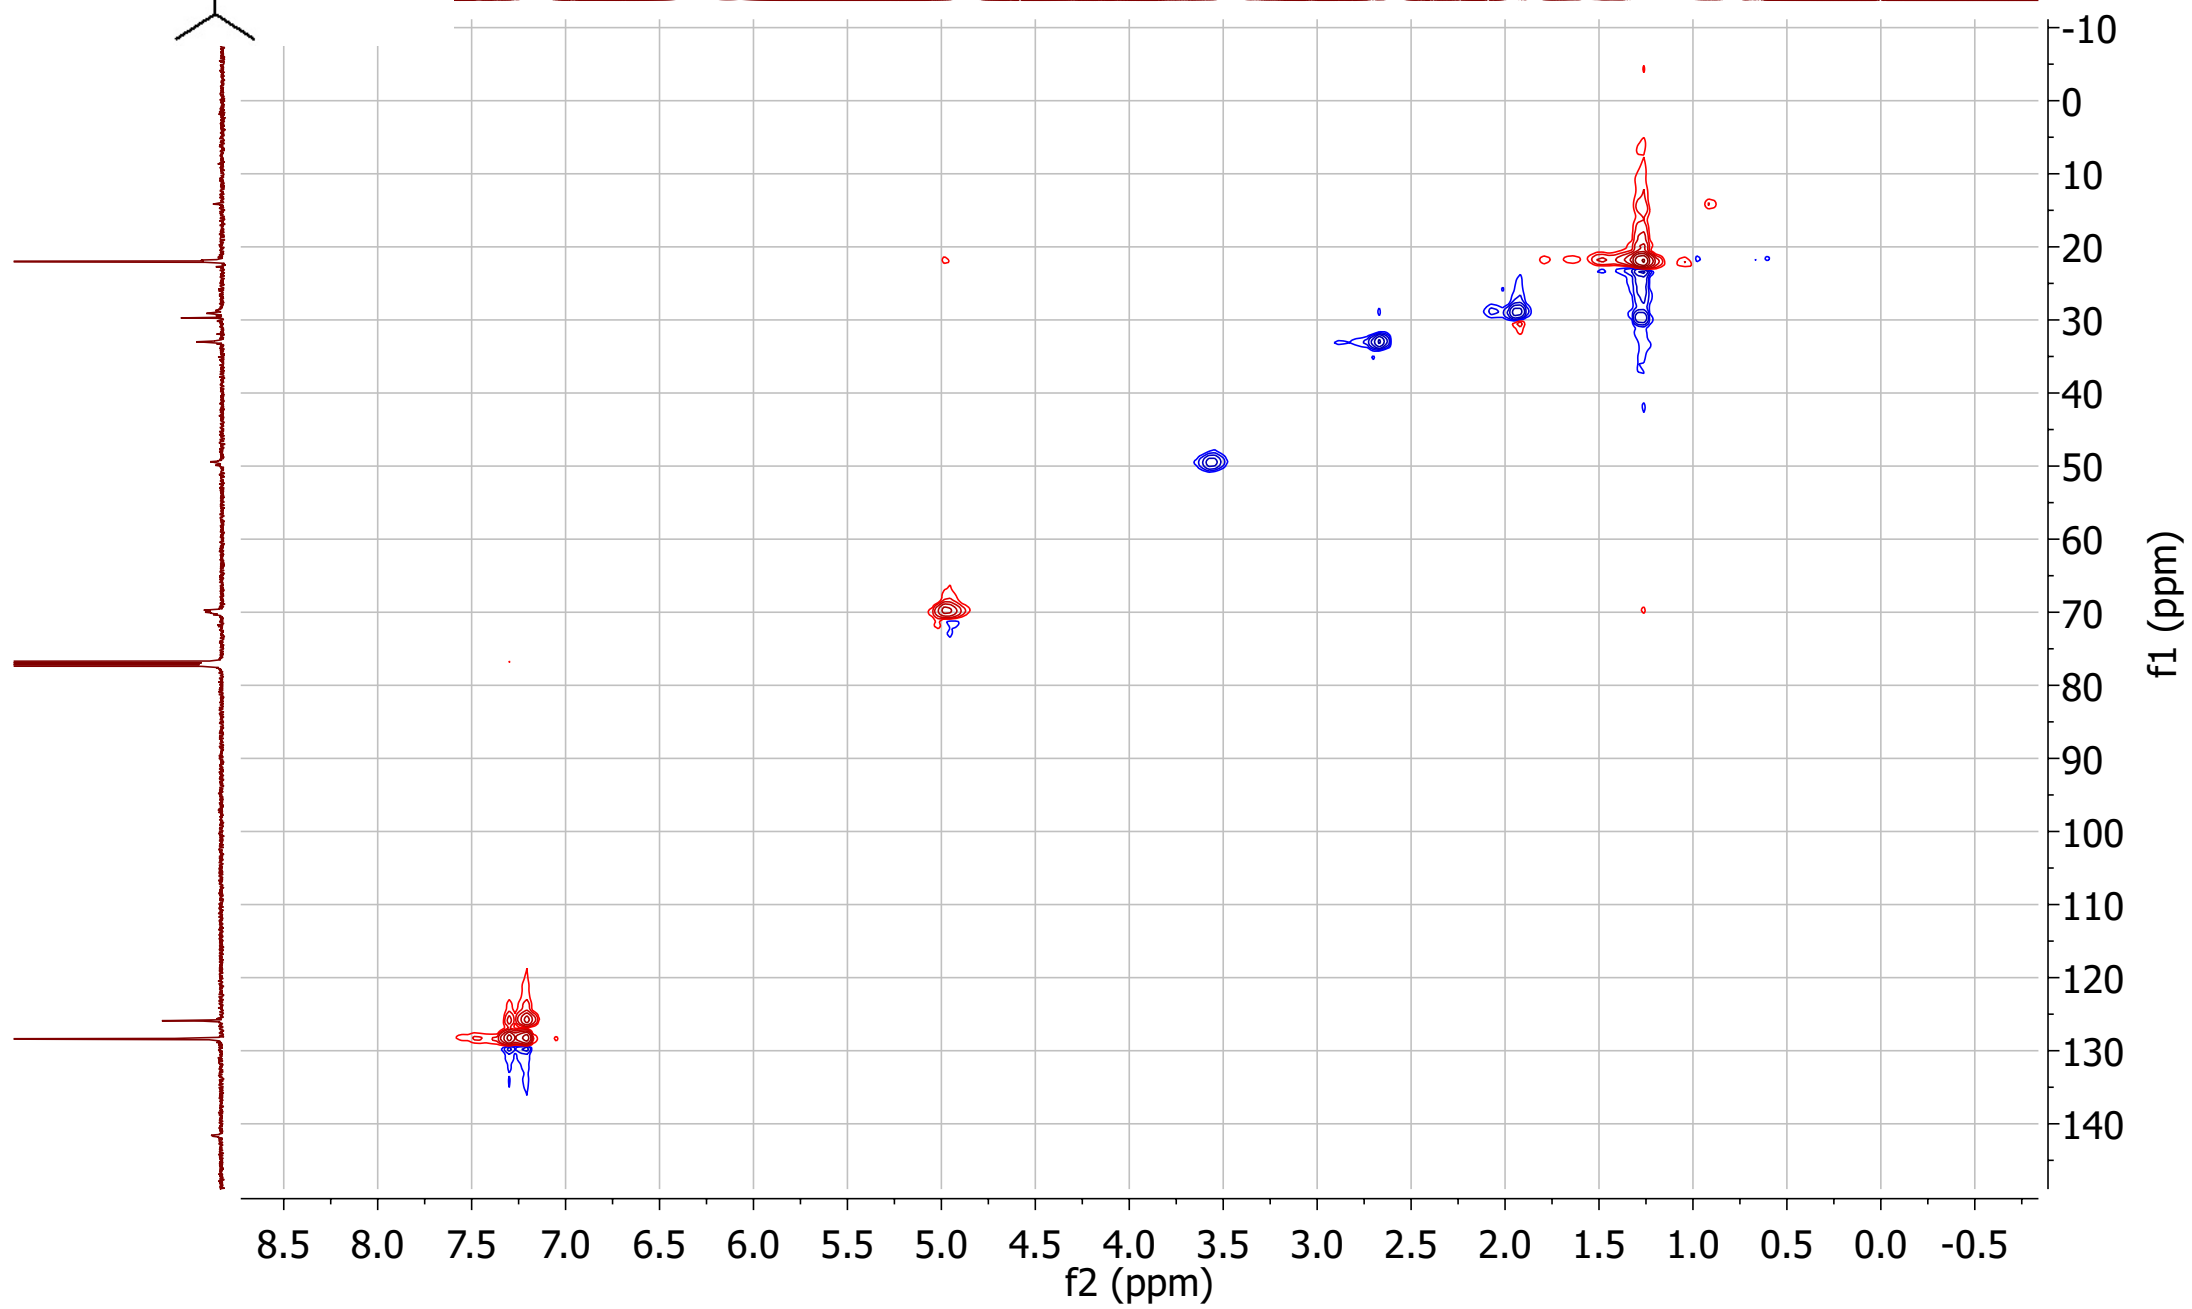

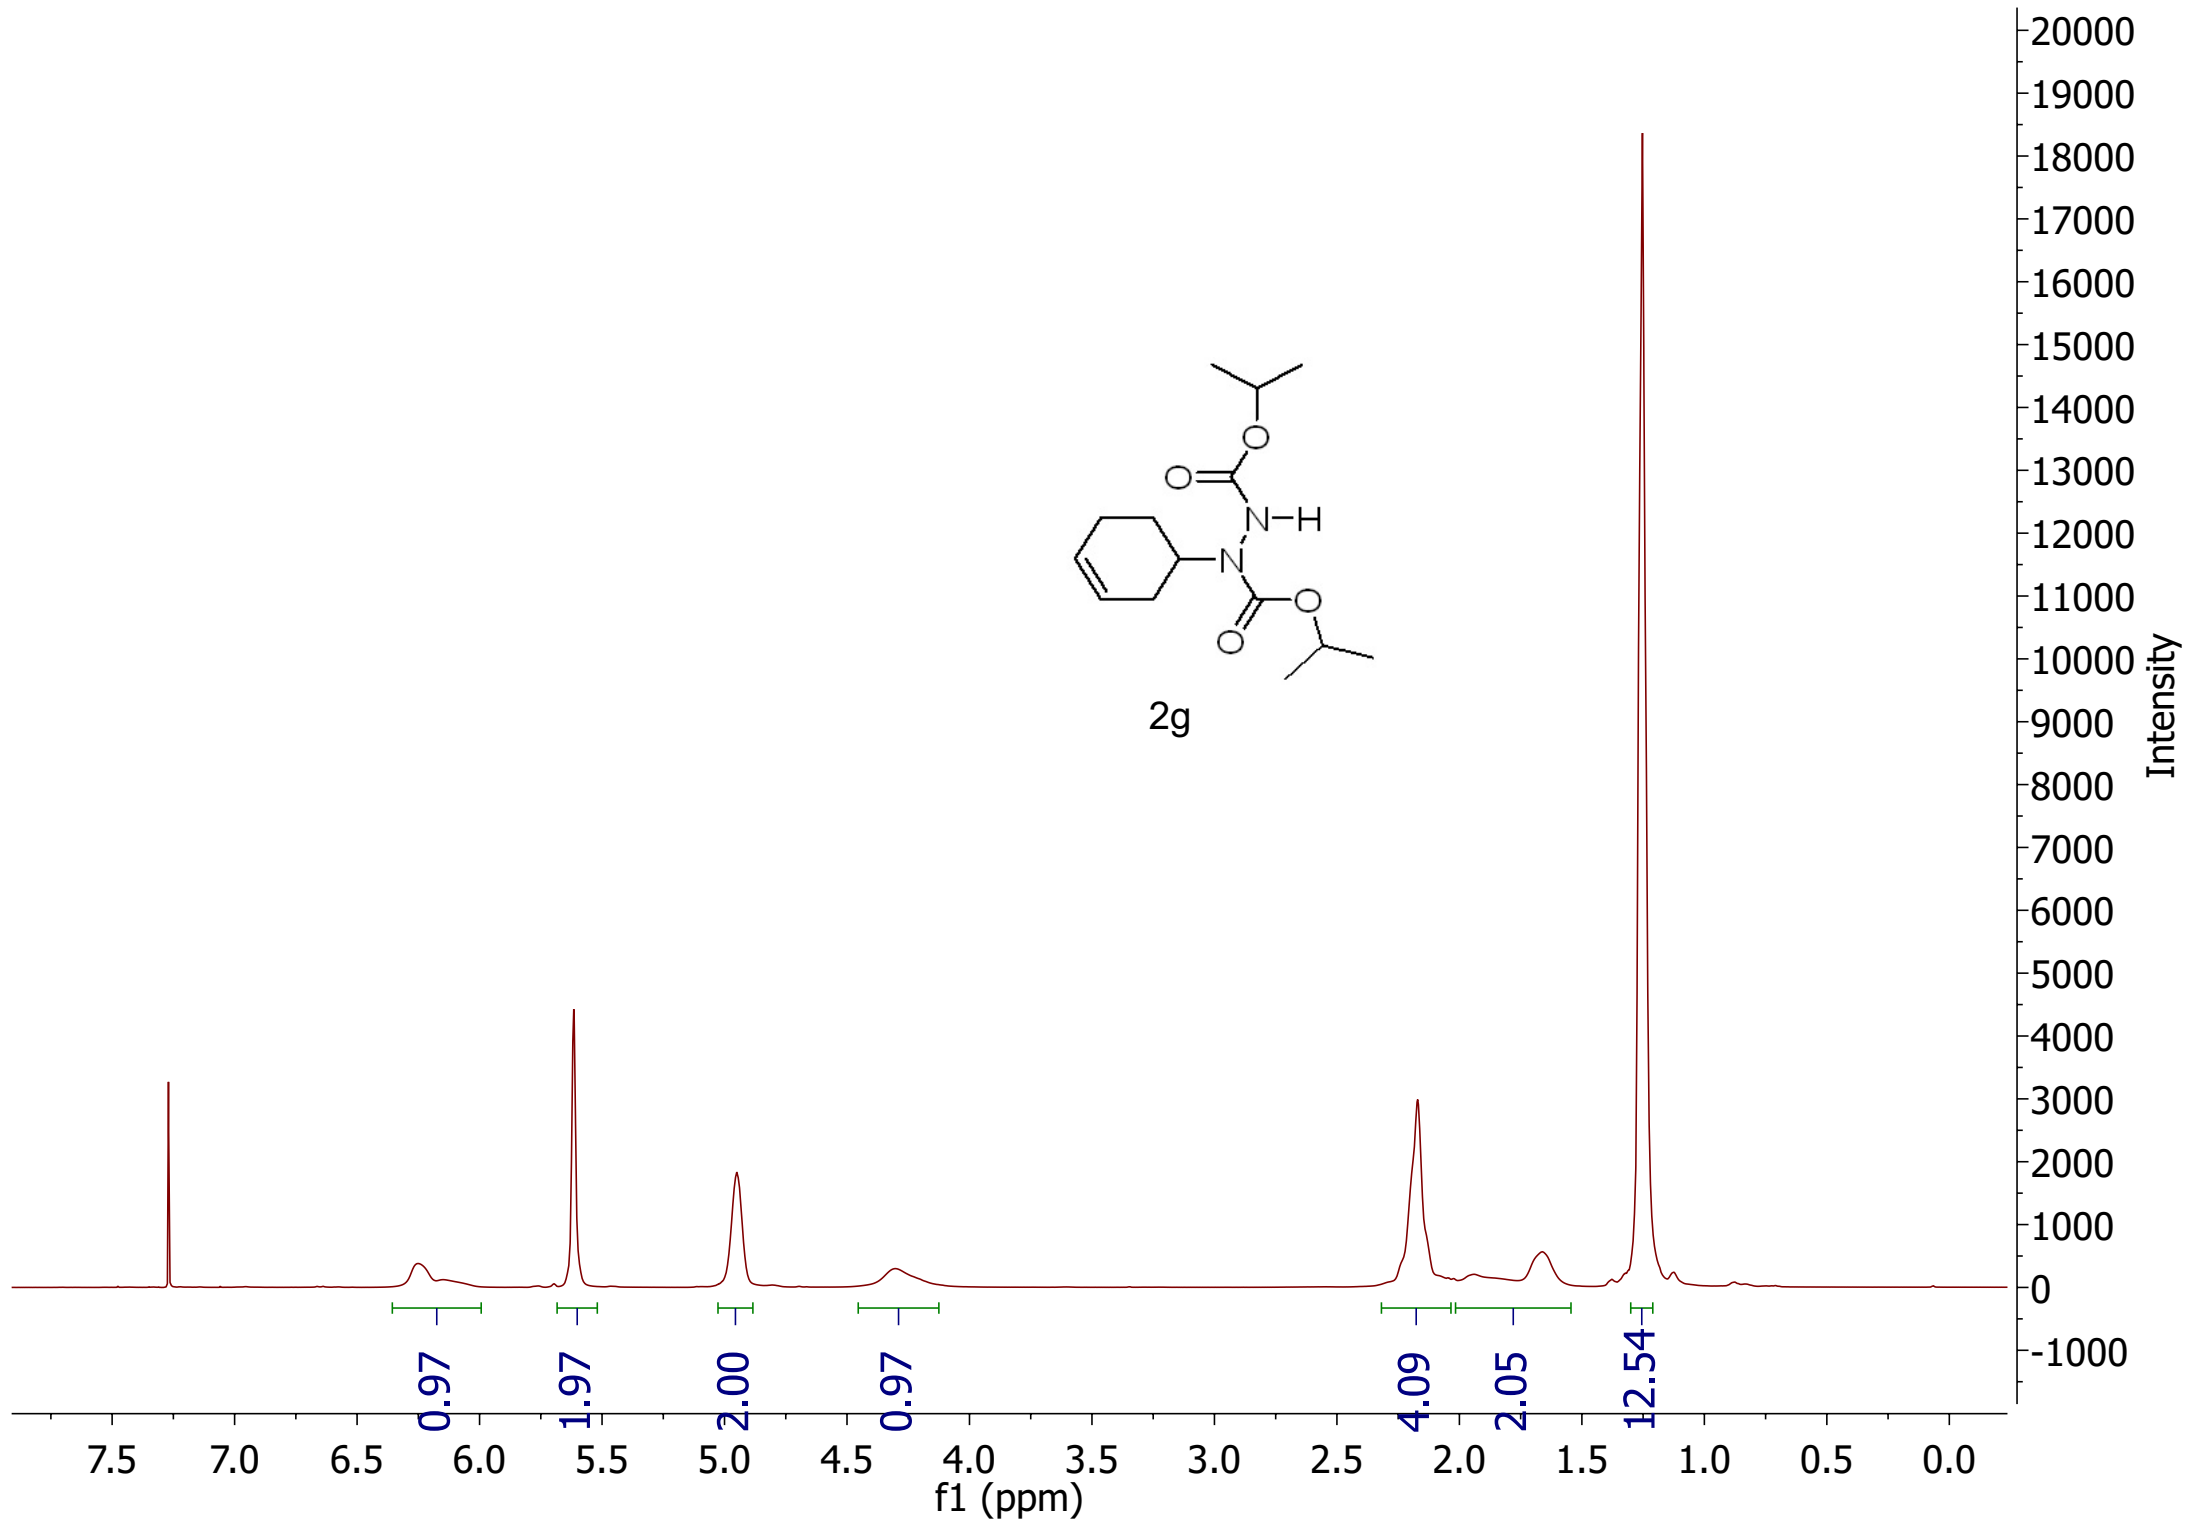

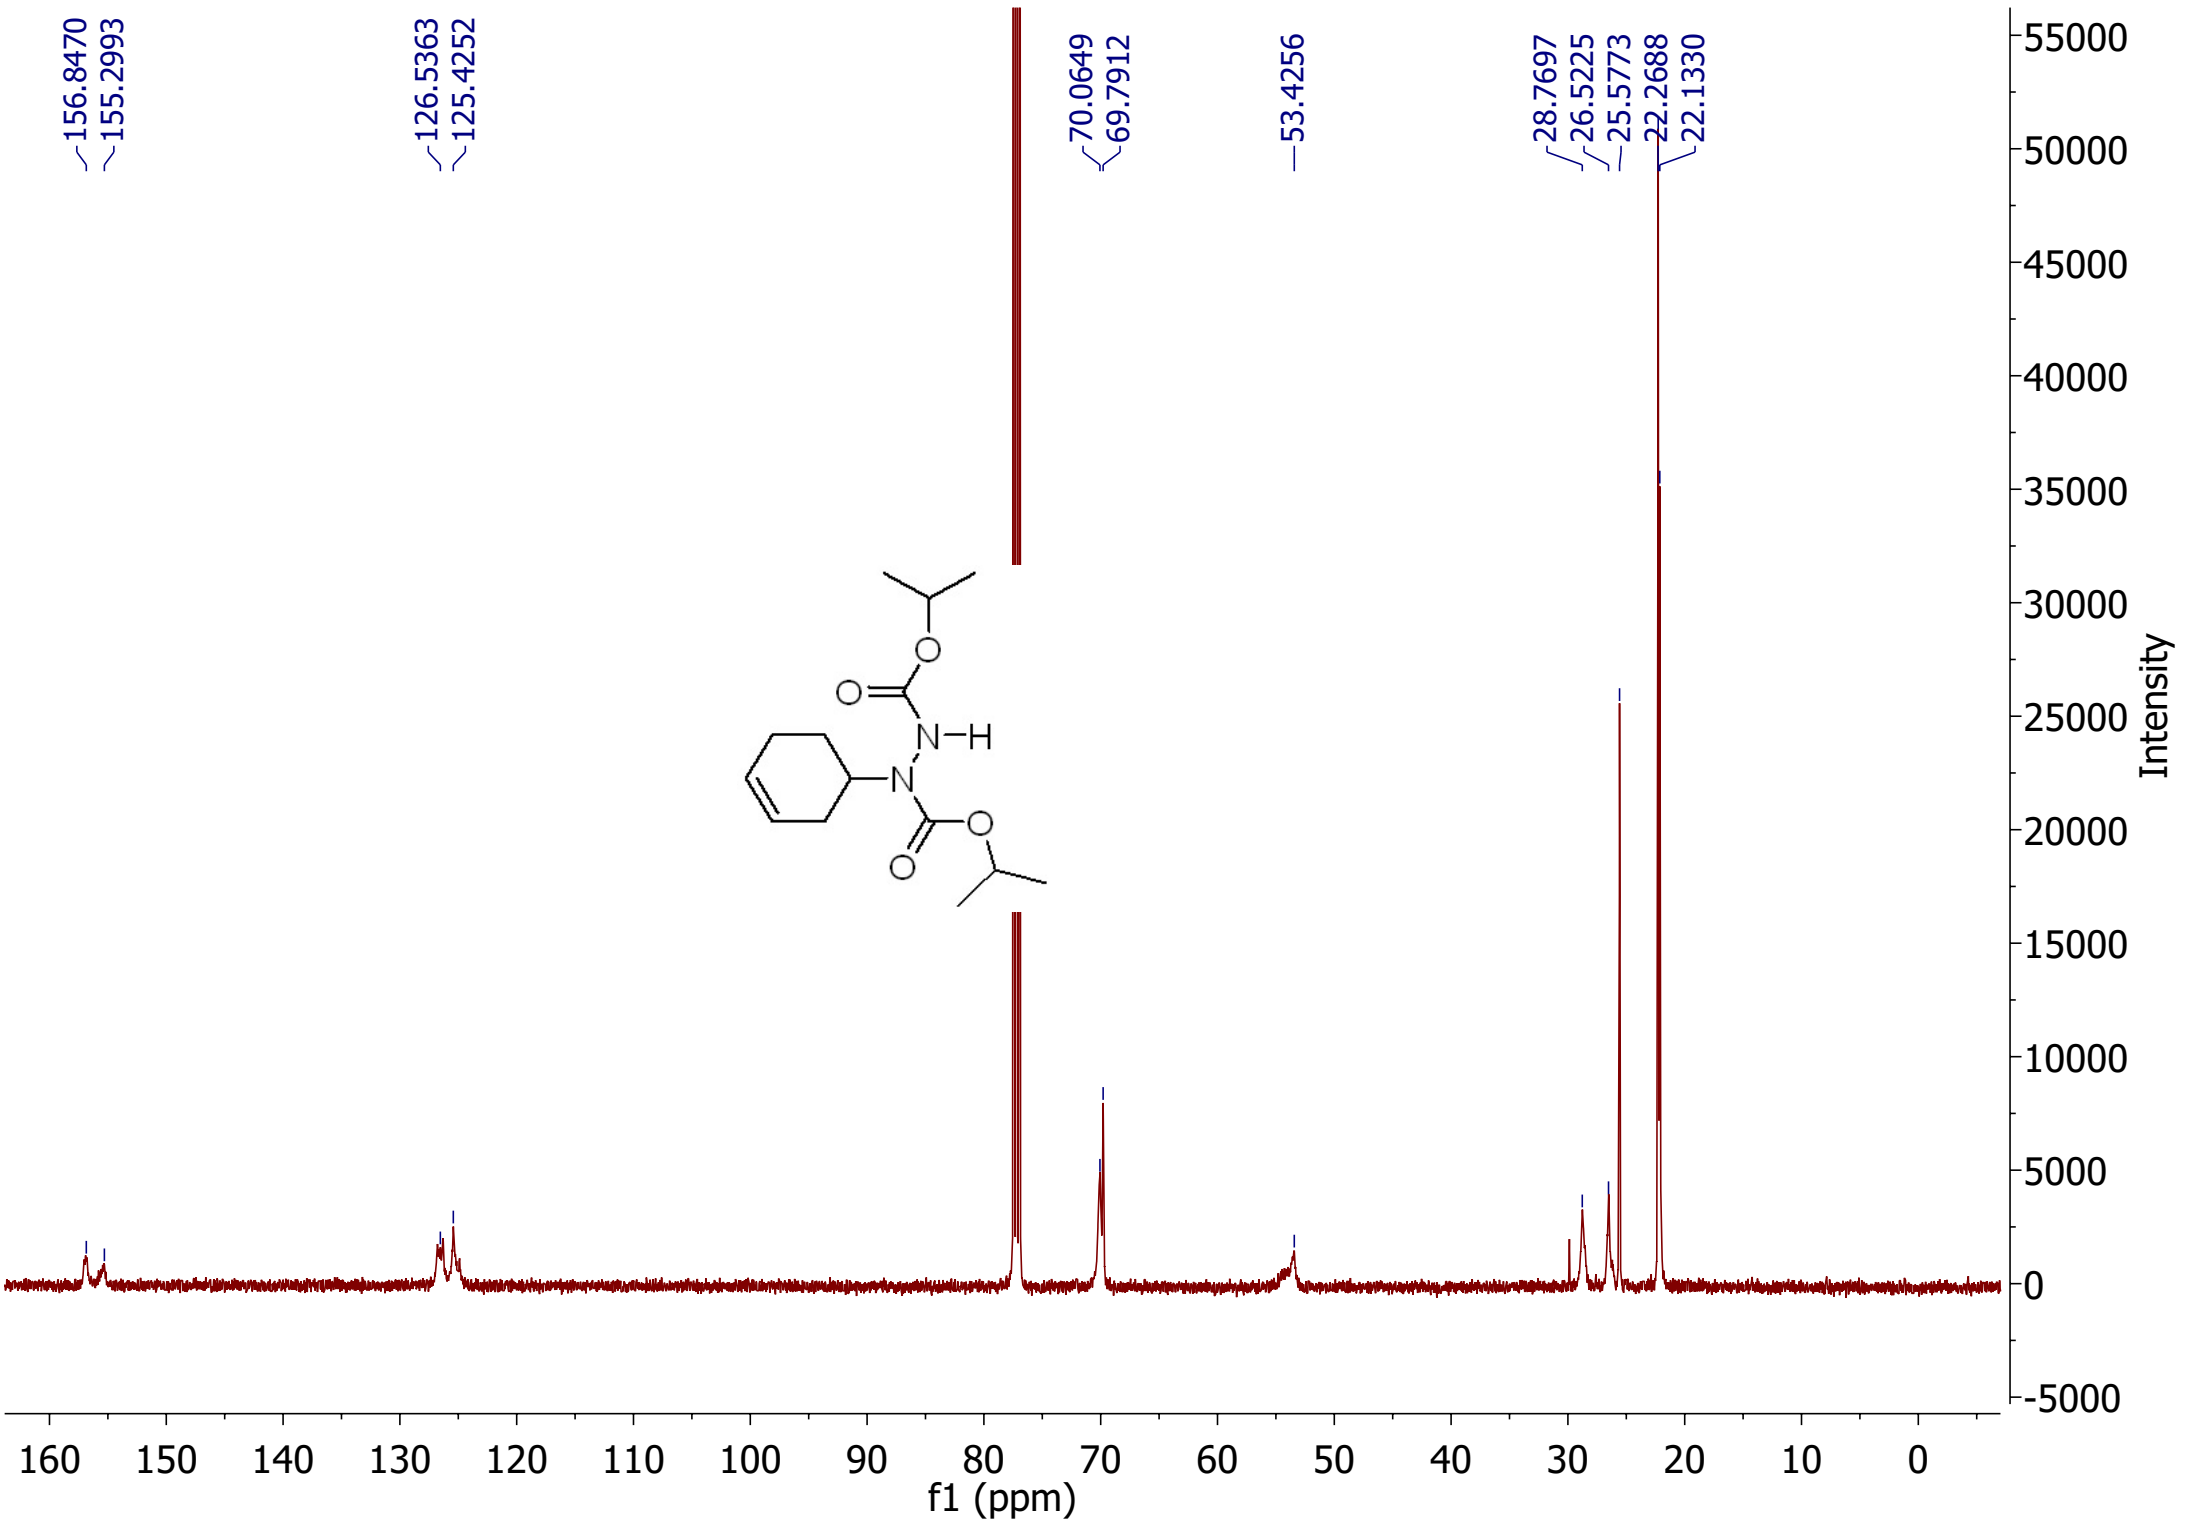



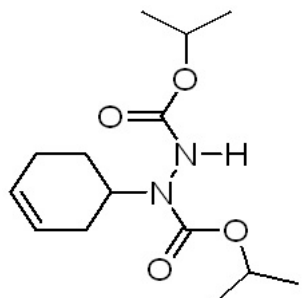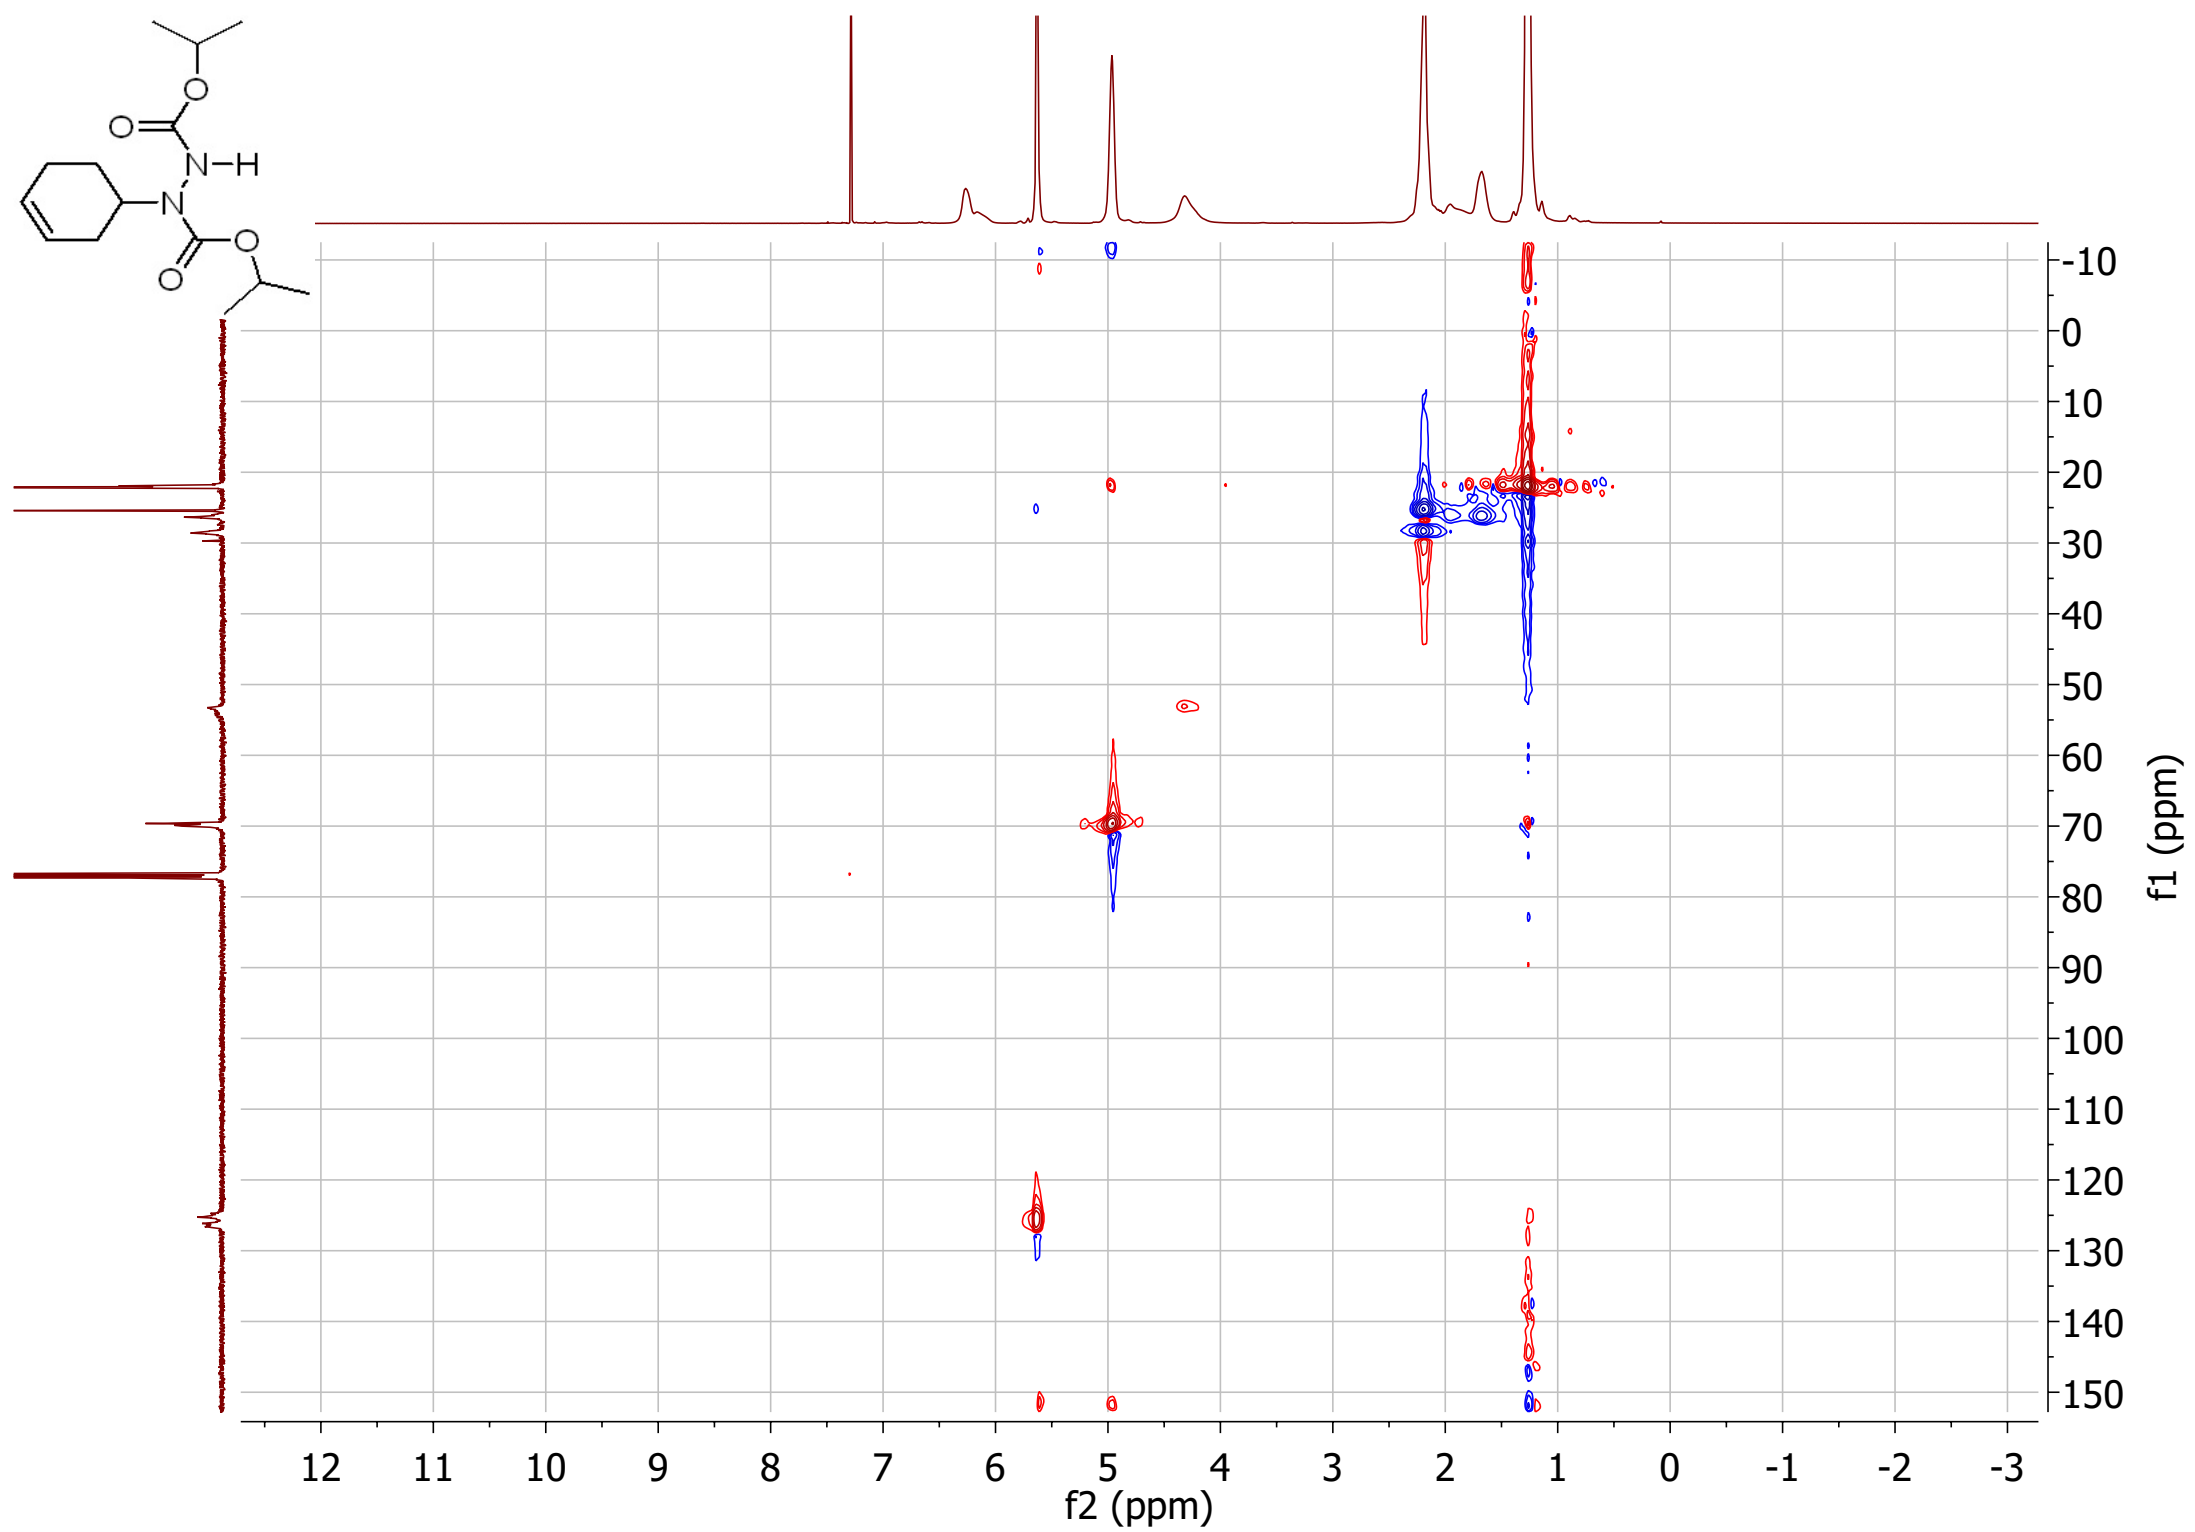

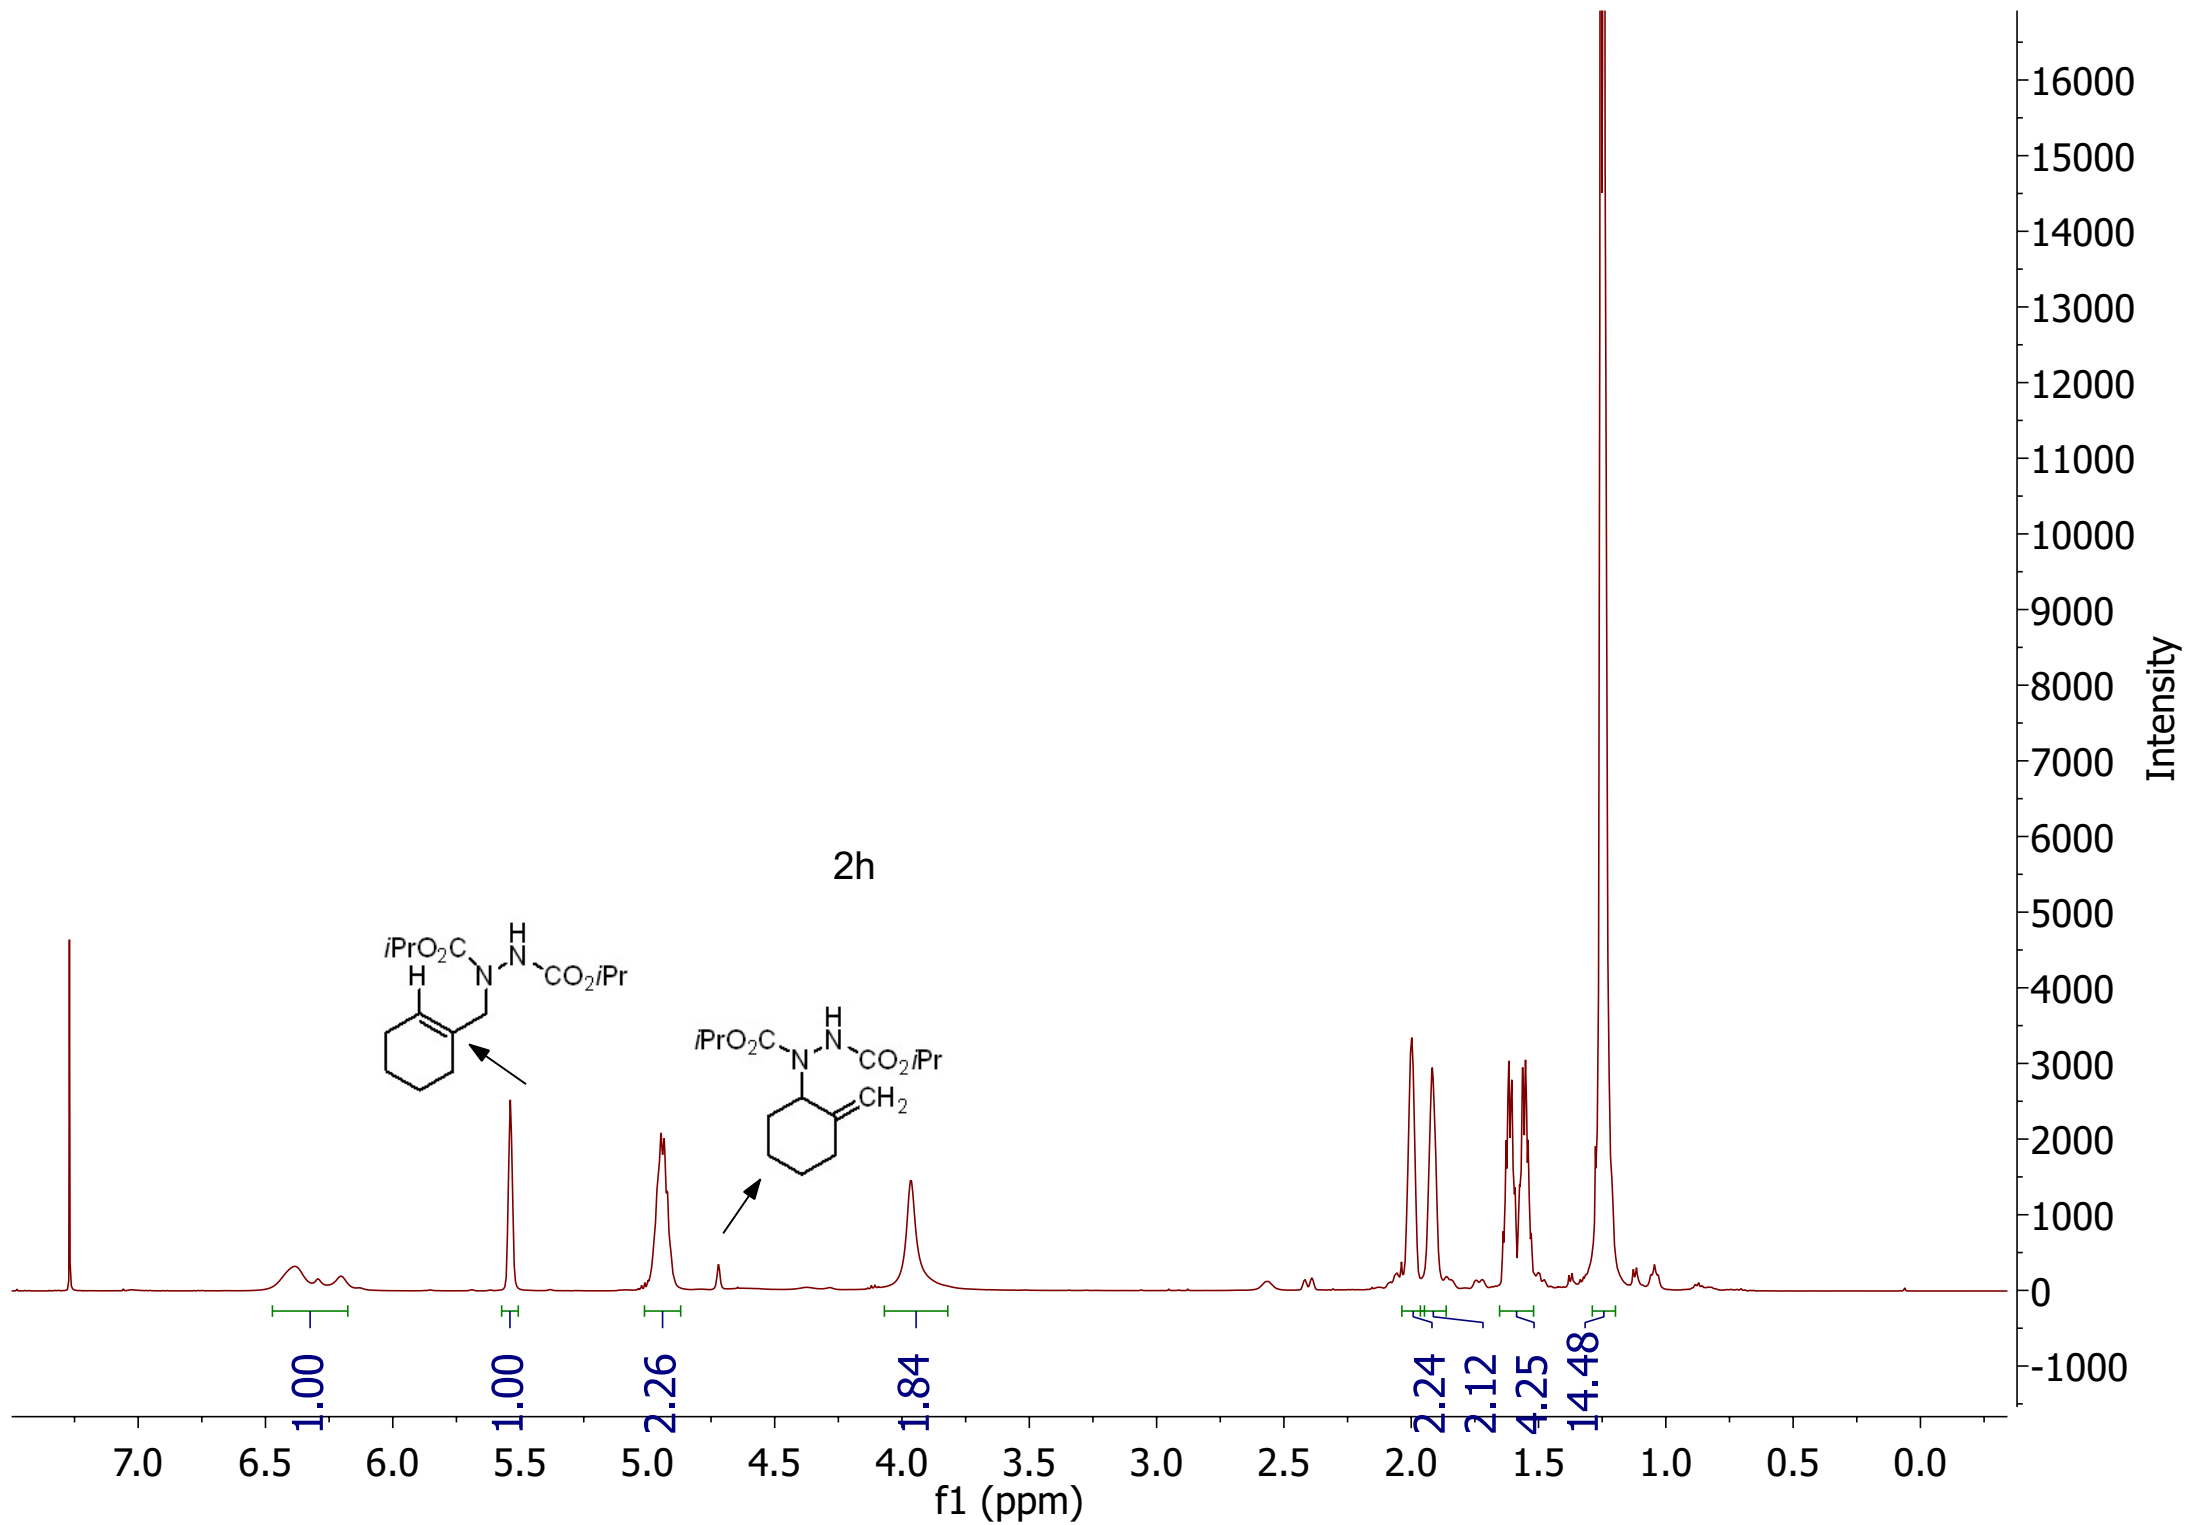

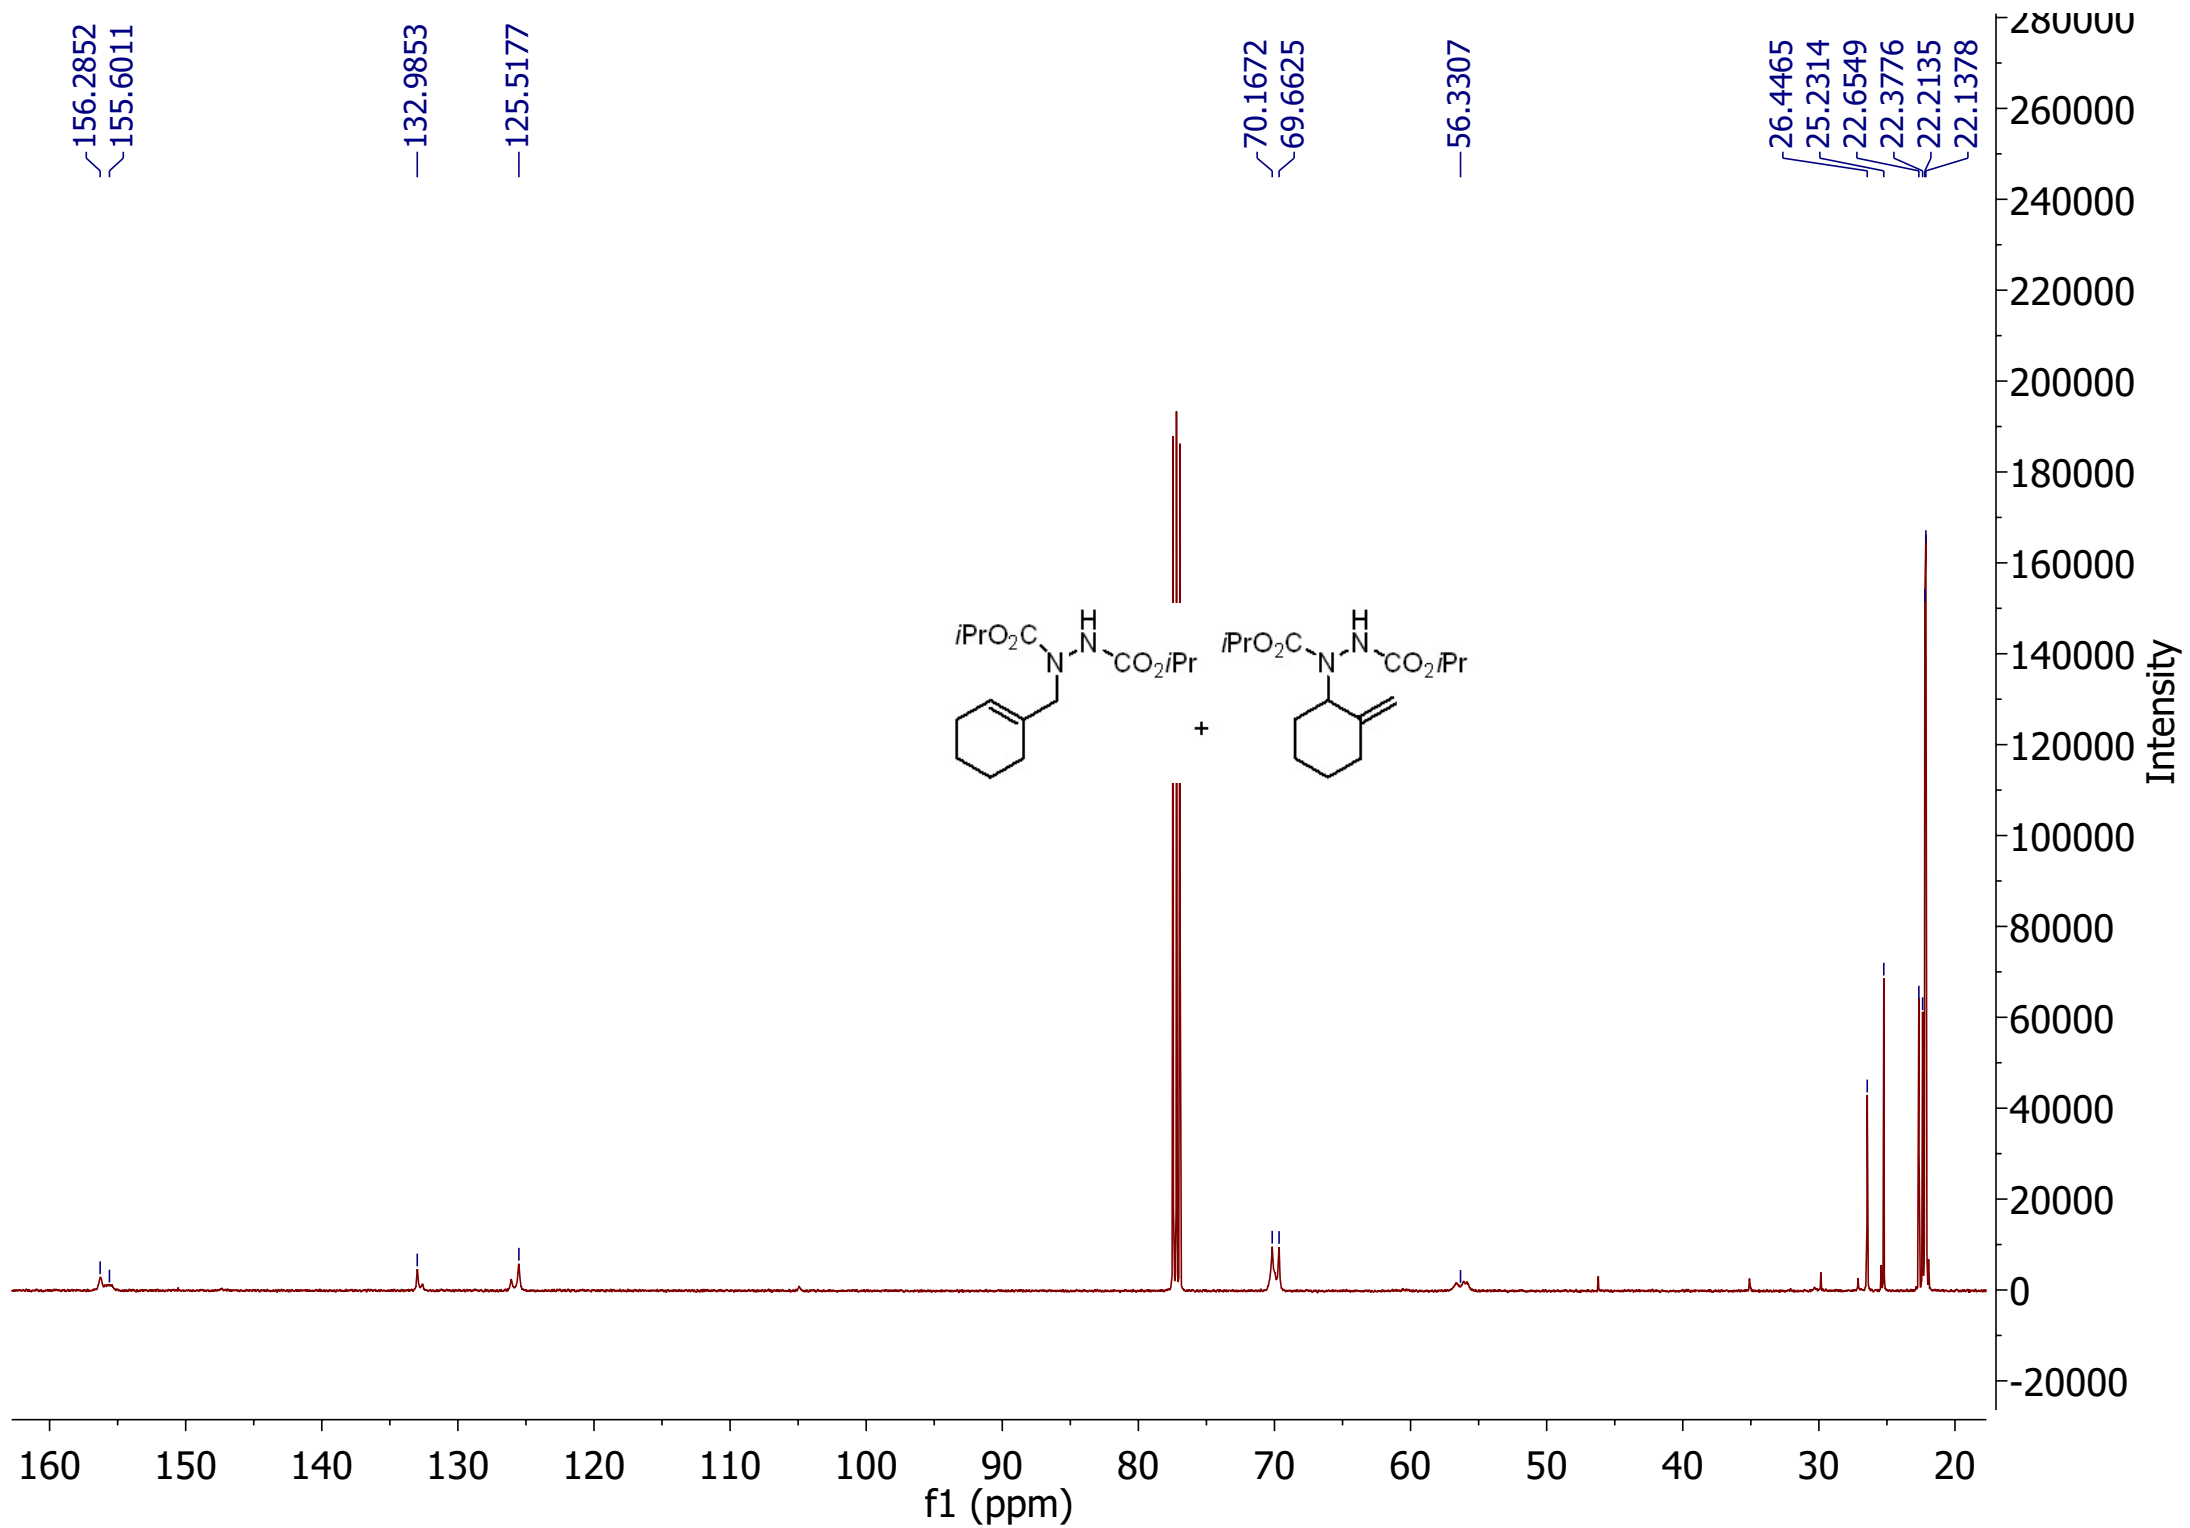

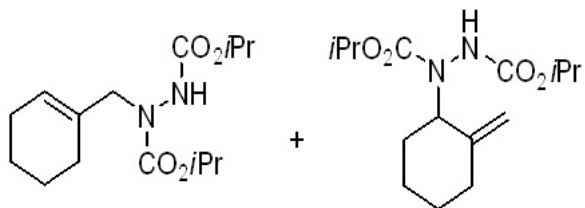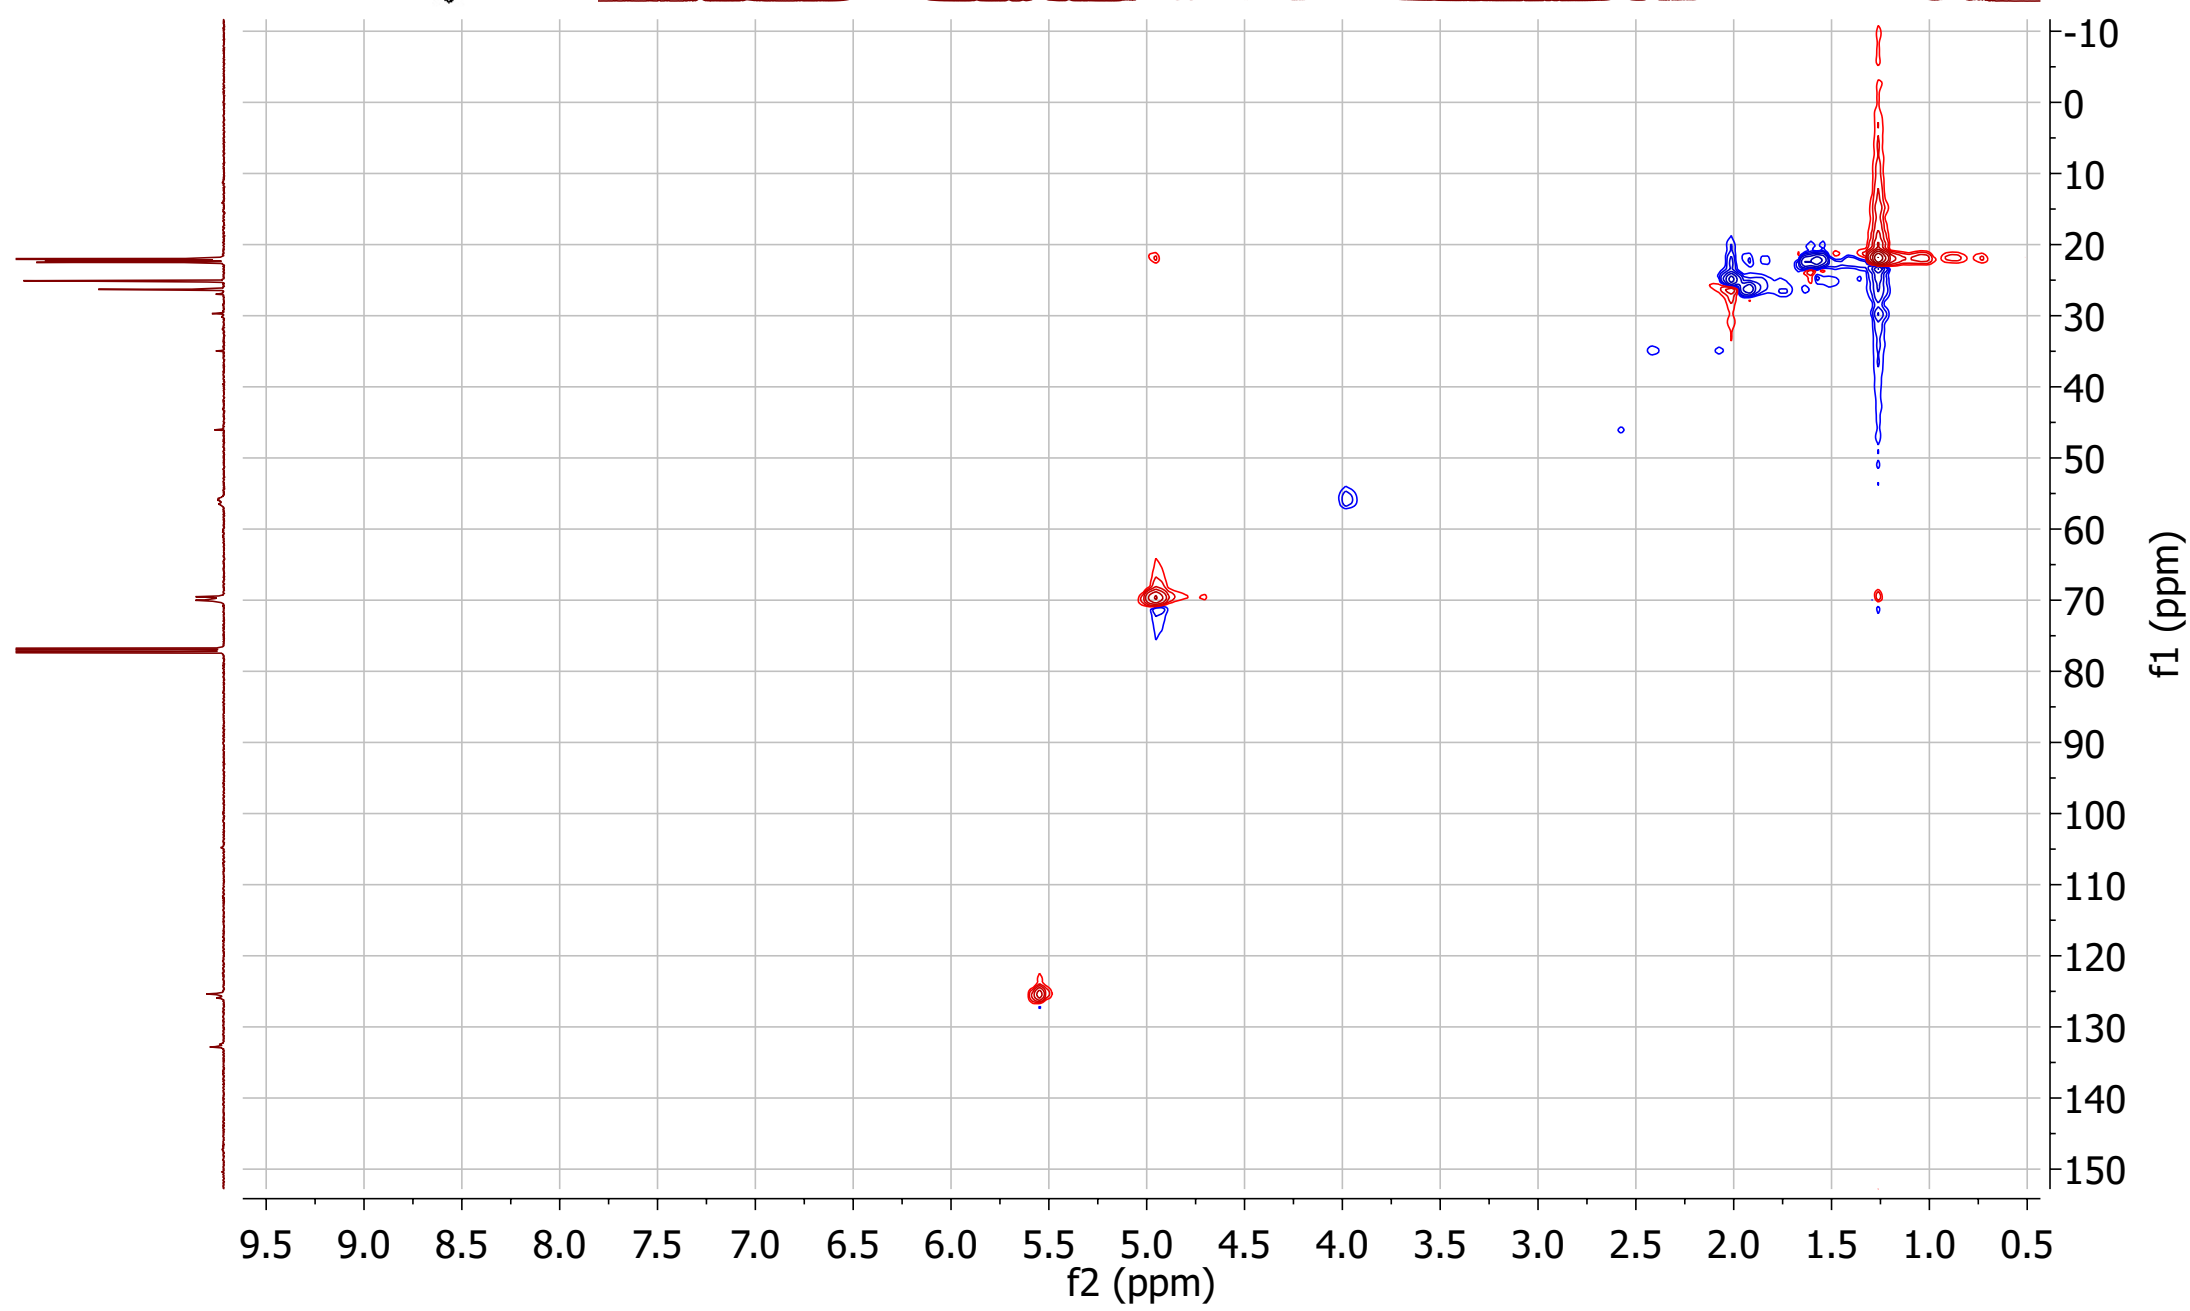

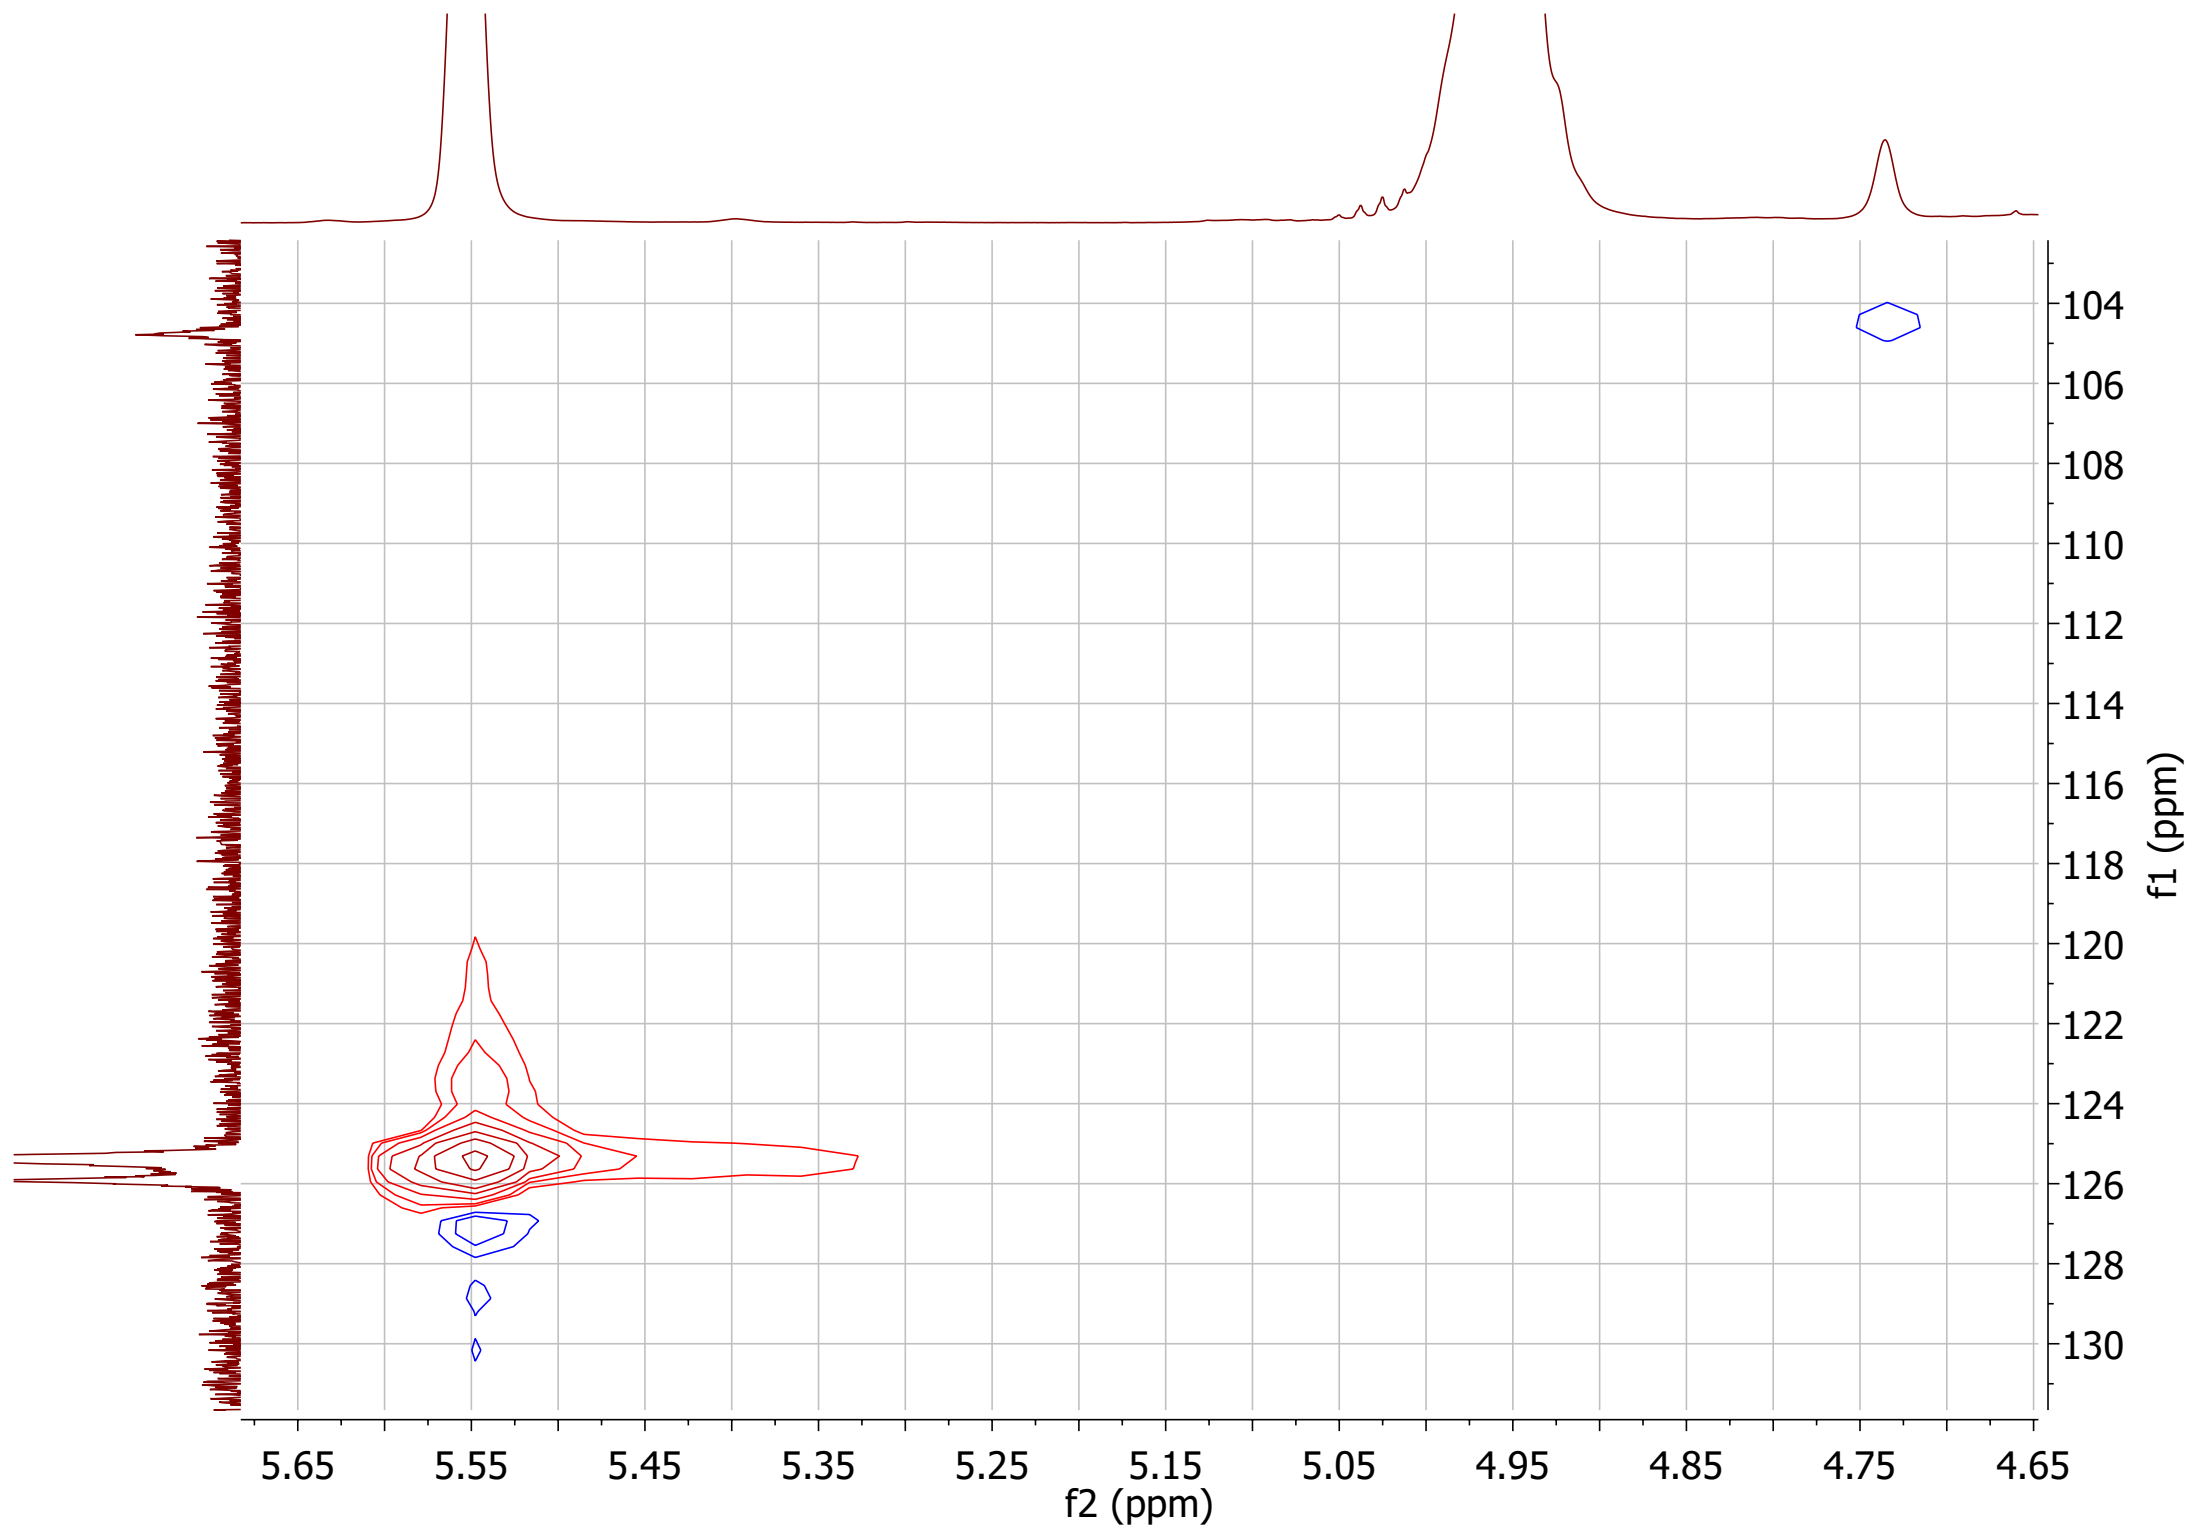

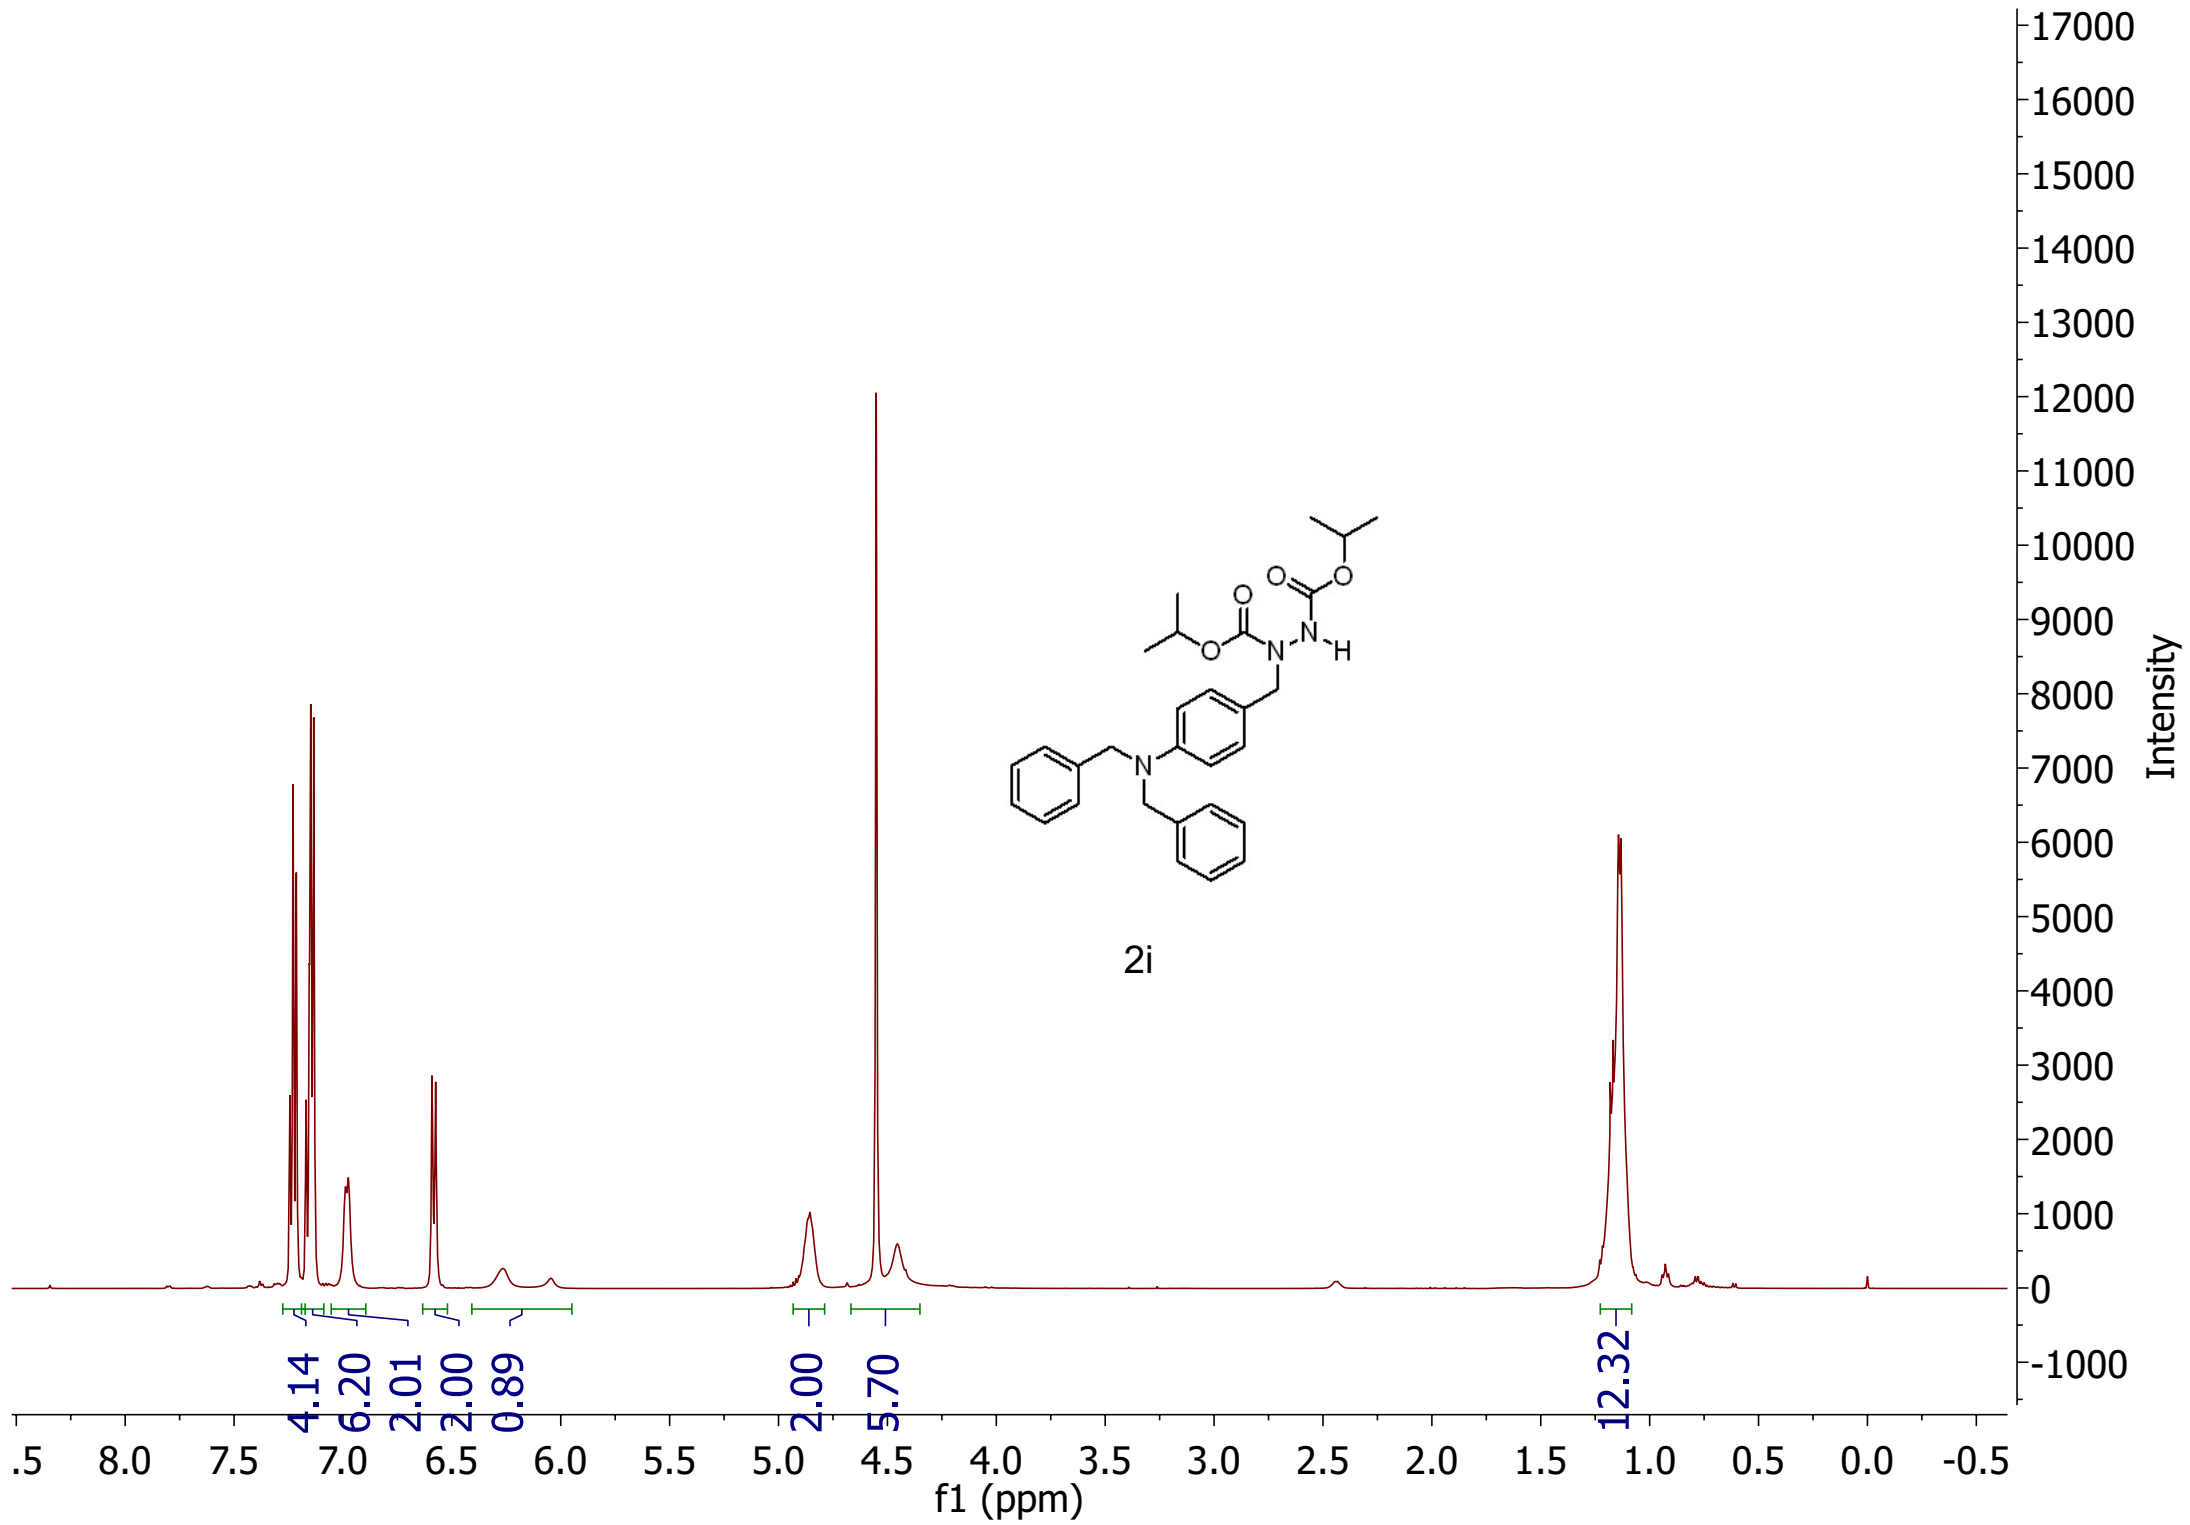

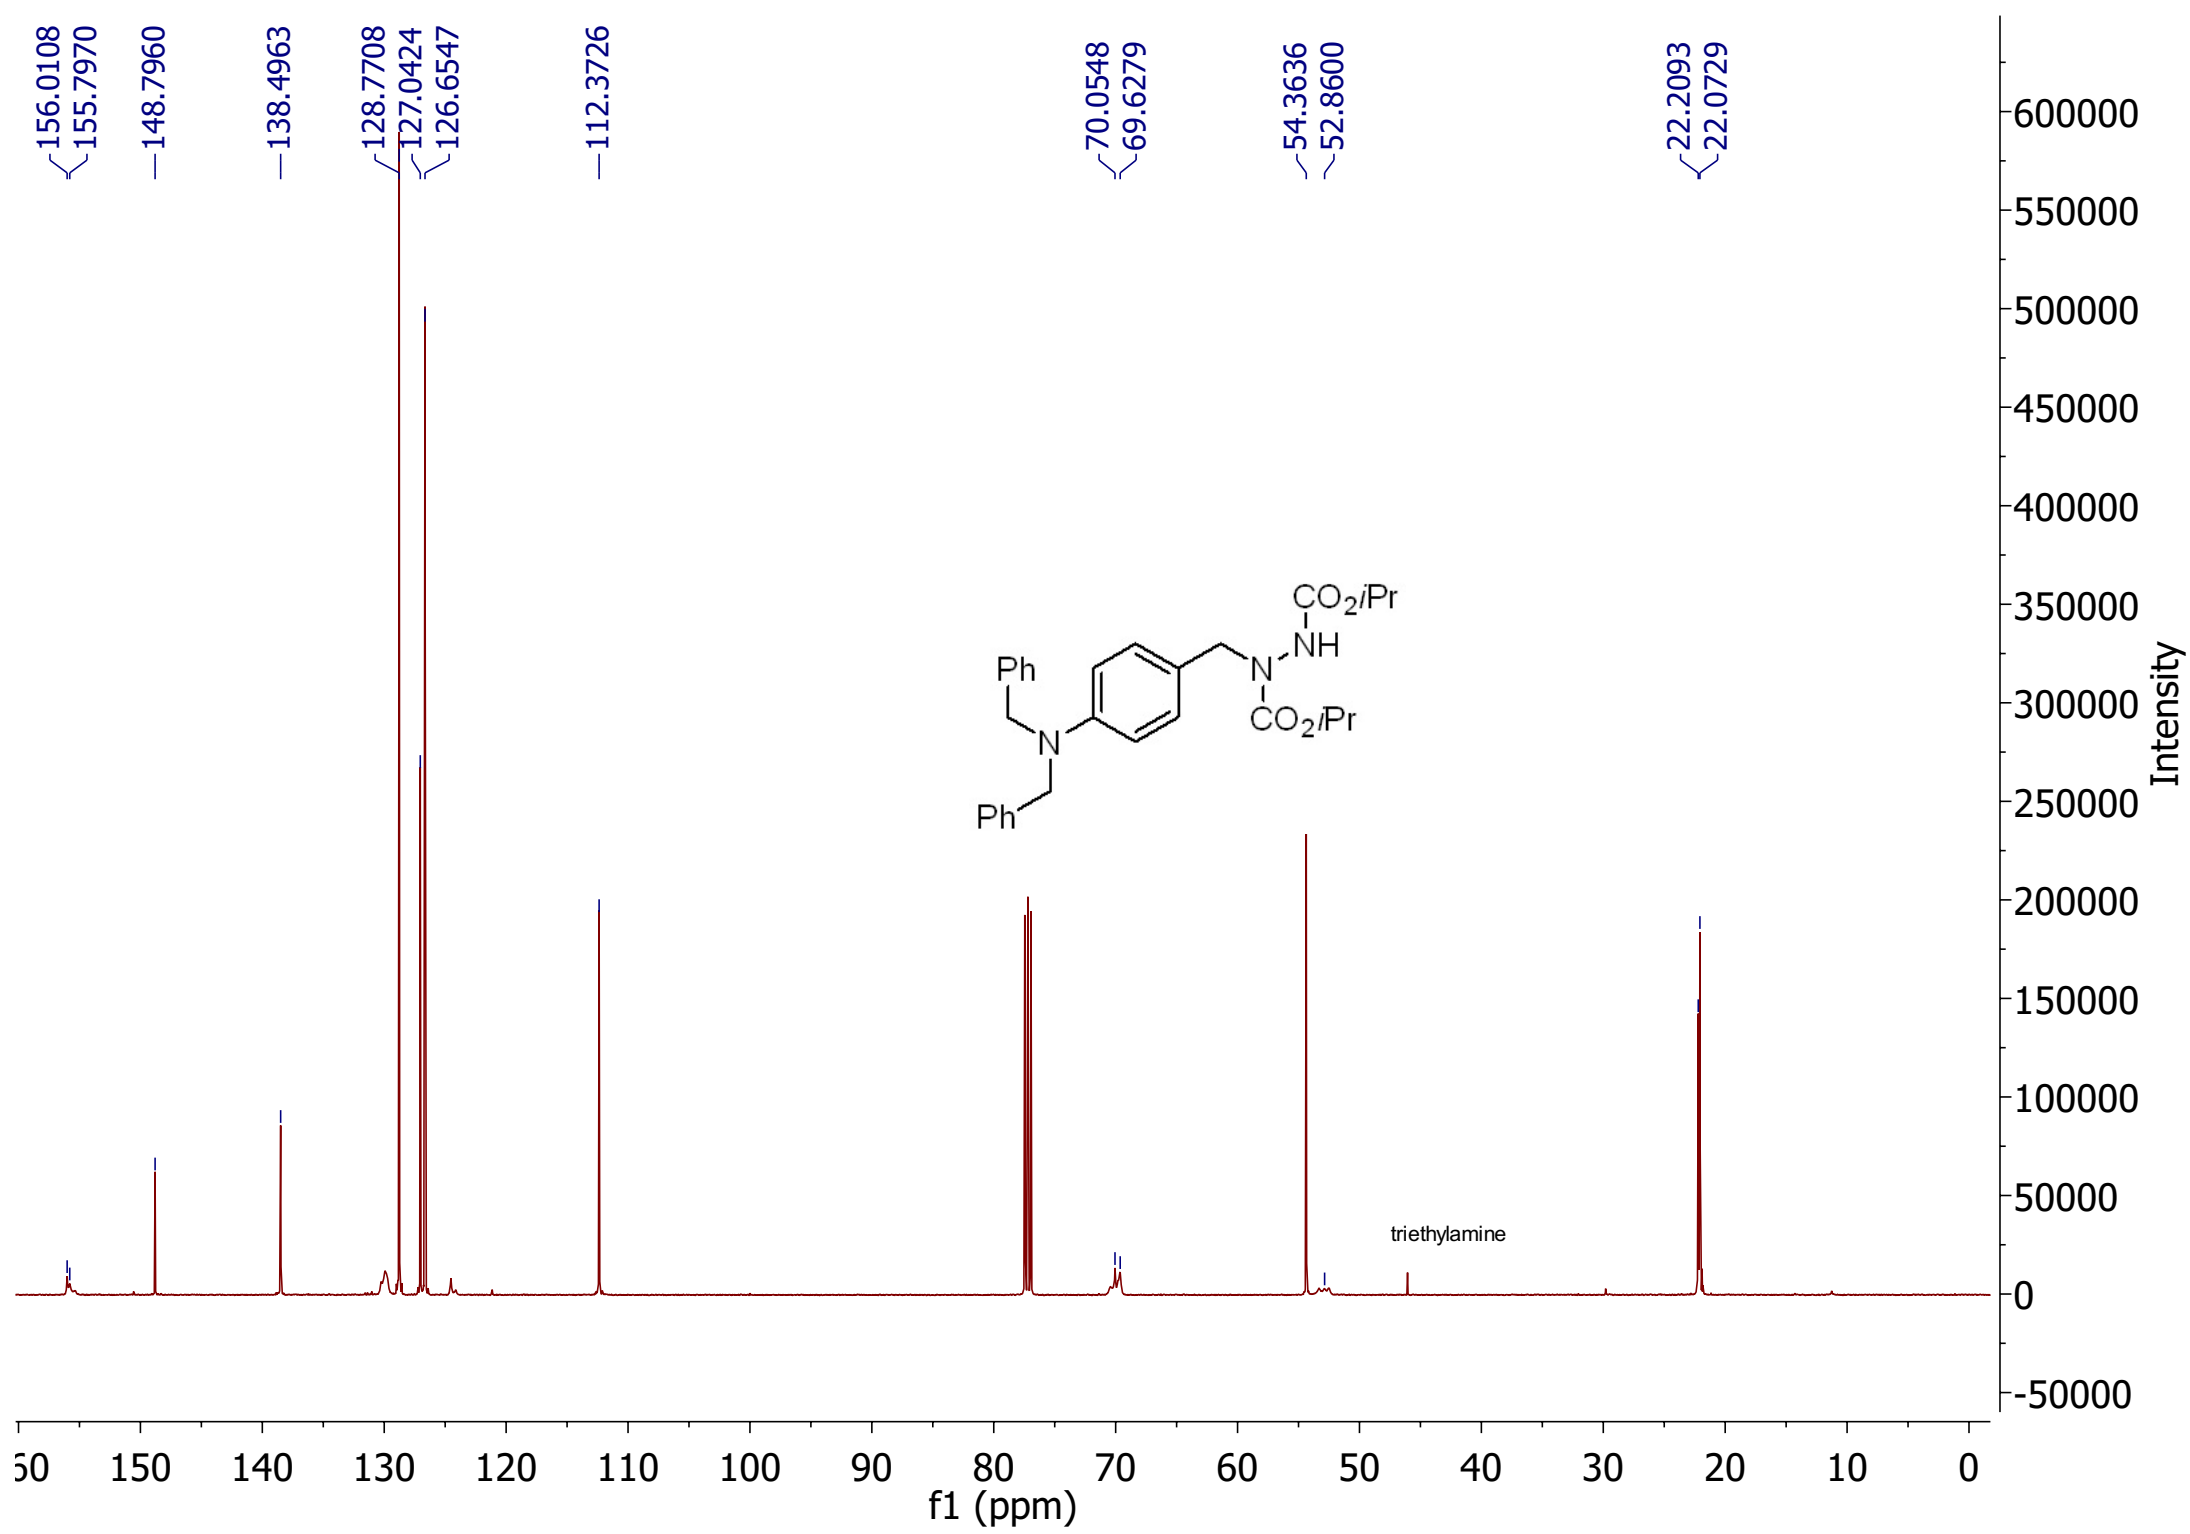

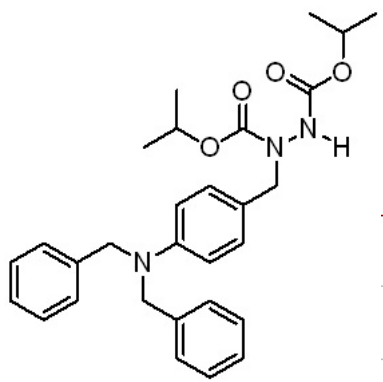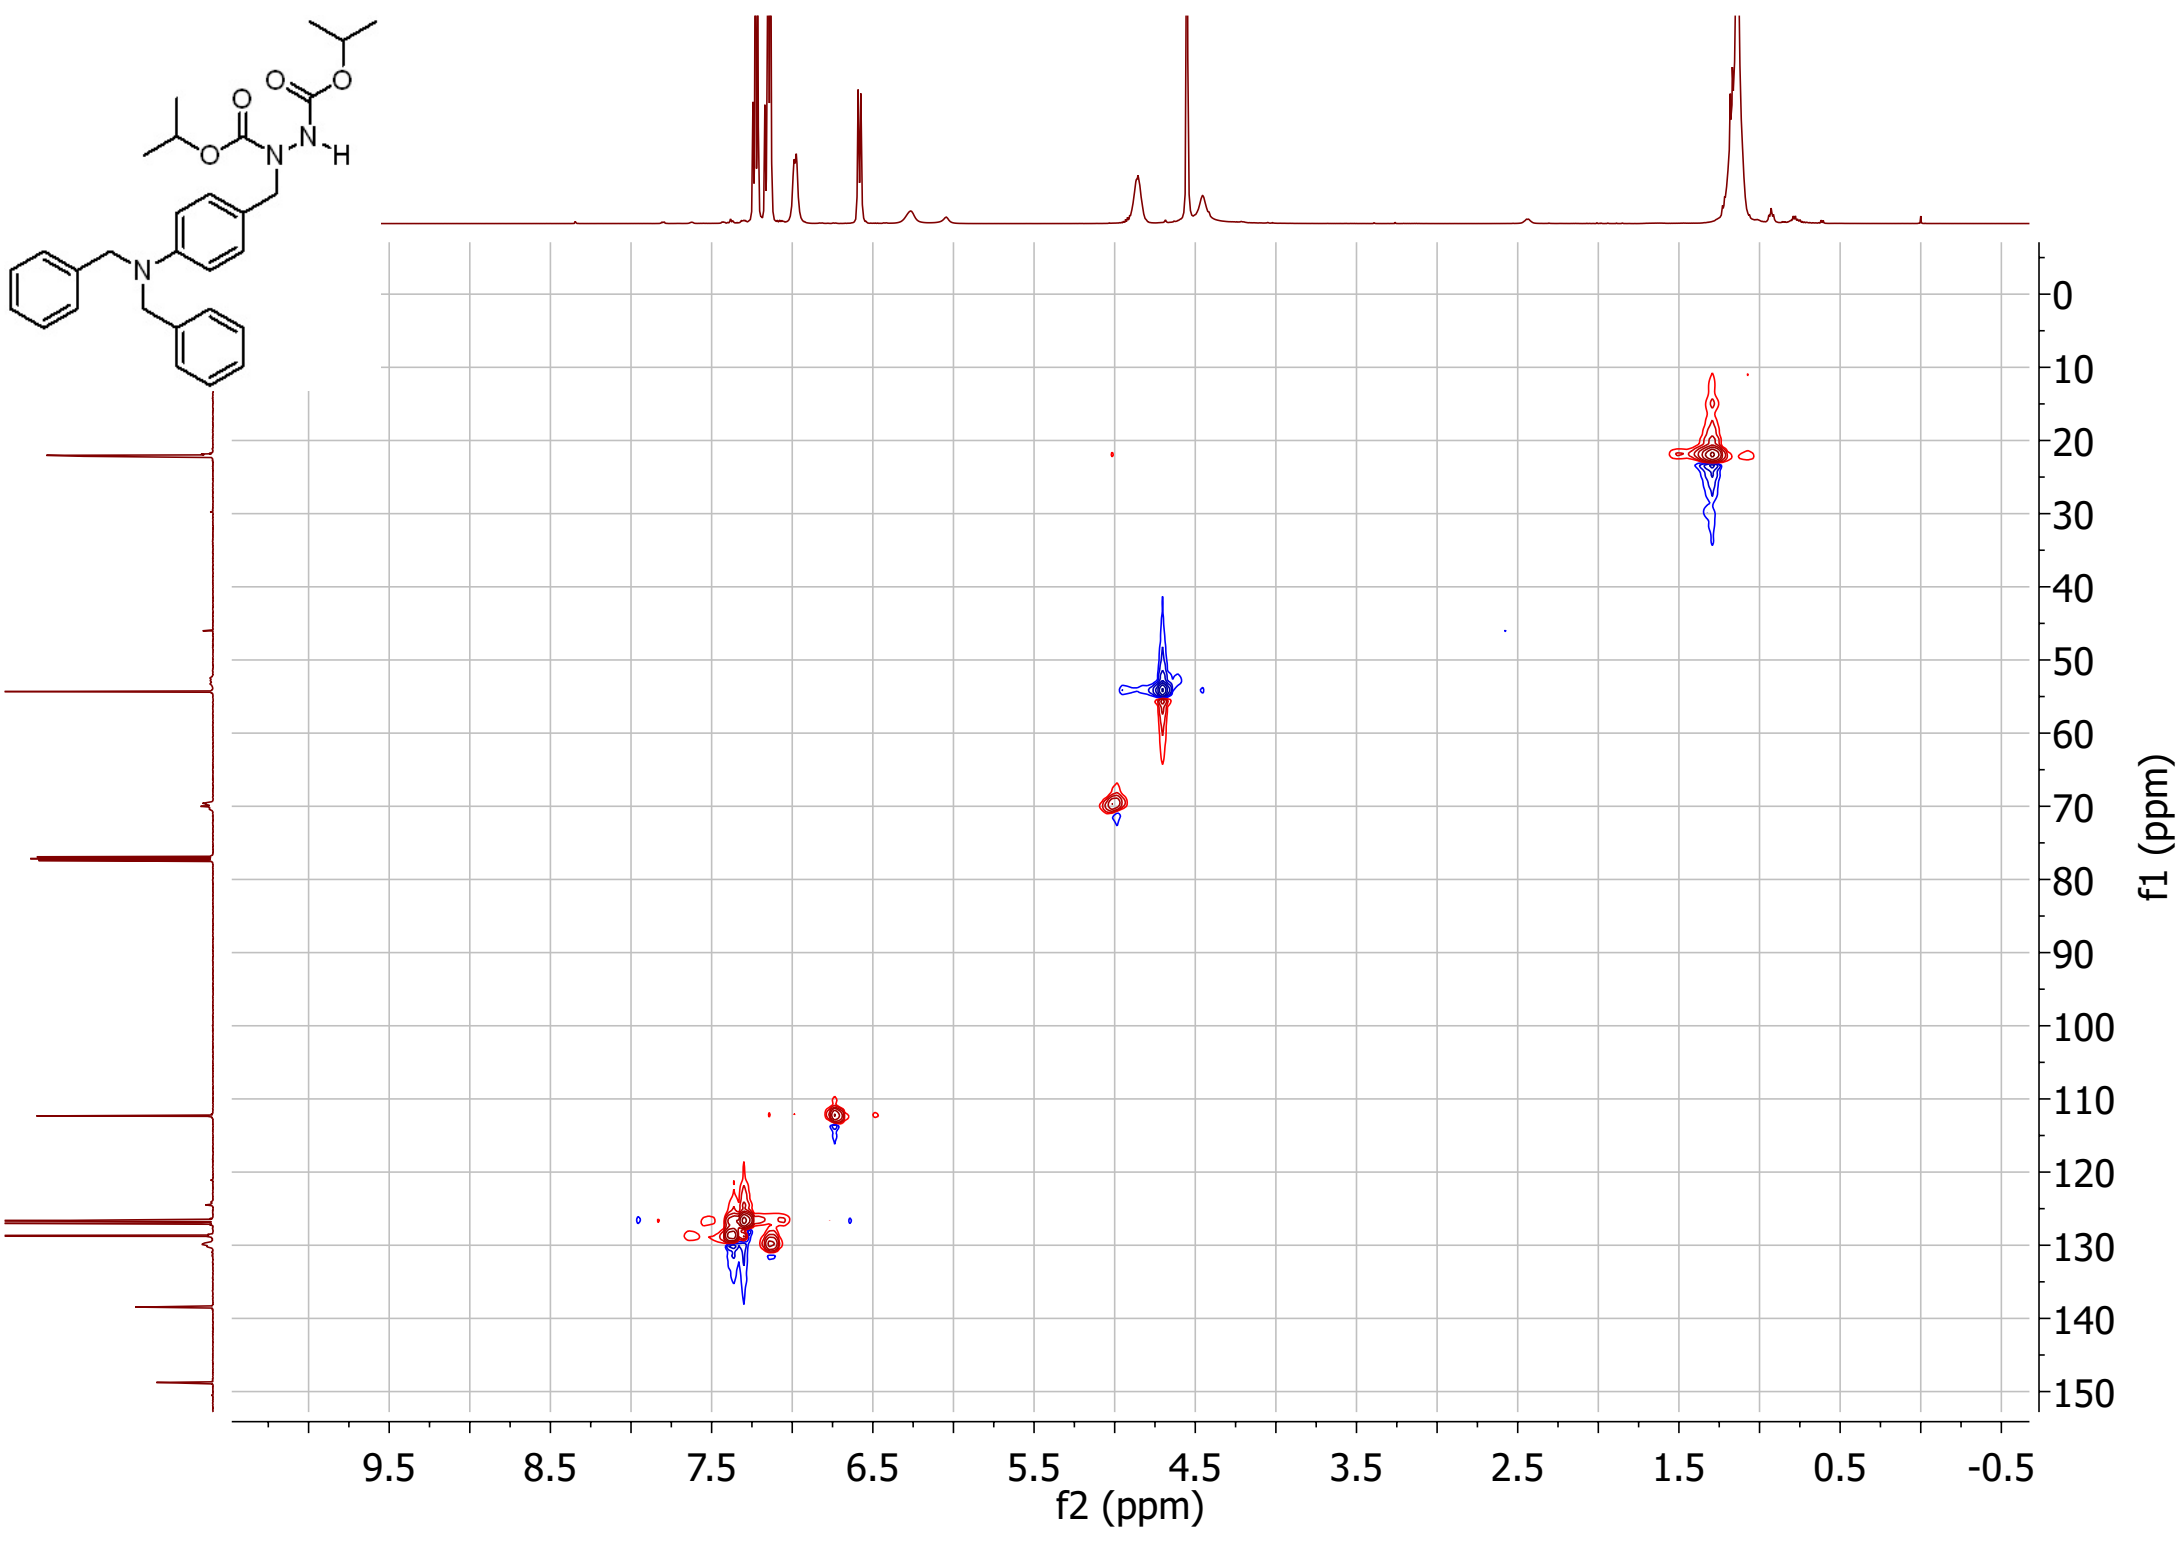



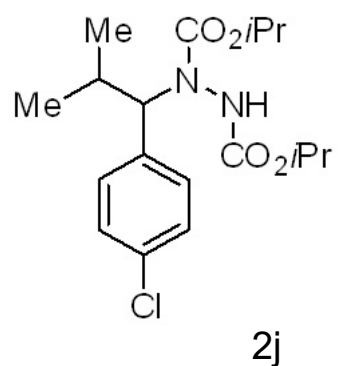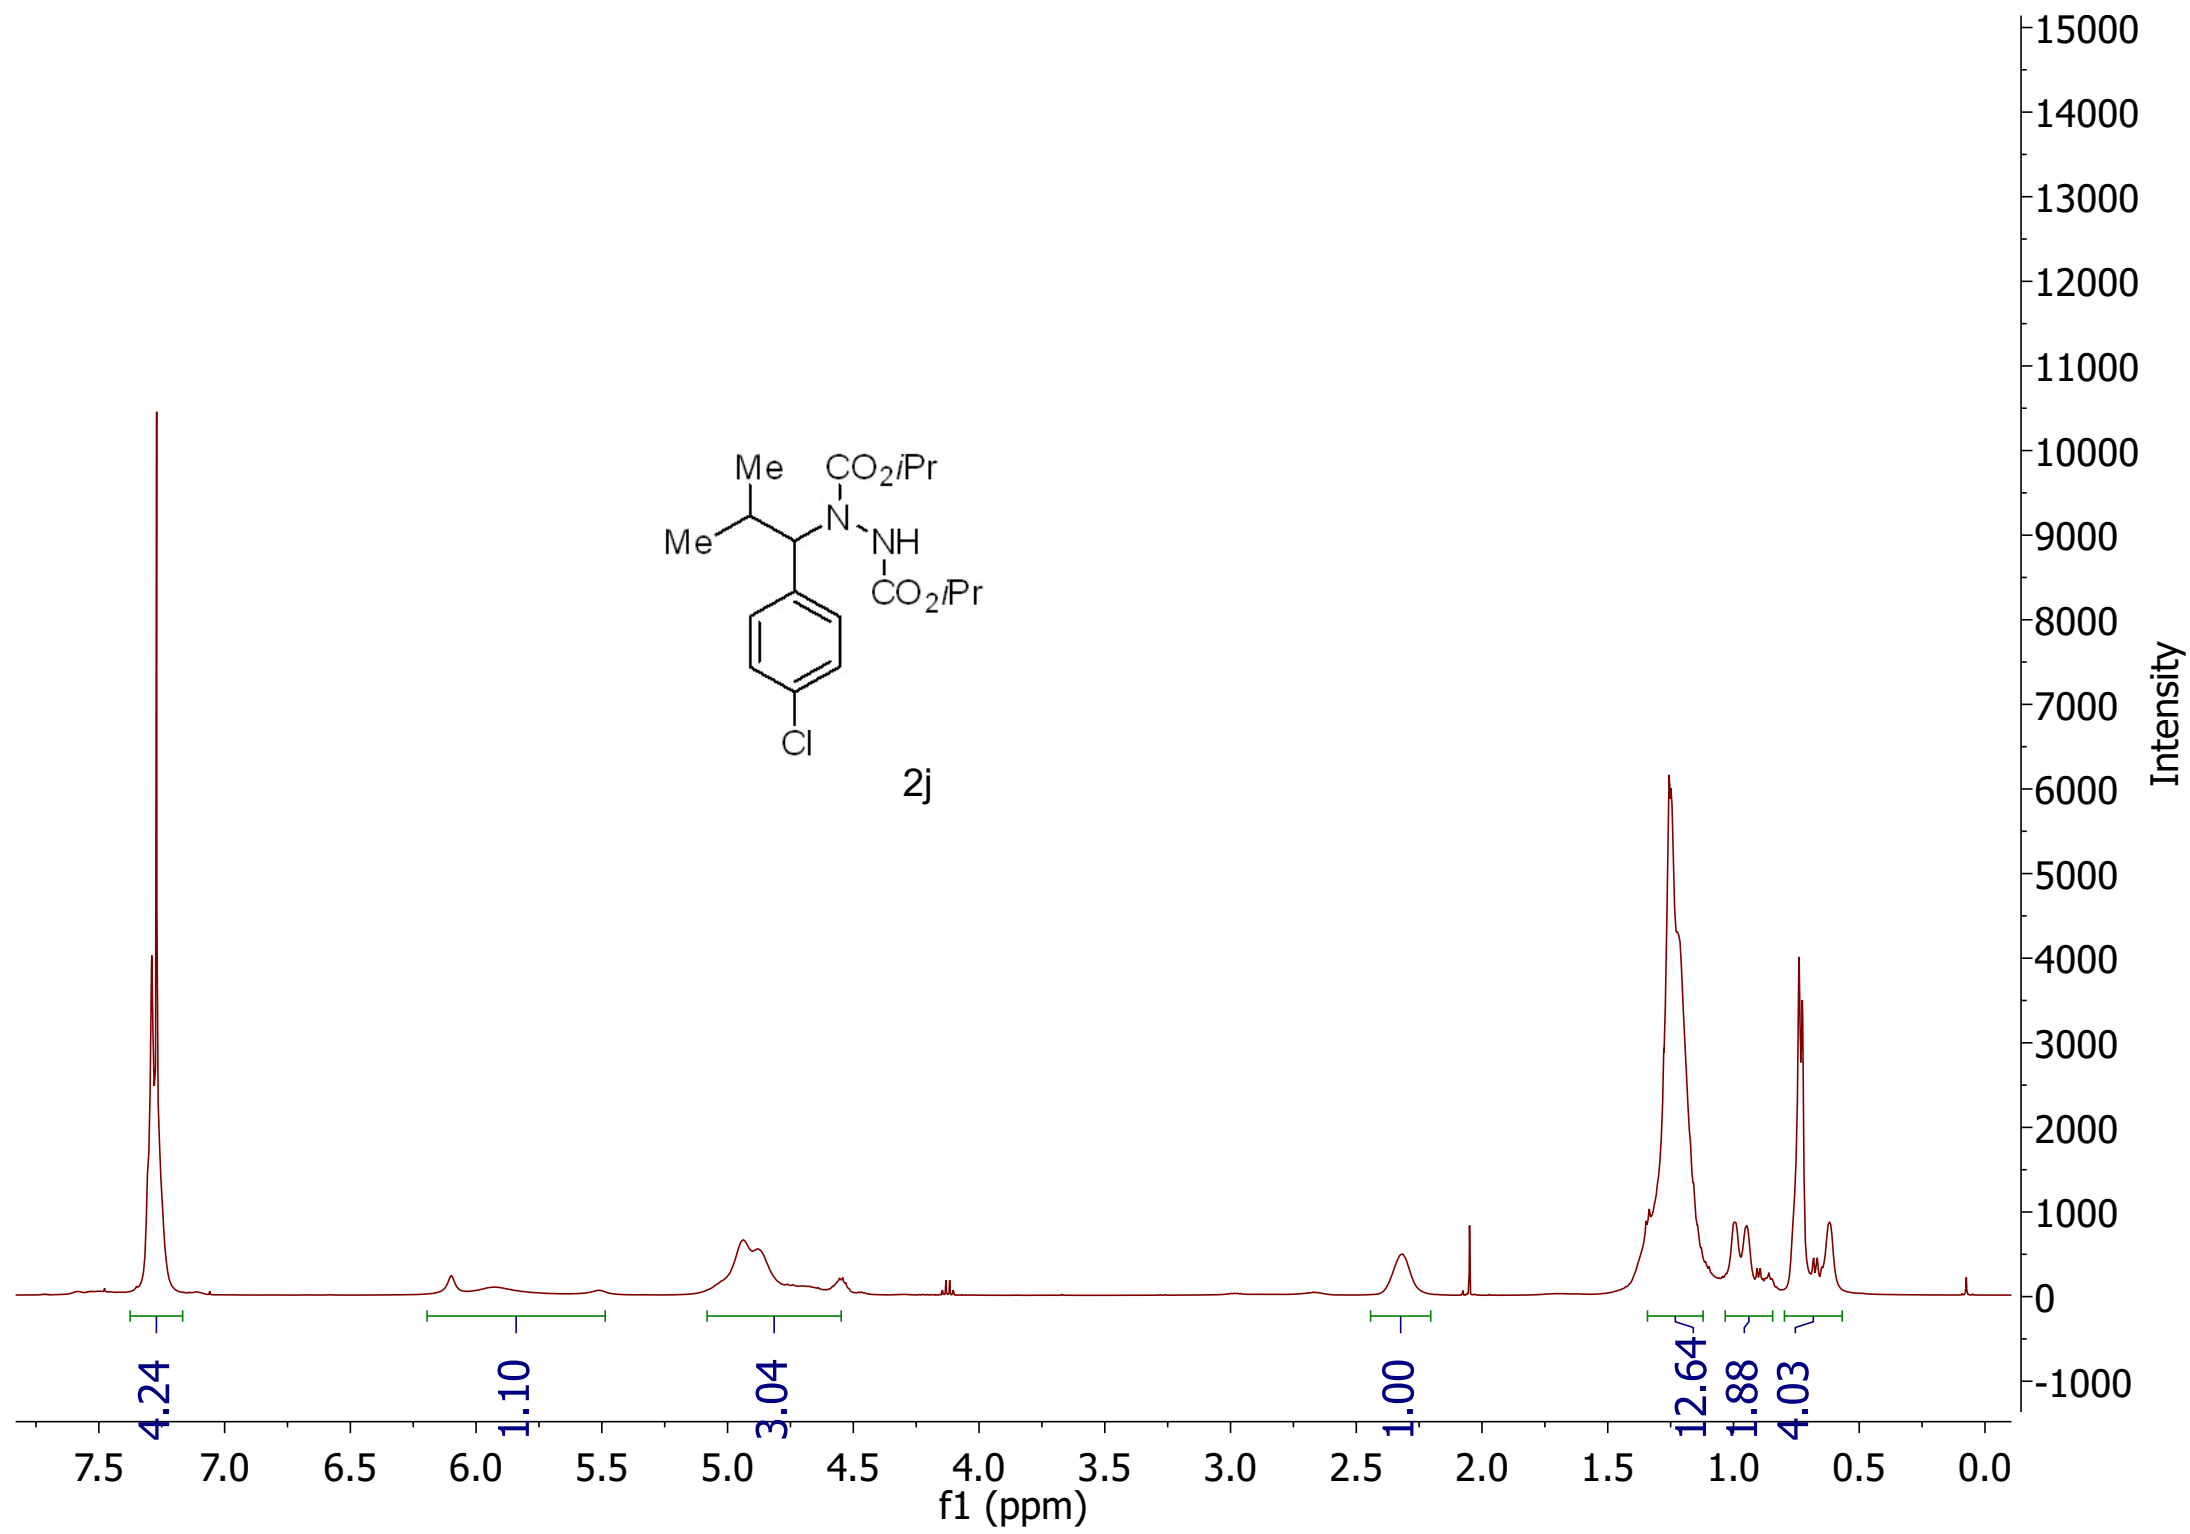

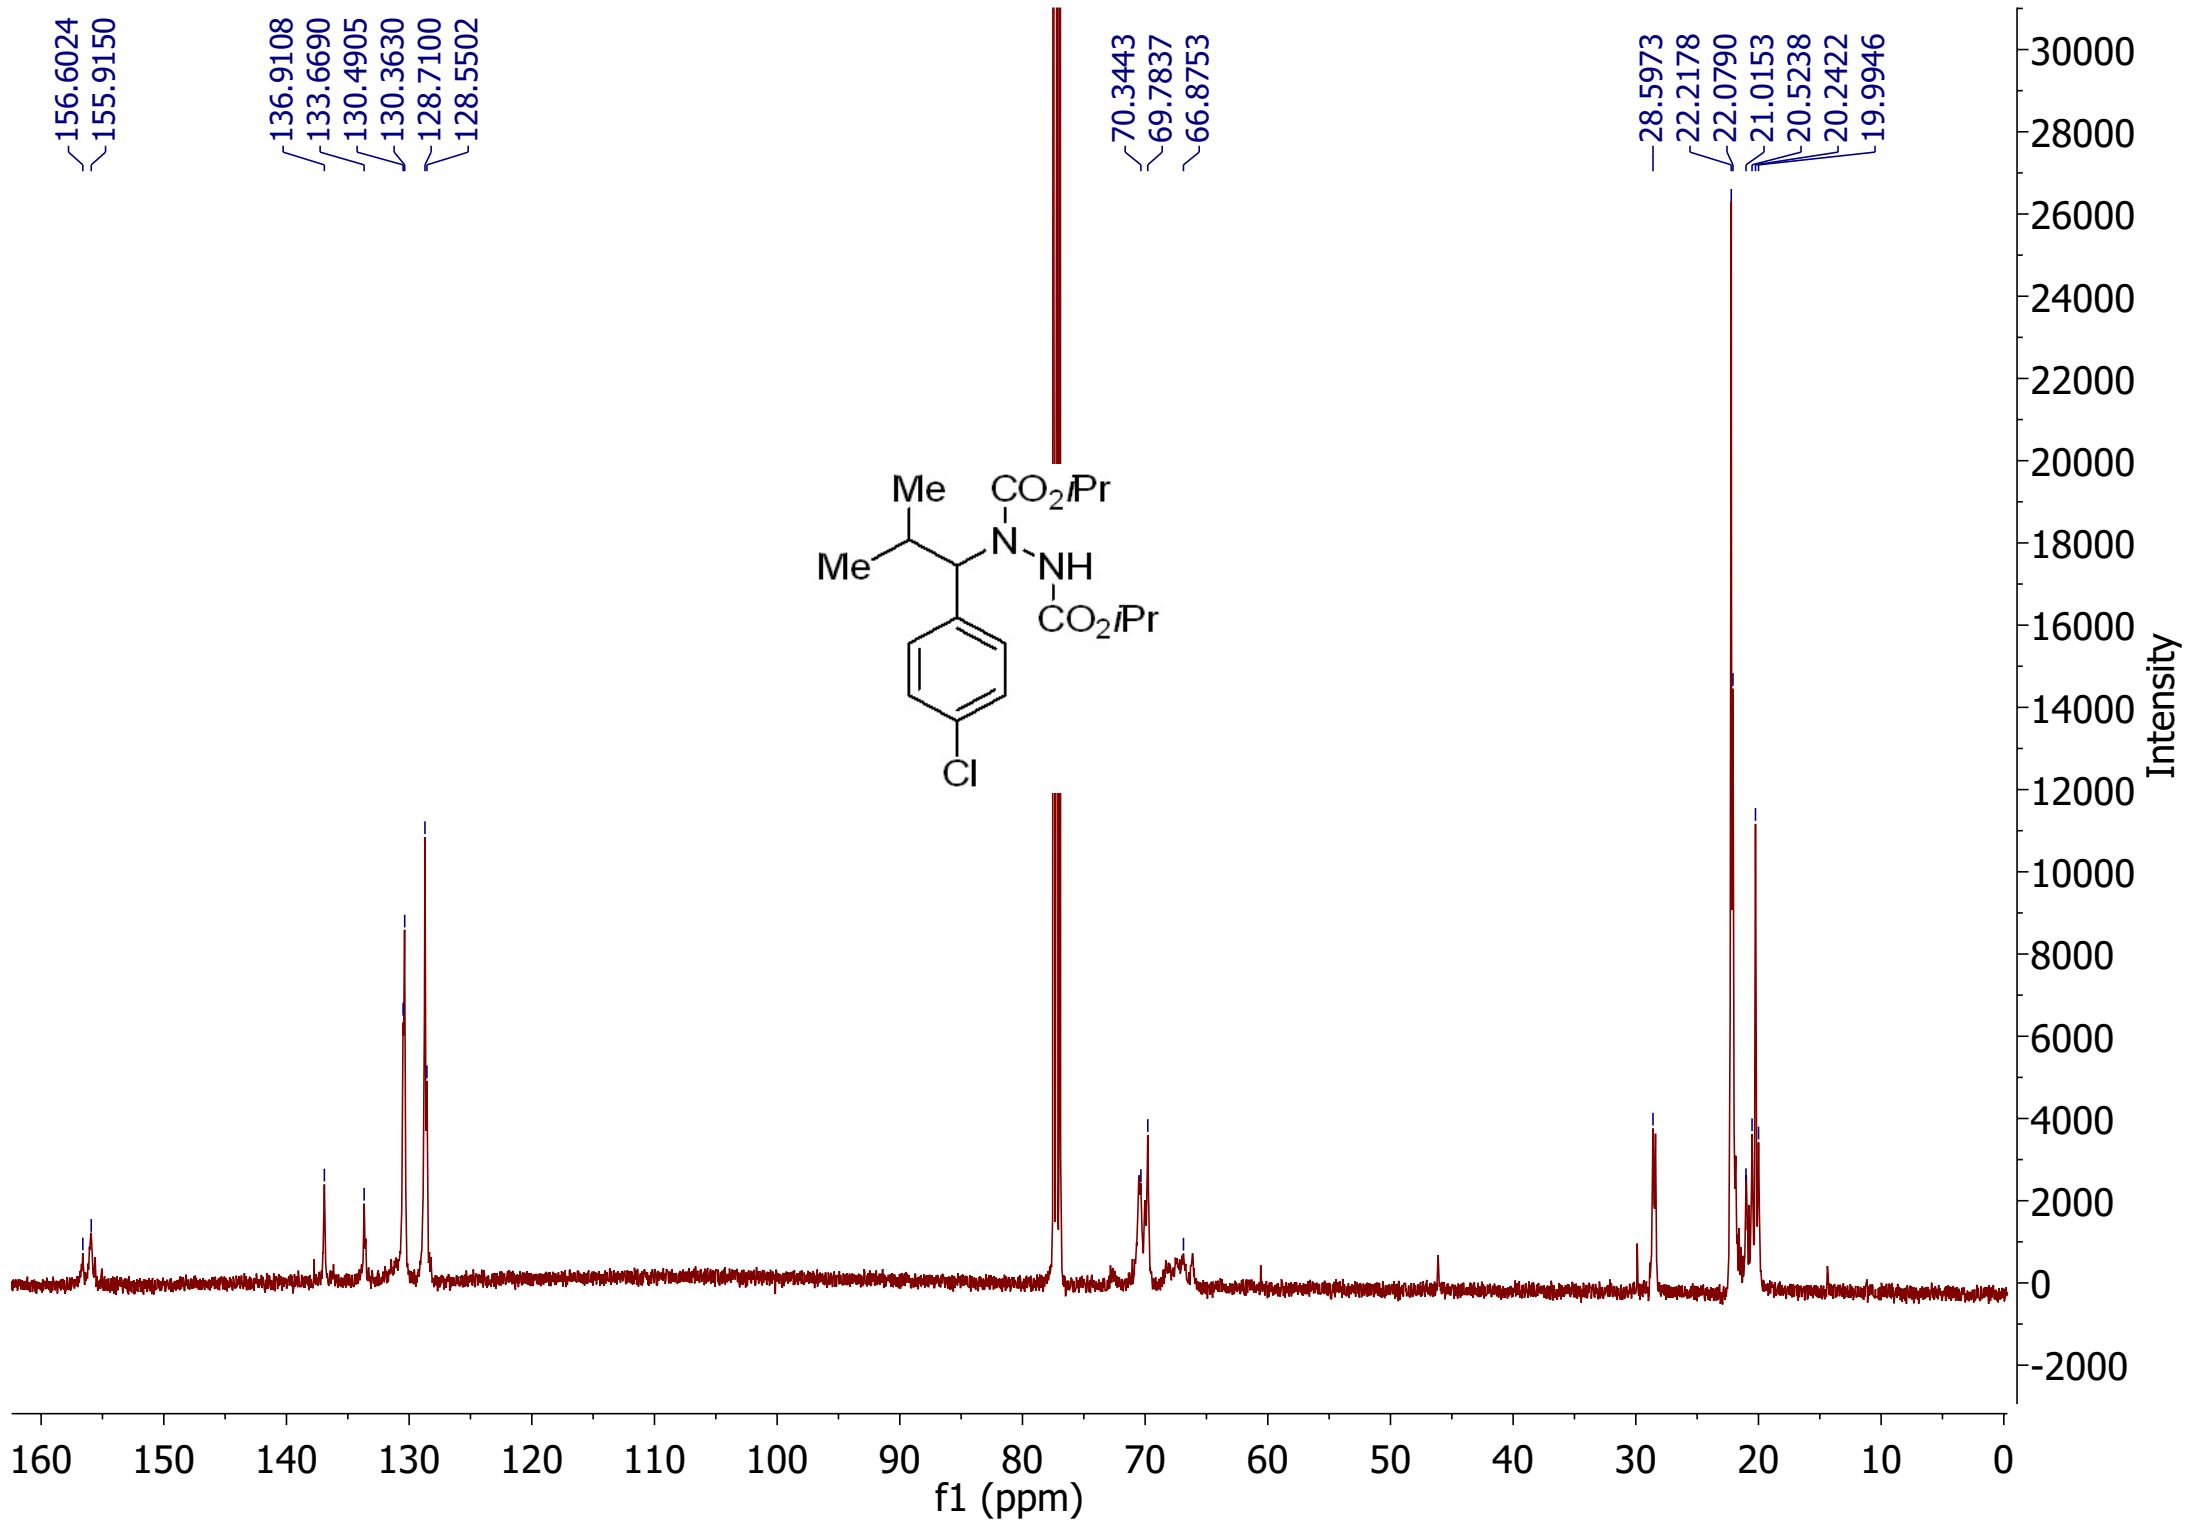

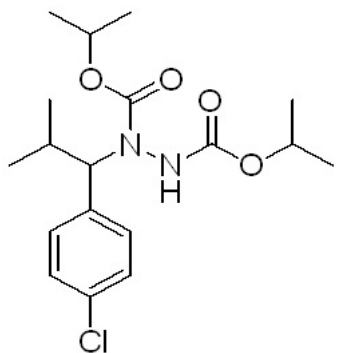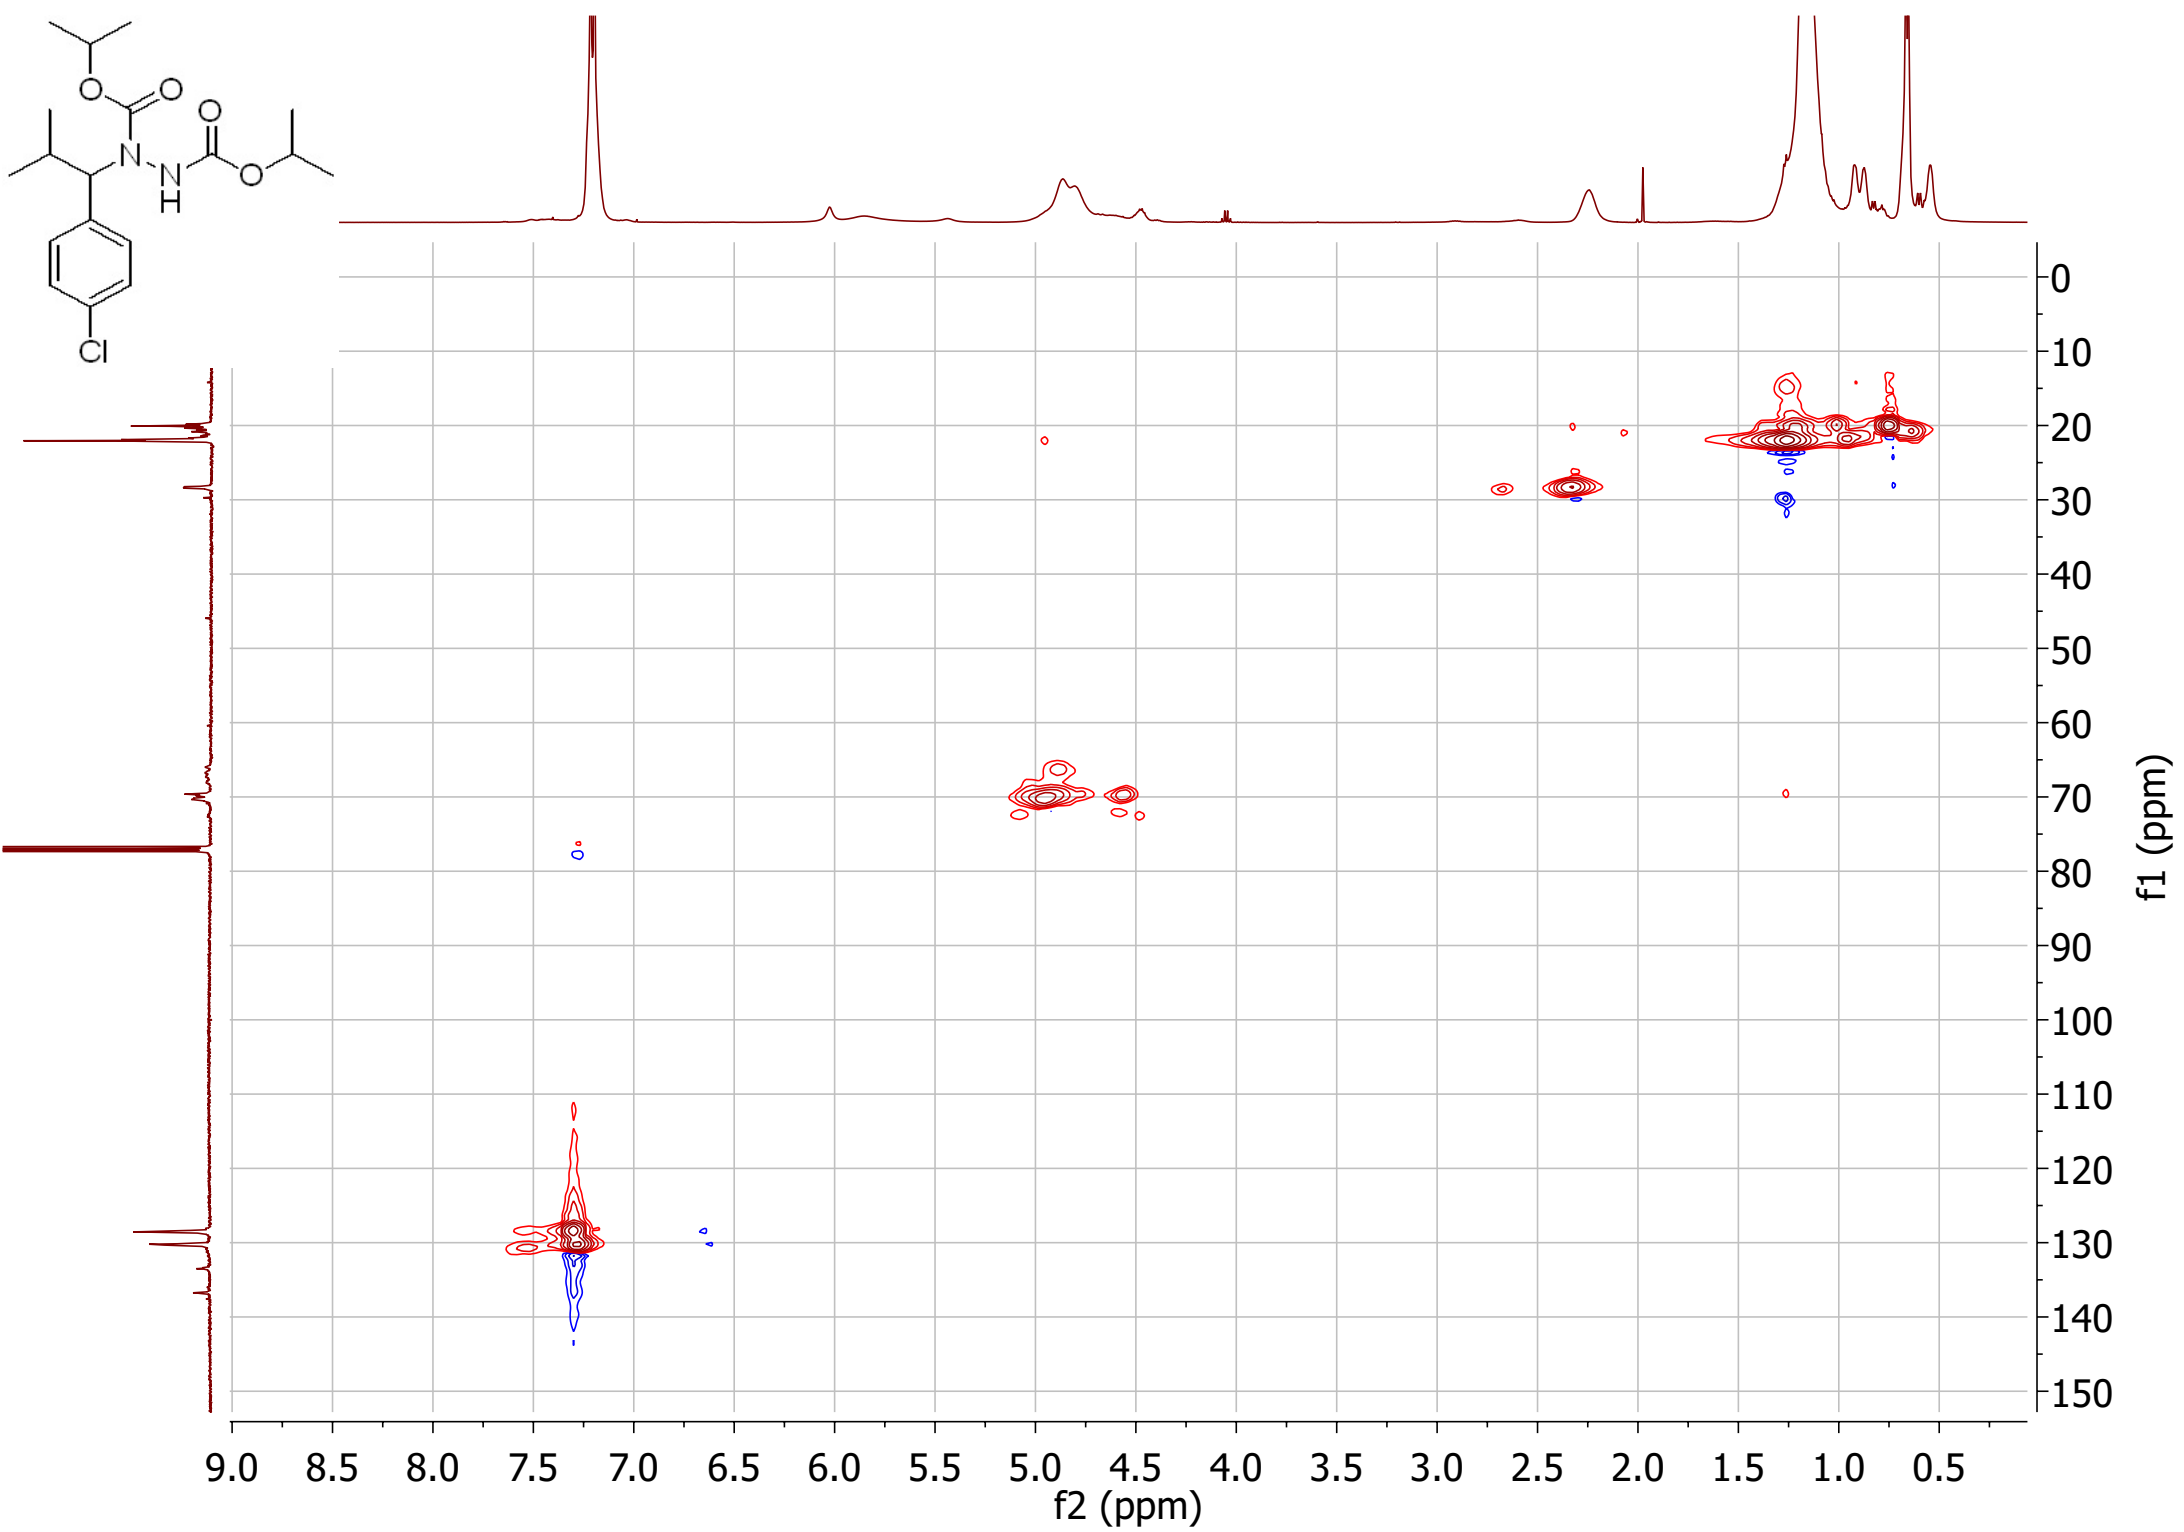

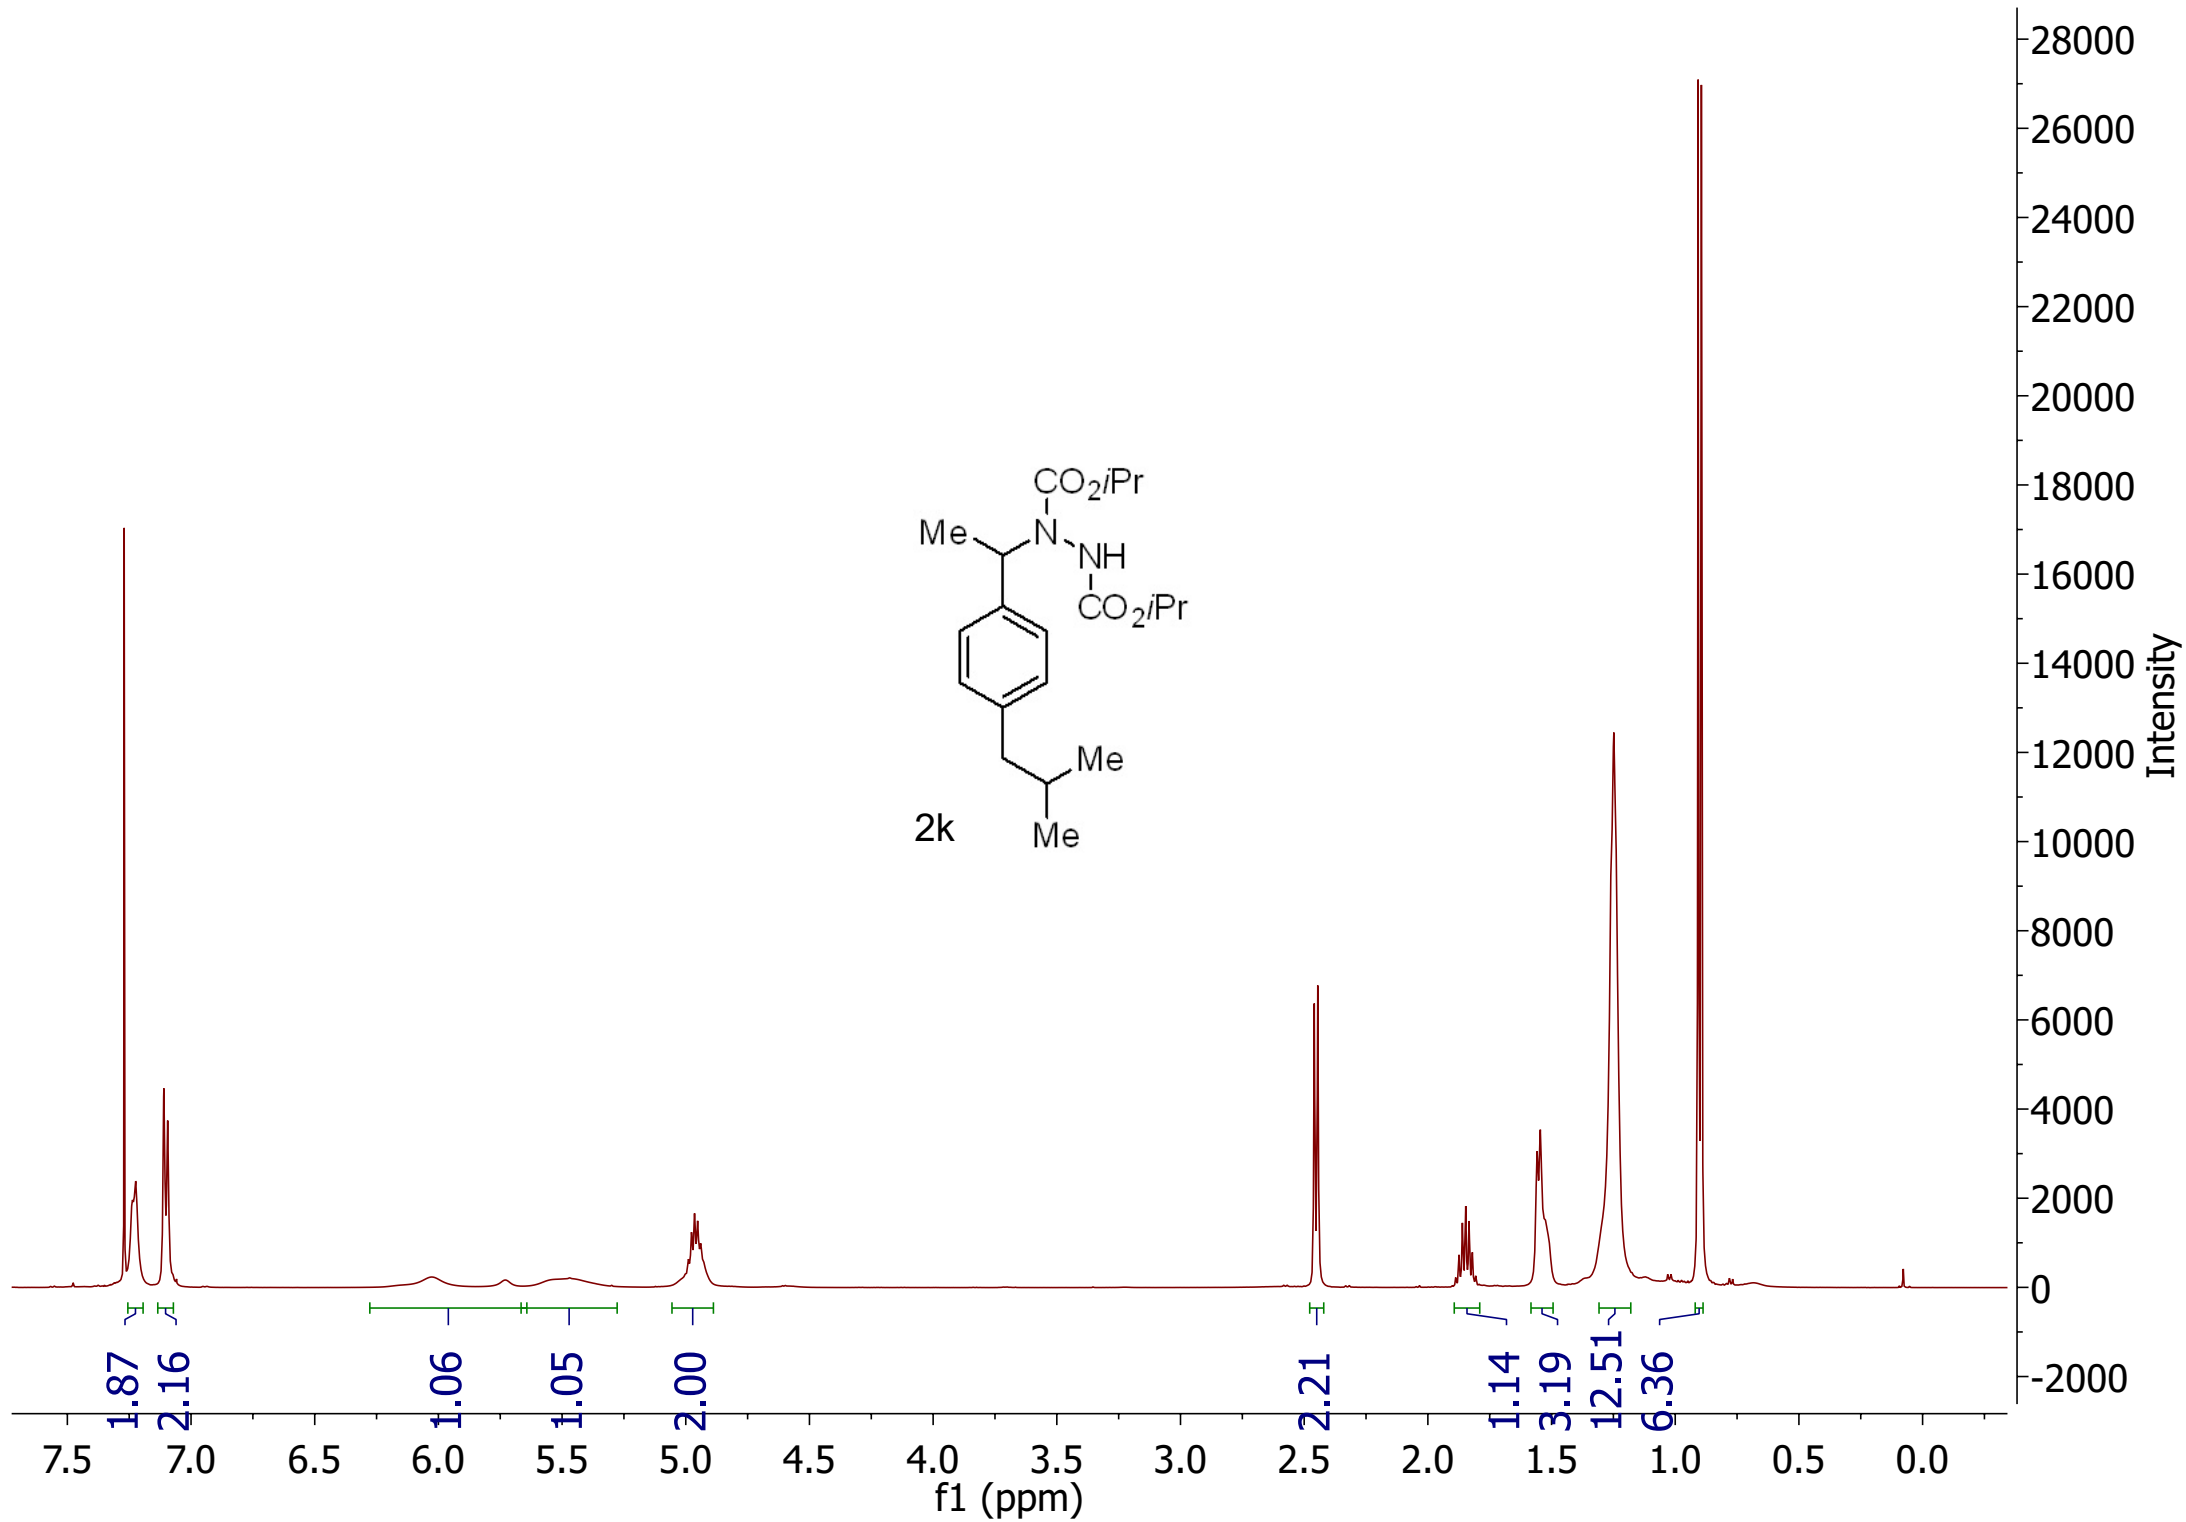

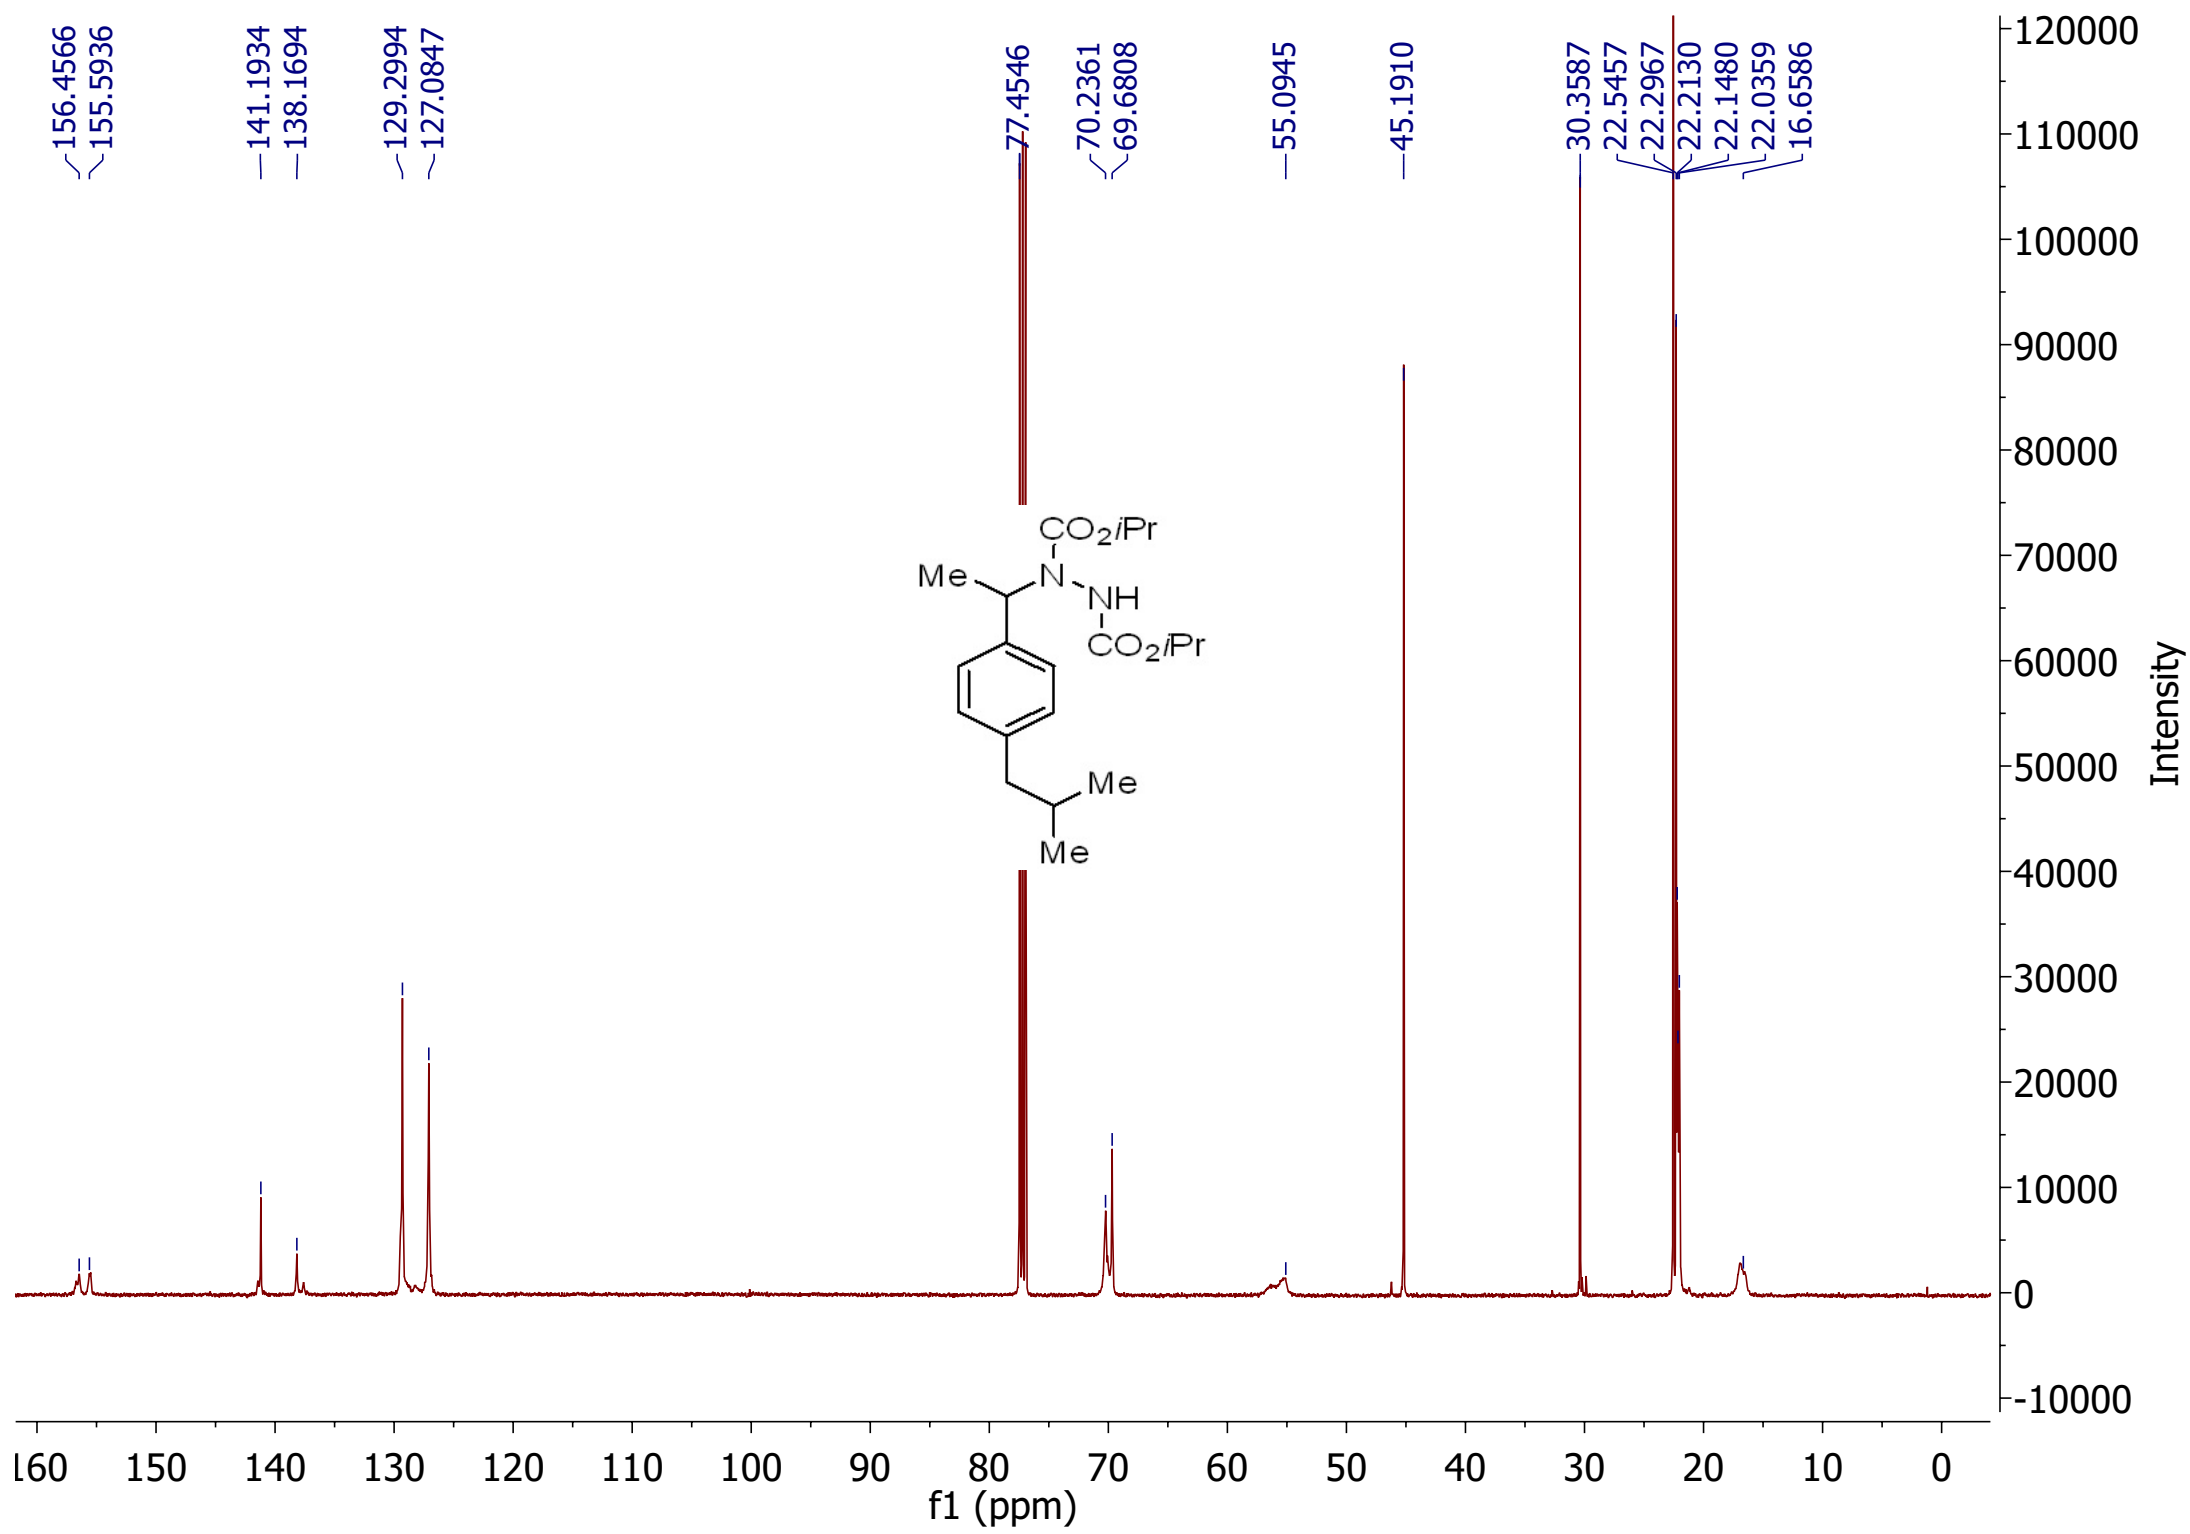

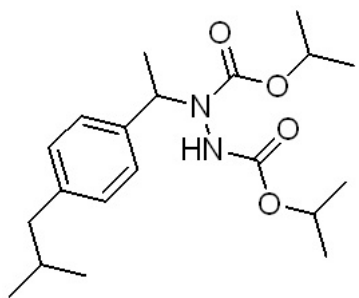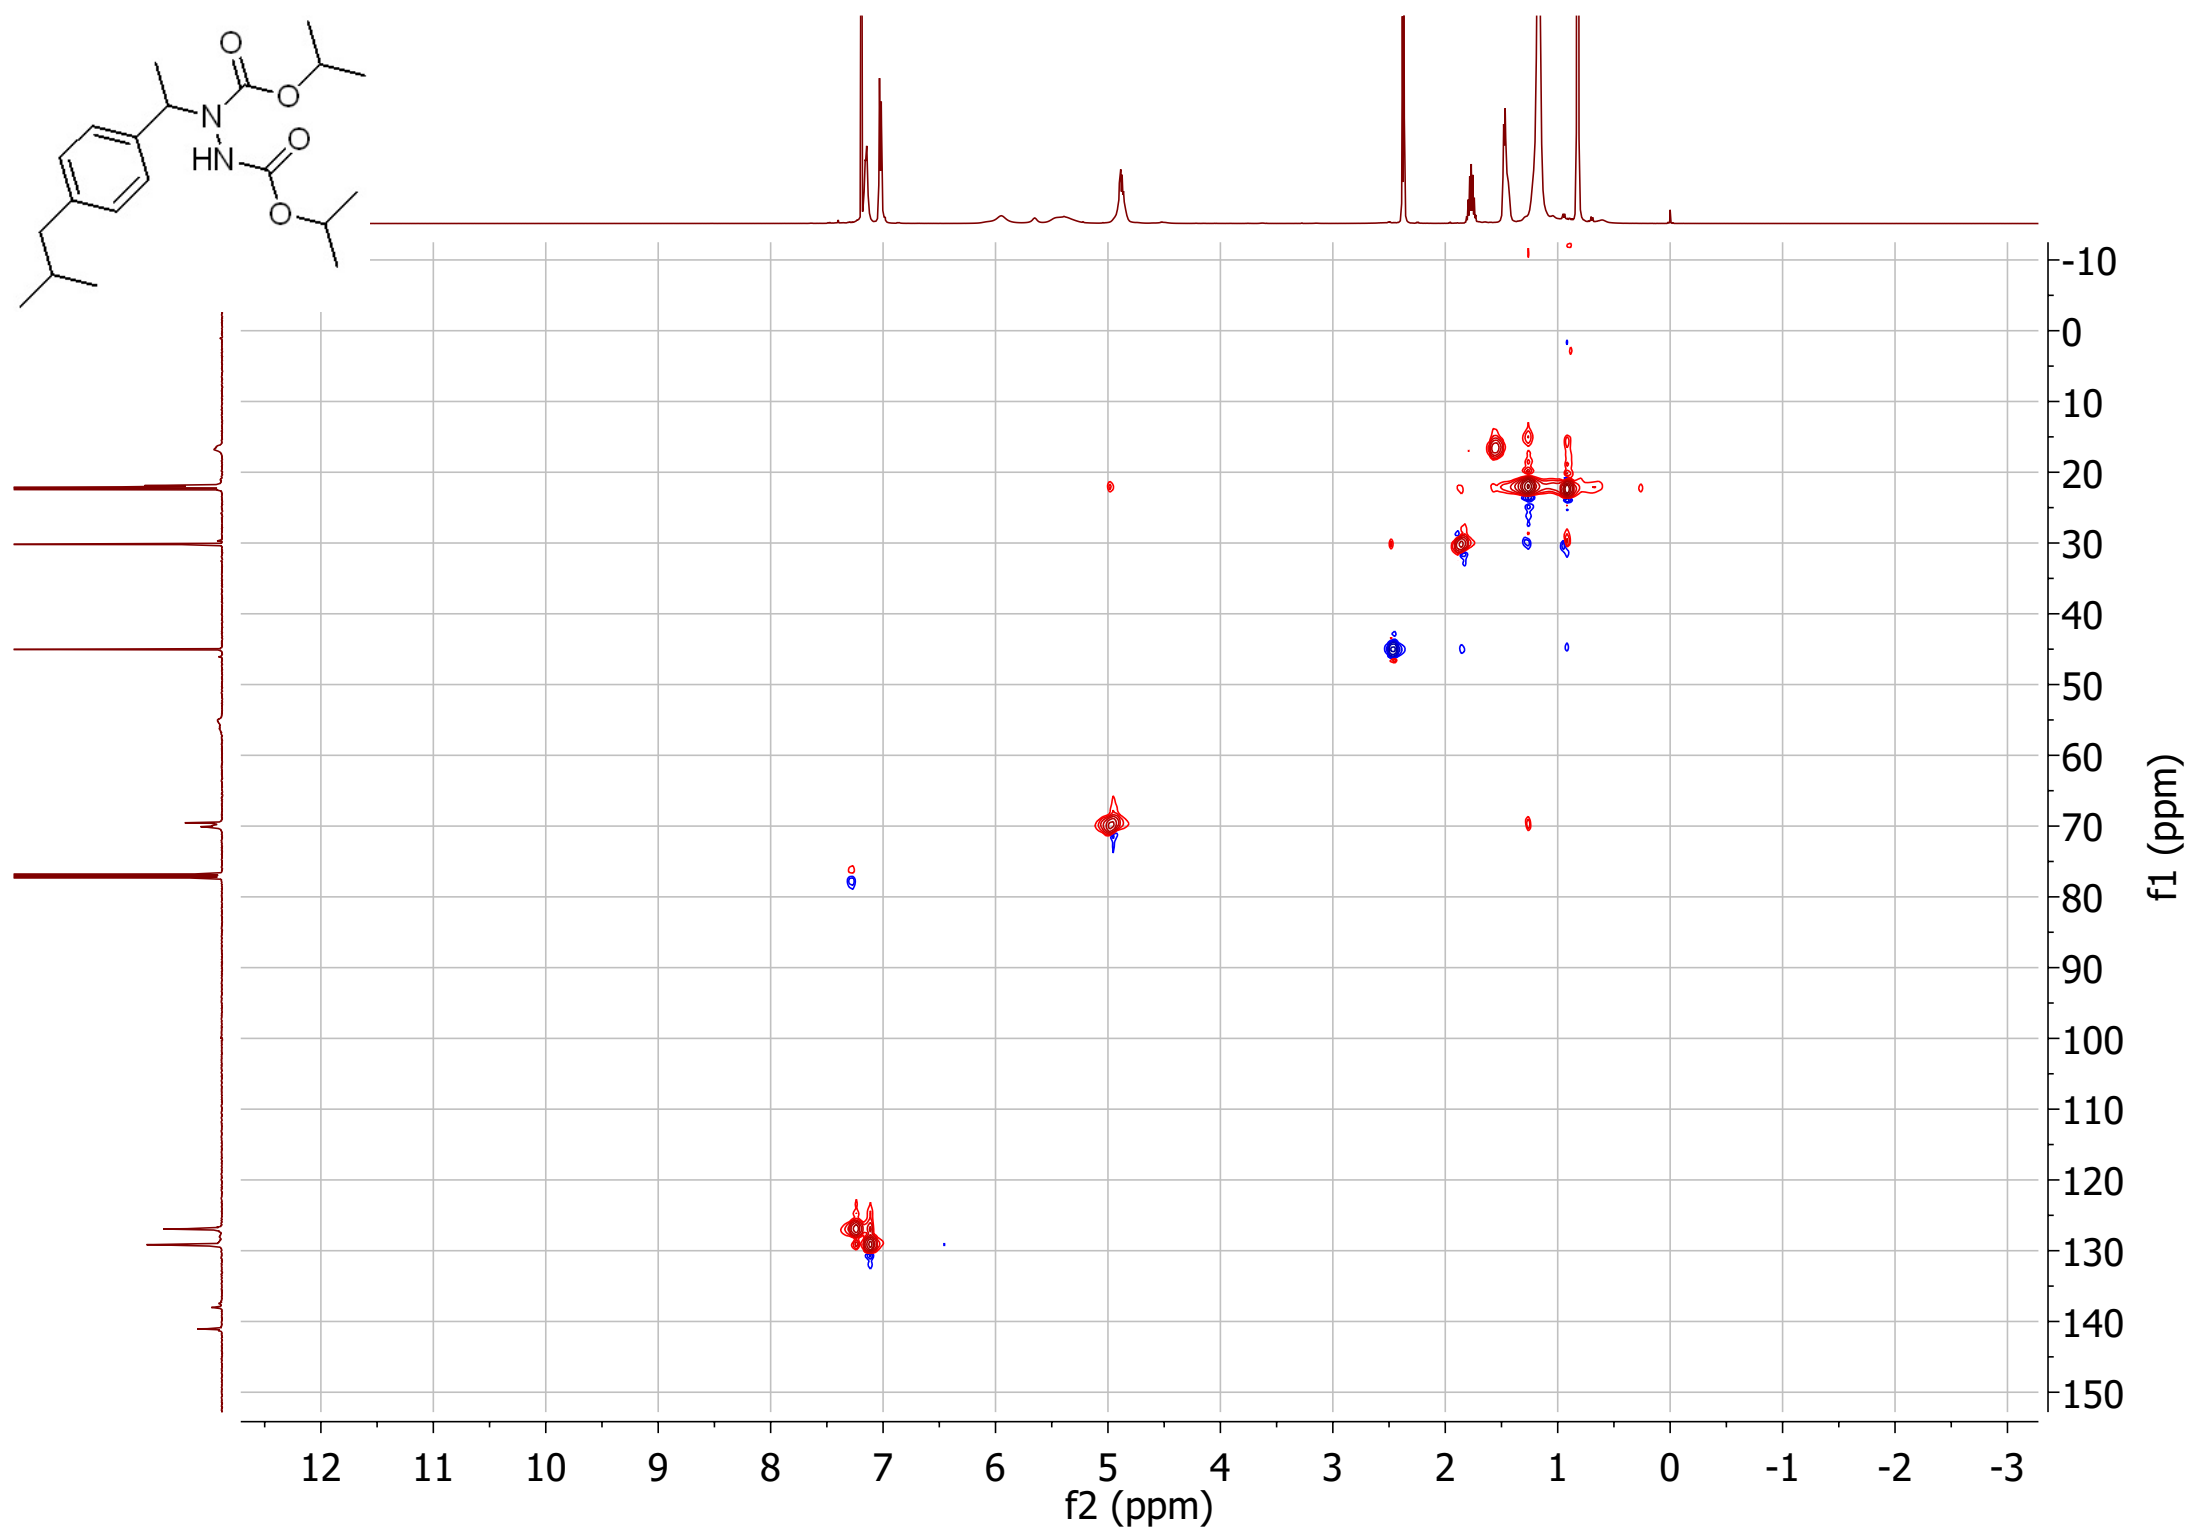

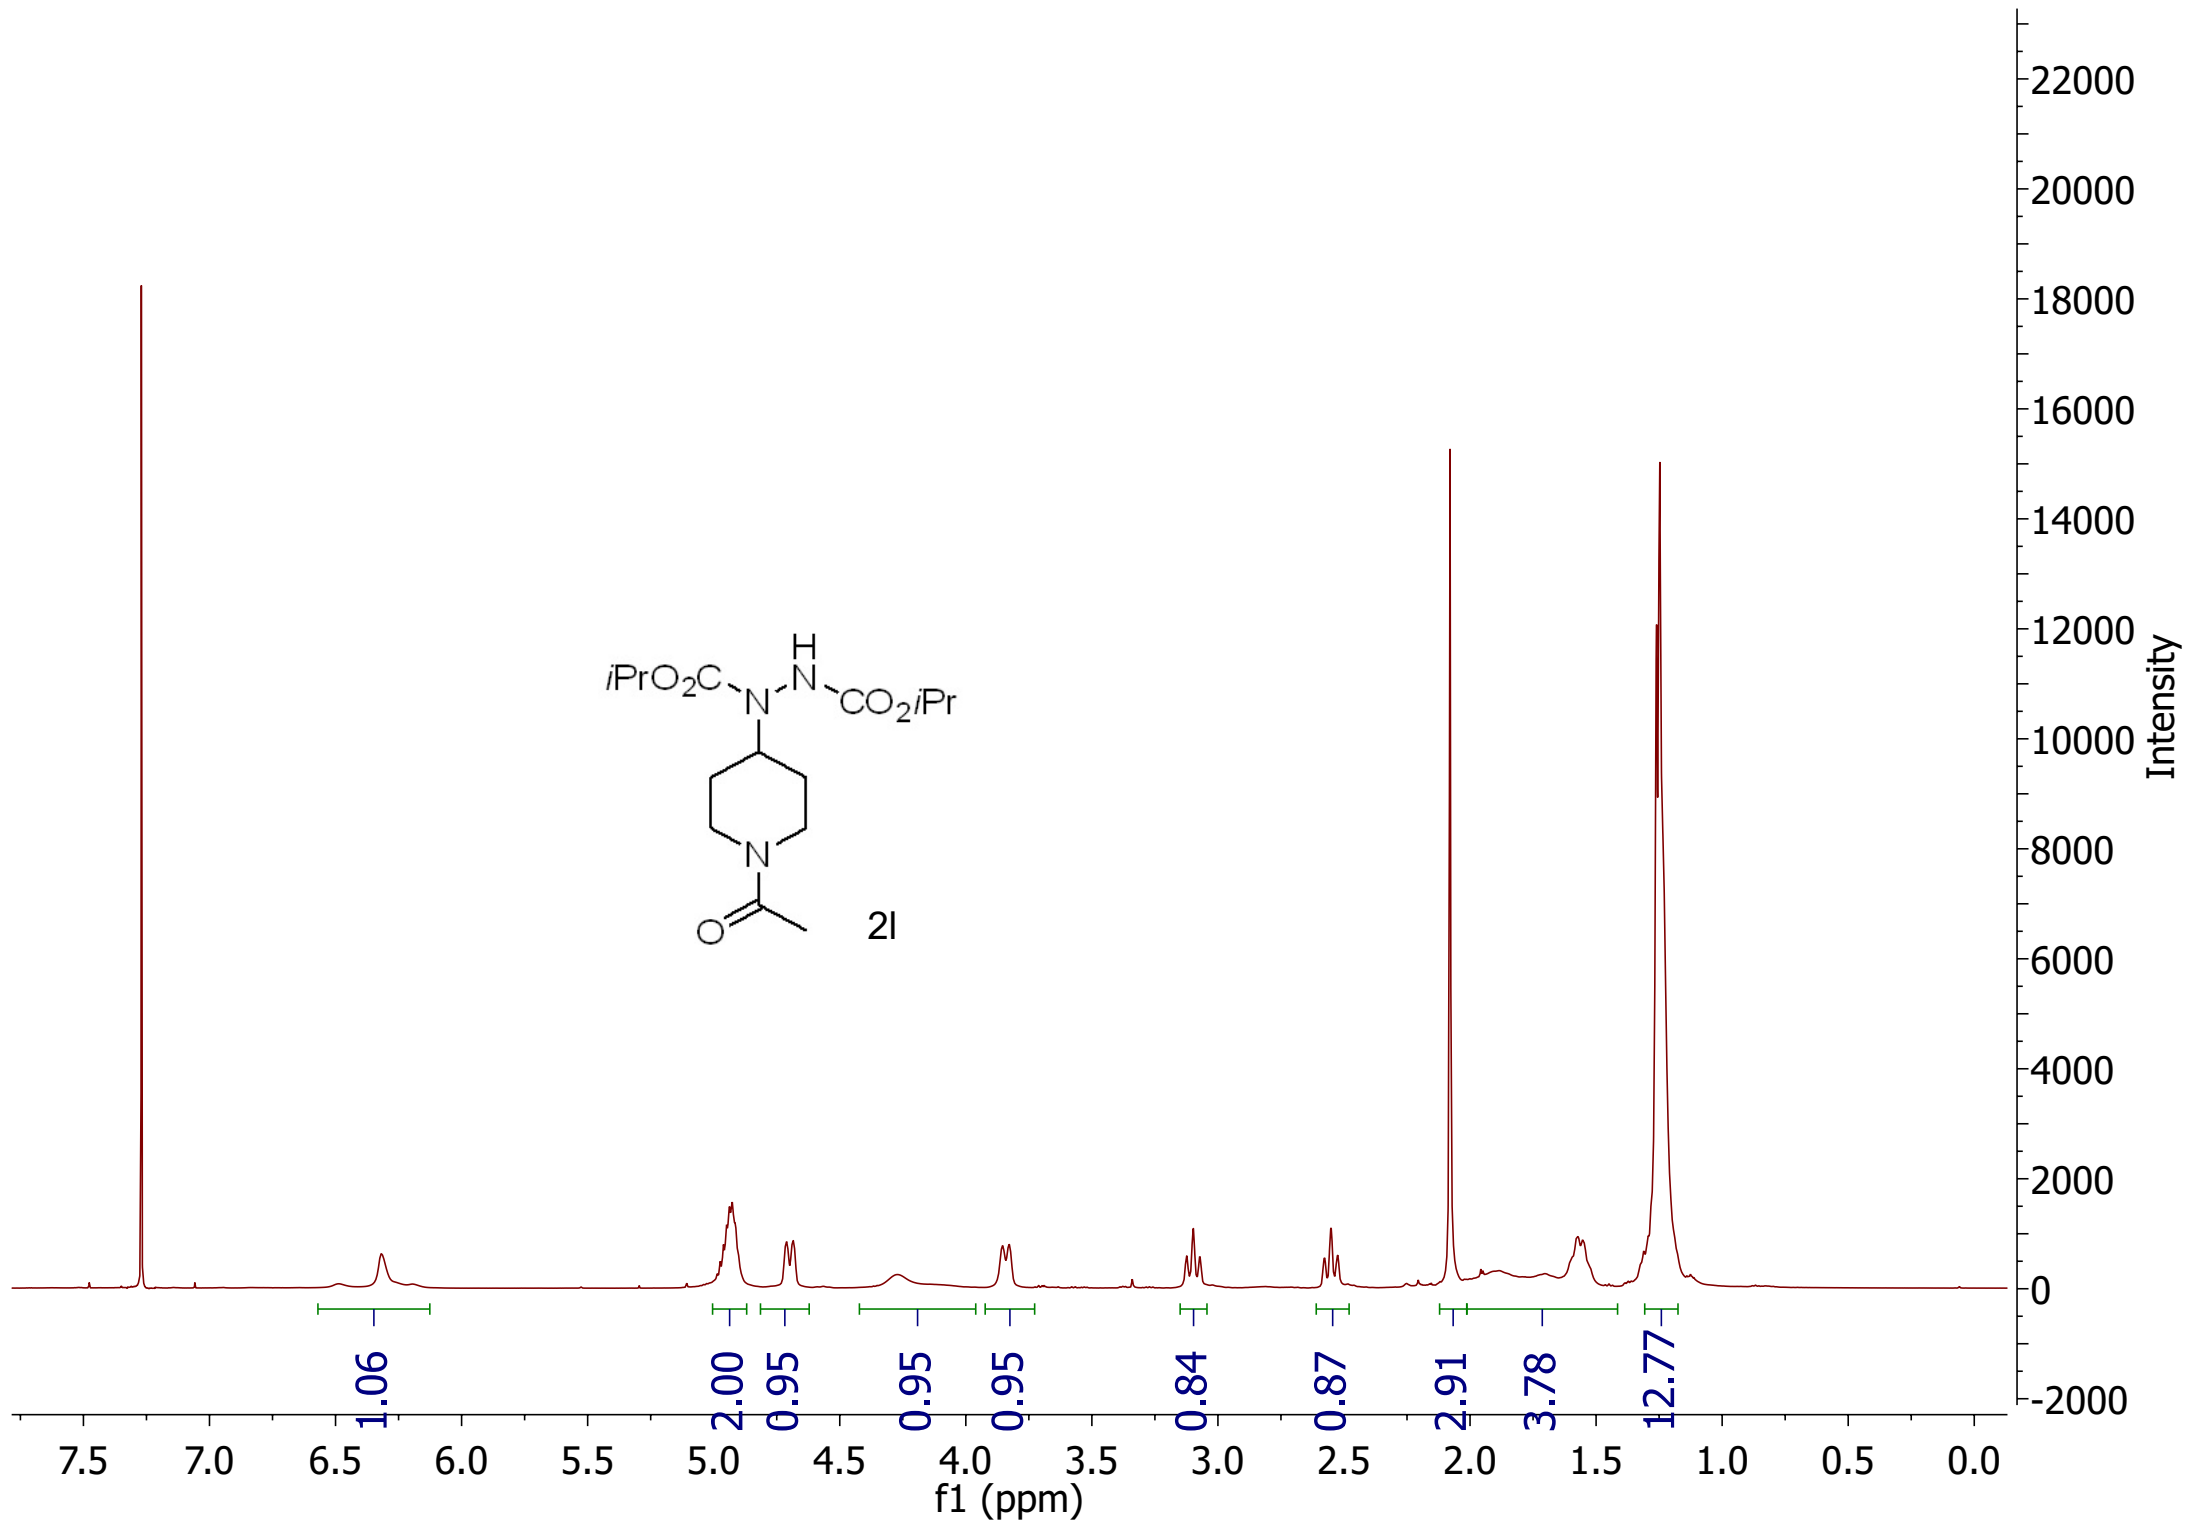

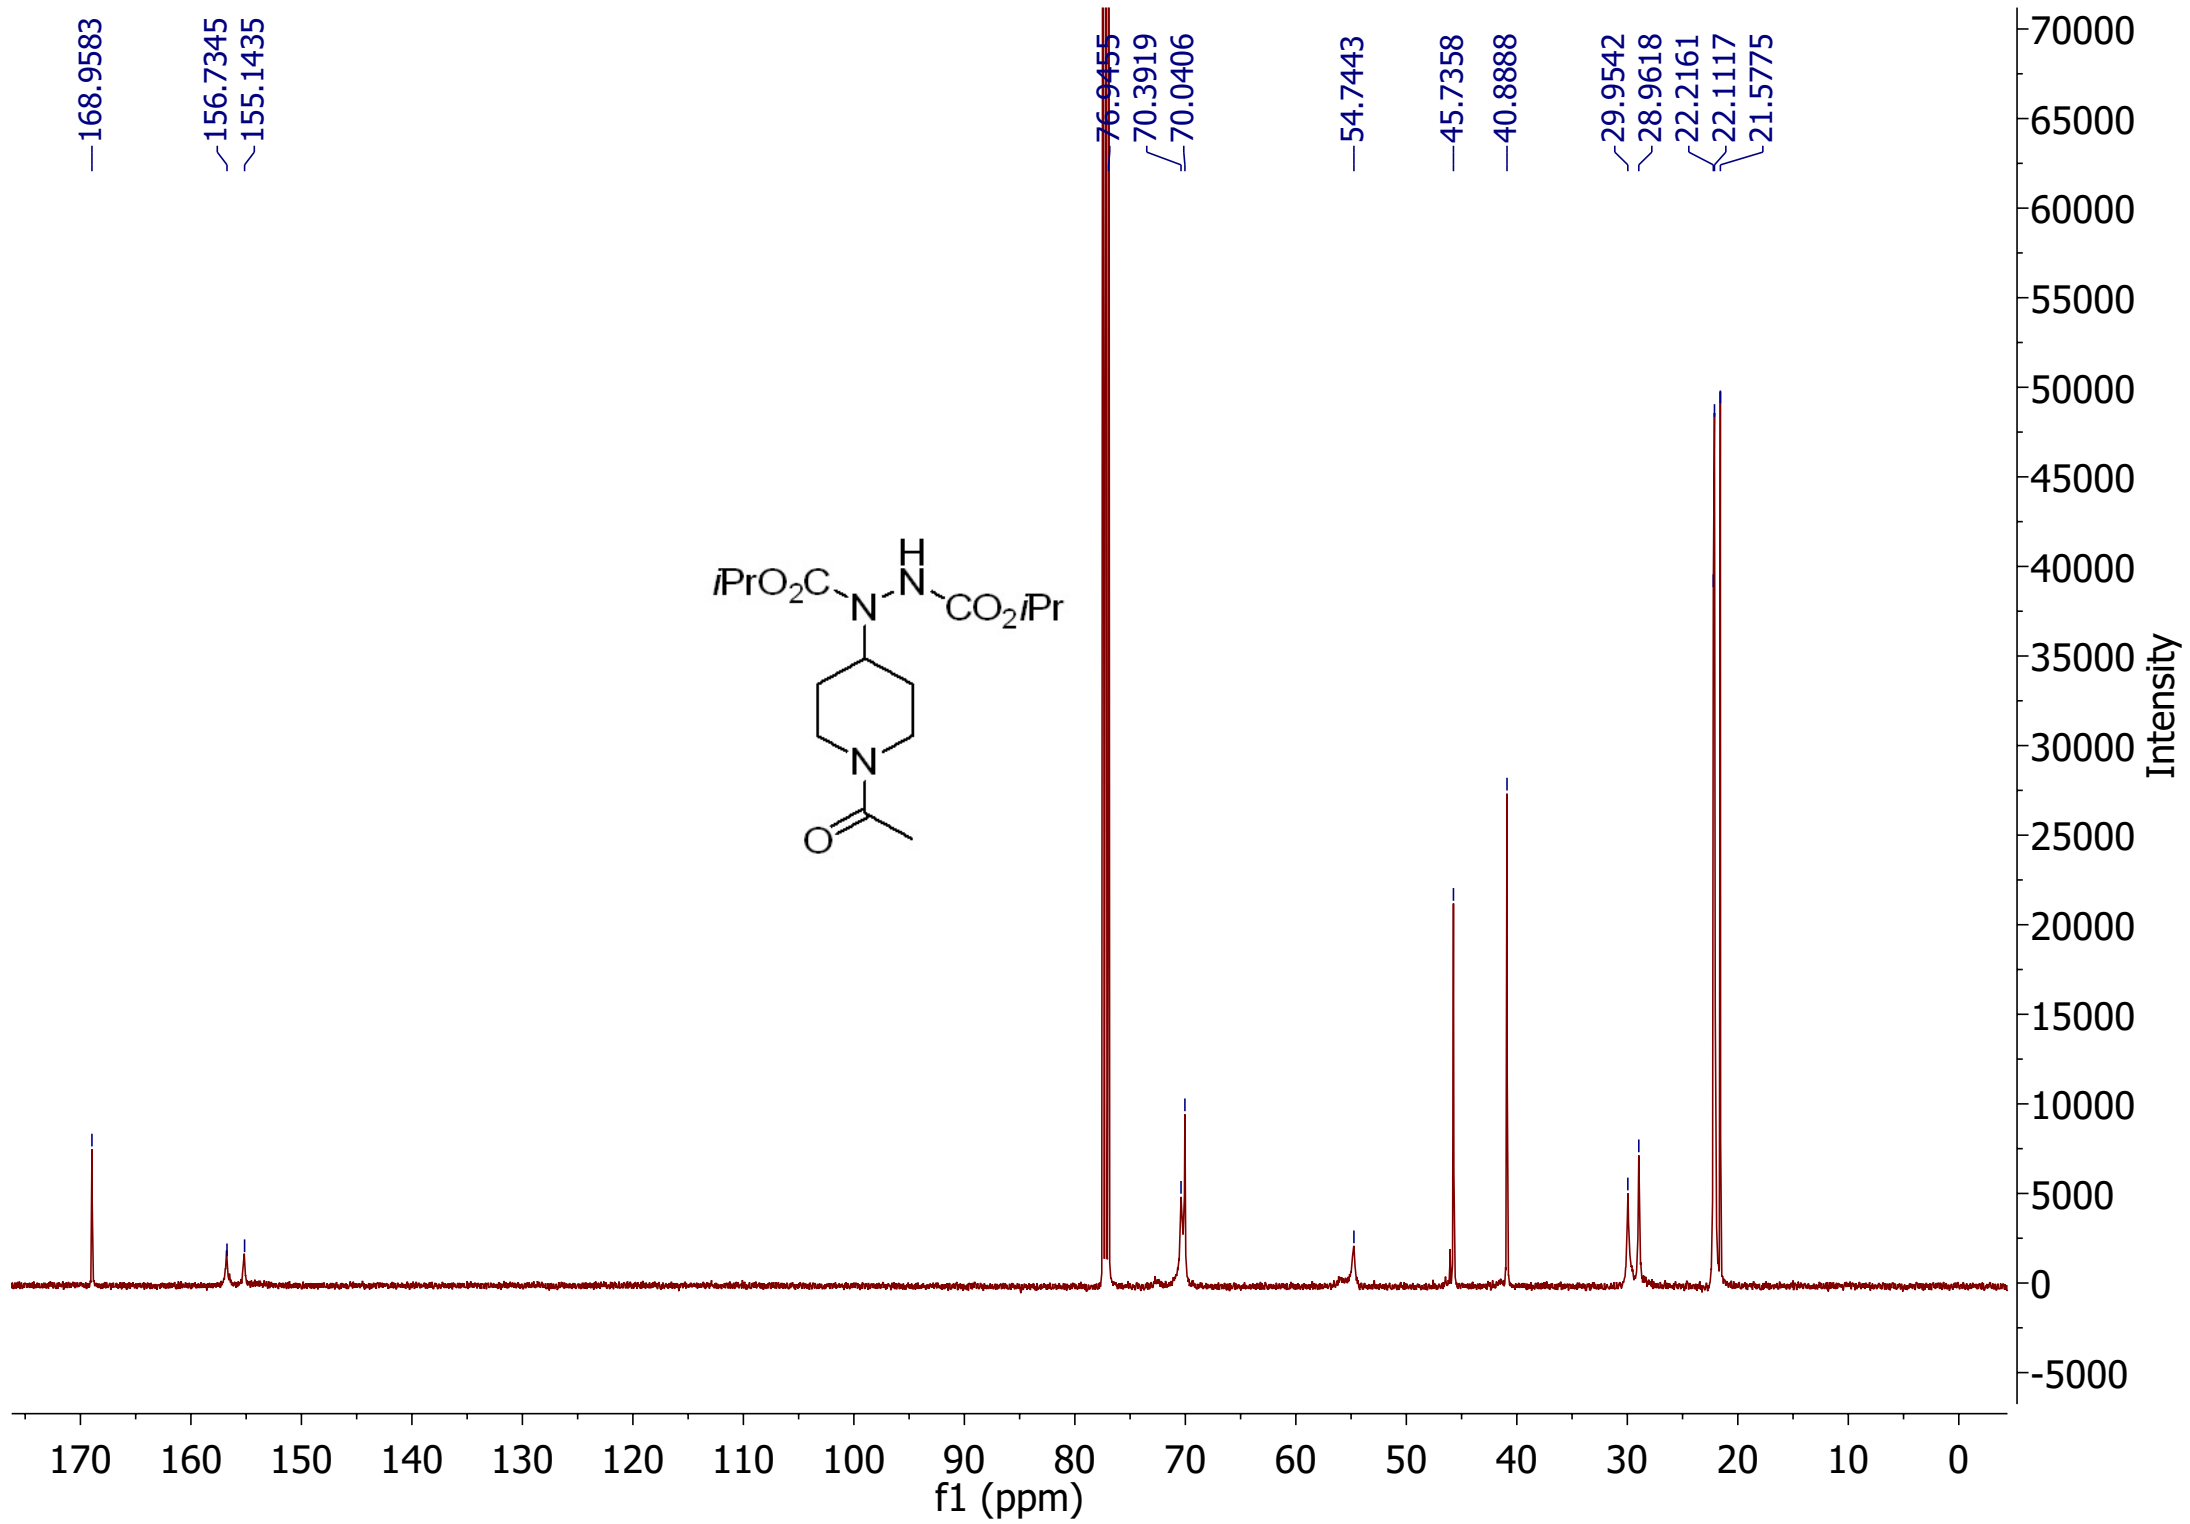





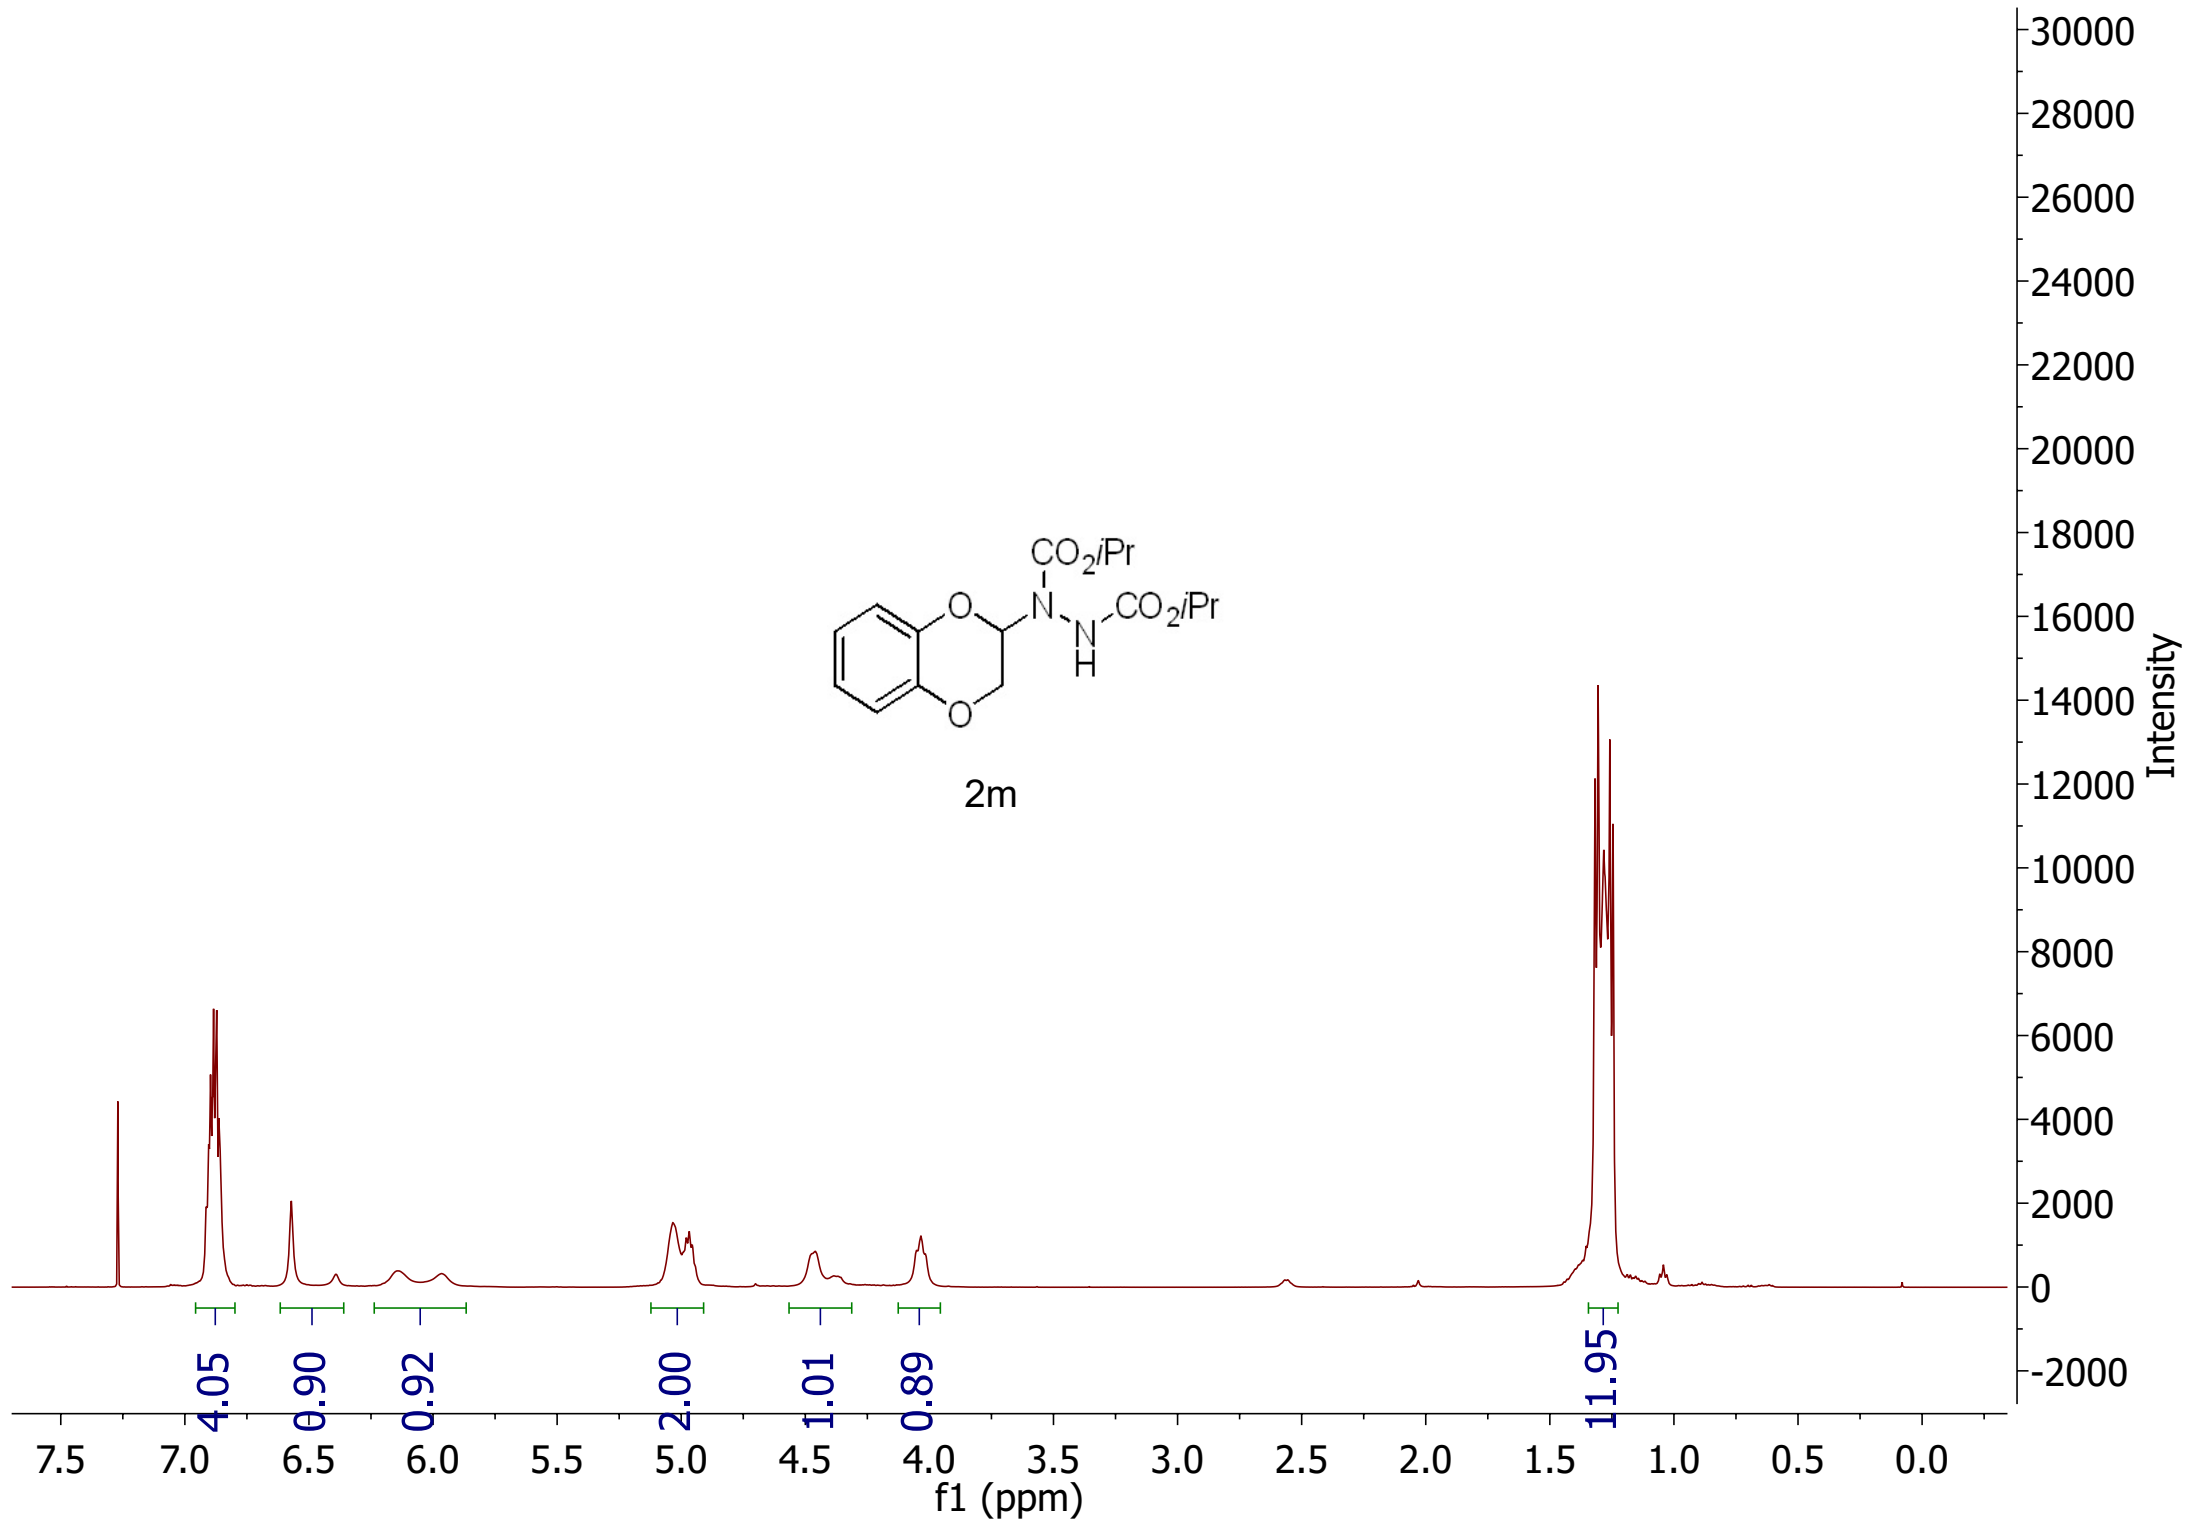

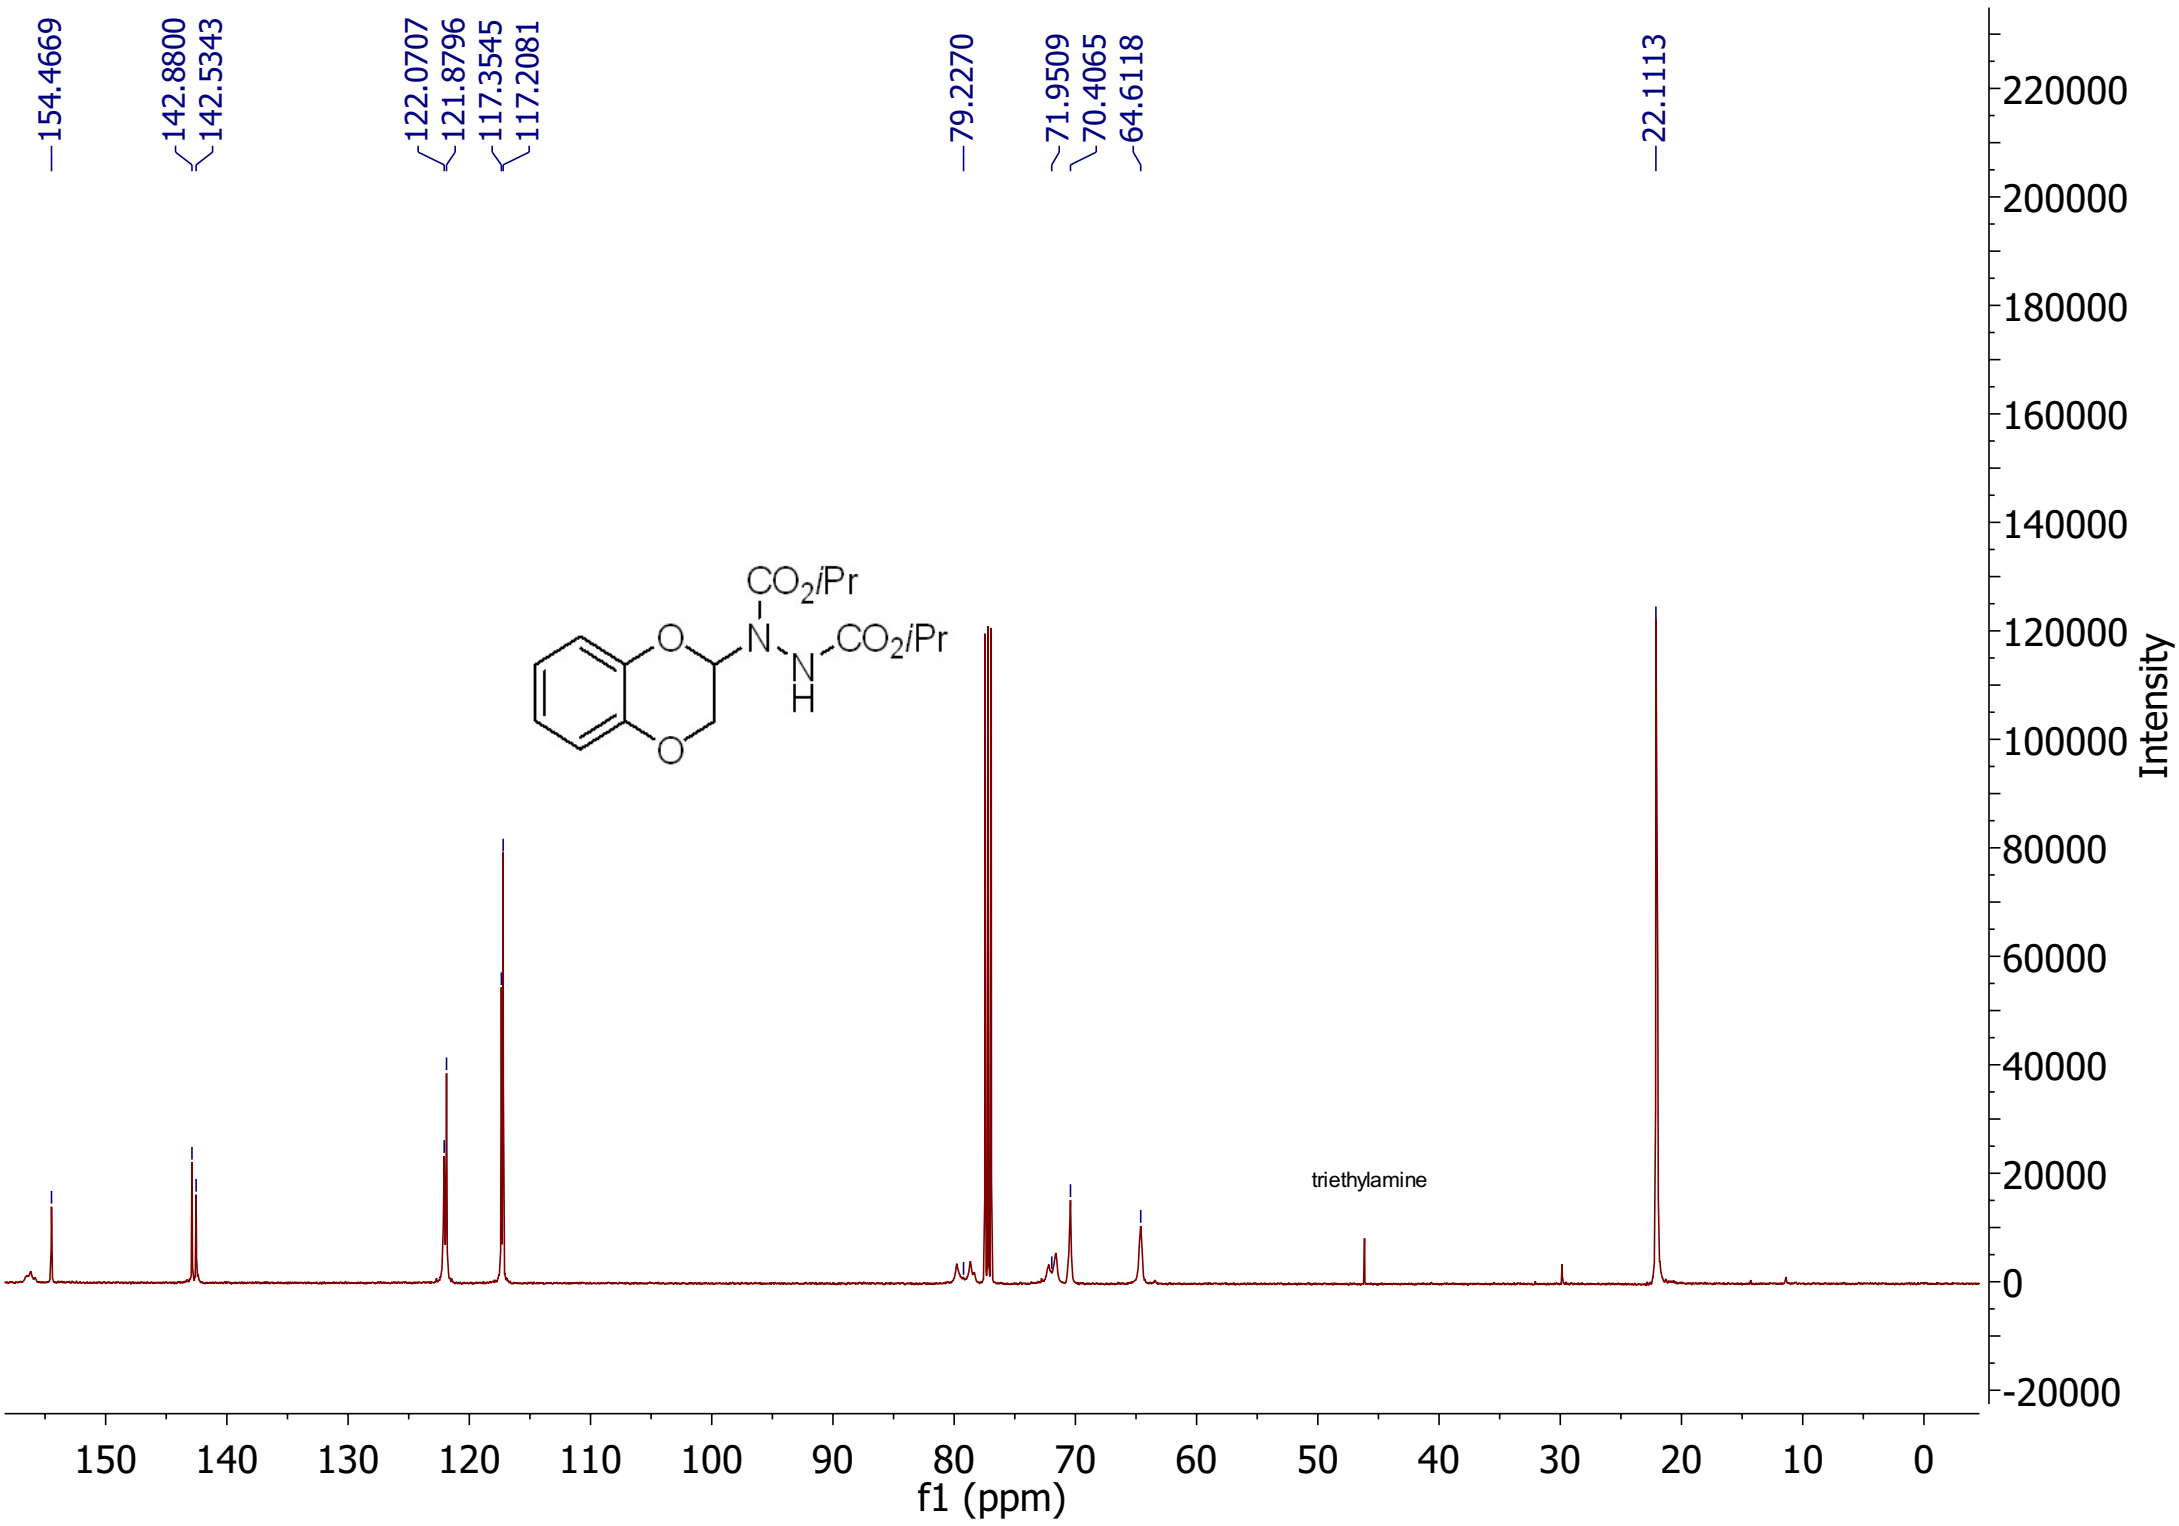

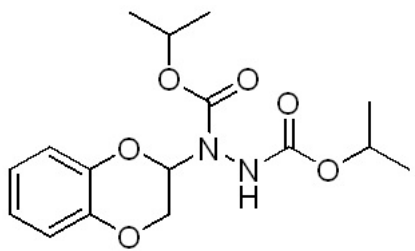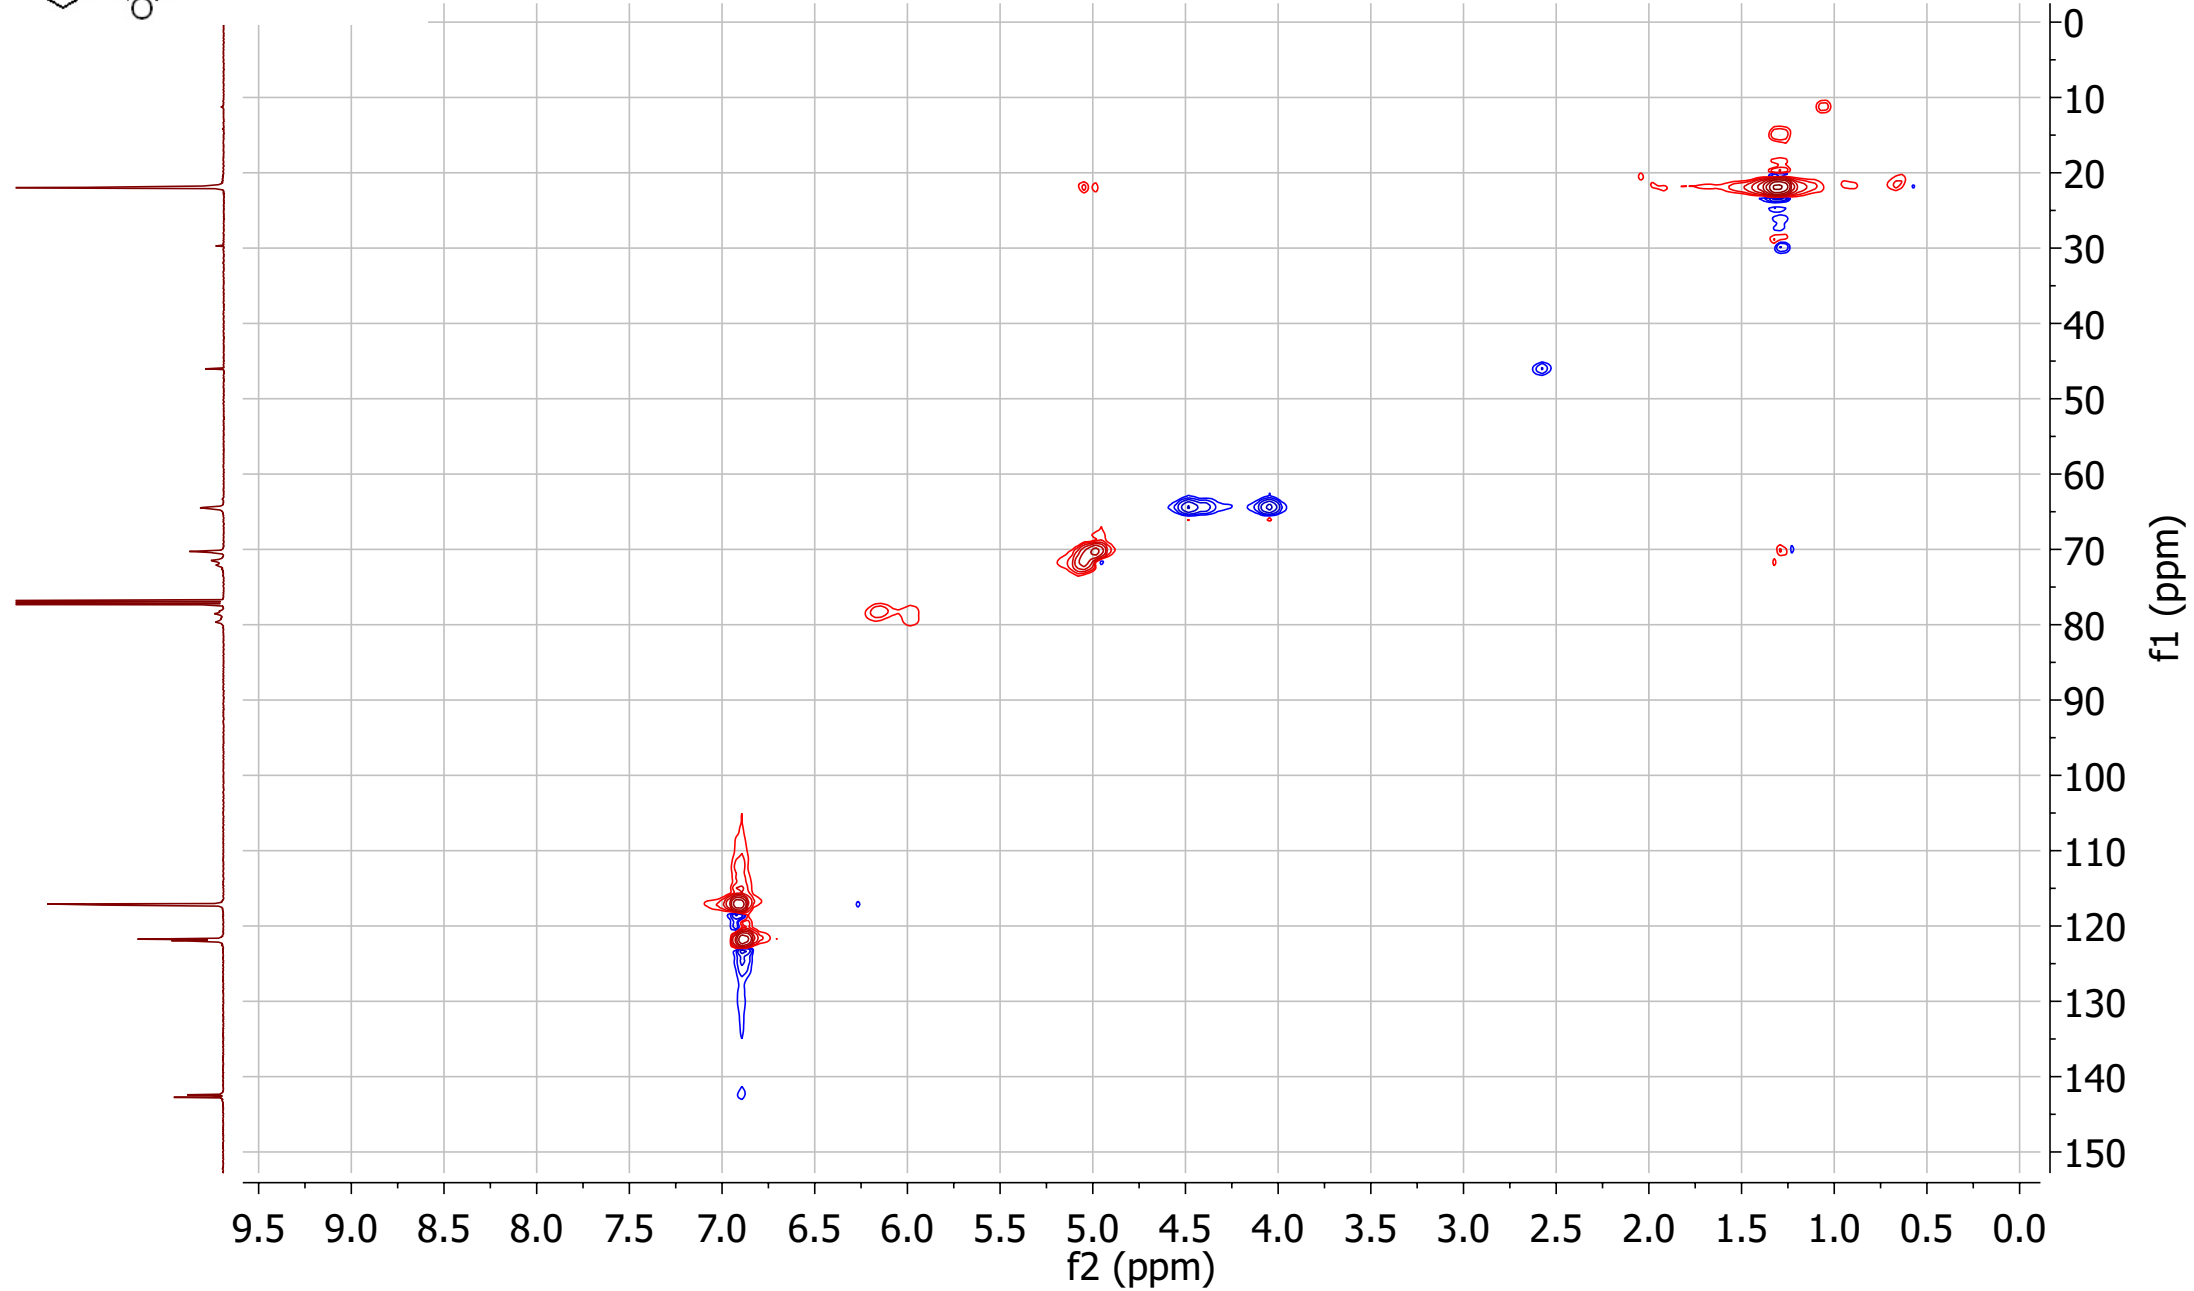

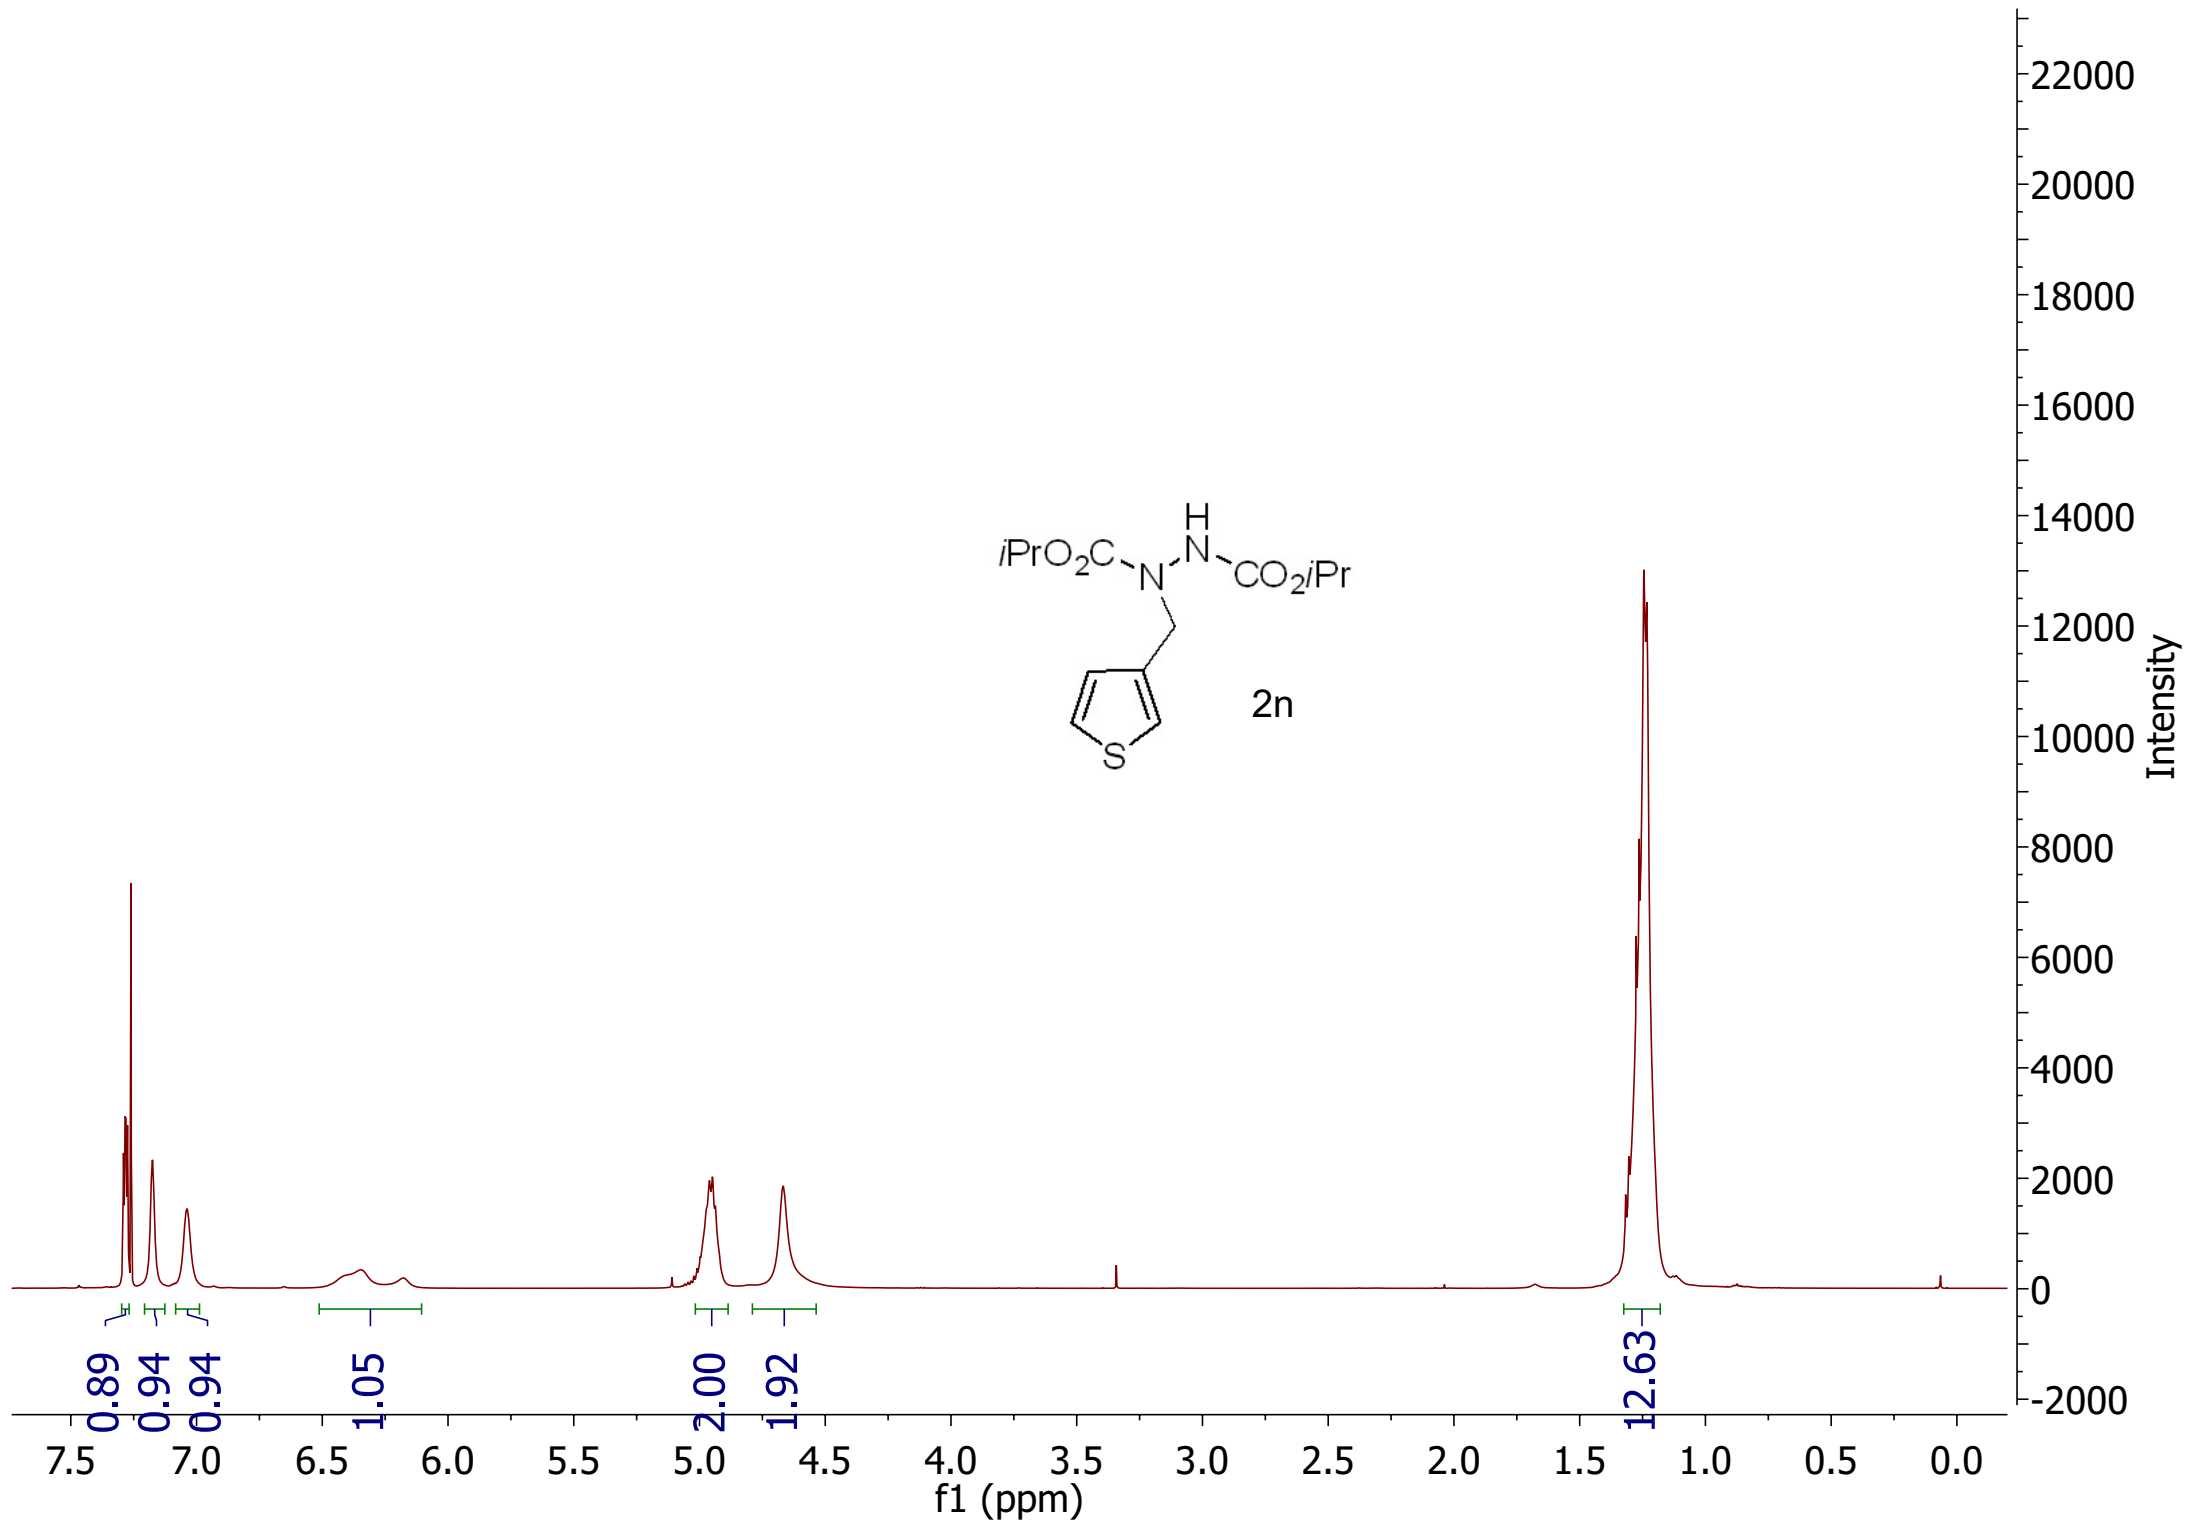

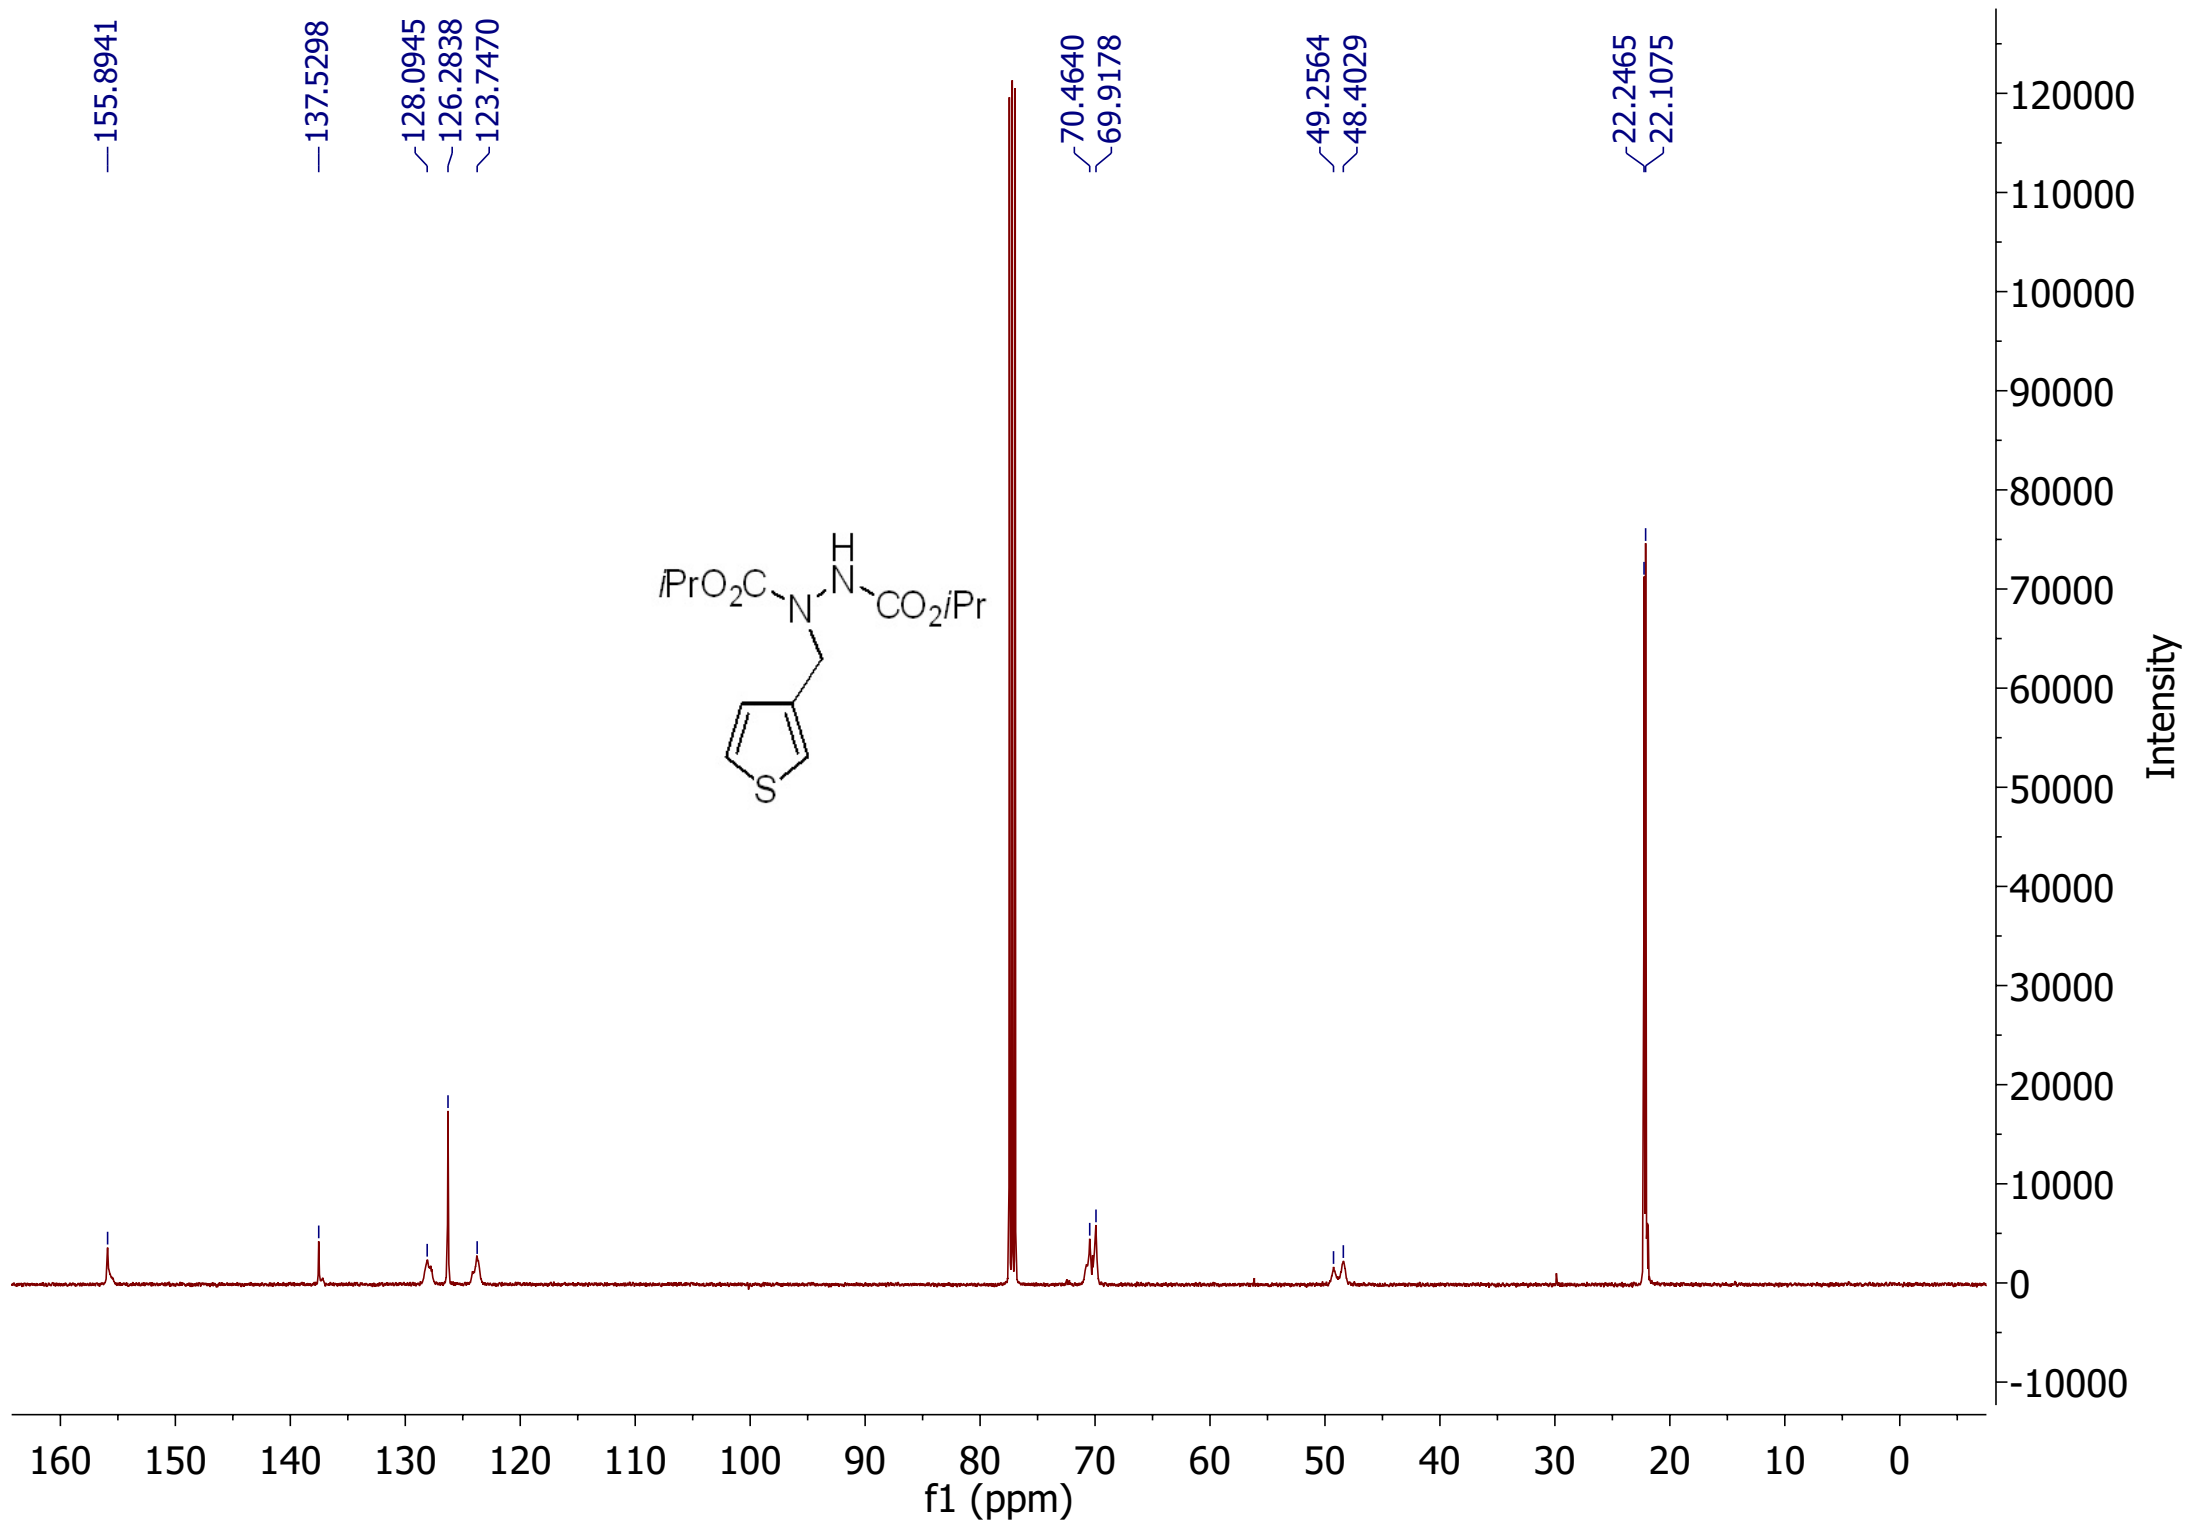

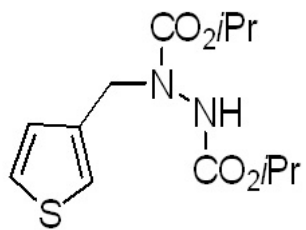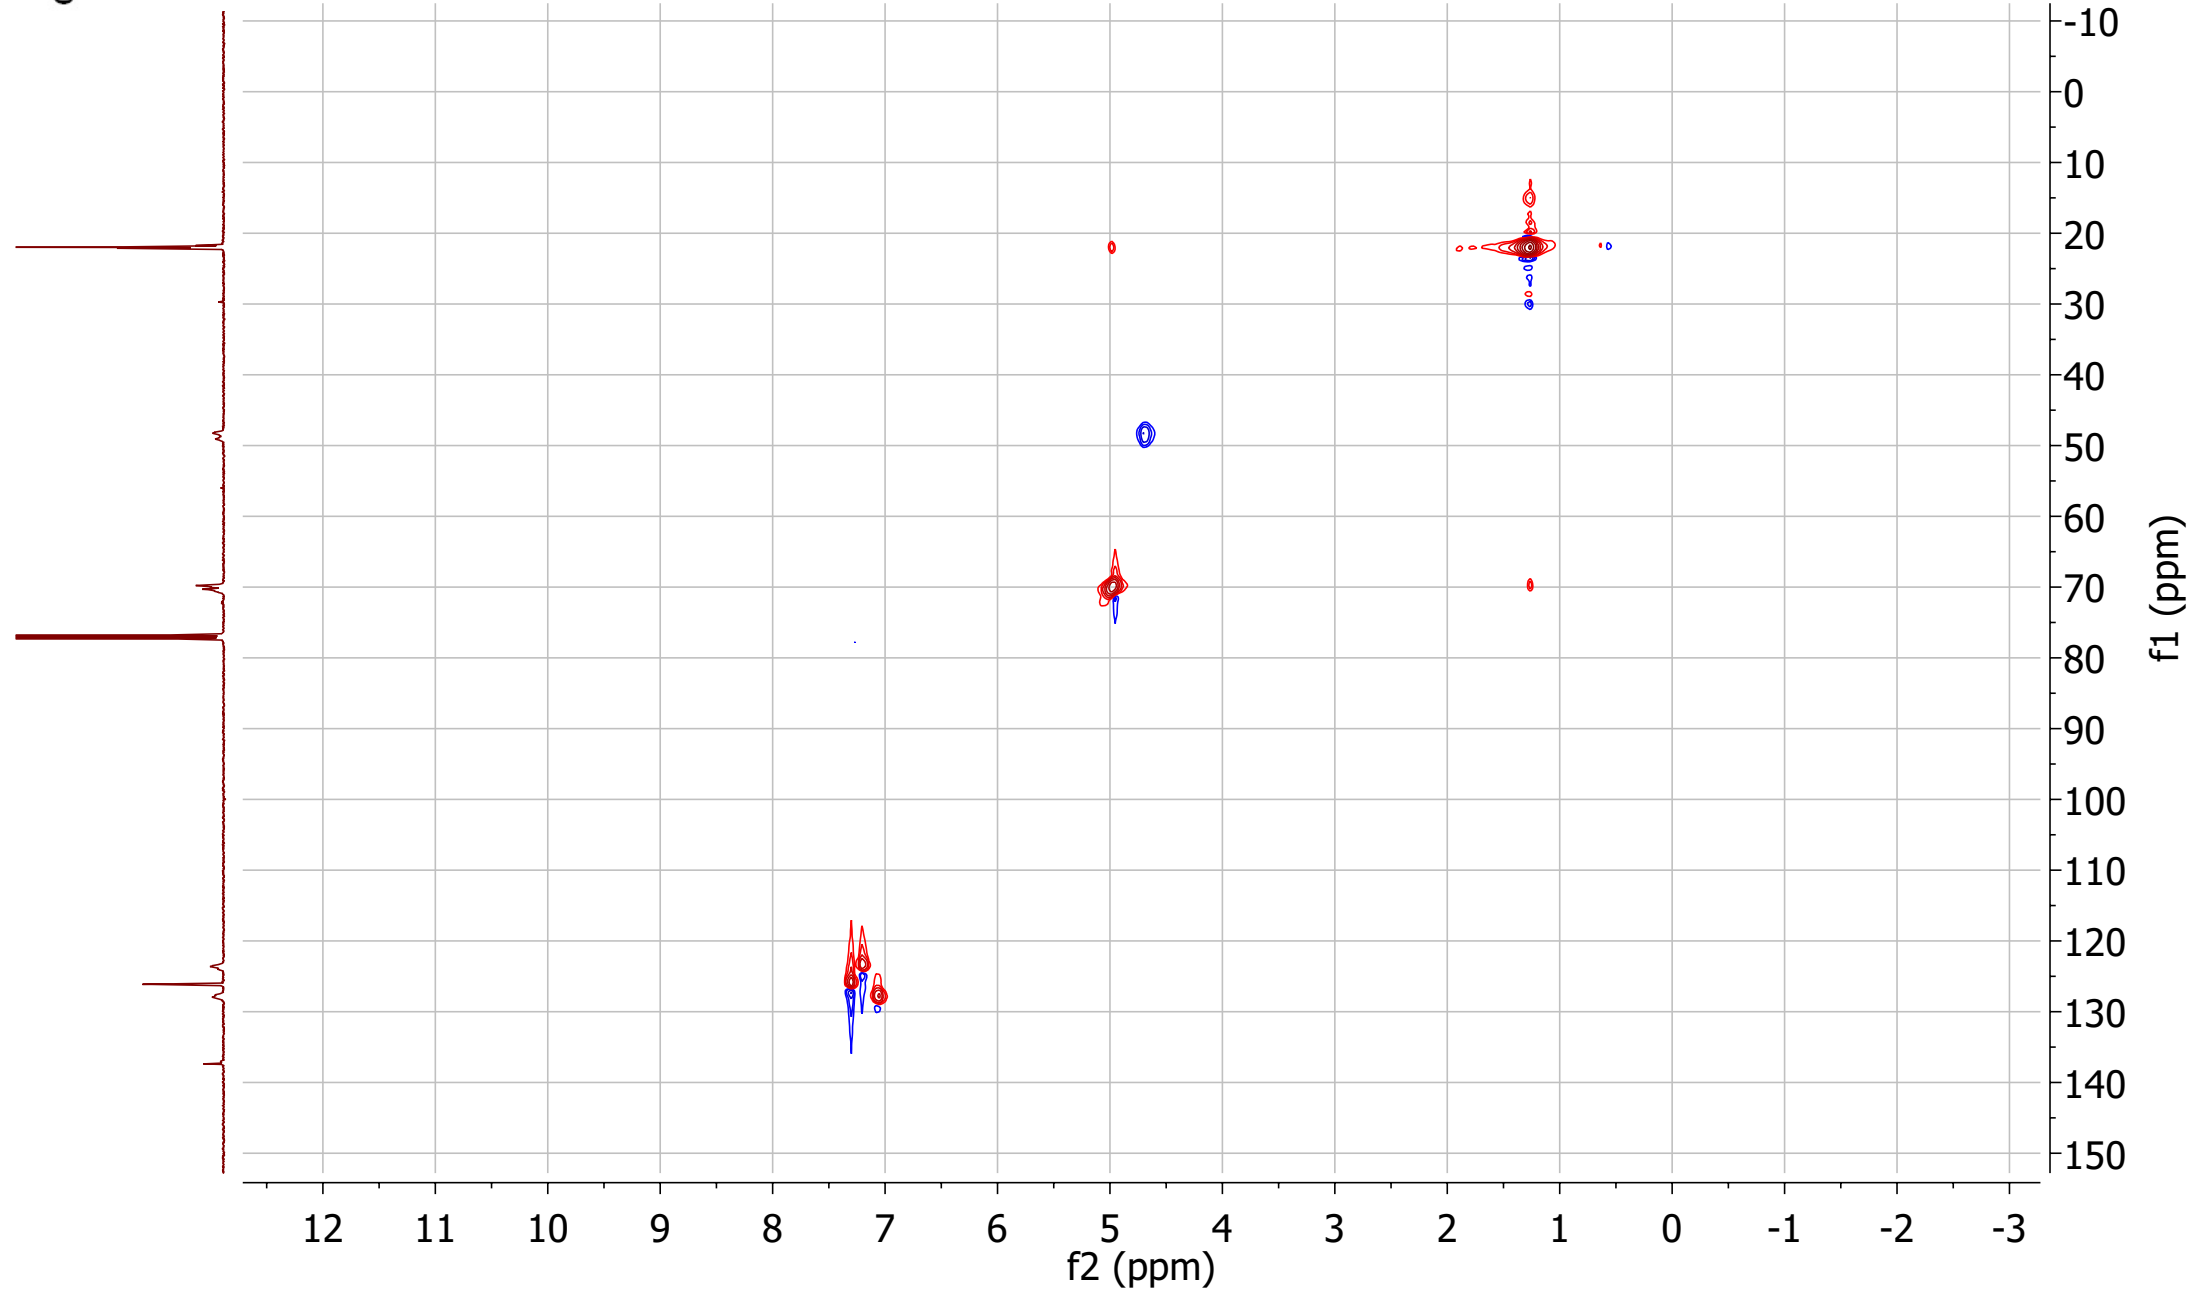

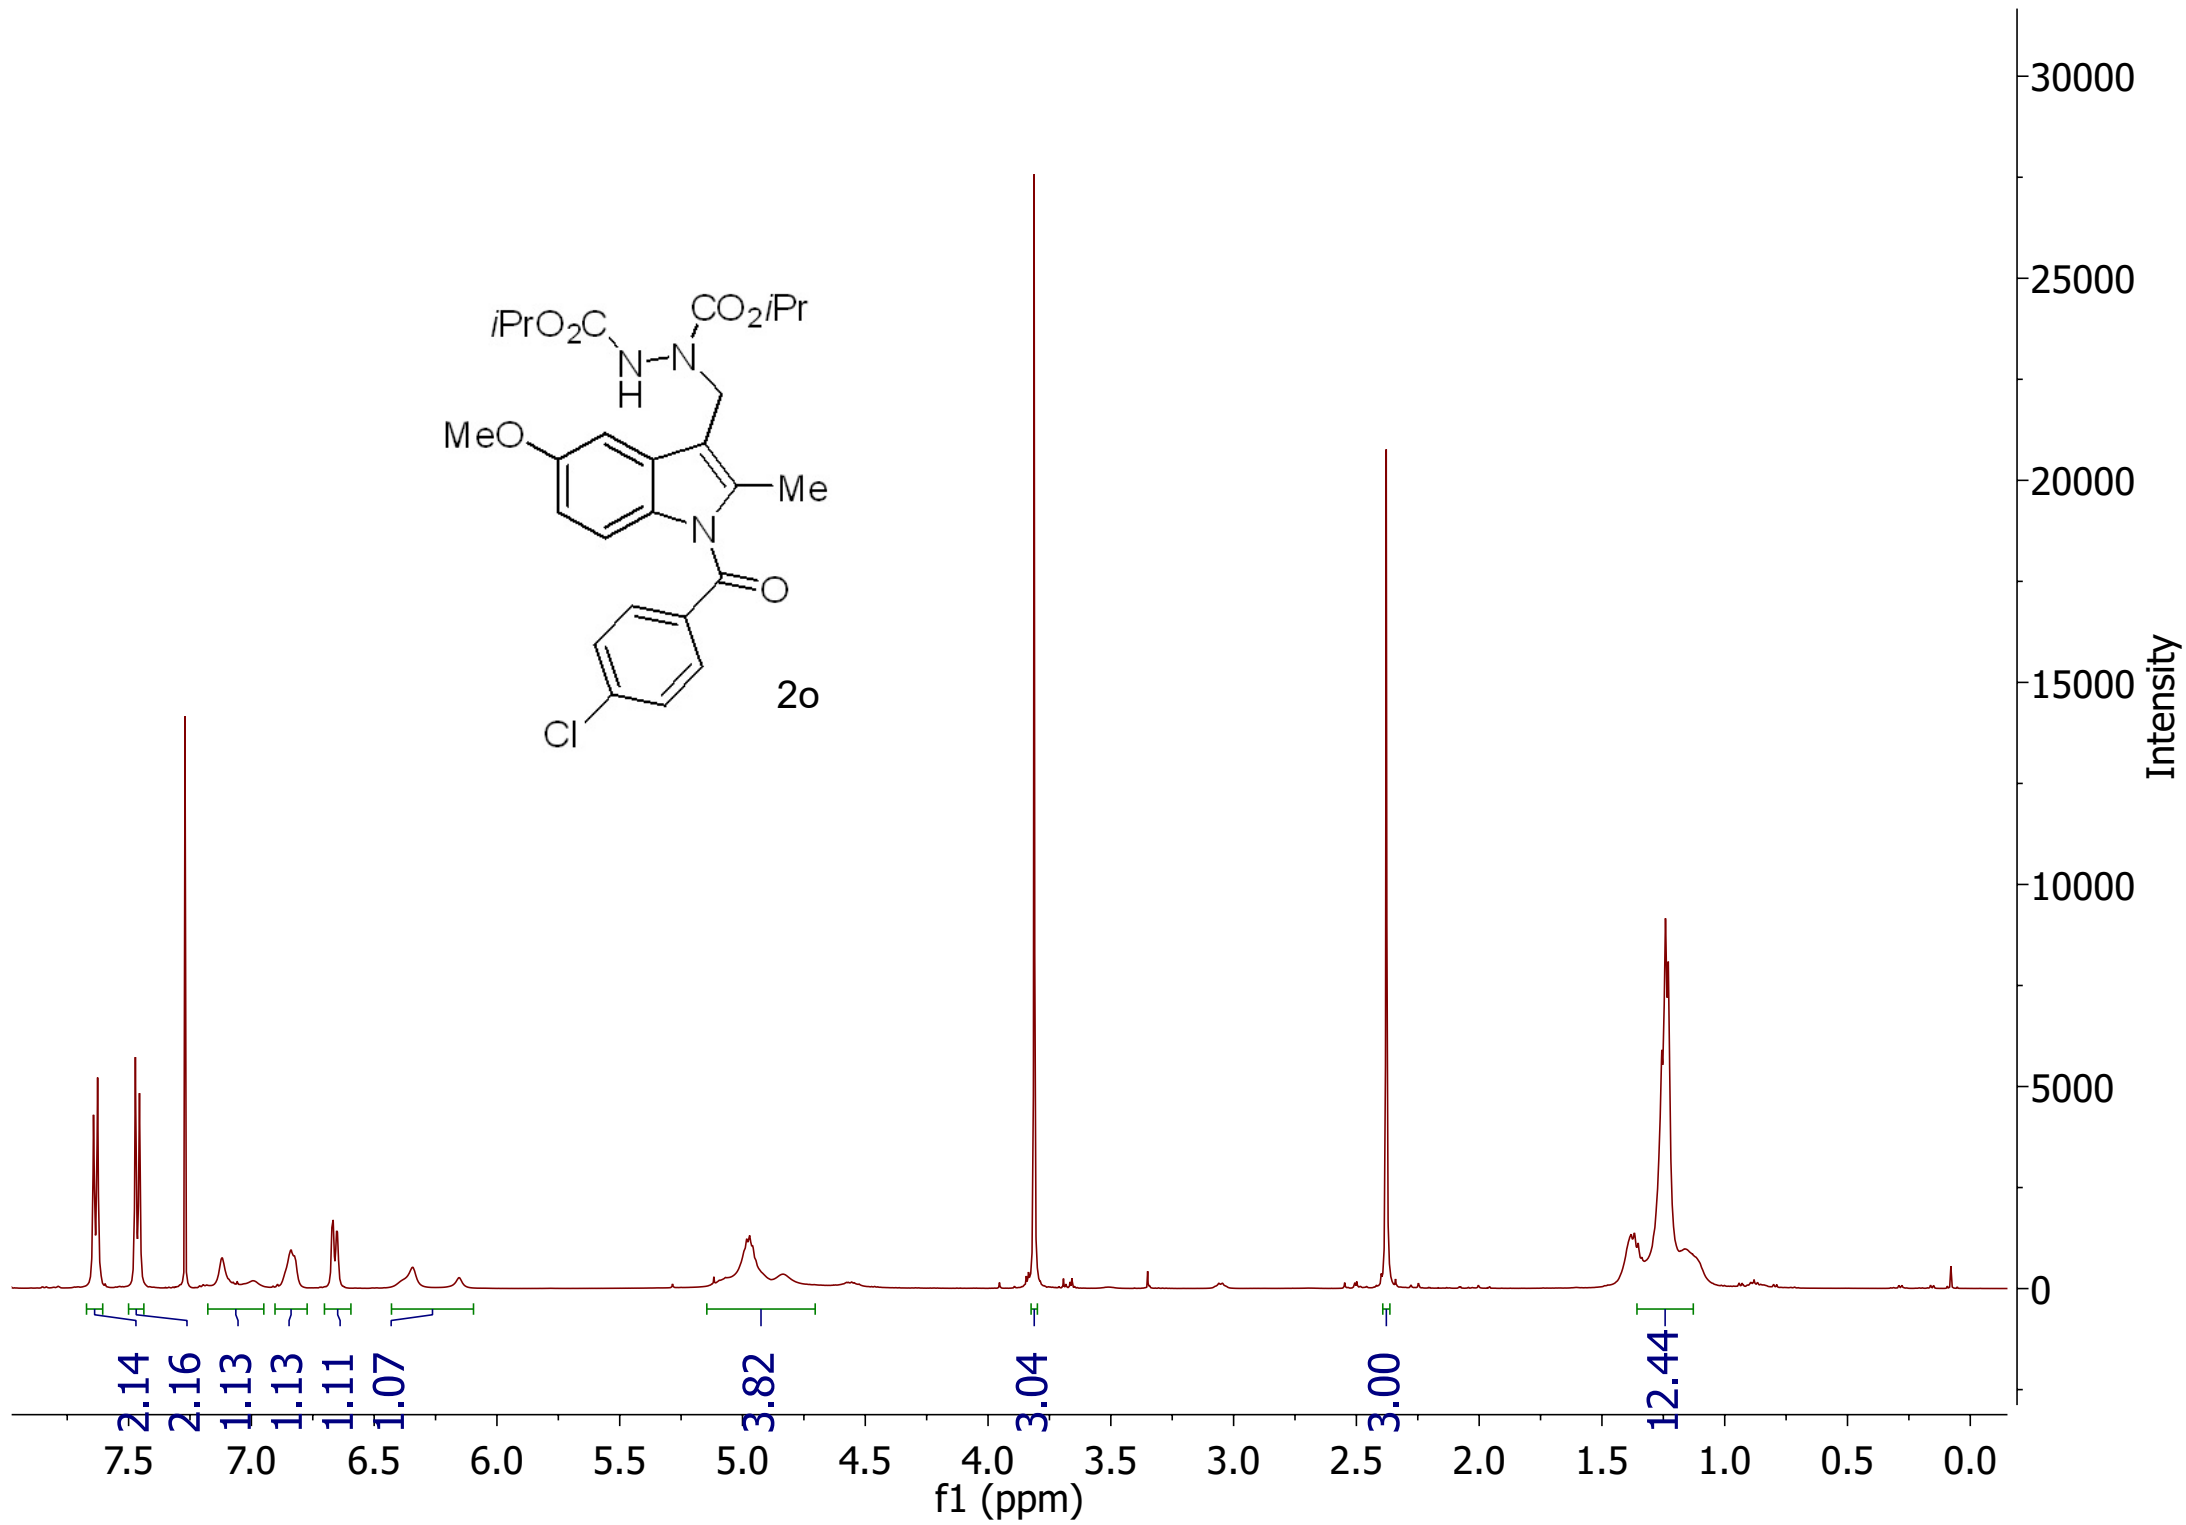



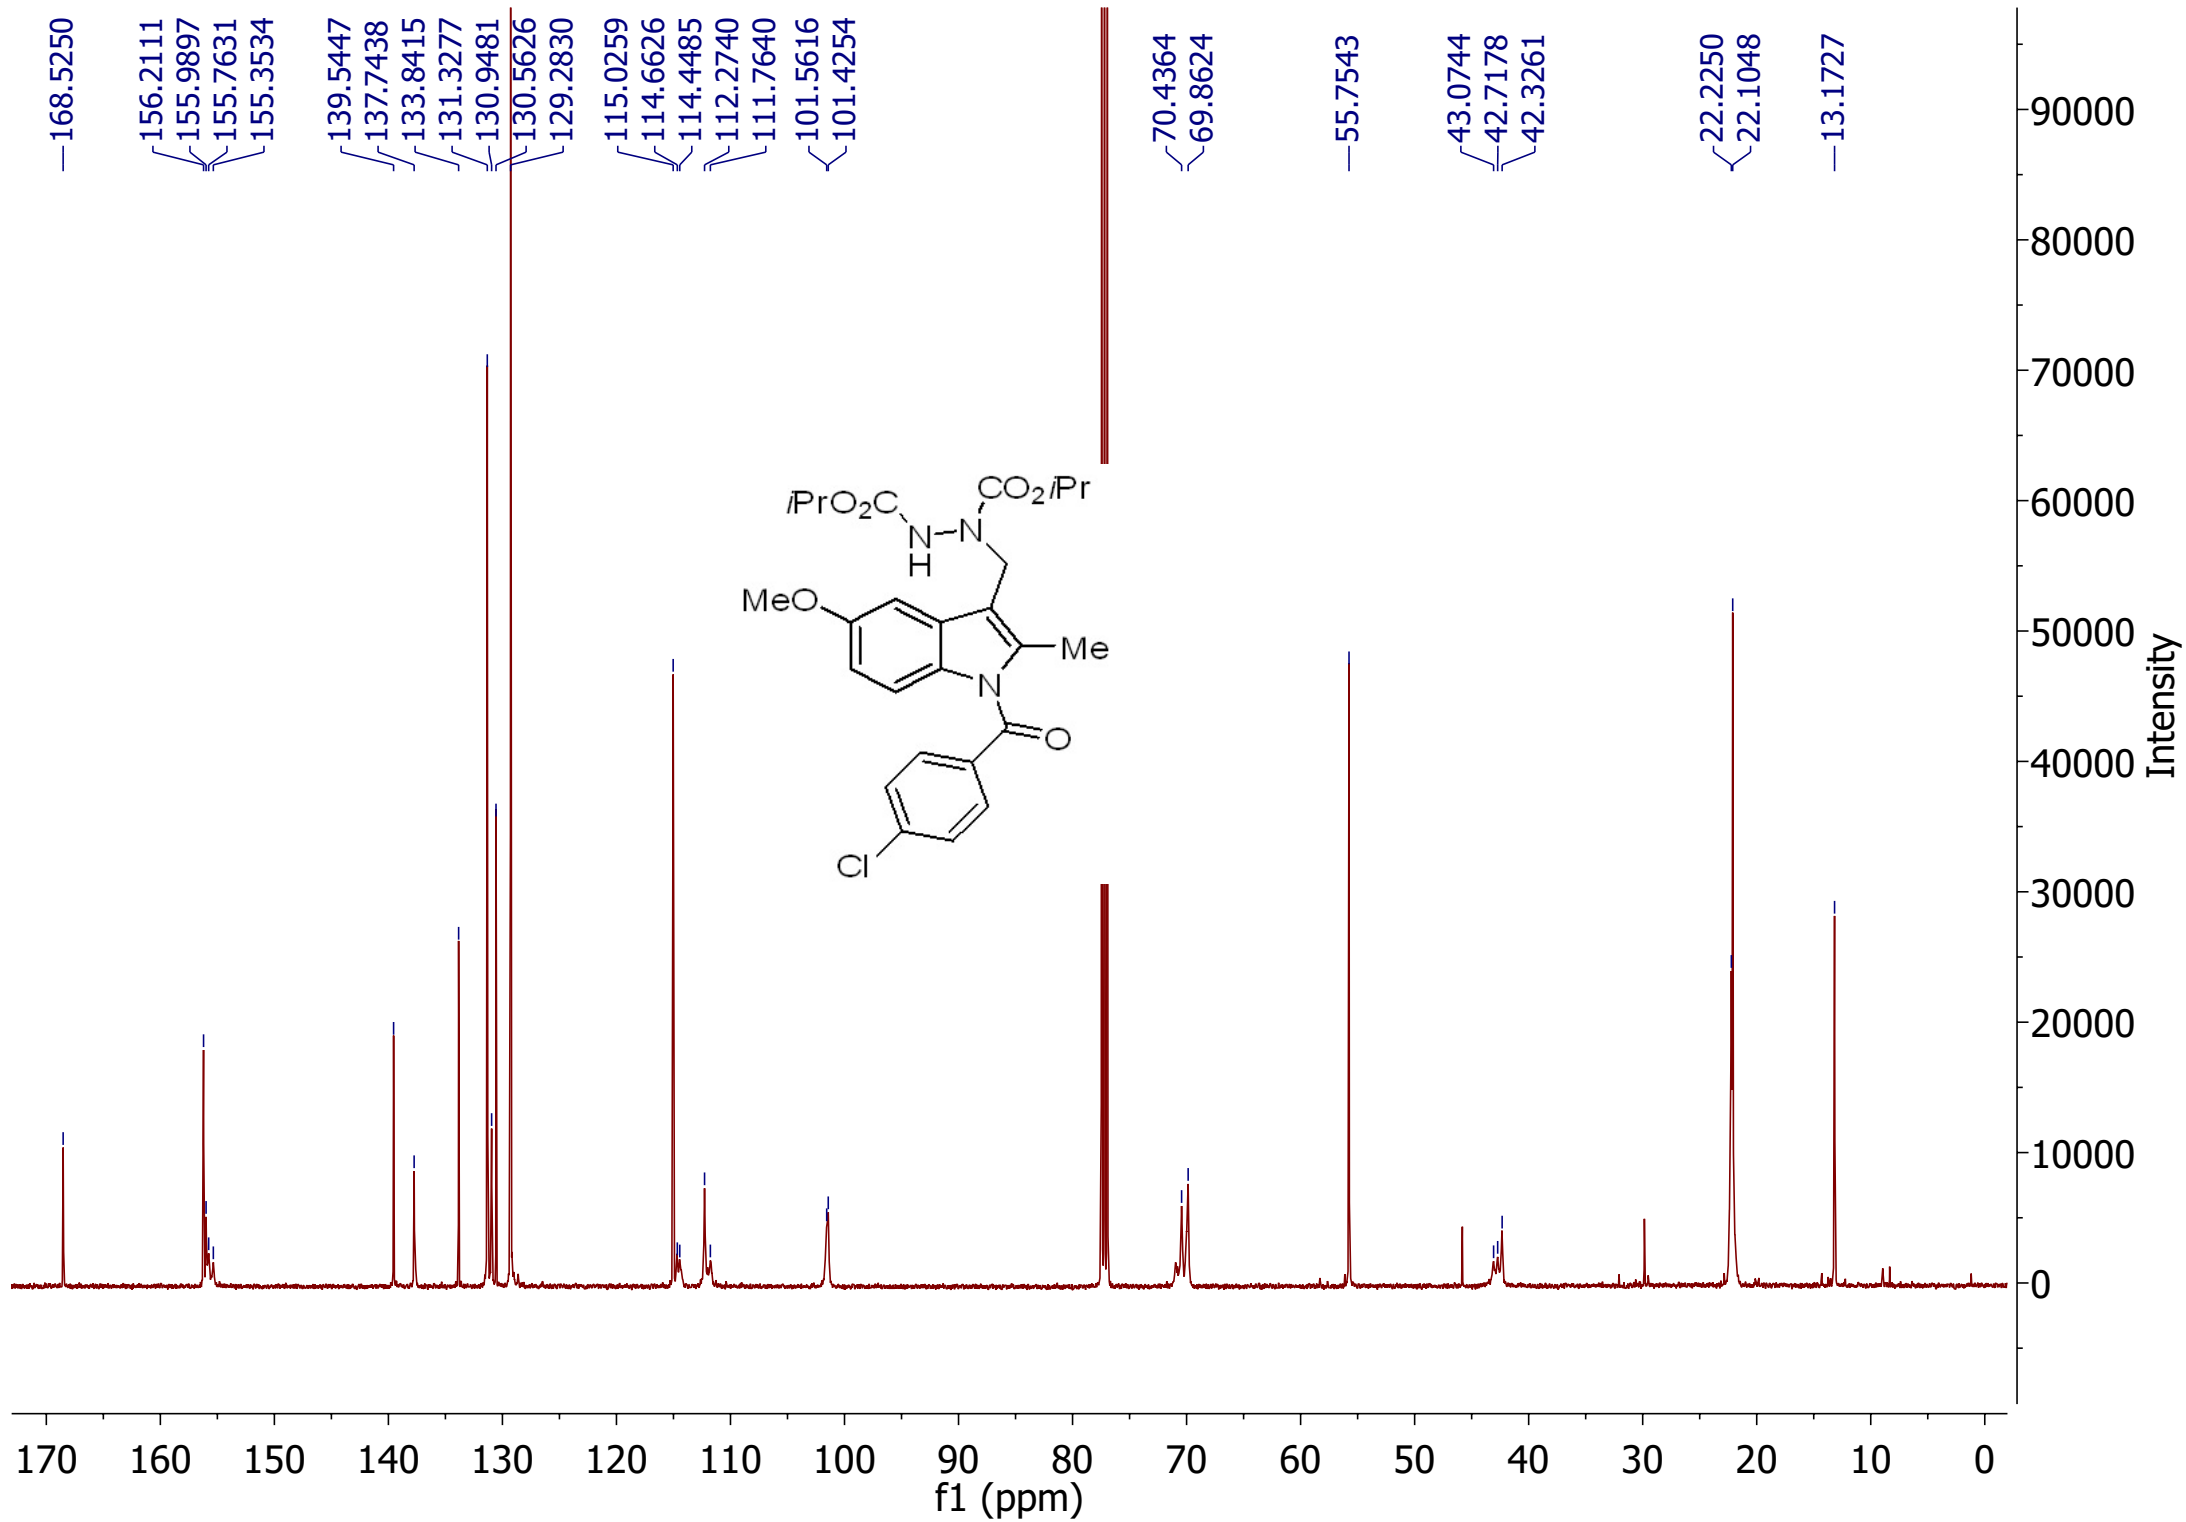



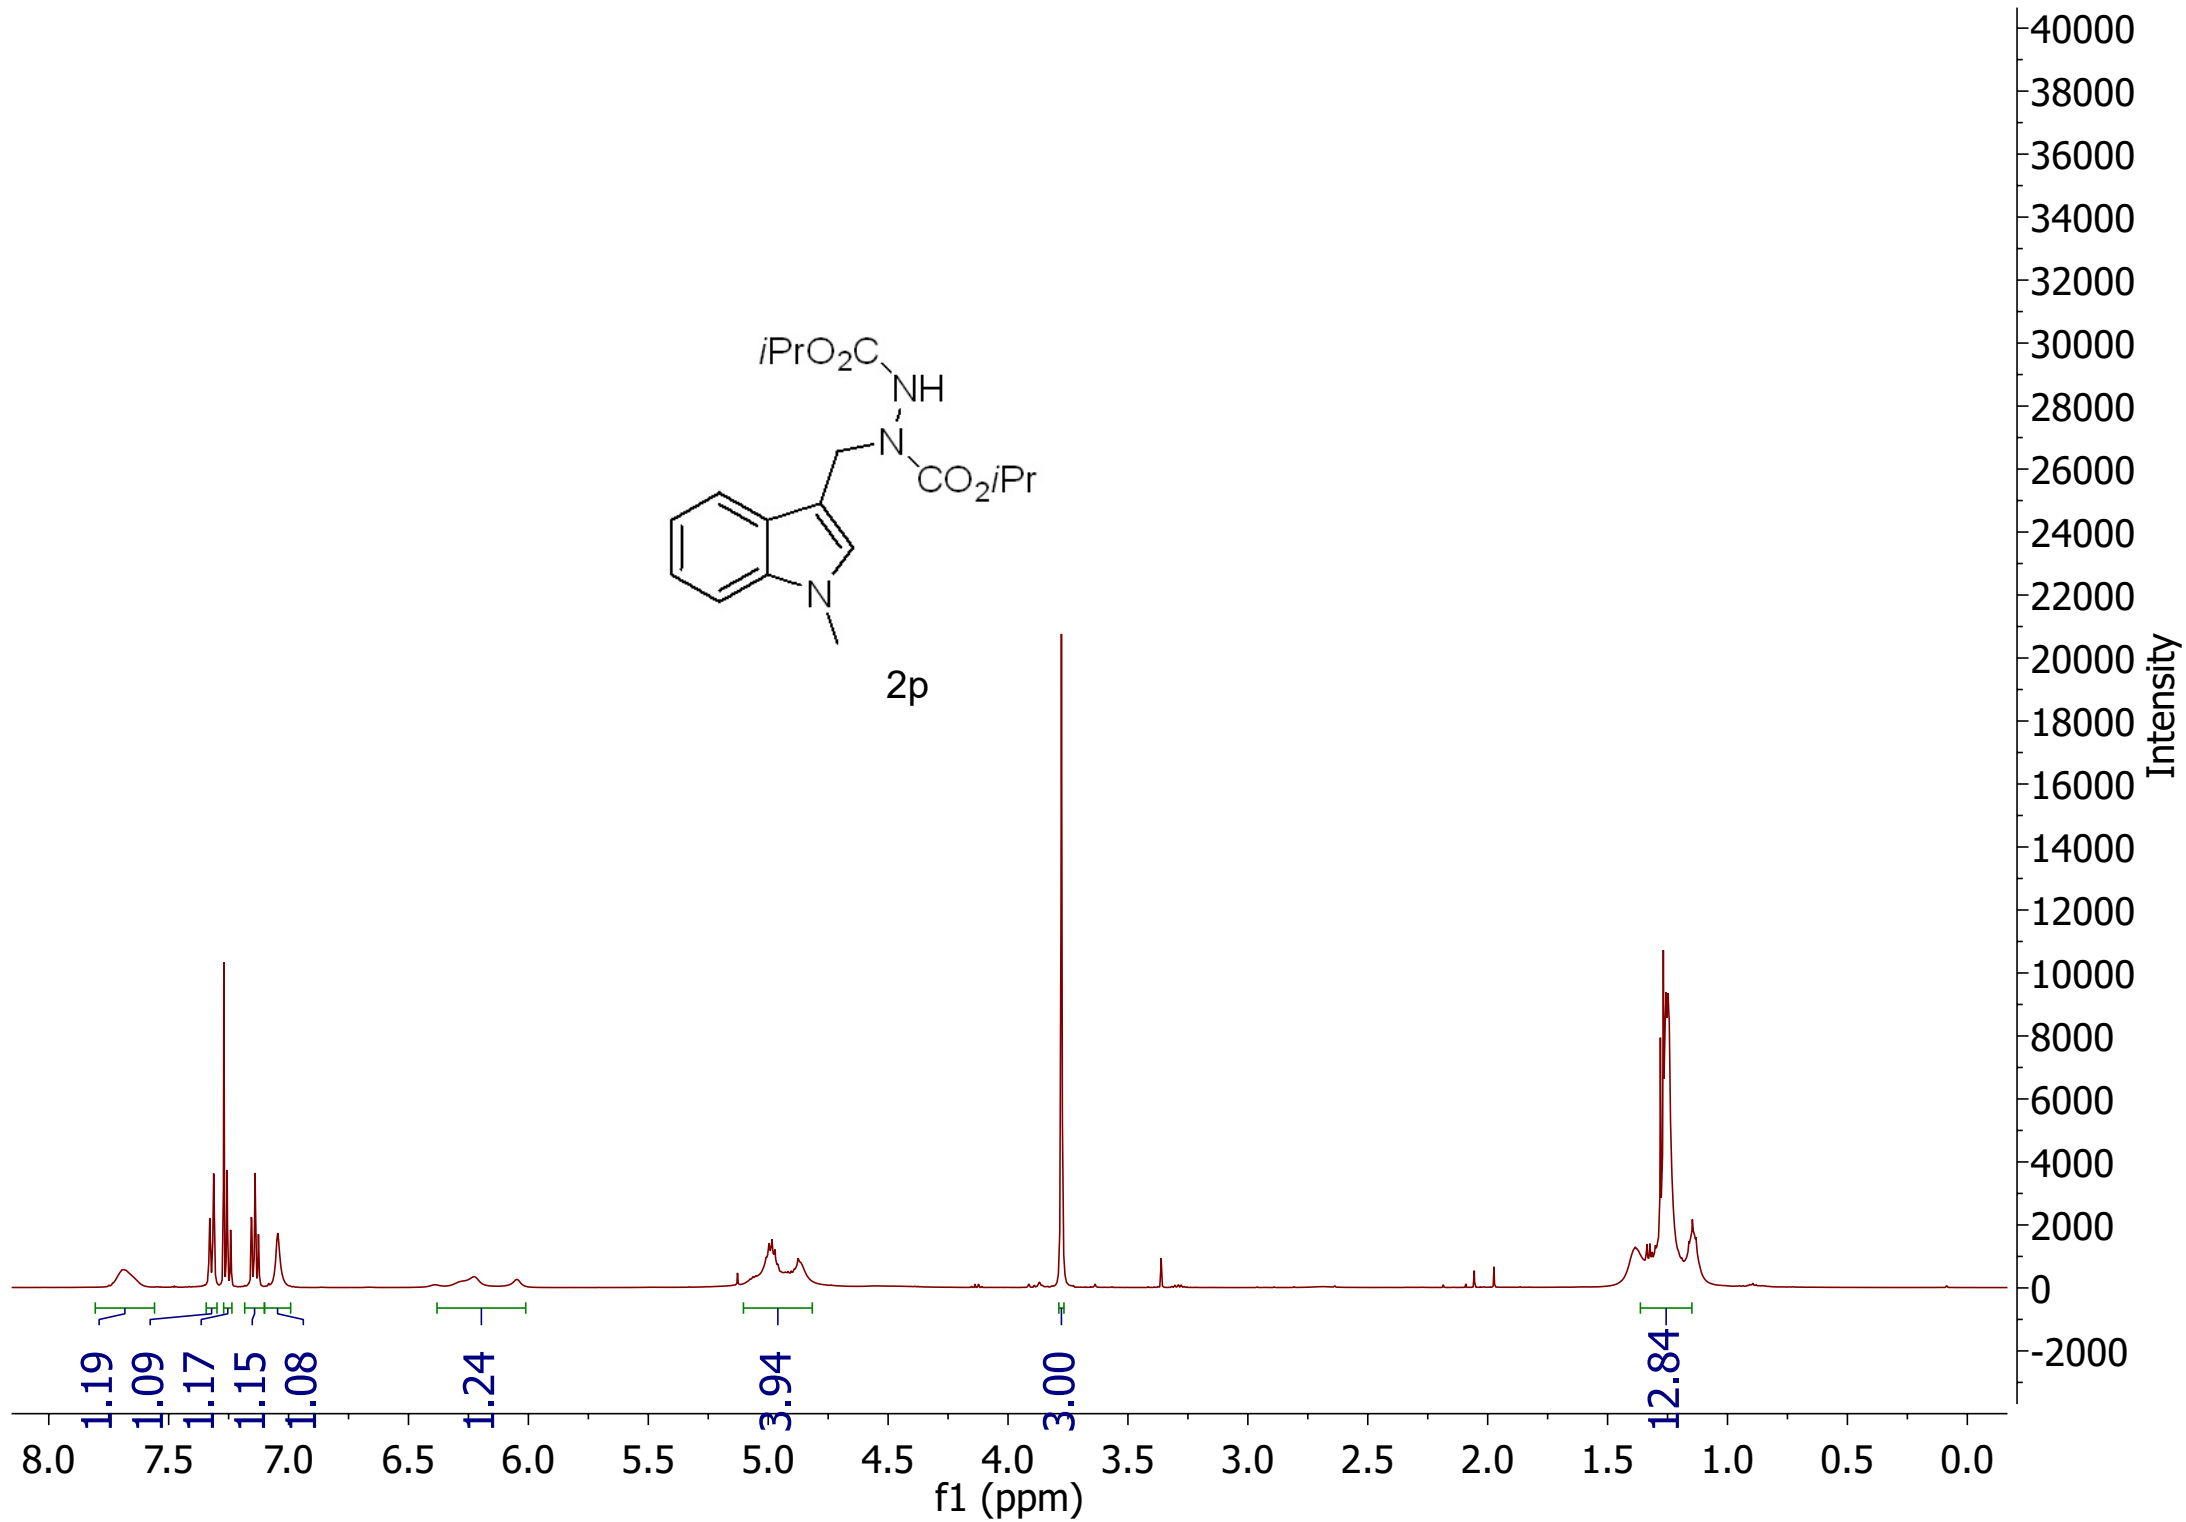

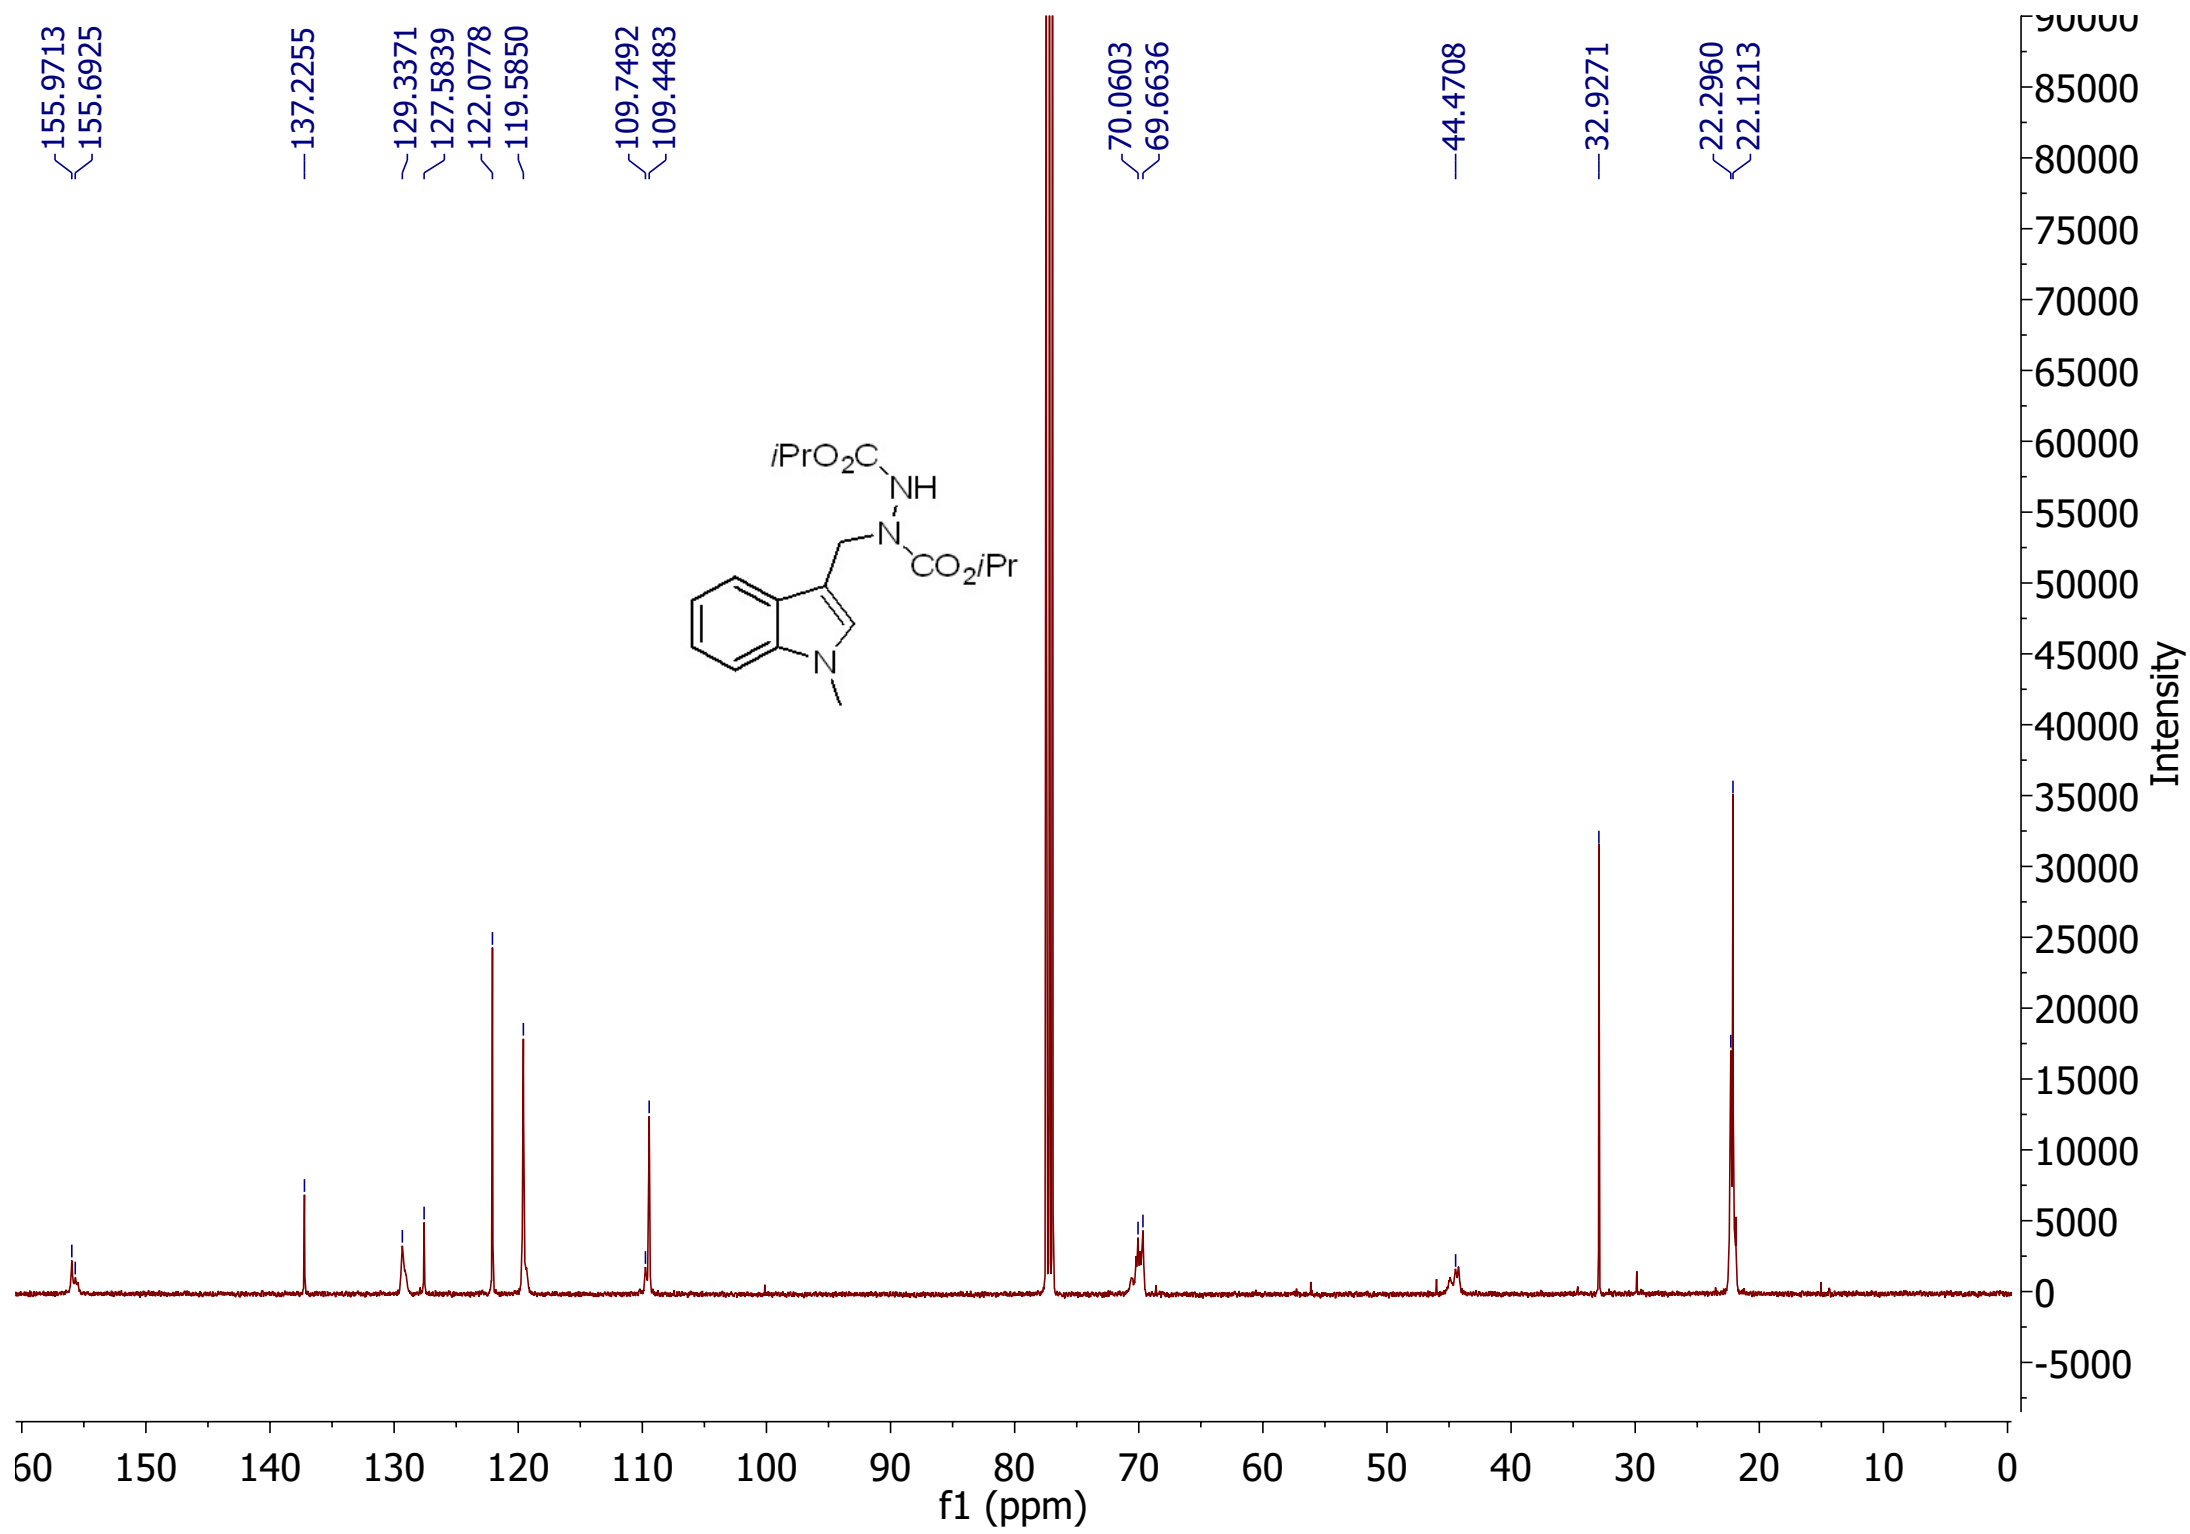

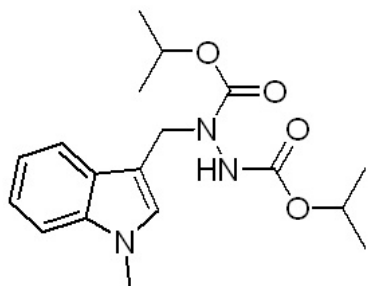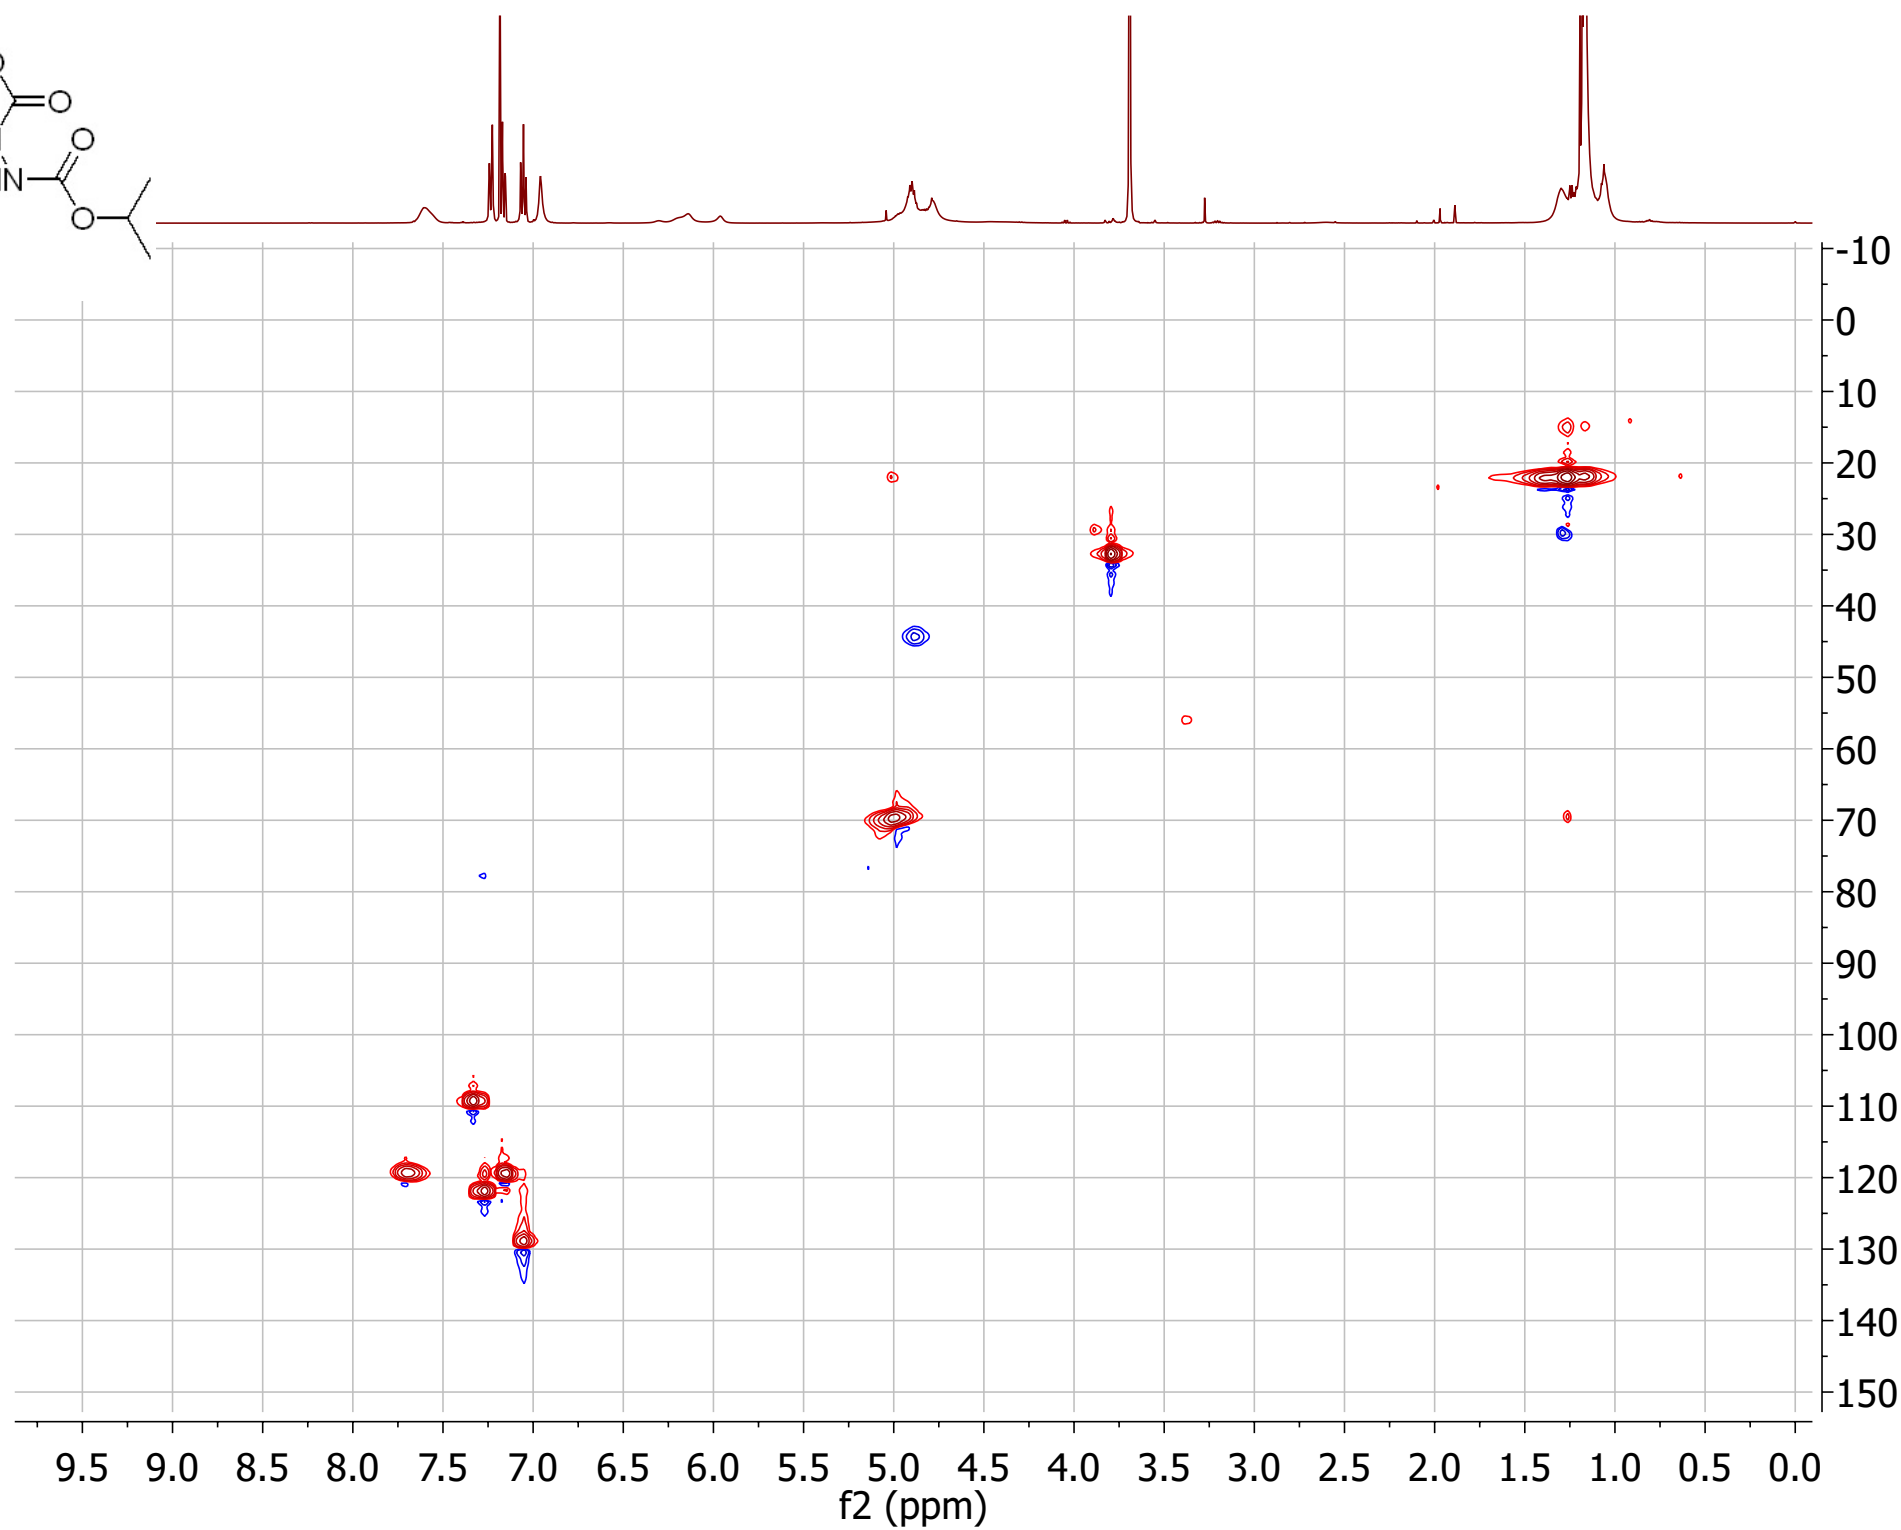

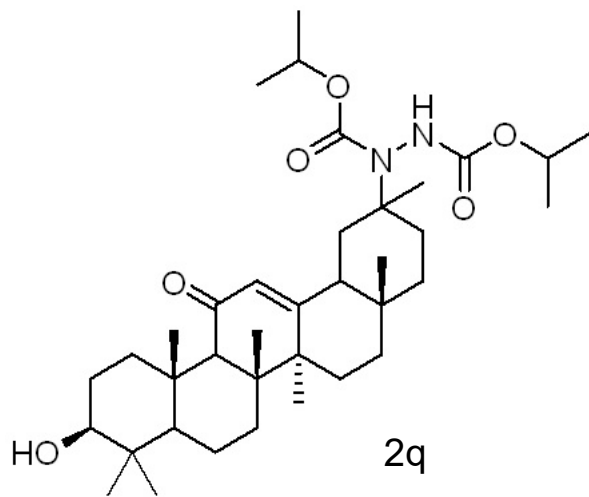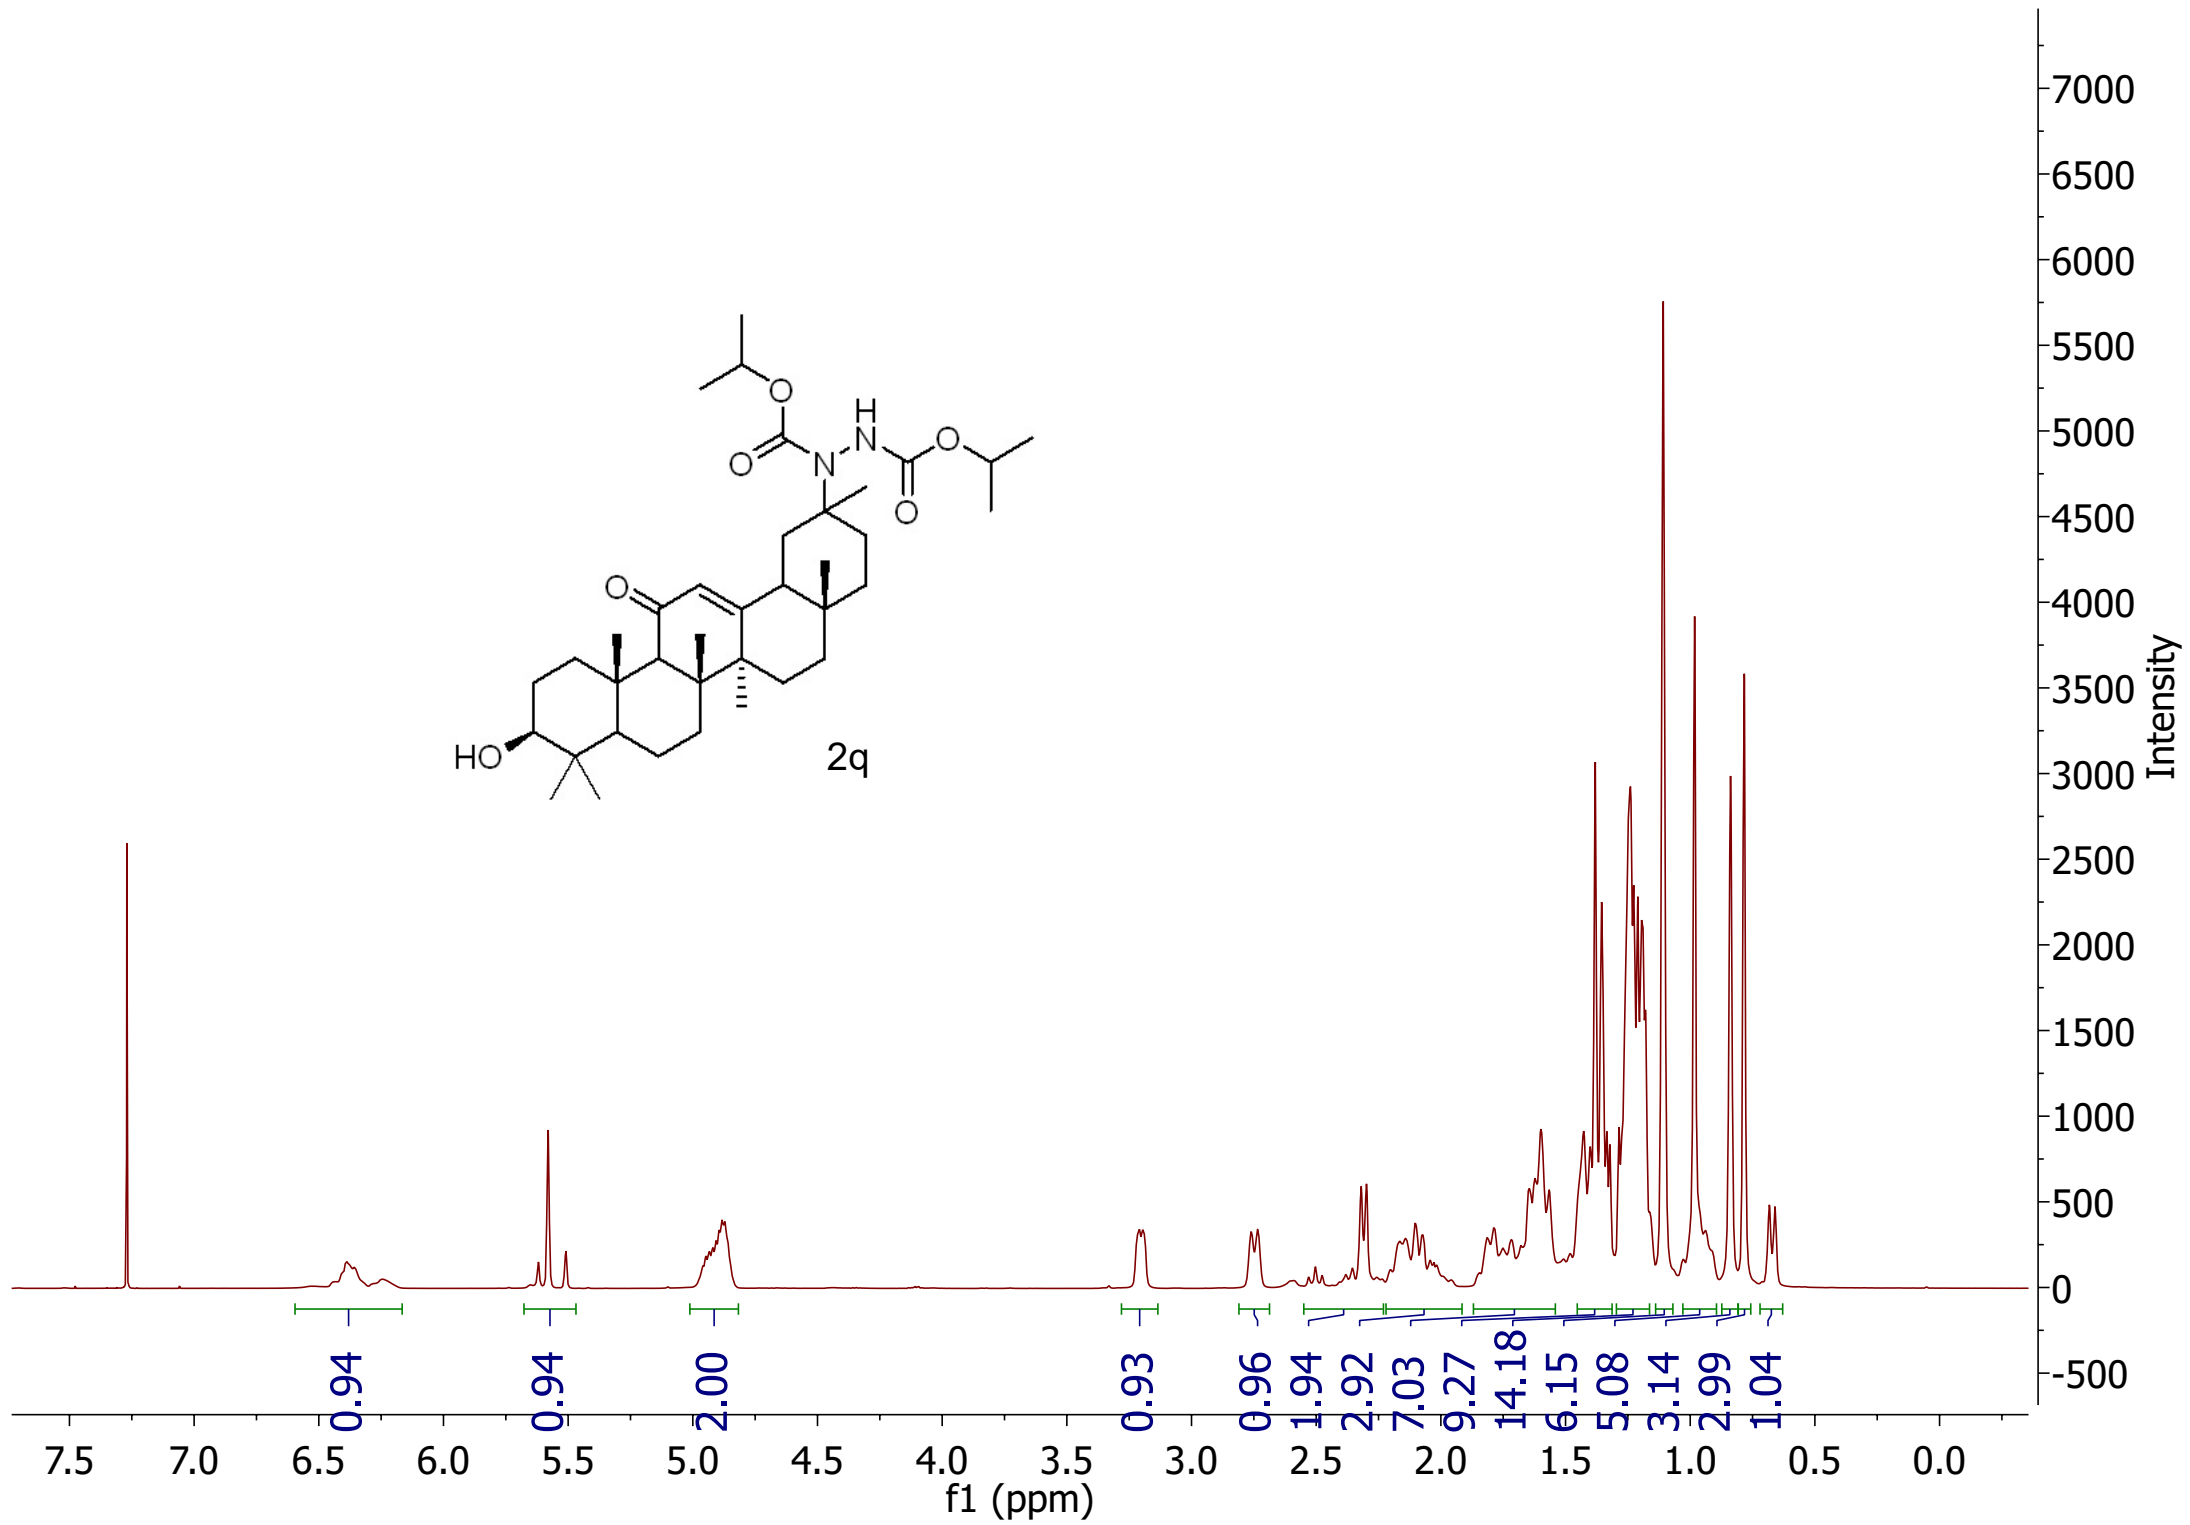

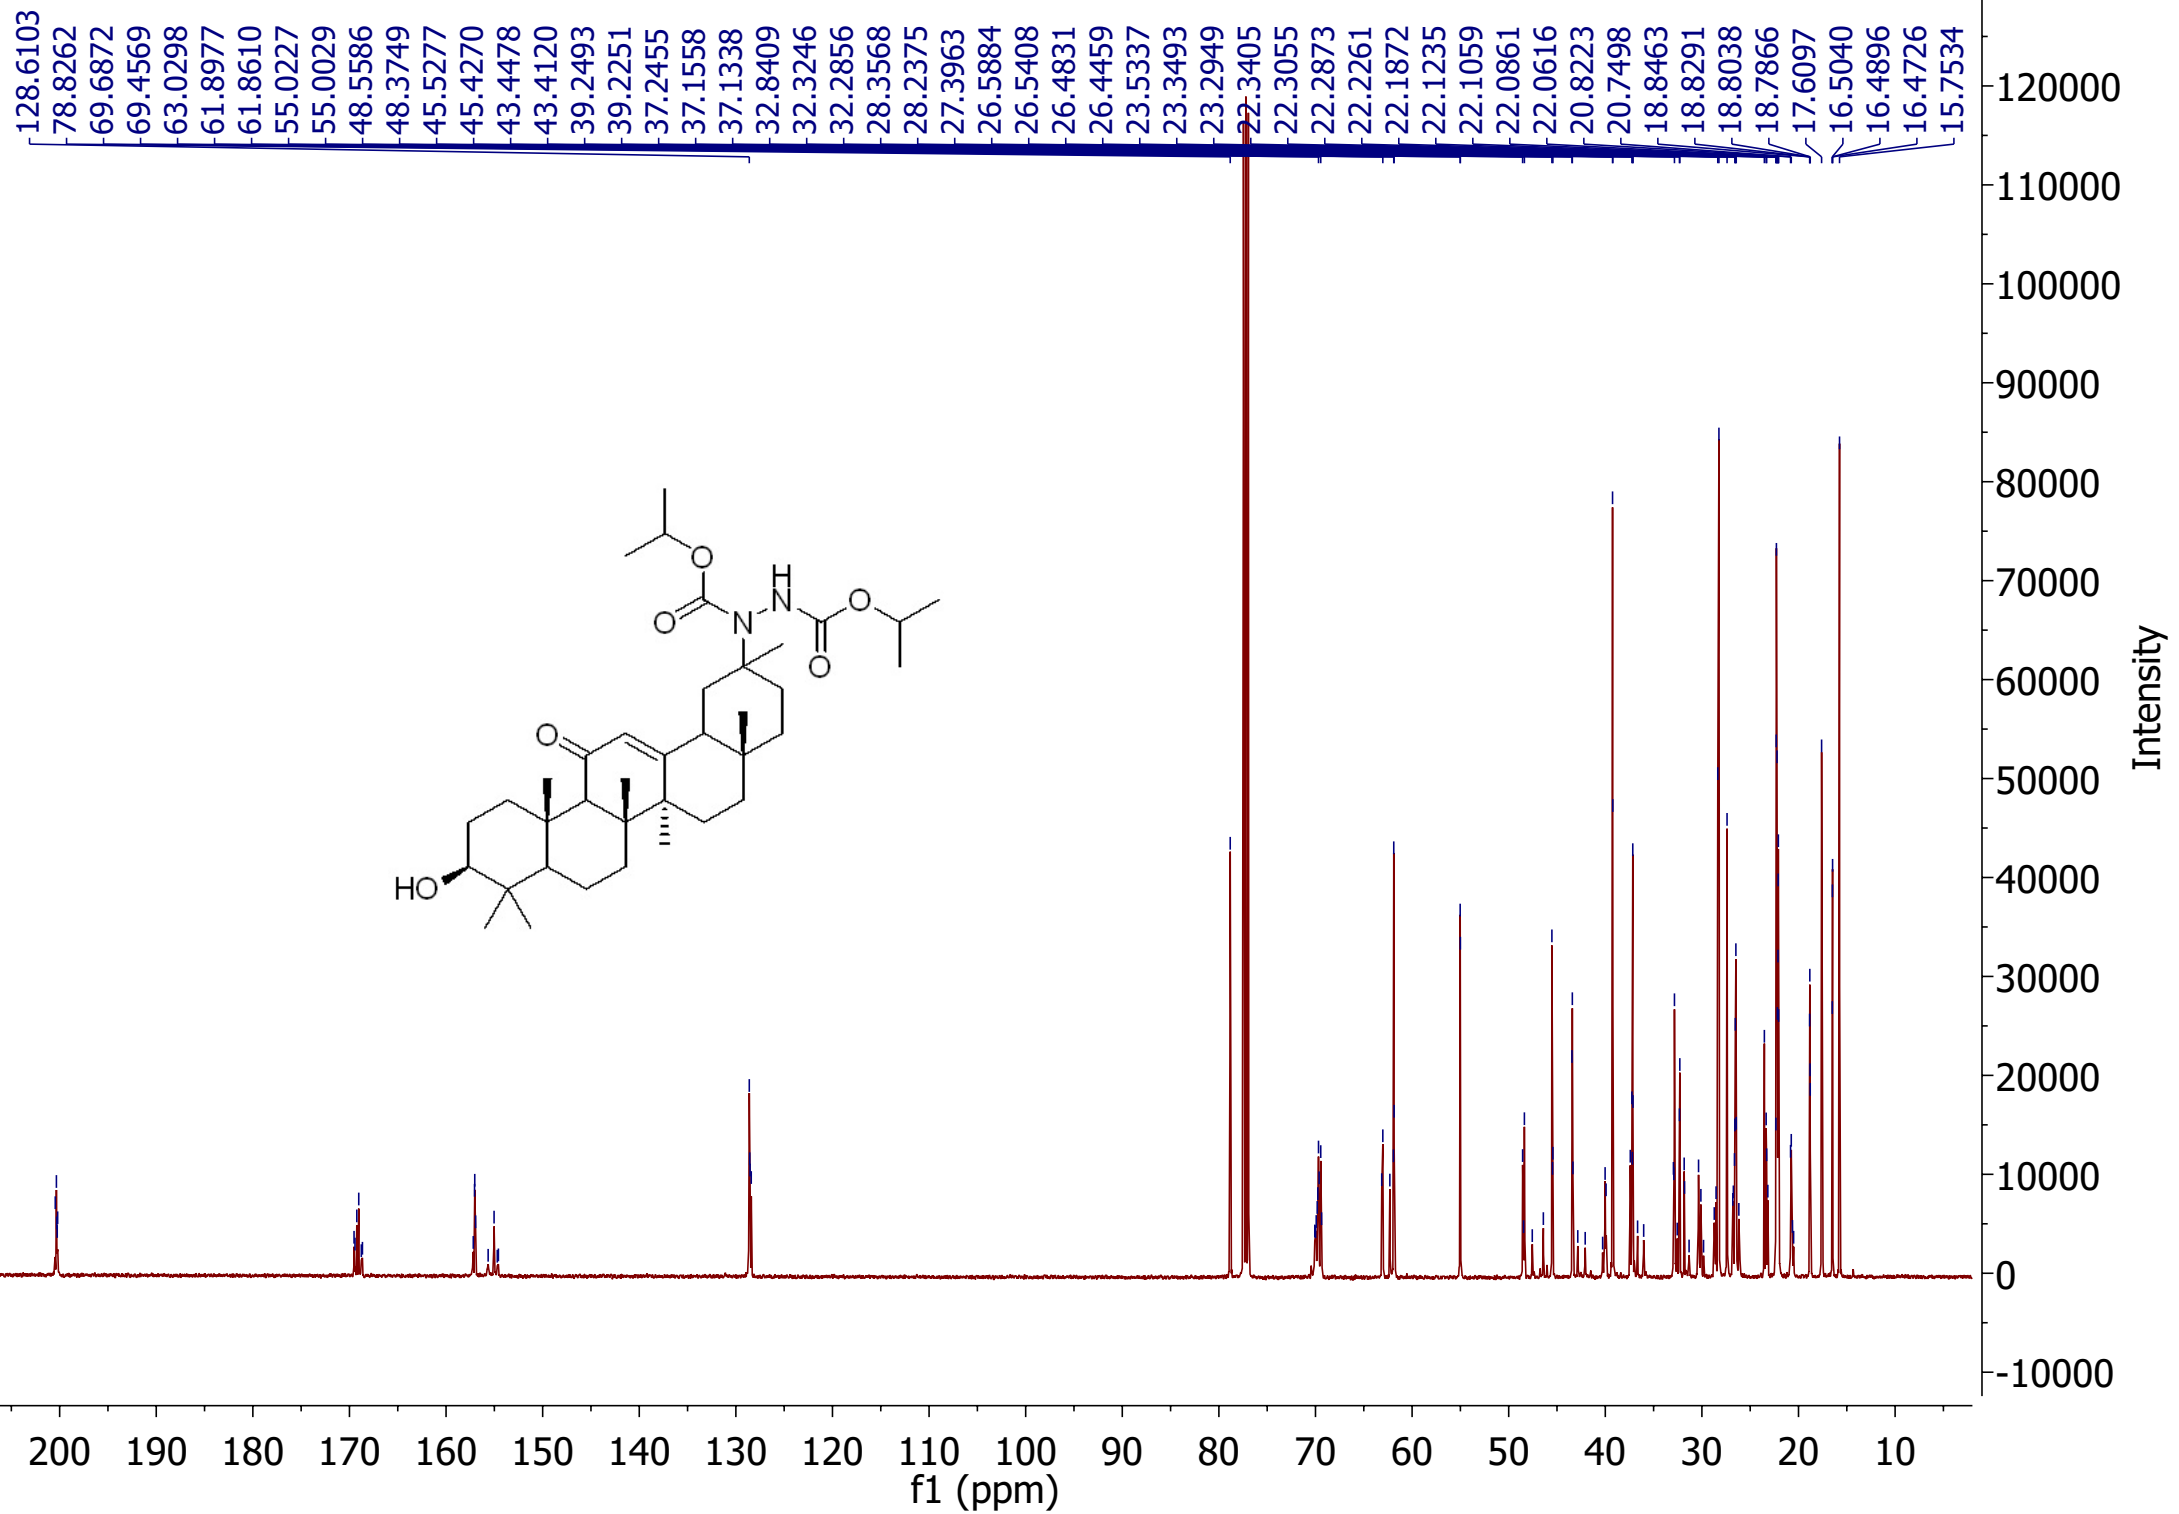

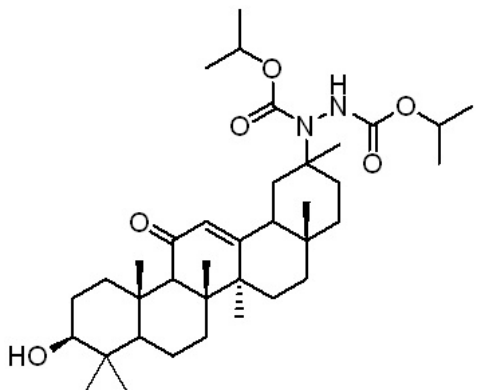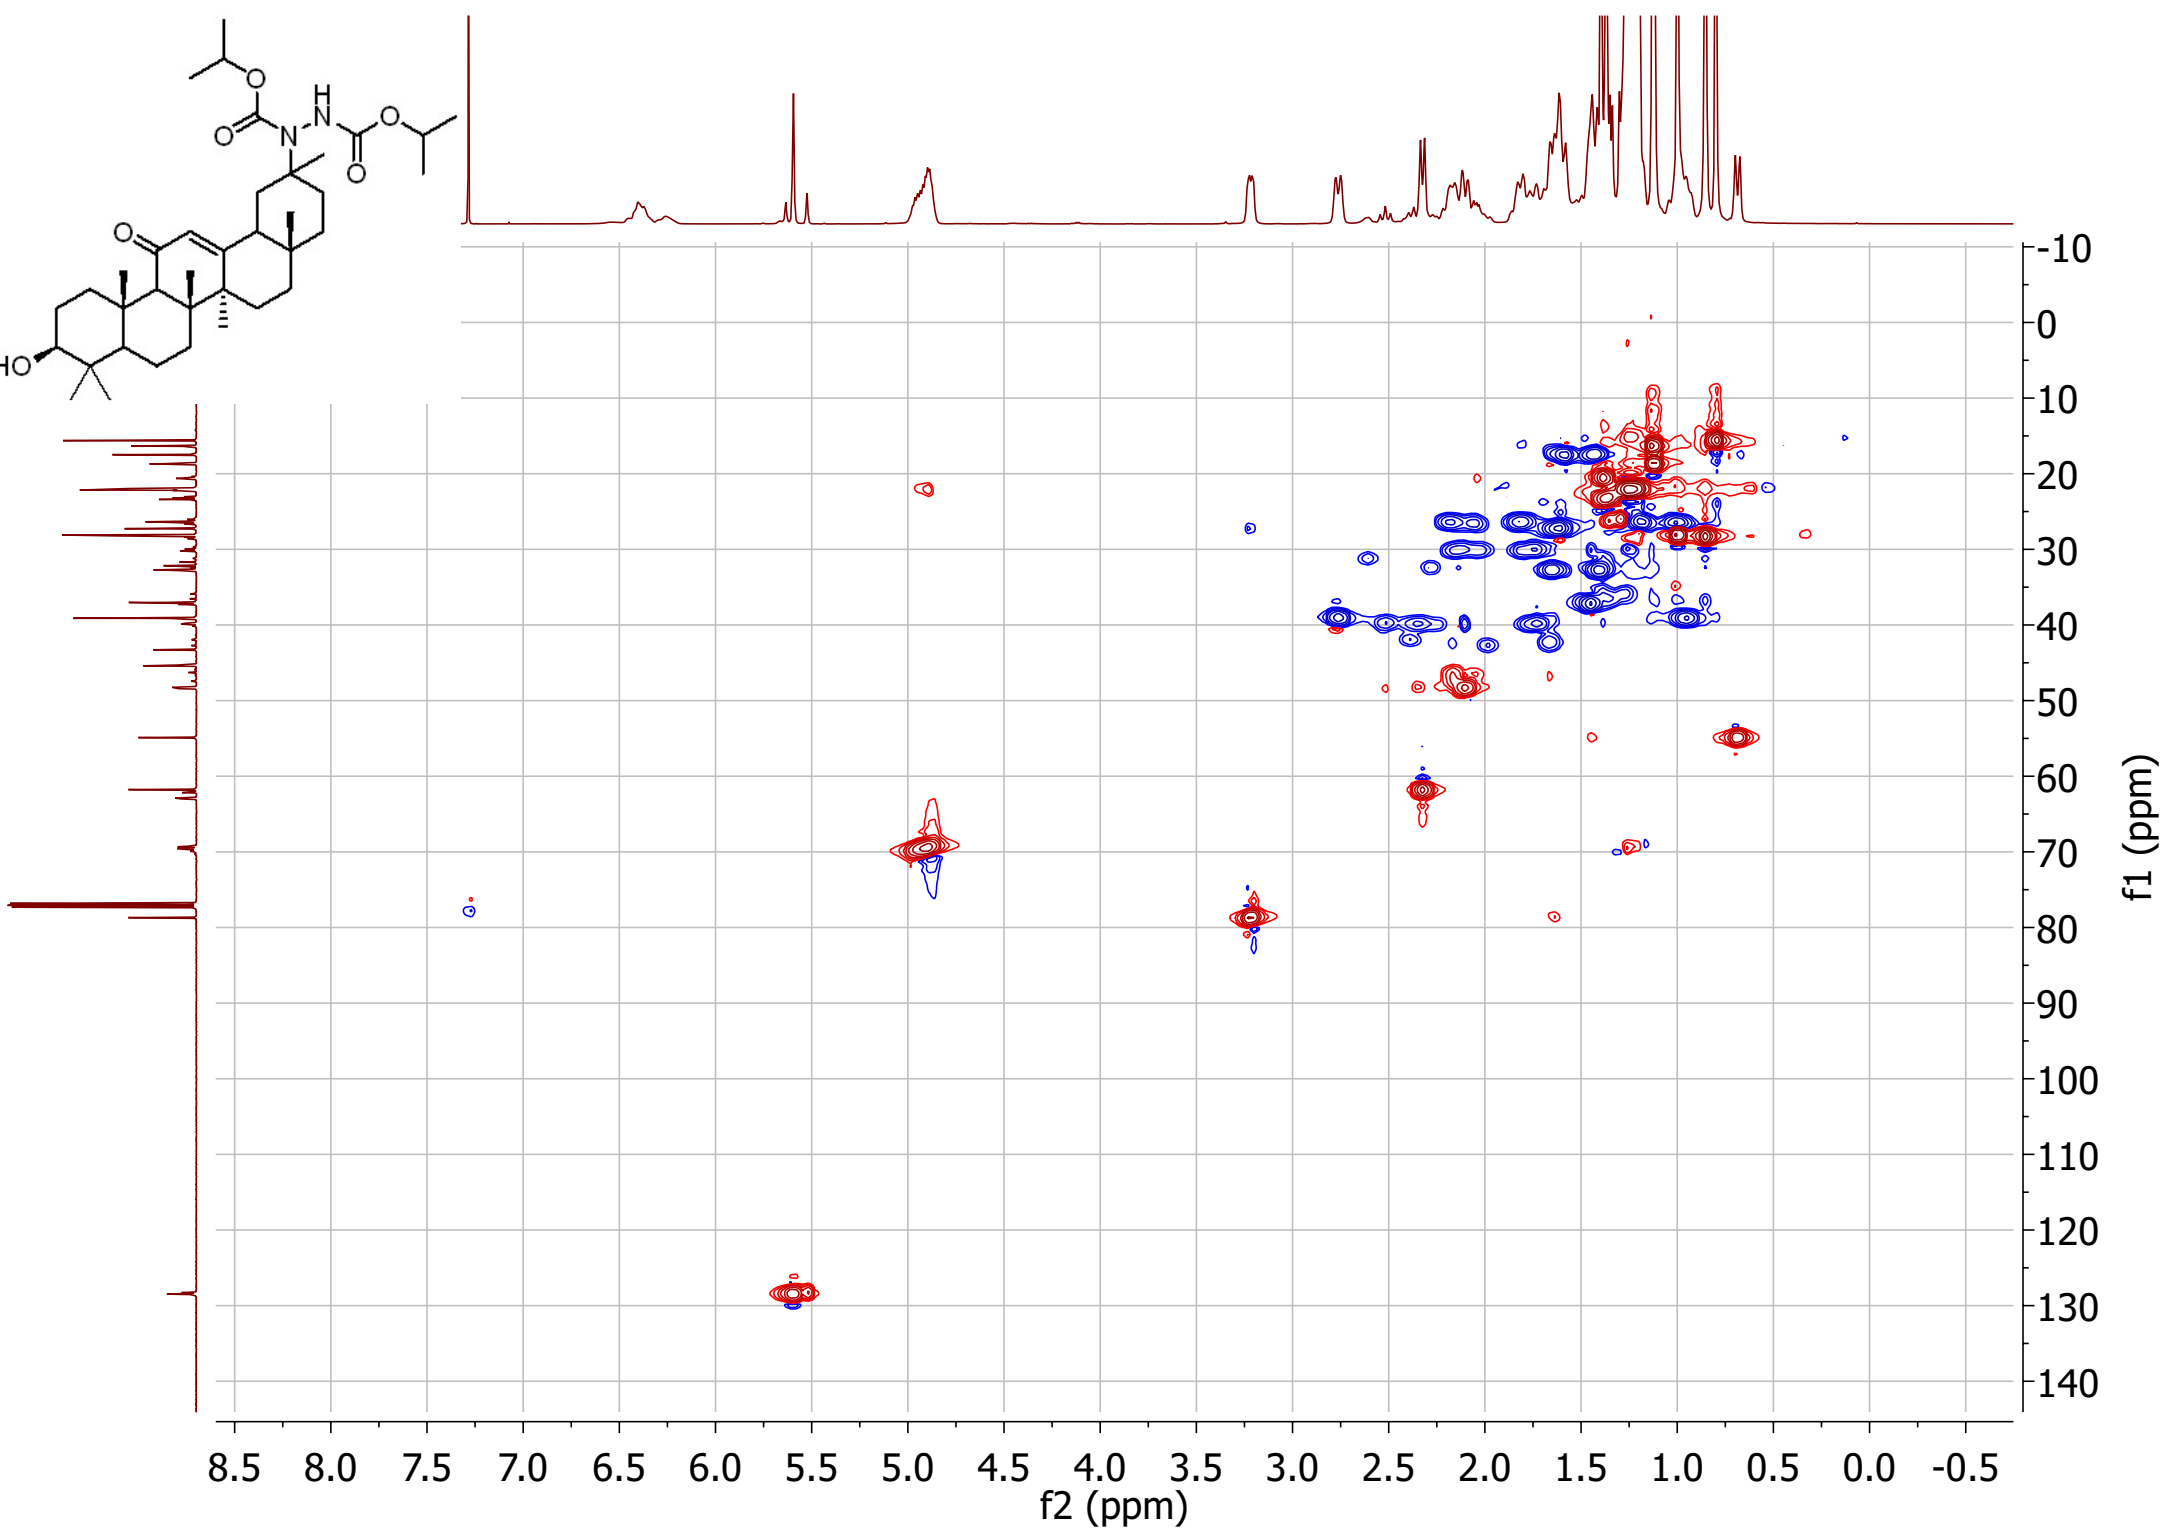



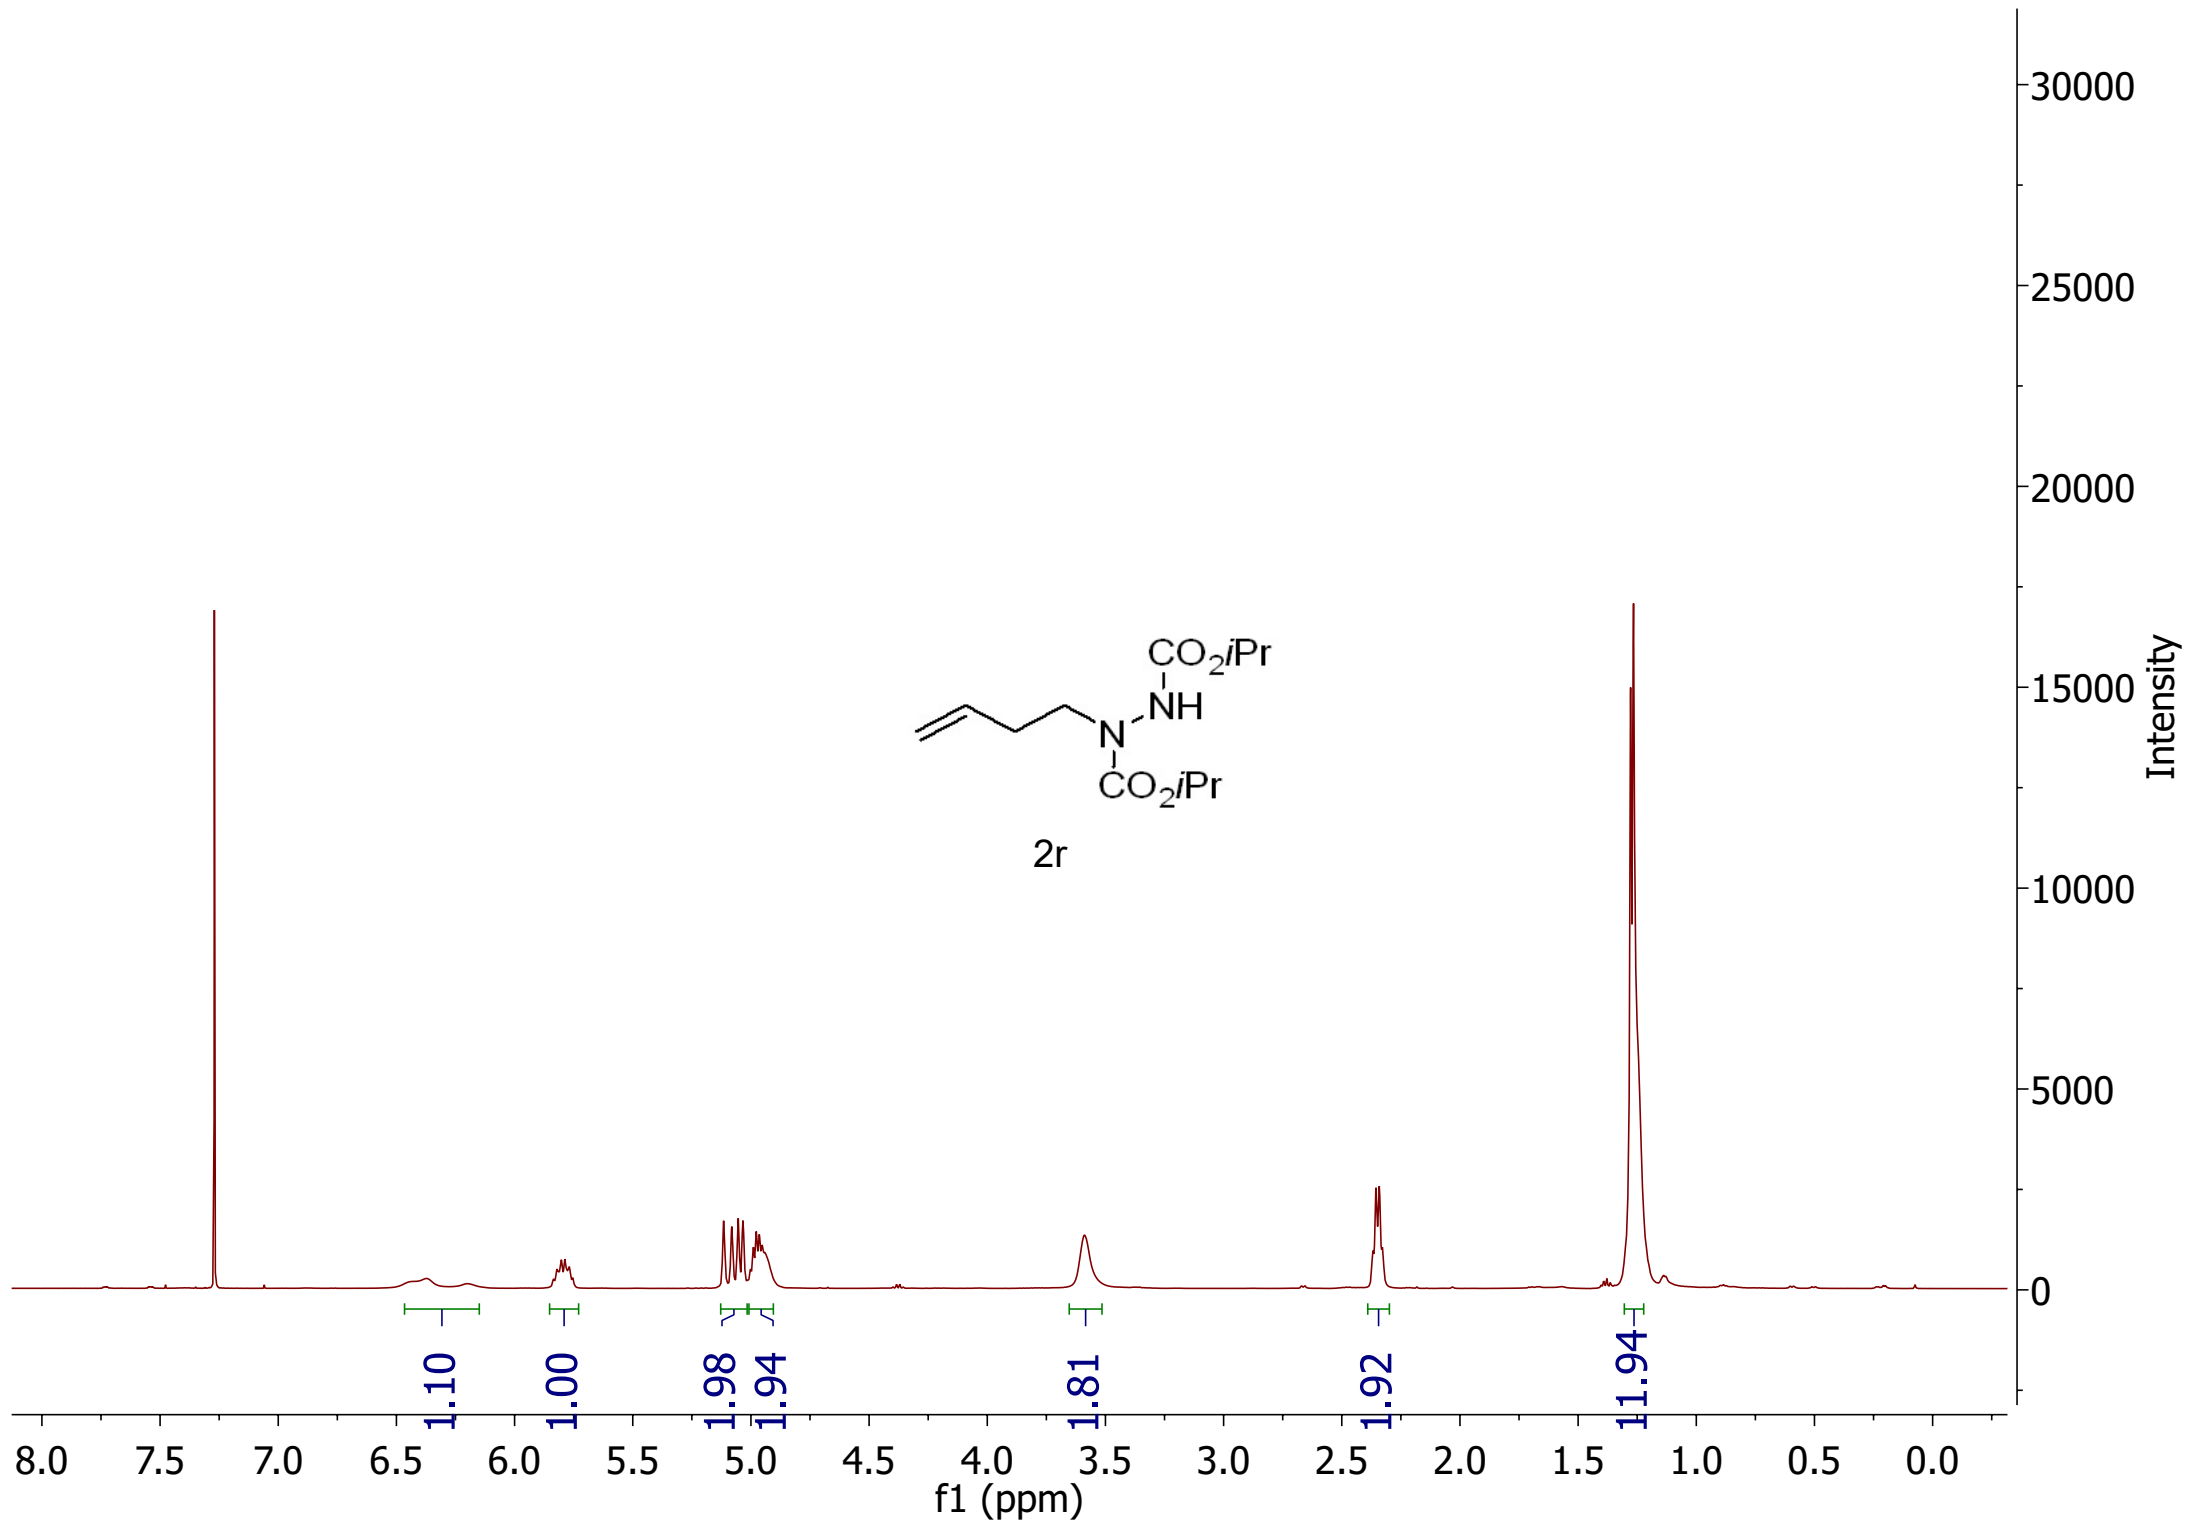

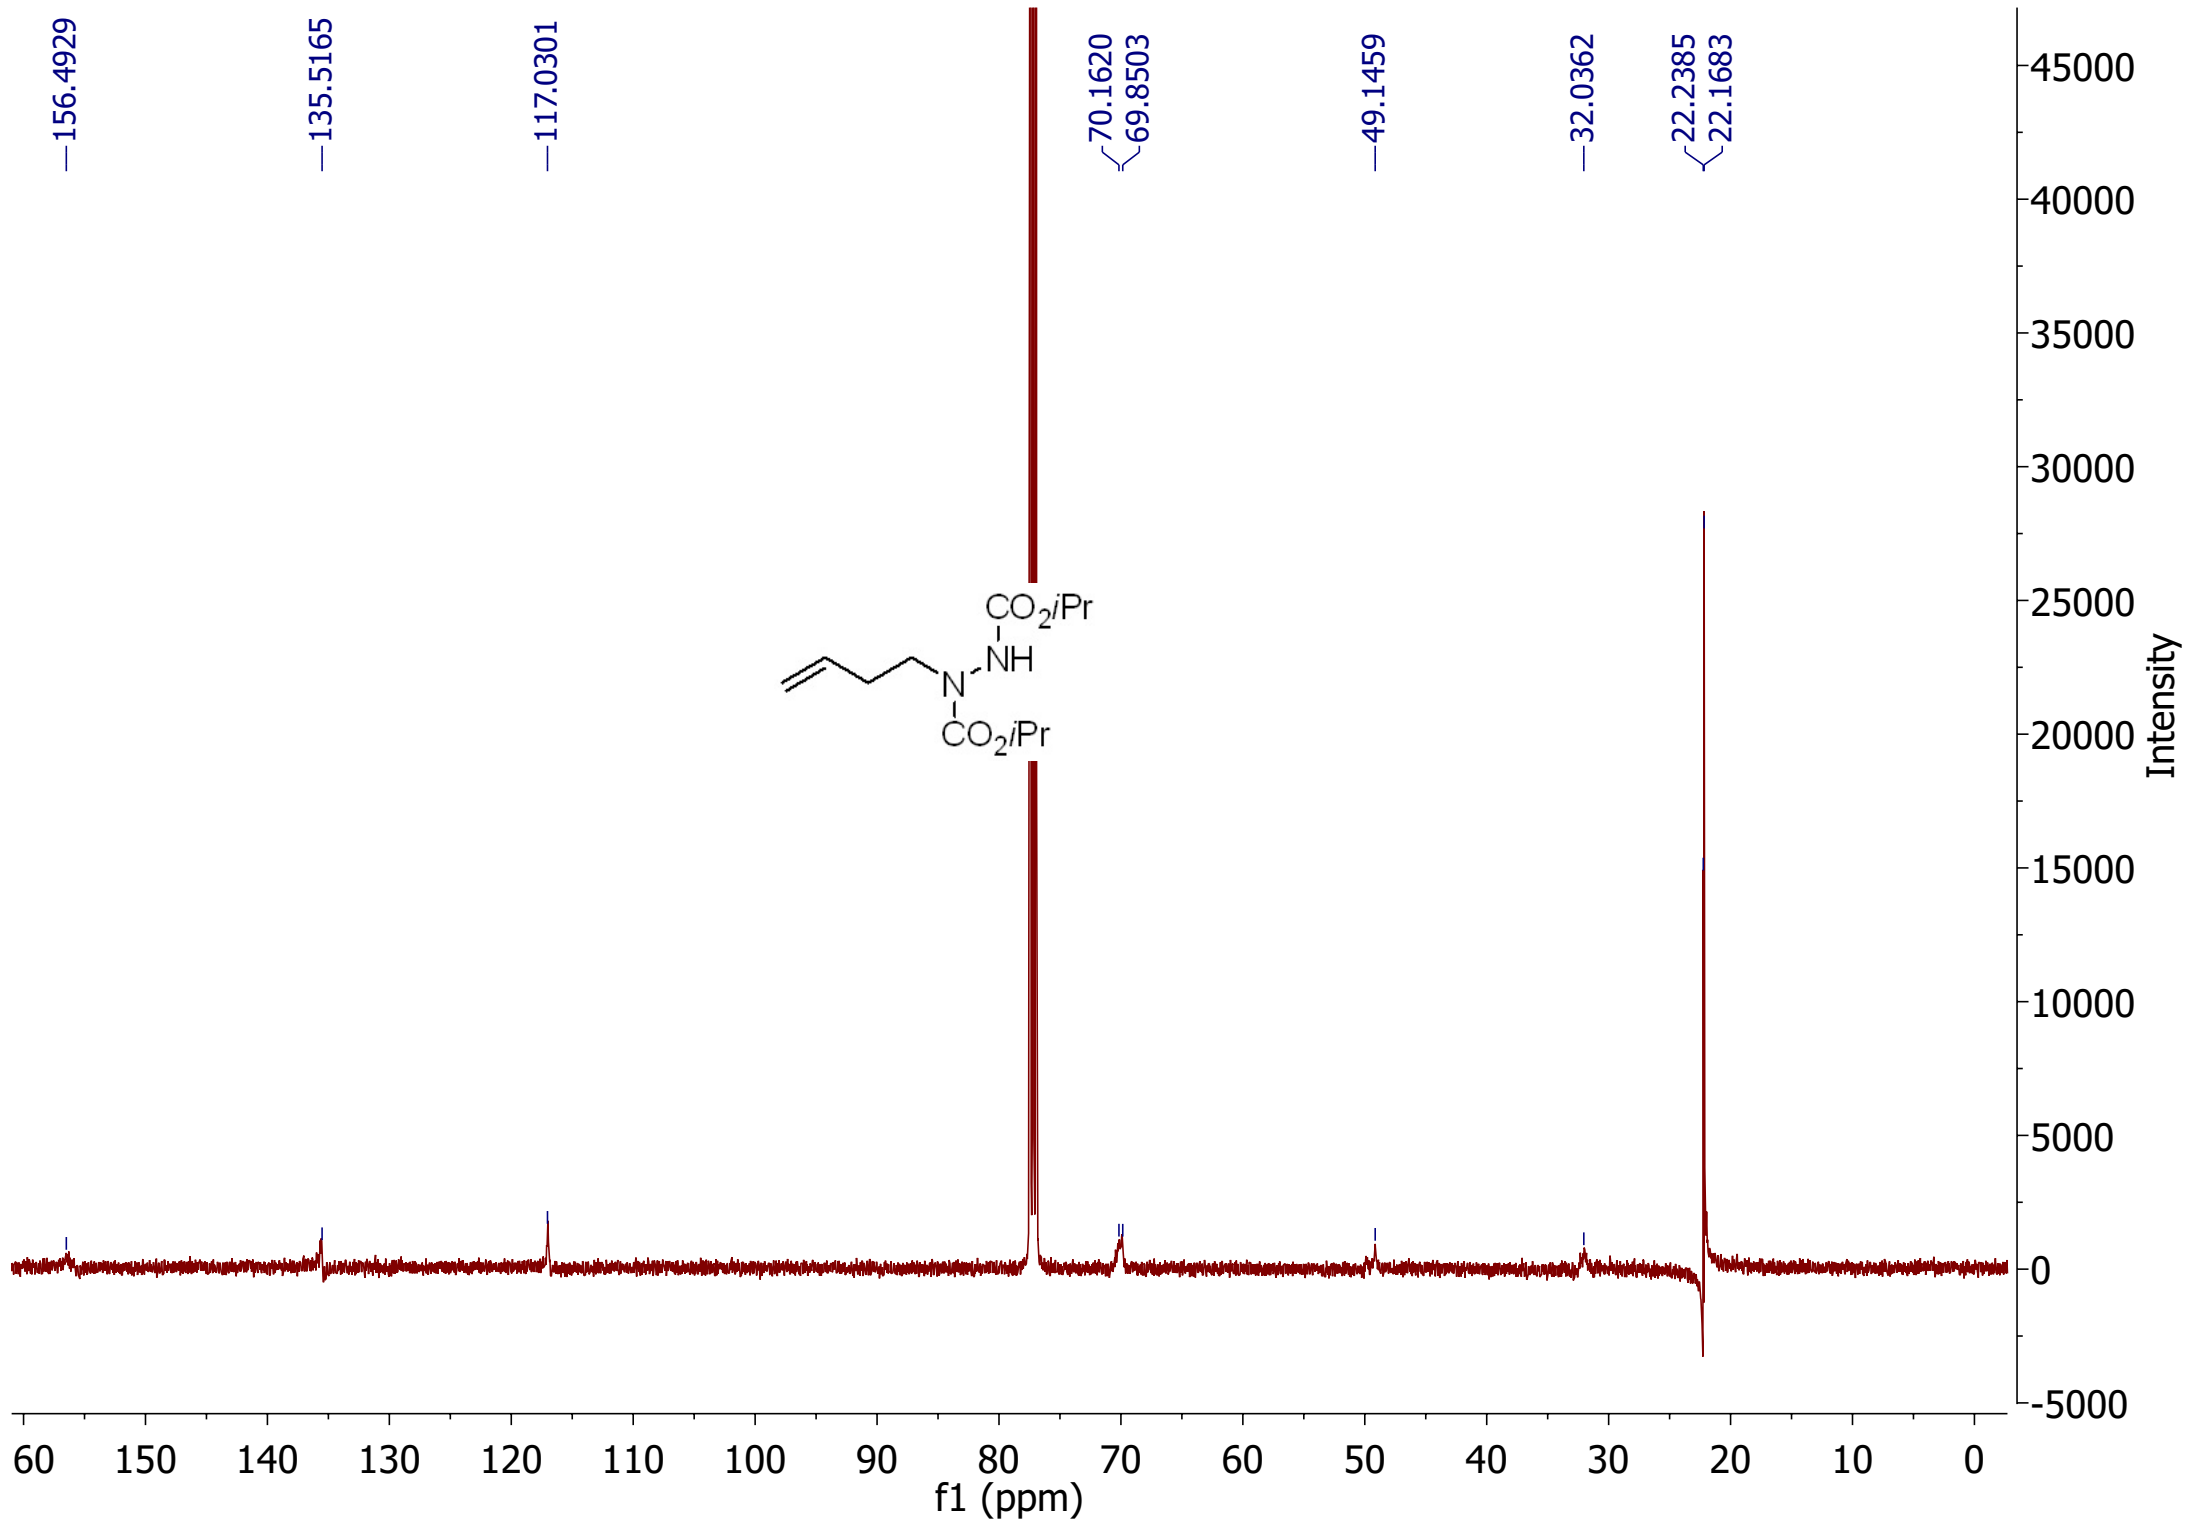

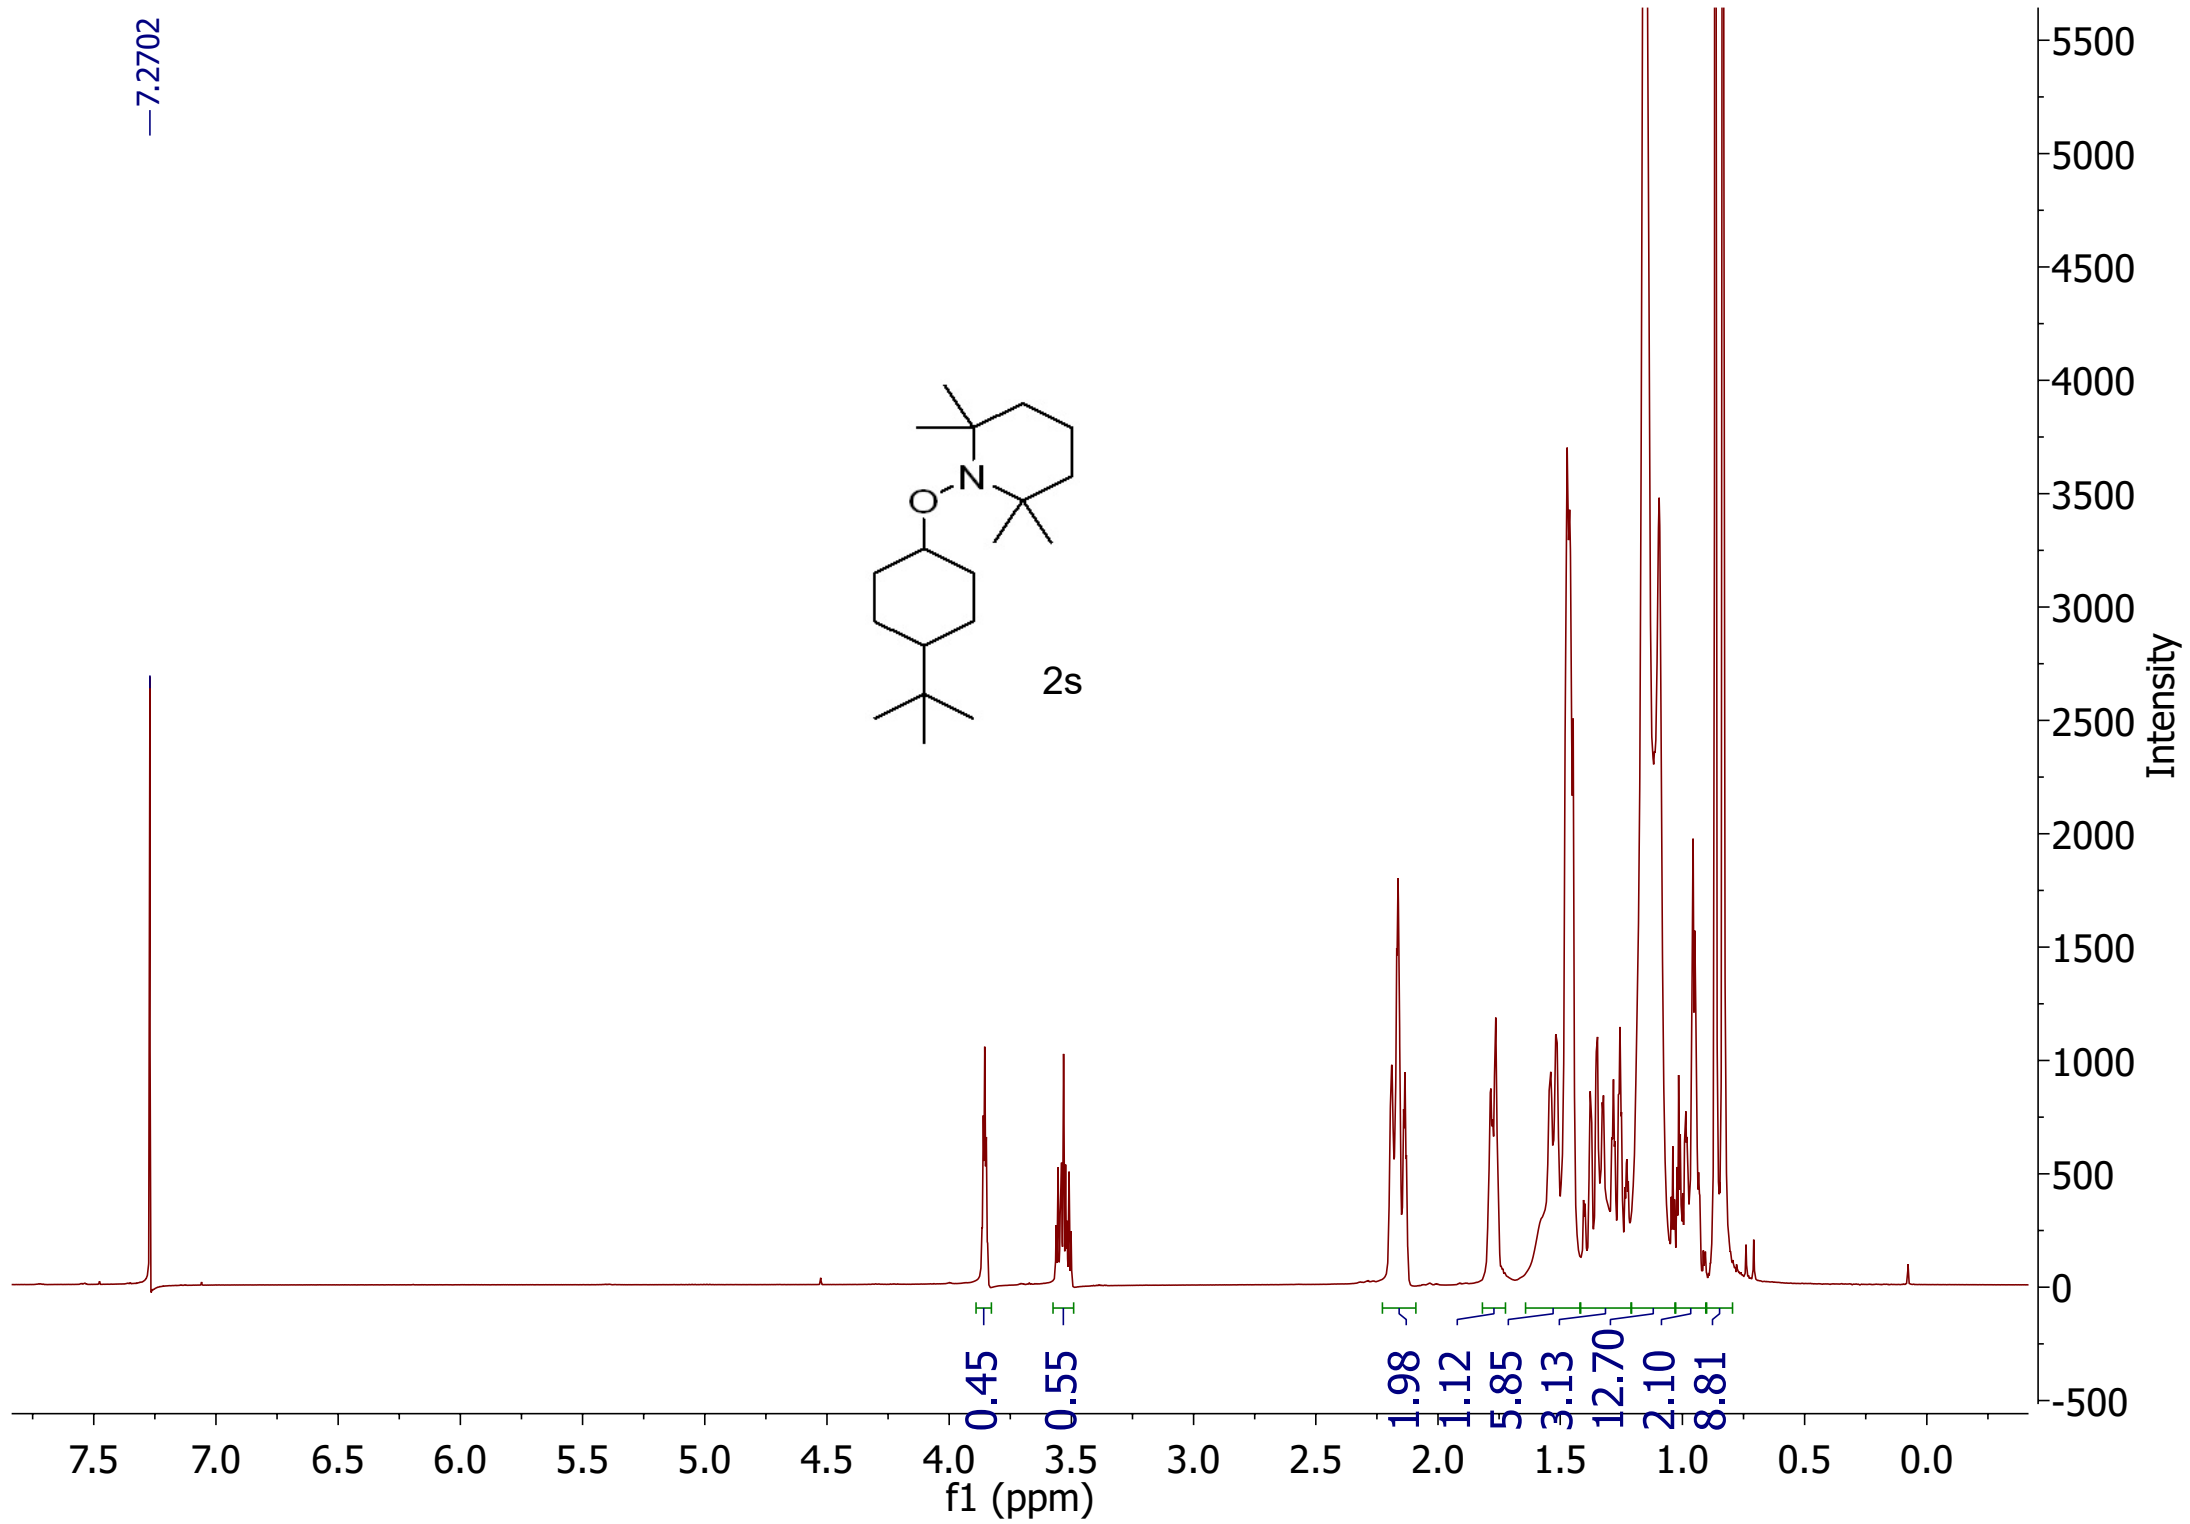

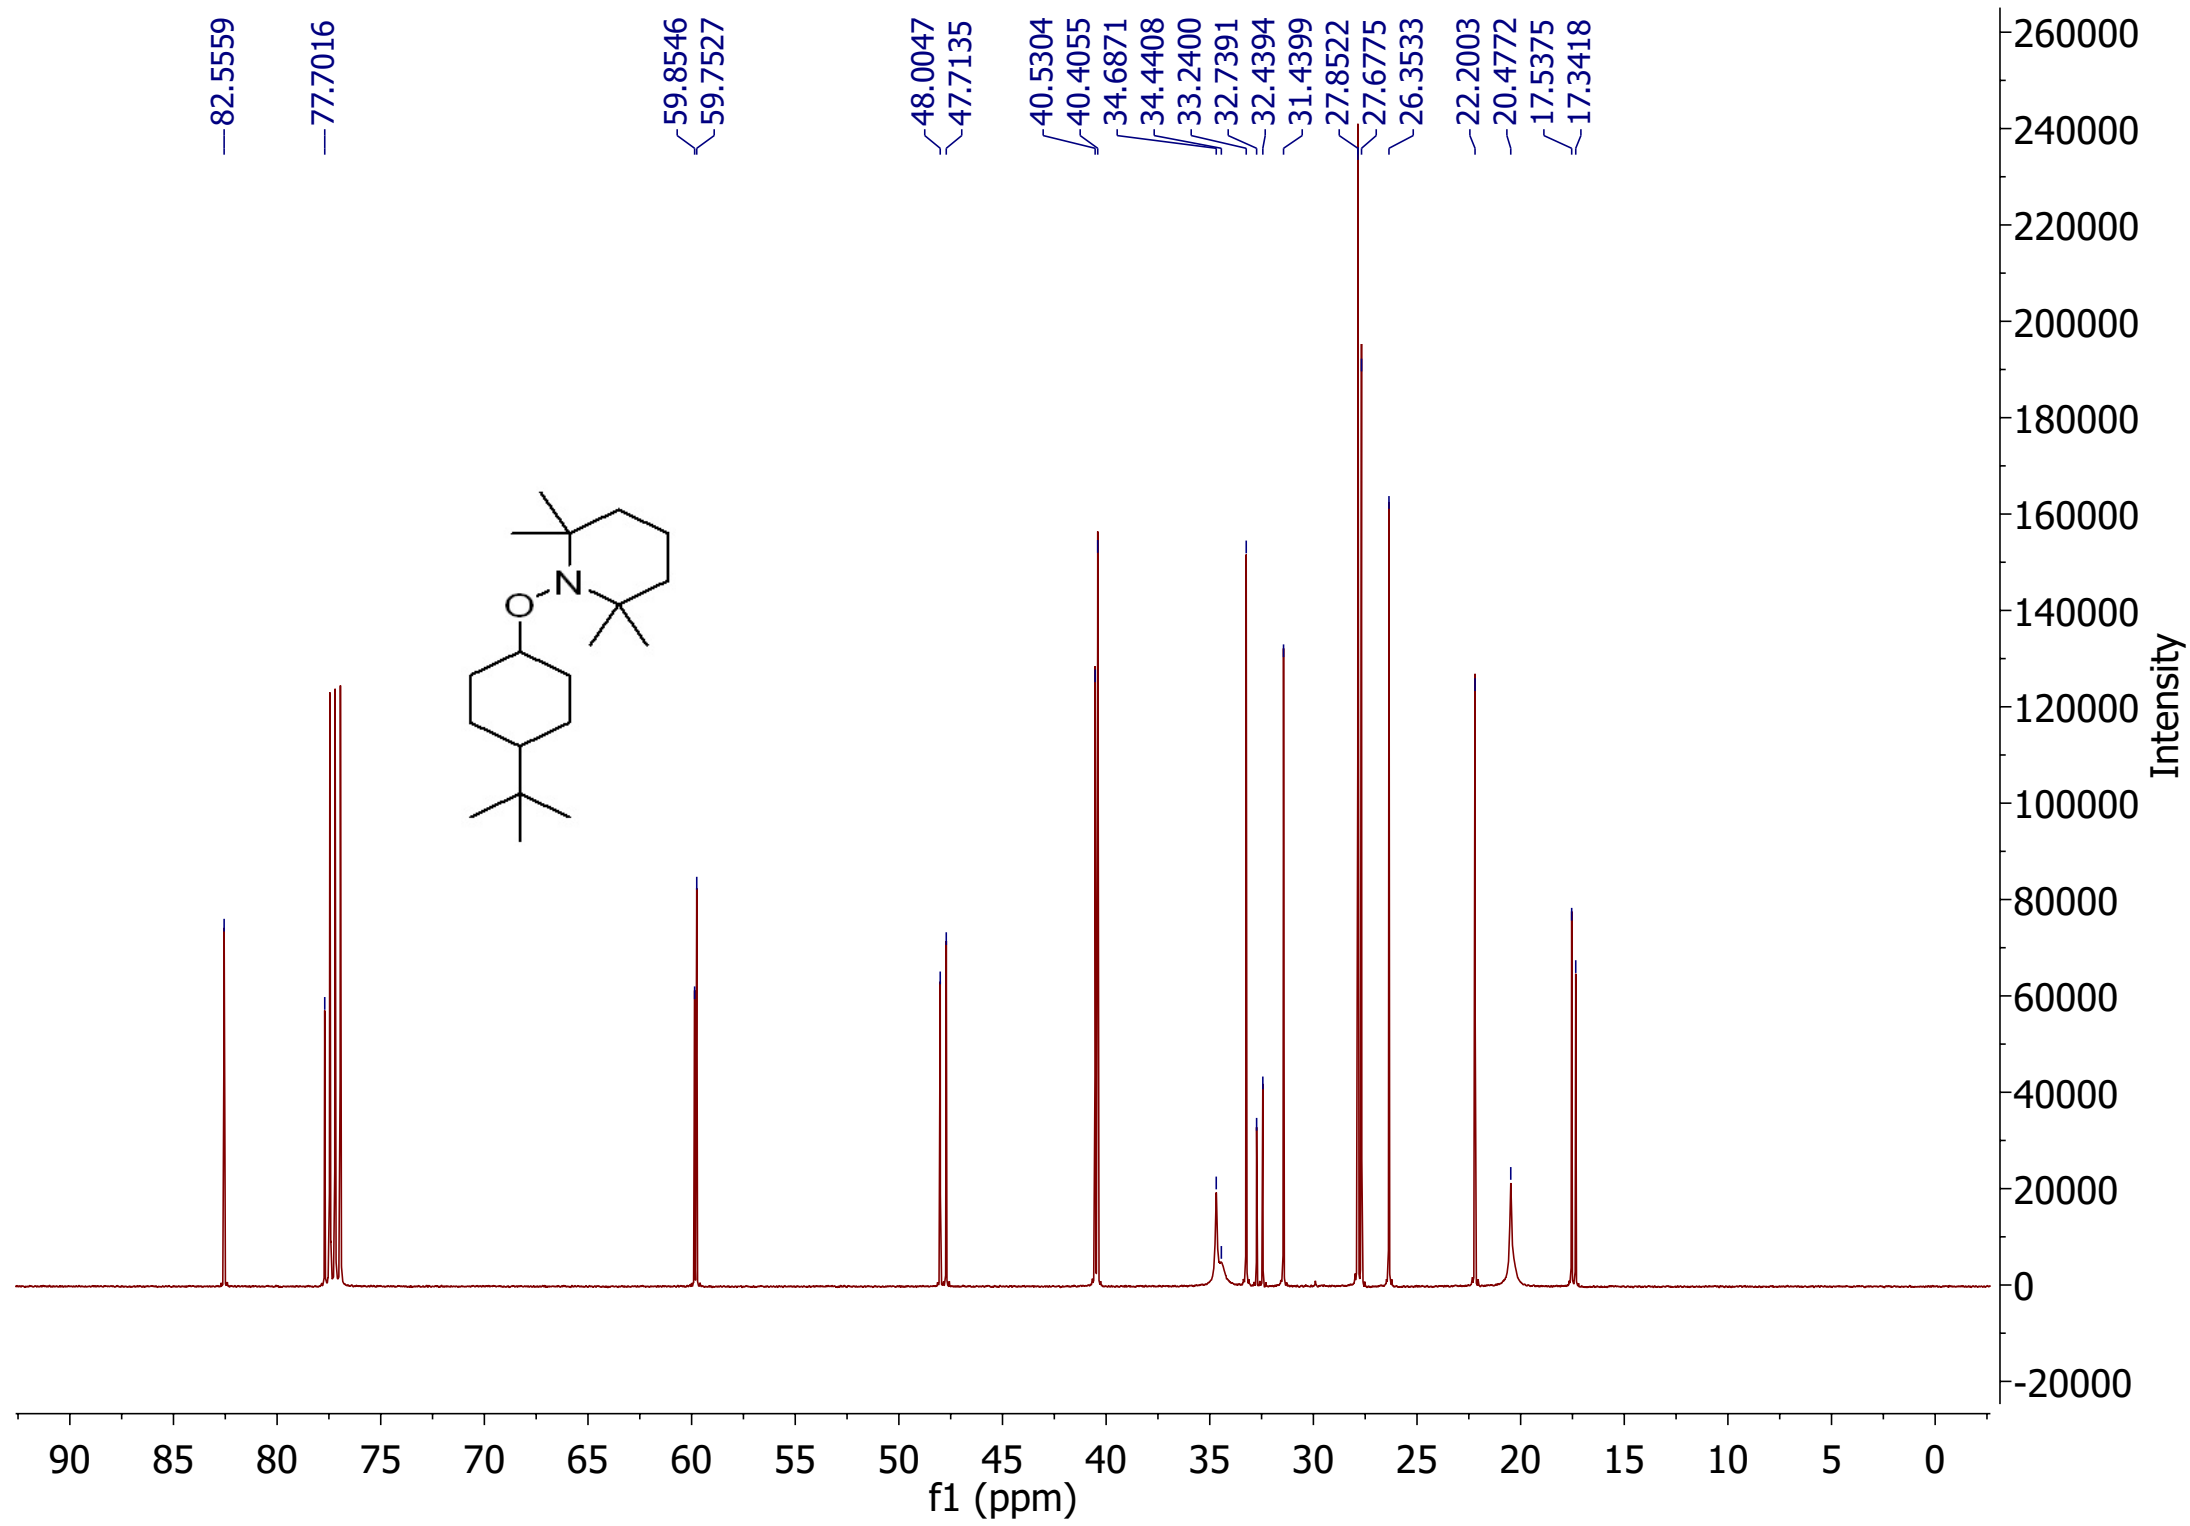

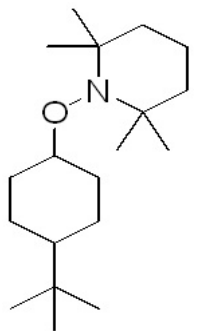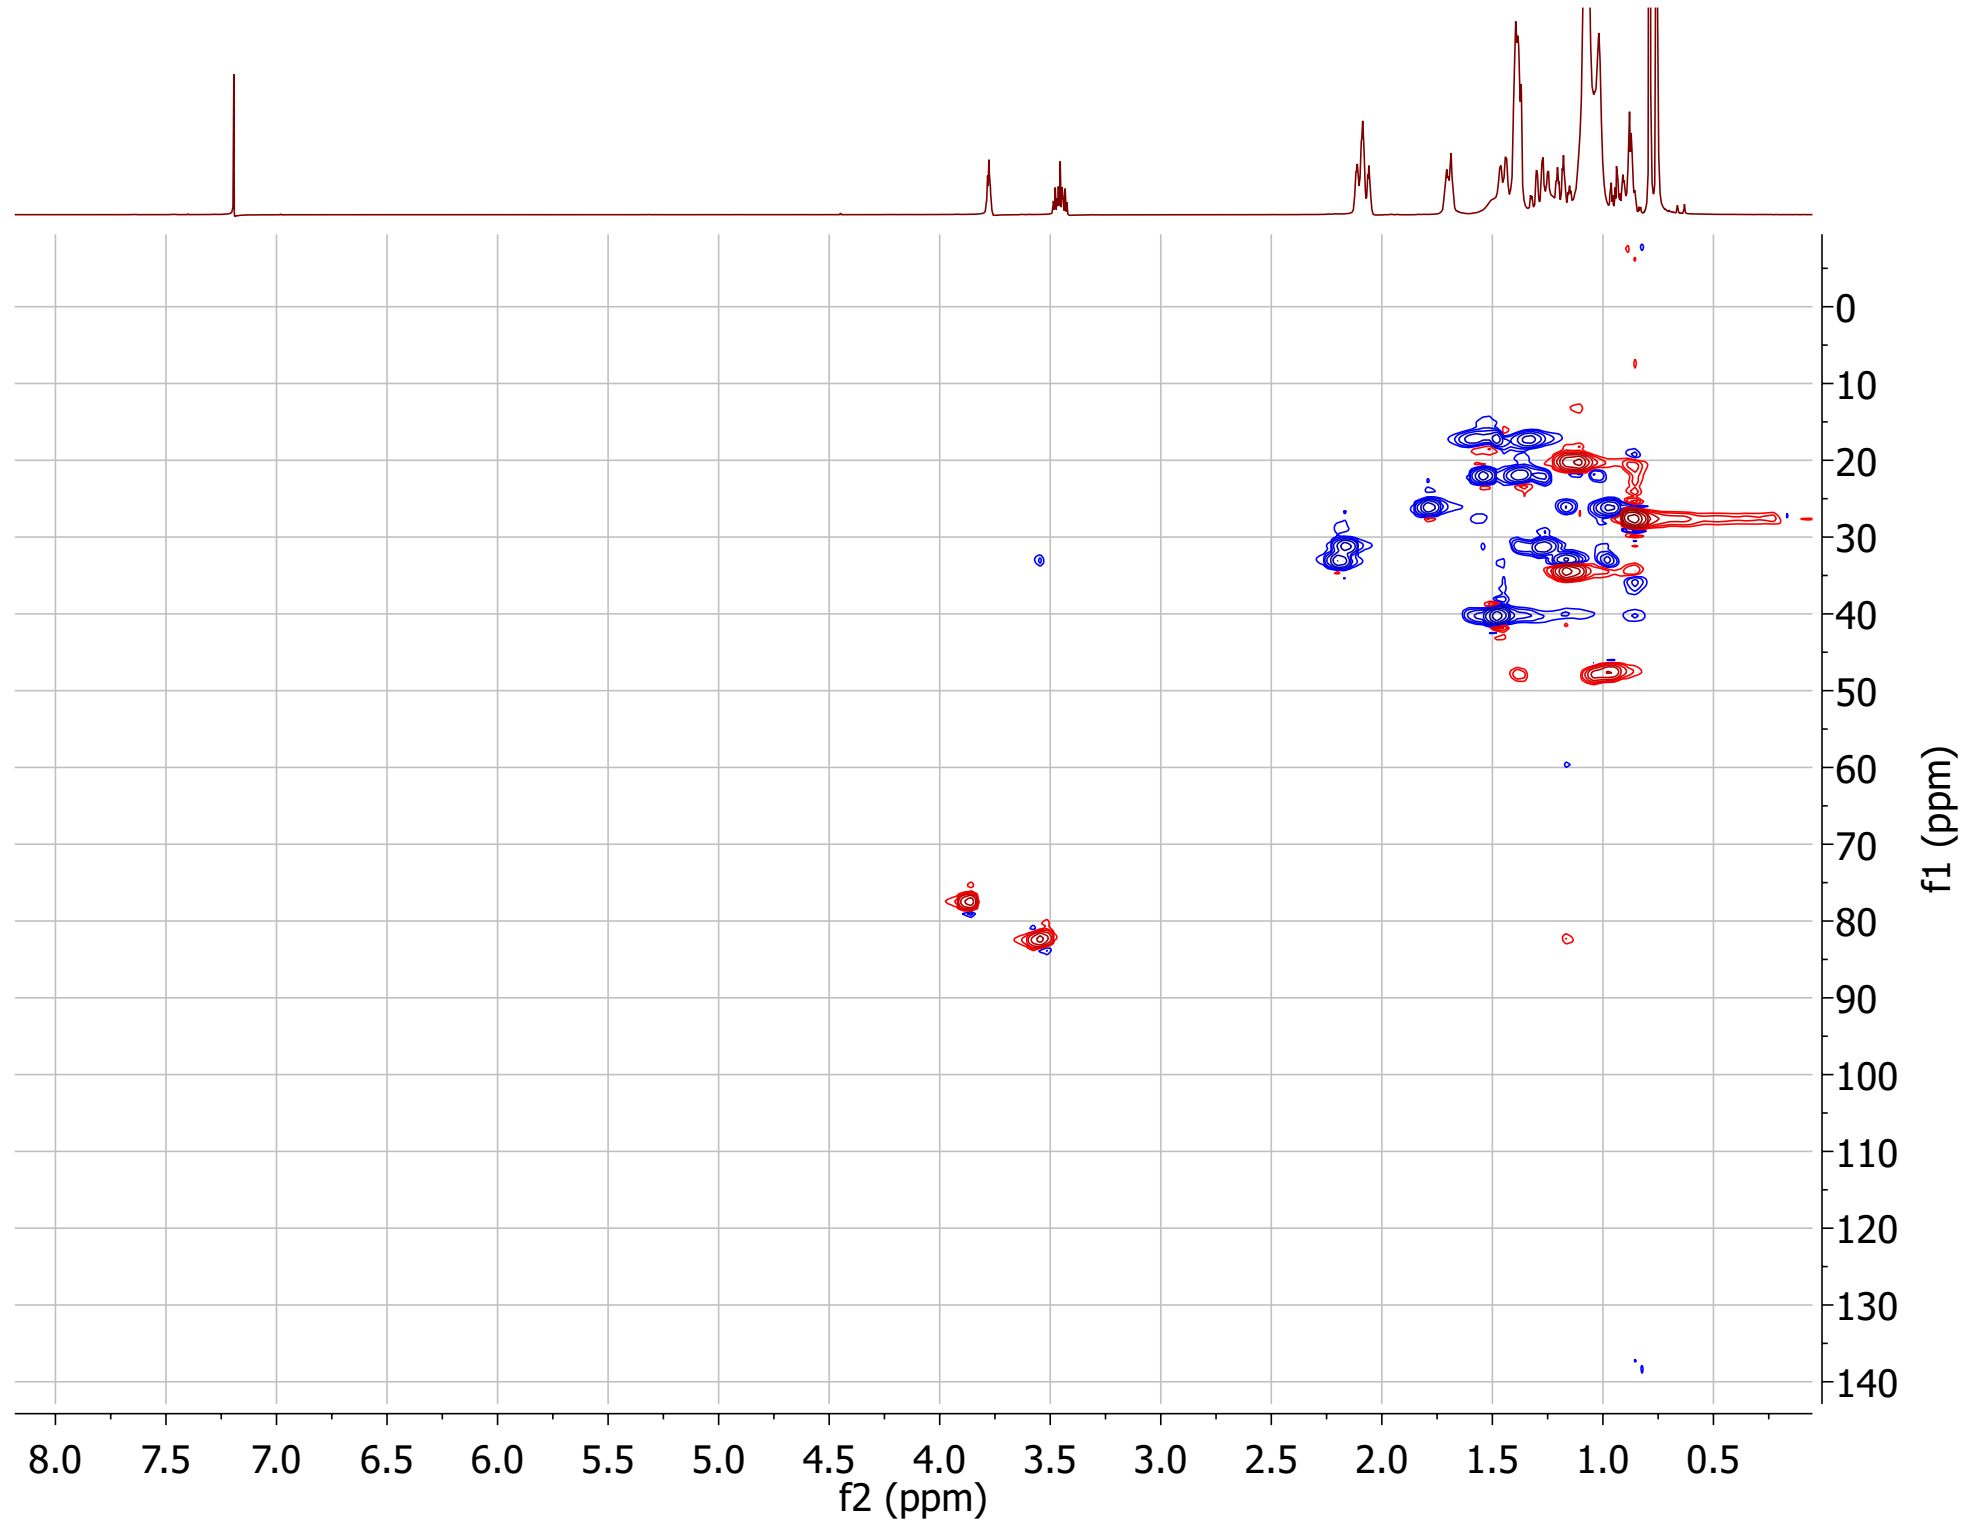

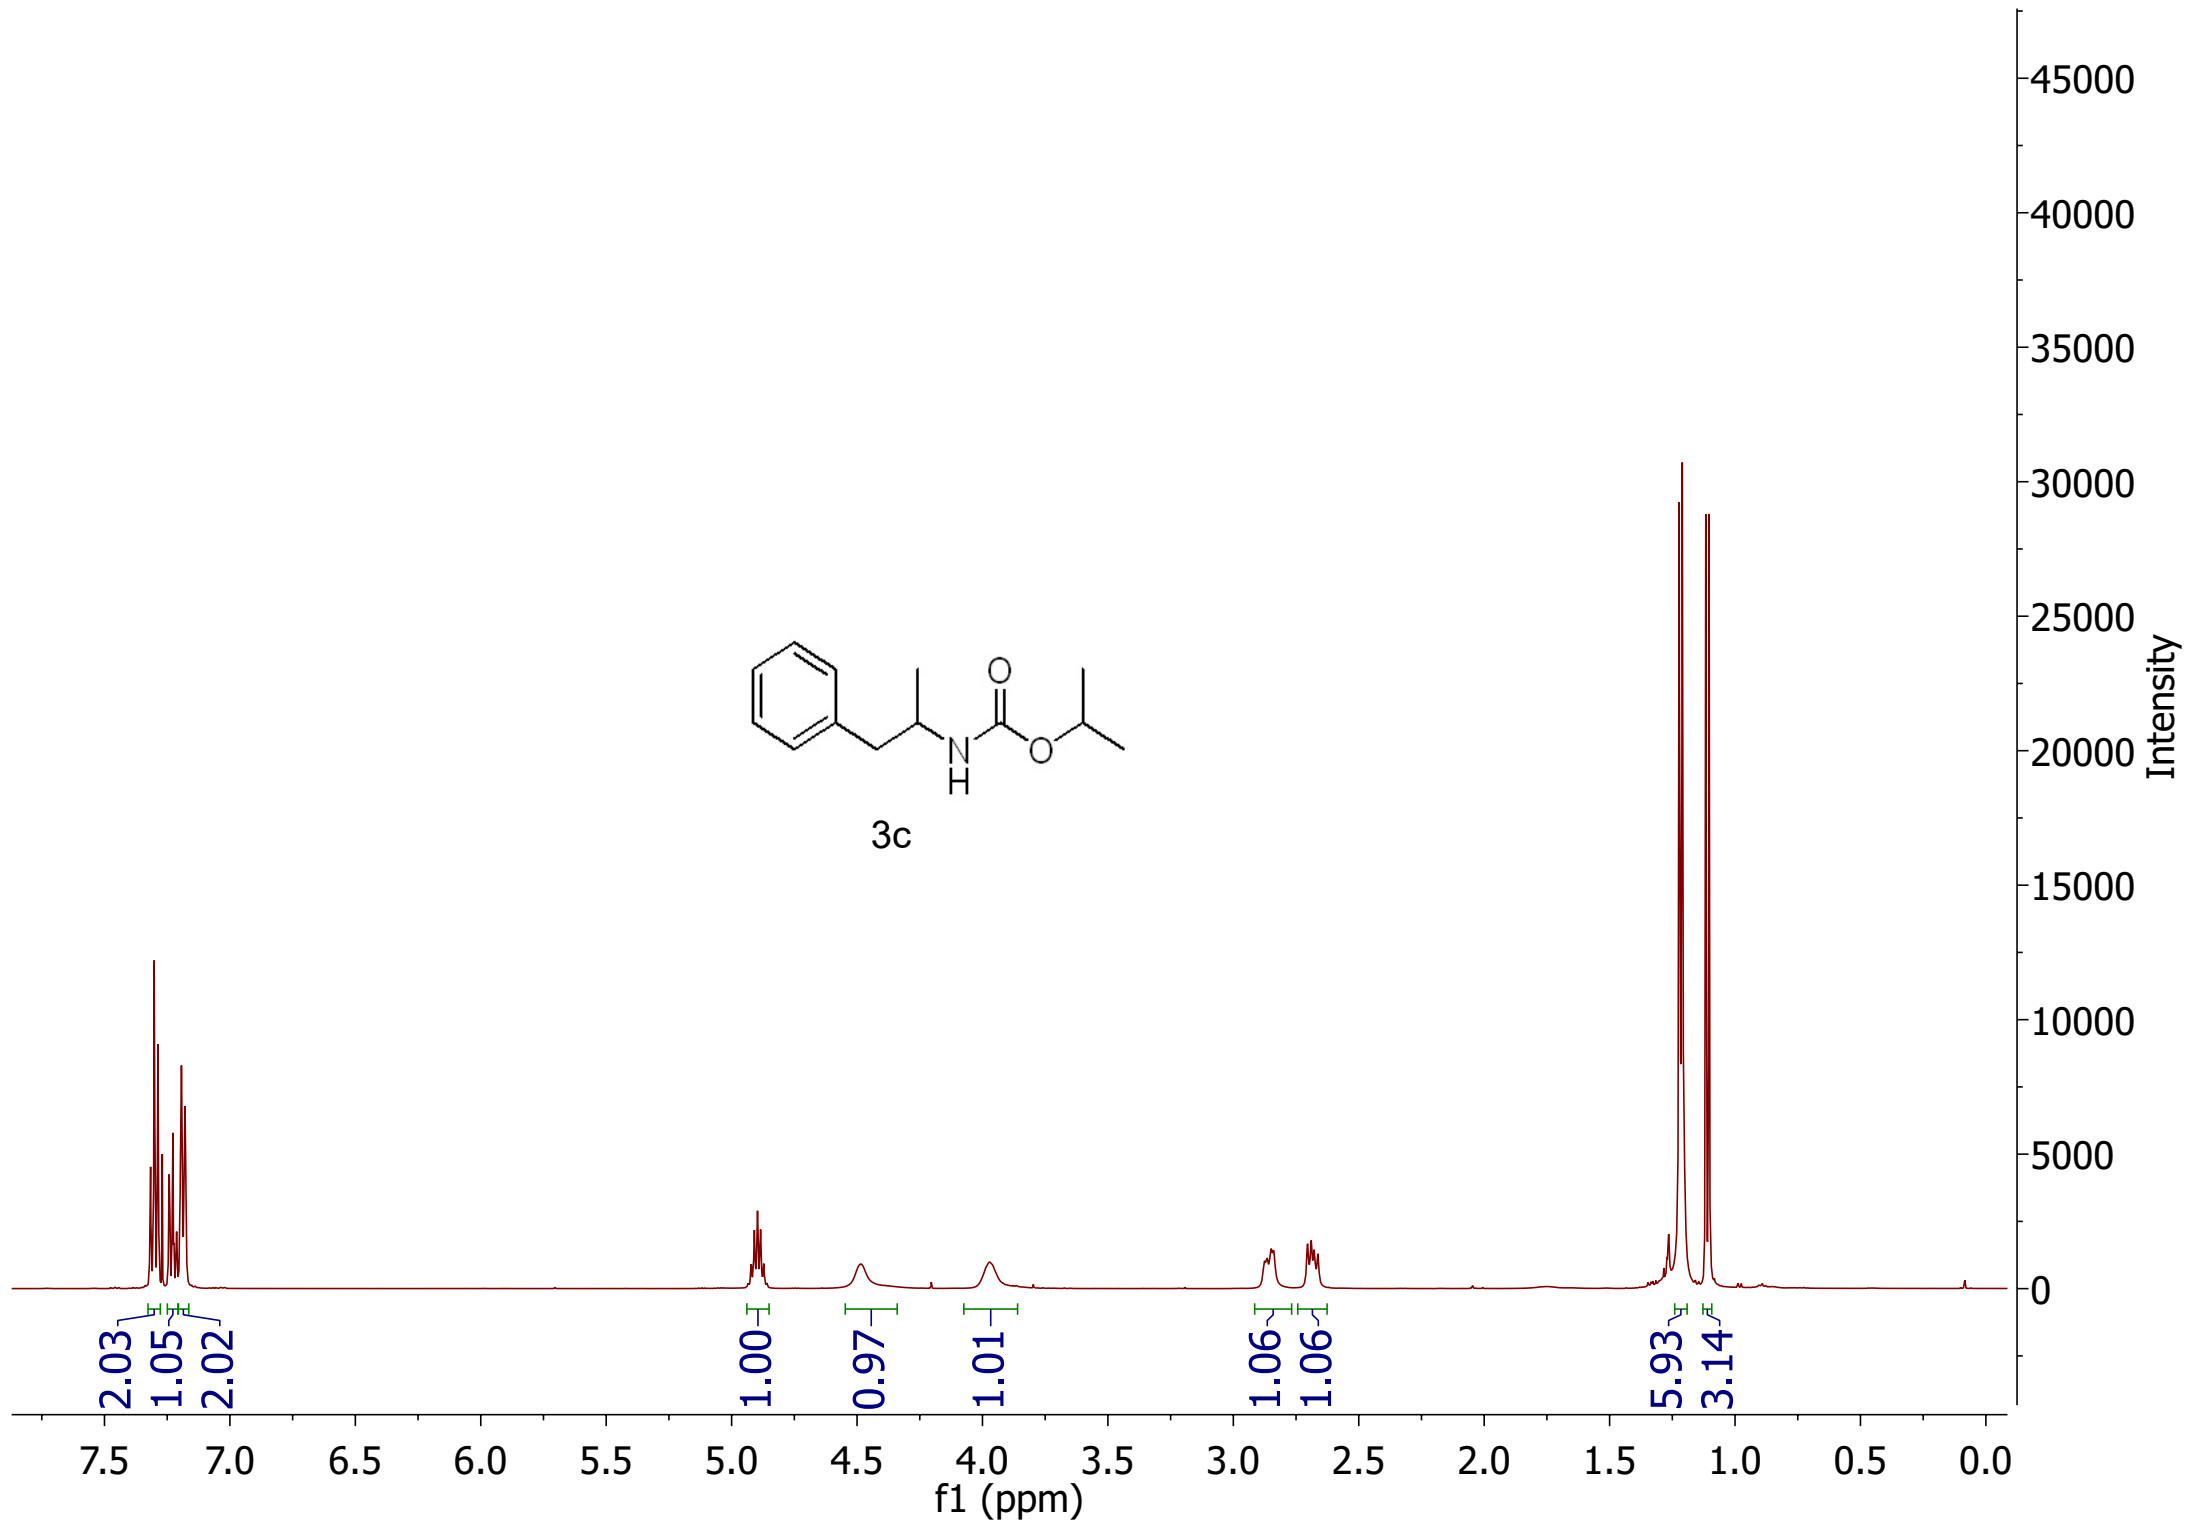

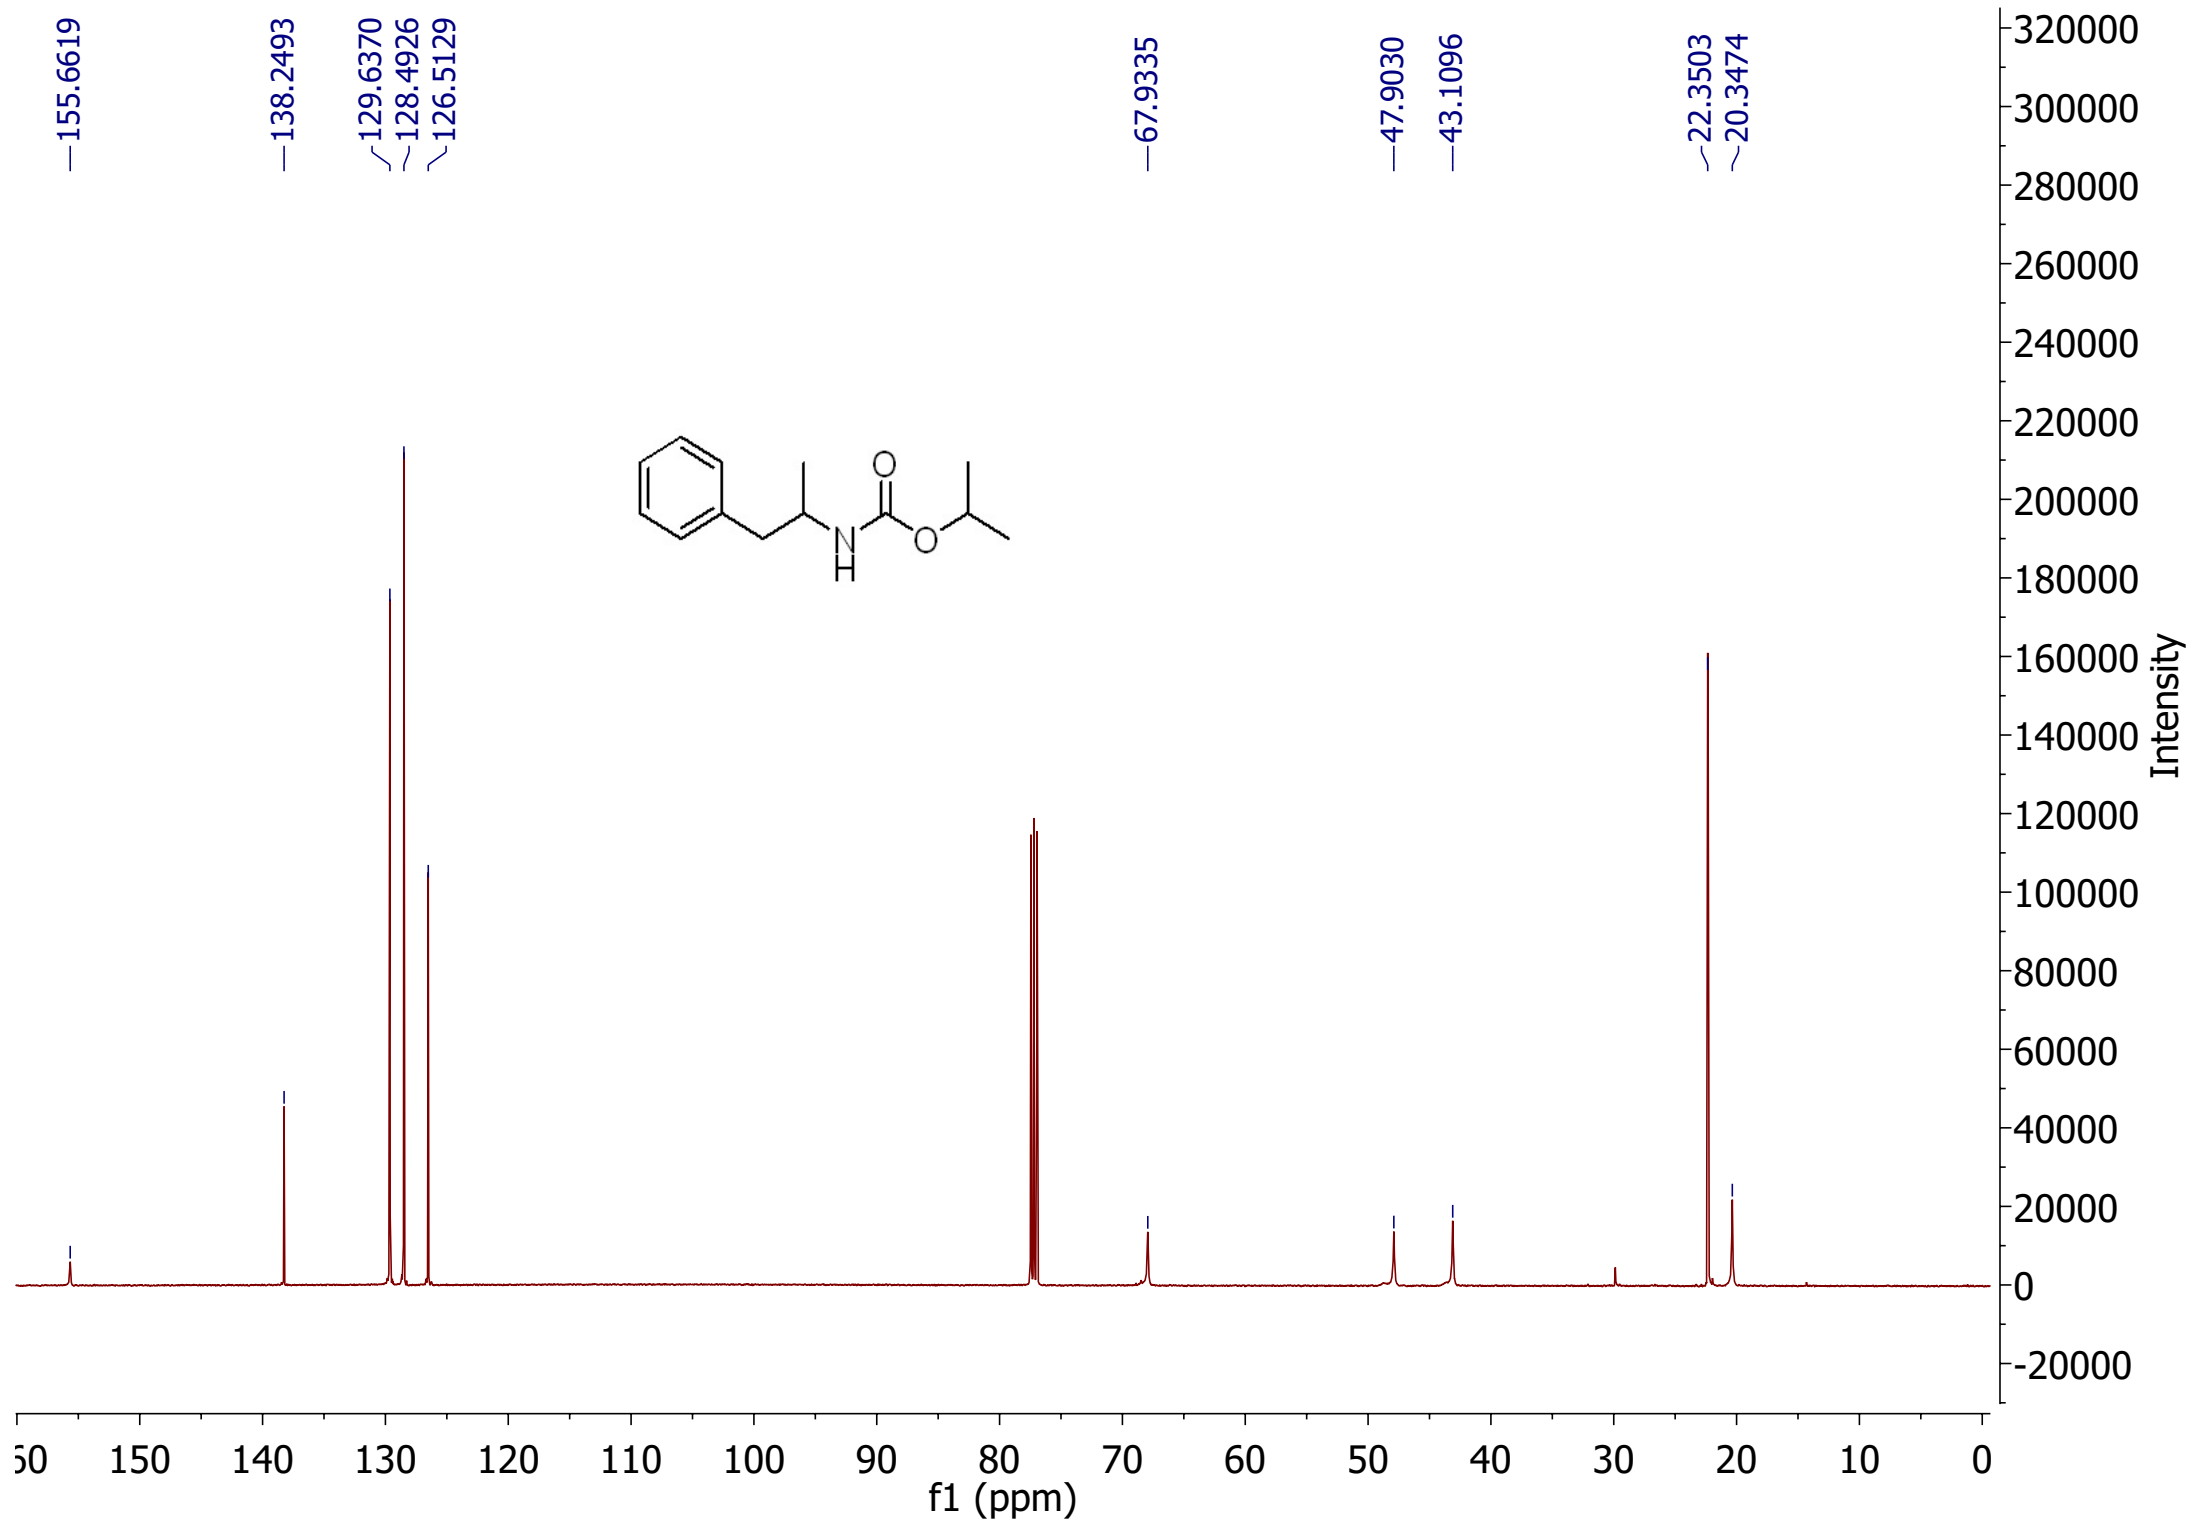

Supplement: NIHMS837143-supplement-Supporting_Information.pdf [file NIHMS837143-supplement-Supporting_Information.pdf]
